# Supplementary material for: Copper-catalyzed azodicarboxylate–alkyne (3 + 2) cycloaddition
Source: Royal Society of Chemistry journal article supplement (doi:10.1039/d5qo01596k), 2026-01-01

## Supporting Information

### Copper-Catalyzed Azodicarboxylate-Alkyne (3+2) Cycloaddition

Jian Lei,<sup>ab\*</sup> Jiayu Zhao,<sup>a</sup> Jiangbin Guo,<sup>a</sup> Xiaoyun Guo,<sup>a</sup> Zhiwei Zeng,<sup>a</sup> Xiaolan Xie<sup>a</sup> and Fengjiao Lv<sup>a</sup>

<sup>a</sup>College of Chemical Engineering and Materials Science, Quanzhou Normal University, Quanzhou 362000, PR China

<sup>b</sup>Key Laboratory of Chemical Materials and Green Nanotechnology, College of Chemical Engineering and Materials Science, Quanzhou Normal University, Quanzhou 362000, China

E-mail: leijian0902@hotmail.com

#### Table of Contents

|                                                                                |      |
|--------------------------------------------------------------------------------|------|
| I. General considerations .....                                                | S-2  |
| II. Optimization of reaction conditions .....                                  | S-3  |
| III. Synthesis and characterization of terminal alkynes.....                   | S-6  |
| IV. General procedure for the azodicarboxylate-alkyne (3+2) cycloaddition..... | S-8  |
| V. Characterization data for the products.....                                 | S-8  |
| VI. Synthetic applications .....                                               | S-30 |
| VII. Mechanistic studies.....                                                  | S-37 |
| VIII. References .....                                                         | S-39 |
| IX. Copies of NMR spectra.....                                                 | S-39 |

## I. General considerations

**Reagents.** Unless otherwise indicated, all reactions were carried out in Schlenk tube under an argon atmosphere with dry solvents. Anhydrous isopropanol and anhydrous acetonitrile were purchased from JK Chemical and used as received. Ether/THF was dried and purified by distillation from sodium/benzophenone.  $\text{CH}_2\text{Cl}_2$  were distilled from  $\text{CaH}_2$ . Anhydrous  $\text{CuCl}_2$  was purchased from Aladdin. Other copper catalysts were purchased from Alfa Aesar, Strem, Aladdin or JK Chemical and used as received. All other reagents were purchased from commercial sources and used as received. For reactions that require heating, oil bath was used as the heat source.

**Analytical Methods.** All new compounds were characterized by  $^1\text{H}$  NMR,  $^{13}\text{C}$  NMR, and HRMS. NMR spectra were recorded on a Bruker AV-400 instrument in  $\text{DMSO}-d_6$  or  $\text{CDCl}_3$ . All  $^1\text{H}$  NMR chemical shifts are reported in parts per million (ppm) and are referenced relative to the residual solvent signals of  $\text{DMSO}-d_6$  ( $\delta = 2.50$  ppm) and  $\text{CDCl}_3$  ( $\delta = 7.26$  ppm). All  $^{13}\text{C}$  NMR spectra are reported in ppm relative to the residual solvent signals of  $\text{DMSO}-d_6$  ( $\delta = 39.50$  ppm) and  $\text{CDCl}_3$  ( $\delta = 77.00$  ppm). Coupling constants are reported in Hz with multiplicities denoted as s (singlet), d (doublet), t (triplet), q (quartet), m (multiplet) and br (broad). Column chromatography was performed over silica gel (200-300 mesh) using petroleum ether and ethyl acetate as the eluent. Reactions were monitored by thin-layer chromatography (TLC) carried out on commercial silica gel plates (GF254) using UV light as a visualizing agent. High-resolution mass spectra (HRMS; (ESI)) were acquired with quadrupole and time-of-flight (TOF) mass spectrometers.

## II. Optimization of reaction conditions

### 1 Catalyst:

The best result was obtained using CuCl<sub>2</sub> as the catalyst, which offers the advantages of bench stability and low cost. Substitution of the catalyst with CuBr<sub>2</sub>, CuCl, Cu(OAc)<sub>2</sub>, or commercially available *Cu-TMEDA* complexes, resulted in reduced yields or failure to produce target compound **3a**.

**Table S1. Catalyst Screening**

| entry    | catalyst                     | yield of <b>3a(4a)</b> <sup>a</sup> |
|----------|------------------------------|-------------------------------------|
| 1        | -                            | 0                                   |
| <b>2</b> | <b>CuCl<sub>2</sub></b>      | <b>86%</b>                          |
| 3        | CuBr <sub>2</sub>            | 70%                                 |
| 4        | Cu(OAc) <sub>2</sub>         | 0(17%)                              |
| 5        | <i>Cu-TMEDA</i> <sup>b</sup> | 74%                                 |
| 6        | CuCl                         | 75%                                 |

<sup>a</sup>0.4 mmol scale experiment, yields were determined by <sup>1</sup>H NMR using 4-nitroacetophenone as internal standard, the yield of **4a** in parentheses. <sup>b</sup>the reaction was performed without extra TMEDA and base.

### 2 Ligand:

Alternative ligands did not facilitate the formation of the desired product.

**Table S2. Ligand Screening**

| entry    | ligand       | yield of <b>3a</b> <sup>a</sup> |
|----------|--------------|---------------------------------|
| 1        | -            | 0                               |
| 2        | DMAP         | trace                           |
| <b>3</b> | <b>TMEDA</b> | <b>86%</b>                      |
| 4        | DMEDA        | 0                               |
| 5        | 1,10-phen    | 0                               |

<sup>a</sup>0.4 mmol scale experiment, yields were determined by <sup>1</sup>H NMR using 4-nitroacetophenone as internal standard.

### 3 Base:

DABCO was identified as the optimal base, as its omission or substitution with other bases led to lower yields, while variations in its loading within a reasonable range had no significant impact.

**Table S3.** Base Screening

| entry    | base                           | yield of <b>3a</b> <sup>a</sup> |
|----------|--------------------------------|---------------------------------|
| 1        | -                              | 63%                             |
| <b>2</b> | <b>DABCO</b>                   | <b>86%</b>                      |
| 3        | K <sub>2</sub> CO <sub>3</sub> | 72%                             |
| 4        | Et <sub>3</sub> N              | 66%                             |
| 5        | DABCO (0.02 equiv.)            | 78%                             |
| 6        | DABCO (0.1 equiv.)             | 85%                             |
| 7        | DABCO (0.5 equiv.)             | 83%                             |

<sup>a</sup>0.4 mmol scale experiment, yields were determined by <sup>1</sup>H NMR using 4-nitroacetophenone as internal standard.

### 4 Equivalents of DBAD:

**Table S4.** Screening of Equivalents of DBAD

| entry    | x          | yield of <b>3a</b> <sup>a</sup> |
|----------|------------|---------------------------------|
| 1        | 1.0        | 65%                             |
| 2        | 1.2        | 72%                             |
| <b>3</b> | <b>1.5</b> | <b>86%</b>                      |
| 4        | 2.0        | 82%                             |

<sup>a</sup>0.4 mmol scale experiment, yields were determined by <sup>1</sup>H NMR using 4-nitroacetophenone as internal standard.

### 5 Solvent:

A range of solvents and solvent mixtures with different composition ratios were evaluated. The results with single solvents were generally unsatisfactory. It is worth noting that the choice of alcohol was found to be paramount. The reaction afforded low yields **3a** with methanol or ethanol and a 43% yield with *tert*-butanol (ca. 9% **4a**), while isopropanol achieved a 69% yield. Furthermore, adjusting the solvent composition ratio was also shown to provide improved reaction outcomes.



**Table S5. Solvent Screening**

| entry     | solvent                                  | yield of <b>3a(4a)</b> <sup>a</sup> |
|-----------|------------------------------------------|-------------------------------------|
| 1         | CH <sub>2</sub> Cl <sub>2</sub>          | ca. 36%(27%)                        |
| 2         | toluene                                  | 0(7%)                               |
| 3         | EtOAc                                    | 0(33%)                              |
| 4         | MeCN                                     | 44%(ca. 17%)                        |
| 5         | MeOH                                     | 6%                                  |
| 6         | EtOH                                     | 8%                                  |
| 7         | <sup>i</sup> PrOH                        | 69%                                 |
| 8         | <sup>t</sup> BuOH                        | 43%(ca. 10%)                        |
| 9         | <sup>i</sup> PrOH/MeCN = 9:1 (v:v)       | 76%                                 |
| <b>10</b> | <b><sup>i</sup>PrOH/MeCN = 4:1 (v:v)</b> | <b>86%</b>                          |
| 11        | <sup>i</sup> PrOH/MeCN = 1:1 (v:v)       | 80%(<5%)                            |
| 12        | <sup>i</sup> PrOH/MeCN = 2:3 (v:v)       | 74%(ca. 11%)                        |

<sup>a</sup>0.4 mmol scale experiment, yields were determined by <sup>1</sup>H NMR using 4-nitroacetophenone as internal standard, the yield of **4a** in parentheses.

## 6 Reaction time:

The reaction mixture was stirred at 30 °C for x h, followed by further stirring at T °C for y h.

**Table S6. Screening of Reaction Time**

| entry    | x        | T         | y        | yield of <b>3a(4a)</b> <sup>a</sup> |
|----------|----------|-----------|----------|-------------------------------------|
| 1        | 6        | -         | -        | ca.42%(40%)                         |
| 2        | 33       | -         | -        | 82%                                 |
| <b>3</b> | <b>6</b> | <b>50</b> | <b>3</b> | <b>86%</b>                          |
| 4        | 6        | 80        | 3        | 79%                                 |

<sup>a</sup>0.4 mmol scale experiment, yields were determined by <sup>1</sup>H NMR using 4-nitroacetophenone as internal standard, the yield of **4a** in parentheses.

### III. Synthesis and characterization of terminal alkynes

Alkyne **1aj**, **1ak**, **1am**, **1ao**, **1ap** were prepared according to the reported literatures. The  $^1\text{H}$  NMR spectral data matched those of previously reported.

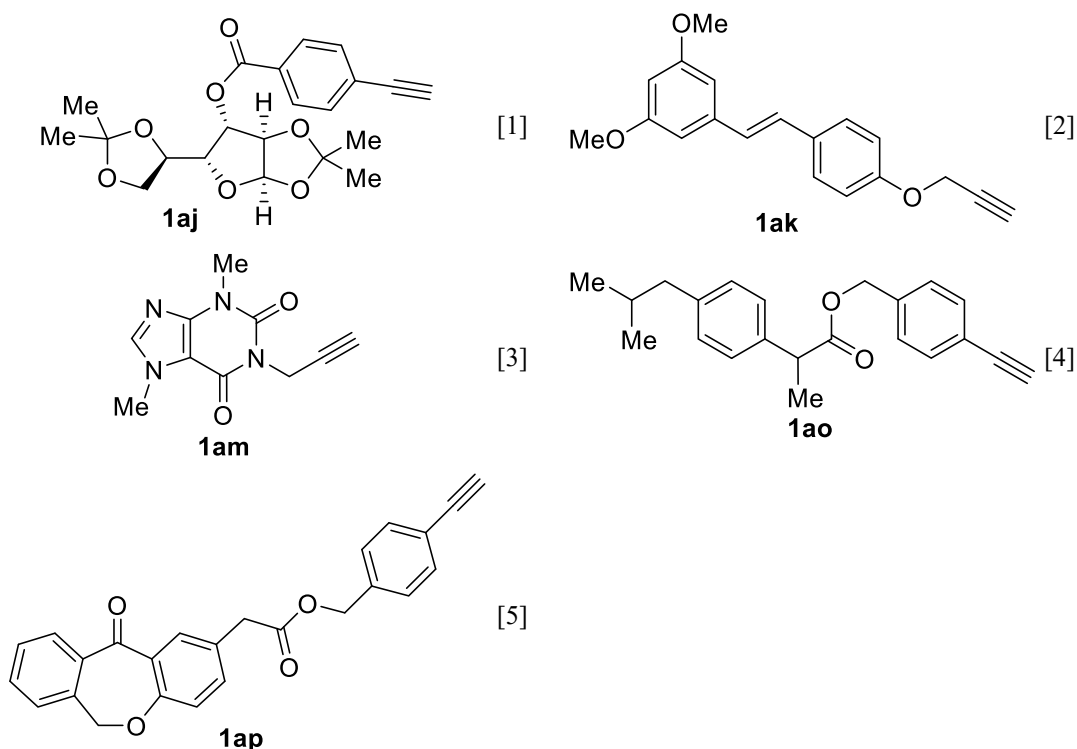

Compound **1al** and **1aq** were synthesized according to procedure literature<sup>[5]</sup>.

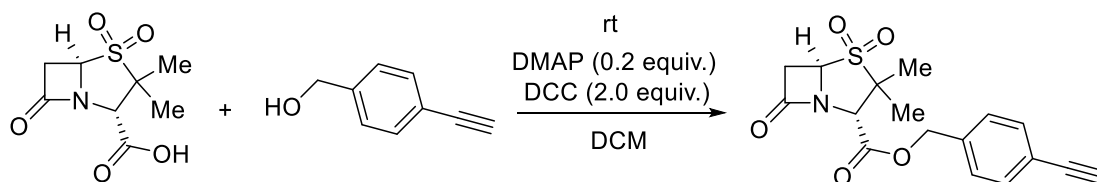

**Sulbactam-derivatived terminal alkyne (1al):** In a 100 mL round-bottom flask equipped with a stir bar, sulbactam acid (1.75 g, 7.5 mmol, 1.5 equiv.), (4-ethynylphenyl)methanol (0.66 g, 5.0 mmol, 1.0 equiv.), and anhydrous DCM (30 mL) were combined. Dicyclohexylcarbodiimide (DCC, 2.06 g, 10.0 mmol, 2.0 equiv.) was added, followed by 4-dimethylaminopyridine (DMAP, 122.0 mg, 1.0 mmol, 0.2 equiv.). The resulting mixture was stirred at room temperature for 12 h. The solid byproduct was removed by filtration, and the filtrate was concentrated under reduced pressure. The crude residue was purified by flash column chromatography to afford the product **1al** (973 mg, 56%) as a white solid, m.p. 89.9~91.0 °C. Considering that compound **3al** is dissolved in DMSO, the starting material **1al**

was also analyzed by NMR using DMSO- $d_6$  as the solvent to facilitate data comparison.  $^1\text{H}$  NMR (400 MHz, DMSO- $d_6$ )  $\delta$  7.51 (d,  $J$  = 8.4 Hz, 2H), 7.45 (d,  $J$  = 8.4 Hz, 2H), 5.28 (d,  $J$  = 12.4 Hz, 1H), 5.23 (d,  $J$  = 12.4 Hz, 1H), 5.20 (dd,  $J$  = 4.4, 1.6 Hz, 1H), 4.53 (s, 1H), 4.25 (s, 1H), 3.67 (dd,  $J$  = 16.4, 4.4 Hz, 1H), 3.26 (dd,  $J$  = 16.4, 1.6 Hz, 1H), 1.45 (s, 3H), 1.29 (s, 3H);  $^{13}\text{C}\{^1\text{H}\}$  NMR (101 MHz, DMSO- $d_6$ )  $\delta$  172.1, 166.7, 135.9, 131.9, 128.7, 121.8, 83.1, 81.4, 66.8, 62.25, 62.21, 60.4, 37.3, 19.5, 17.7; HRMS (ESI)  $m/z$ :  $[\text{M} + \text{Na}]^+$  Calcd for  $\text{C}_{17}\text{H}_{17}\text{NNaO}_5\text{S}^+$  370.0720, found 370.0715.

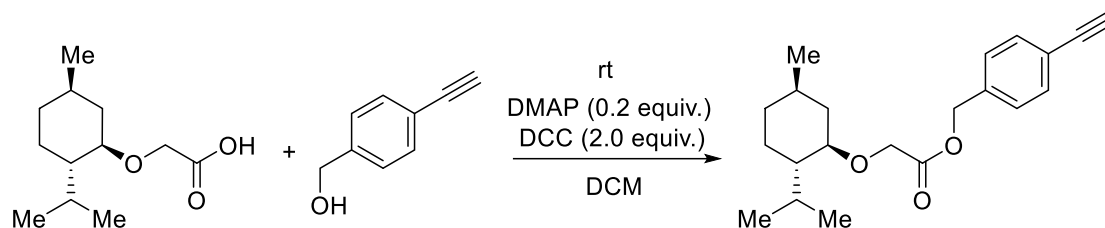

**(-)-Menthol-derived terminal alkyne (1aq):** In a 100 mL round-bottom flask equipped with a stir bar, (-)-menthoxyacetic acid (1.61 g, 7.5 mmol, 1.5 equiv.), (4-ethynylphenyl)methanol (0.66 g, 5.0 mmol, 1.0 equiv.), and anhydrous DCM (30 mL) were combined. Dicyclohexylcarbodiimide (DCC, 2.06 g, 10.0 mmol, 2.0 equiv.) was added, followed by 4-dimethylaminopyridine (DMAP, 122.0 mg, 1.0 mmol, 0.2 equiv.). The resulting mixture was stirred at room temperature for 12 h. The solid byproduct was removed by filtration, and the filtrate was concentrated under reduced pressure. The crude residue was purified by flash column chromatography to afford the product **1aq** (1.22 g, 74%) as a white solid, m.p. 67.0~68.0 °C. Considering that the product **3aq** is dissolved in DMSO, the starting material **1ar** was also tested by NMR using DMSO- $d_6$  as the solvent to facilitate data comparison.  $^1\text{H}$  NMR (400 MHz, DMSO- $d_6$ )  $\delta$  7.48 (d,  $J$  = 8.0 Hz, 2H), 7.38 (d,  $J$  = 8.0 Hz, 2H), 5.14 (s, 2H), 4.21 (s, 1H), 4.19-4.06 (m, 2H), 3.18-3.08 (m, 1H), 2.27-2.17 (m, 1H), 2.09-2.01 (m, 1H), 1.63-1.52 (m, 2H), 1.34-1.24 (m, 1H), 1.19-1.09 (m, 1H), 0.99-0.65 (m, 12H);  $^{13}\text{C}\{^1\text{H}\}$  NMR (101 MHz, DMSO- $d_6$ )  $\delta$  170.4, 136.8, 131.7, 128.2, 121.4, 83.2, 81.1, 79.0, 65.2, 65.0, 47.8, 39.7, 34.0, 30.8, 25.0, 22.9, 22.2, 20.9, 16.3; HRMS (ESI)  $m/z$ :  $[\text{M} + \text{Na}]^+$  Calcd for  $\text{C}_{21}\text{H}_{28}\text{NaO}_3^+$  351.1931, found 351.1925.

#### IV. General procedure for the azodicarboxylate-alkyne (3+2) cycloaddition

**General Procedure:** In a 15 mL resealable screw-cap test tube, solid reagents—including di-*tert*-butyl azodicarboxylate (DBAD, 138.4 mg, 0.6 mmol, 1.5 equiv.), 1,4-diazabicyclo[2.2.2]octane (DABCO, 2.2 mg, 0.02 mmol, 0.05 equiv.), anhydrous cupric chloride (10.8 mg, 0.08 mmol, 20 mol%) were added successively. (If the alkyne substrate was in solid form, it was also added at this stage.) The tube was evacuated and backfilled with argon (this process was repeated for 3 times). Anhydrous MeCN (0.2 mL), liquid alkyne **1** (0.4 mmol, 1.0 equiv.), *N,N,N',N'*-tetramethylethylenediamine (TMEDA, 9.3 mg, 0.08 mmol, 20 mol%), *i*PrOH (0.8 mL) were added successively under argon atmosphere. The reaction mixture was stirred vigorously at 30 °C for 6 h, then oil bath was elevated to 50 °C over approximately 10 minutes and stirred for an additional 3 h. After that, the reaction was diluted with ethyl acetate (4 mL), then saturated aq. sodium bicarbonate (4 mL) was added. The aqueous layer was extracted with EtOAc (3 × 8 mL). The combined organic layer was washed with brine (5 mL), dried over Na<sub>2</sub>SO<sub>4</sub>, filtered, and concentrated under reduced pressure. The crude product was purified by flash chromatography (silica gel, 200~300 mesh) to afford the related *N*-aminooxazol-2-one product.

#### V. Characterization data for the products

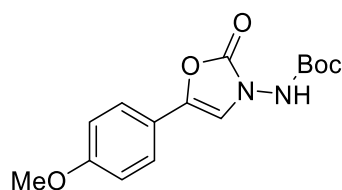

***tert*-Butyl (5-(4-methoxyphenyl)-2-oxooxazol-3(2*H*)-yl)carbamate (**3a**):** The representative procedure was followed using 4-ethynylanisole **1a** (52.8 mg, 0.4 mmol) as a starting material. The crude product was purified by flash chromatography (eluted with petroleum ether/EtOAc = 3:1 (v/v)) to afford **3a** (94.3 mg, 77% yield) as a white solid, m.p. 156.8~158.9 °C. <sup>1</sup>H NMR (400 MHz, DMSO-*d*<sub>6</sub>) δ 10.32-9.72 (m, 1H, -NHCO), 7.65 (s, 1H), 7.46 (d, *J* = 8.4 Hz, 2H), 7.00 (d, *J* = 8.4 Hz, 2H), 3.77 (s, 3H), 1.53-1.32 (m, 9H); <sup>13</sup>C{<sup>1</sup>H} NMR (101 MHz, DMSO-*d*<sub>6</sub>) δ 159.2, 154.2, 152.8, 136.3, 124.2, 119.7, 114.5, 112.3, 81.3, 55.2, 27.9; HRMS (ESI) *m/z*: [*M*

+ Na]<sup>+</sup> Calcd for C<sub>15</sub>H<sub>18</sub>N<sub>2</sub>NaO<sub>5</sub><sup>+</sup> 329.1108, found 329.1107.

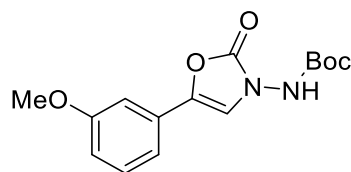

**tert-Butyl (5-(3-methoxyphenyl)-2-oxooxazol-3(2H)-yl)carbamate (3b):** The representative procedure was followed using 3-ethynylanisole **1b** (52.8 mg, 0.4 mmol) as a starting material. The crude product was purified by flash chromatography (eluted with a gradient from 6:1 to 4:1 petroleum ether/EtOAc (v/v)) to afford **3b** (85.3 mg, 70% yield) as a white solid, m.p. 152.1~153.9 °C. <sup>1</sup>H NMR (400 MHz, DMSO-*d*<sub>6</sub>) δ 10.37-9.73 (m, 1H, -NHCO), 7.86 (s, 1H), 7.35 (dd, *J* = 8.0, 8.0 Hz, 1H), 7.15-7.04 (m, 2H), 6.90 (dd, *J* = 8.0, 2.8 Hz, 1H), 3.78 (s, 3H), 1.55-1.31 (m, 9H); <sup>13</sup>C{<sup>1</sup>H} NMR (101 MHz, DMSO-*d*<sub>6</sub>) δ 159.6, 154.2, 152.7, 135.9, 130.2, 128.3, 114.8, 114.6, 114.1, 107.6, 81.4, 55.2, 27.9; HRMS (ESI) *m/z*: [M + Na]<sup>+</sup> Calcd for C<sub>15</sub>H<sub>18</sub>N<sub>2</sub>NaO<sub>5</sub><sup>+</sup> 329.1108, found 329.1107.

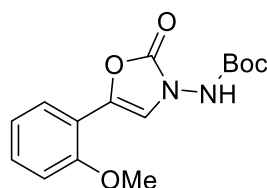

**tert-Butyl (5-(2-methoxyphenyl)-2-oxooxazol-3(2H)-yl)carbamate (3c):** The representative procedure was followed using 2-ethynylanisole **1c** (52.8 mg, 0.4 mmol), The reaction mixture was stirred vigorously at 30 °C for 6 h, then oil bath was elevated to 60 °C over approximately 10 minutes and stirred for an additional 12 h. The crude product was purified by flash chromatography (eluted with a gradient from 5:1 to 3:1 petroleum ether/EtOAc (v/v)) to afford **3c** (100.1 mg, 82% yield) as a white solid, m.p. 171.9~173.8 °C. <sup>1</sup>H NMR (400 MHz, DMSO-*d*<sub>6</sub>) δ 10.30-9.70 (m, 1H, -NHCO), 7.54-7.44 (m, 2H), 7.31 (dd, *J* = 8.0, 8.0 Hz, 1H), 7.10 (d, *J* = 8.0 Hz, 1H), 7.03 (dd, *J* = 8.0, 8.0 Hz, 1H), 3.90 (s, 3H), 1.55-1.31 (m, 9H); <sup>13</sup>C{<sup>1</sup>H} NMR (101 MHz, DMSO-*d*<sub>6</sub>) δ 154.9, 154.1, 152.2, 132.7, 128.9, 123.7, 120.6, 117.4, 115.4, 111.1, 81.2, 55.4, 27.9; HRMS (ESI) *m/z*: [M + Na]<sup>+</sup> Calcd for C<sub>15</sub>H<sub>18</sub>N<sub>2</sub>NaO<sub>5</sub><sup>+</sup> 329.1108, found 329.1106.

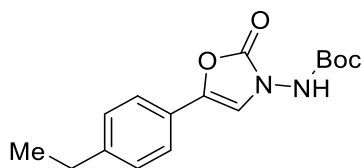

**tert-Butyl (5-(4-ethylphenyl)-2-oxooxazol-3(2H)-yl)carbamate (3d):** The representative procedure was followed using 1-ethyl-4-ethynylbenzene **1d** (52.0 mg, 0.4 mmol) as a starting material. The crude product was purified by flash chromatography (eluted with petroleum ether/EtOAc = 8:1 (v/v)) to afford **3d** (86.4 mg, 71% yield) as a white solid, m.p. 172.8~174.1 °C. <sup>1</sup>H NMR (400 MHz, DMSO-*d*<sub>6</sub>) δ 10.33-9.71 (m, 1H, -NHCO), 7.78 (s, 1H), 7.44 (d, *J* = 8.0 Hz, 2H), 7.27 (d, *J* = 8.0 Hz, 2H), 2.61 (q, *J* = 7.6 Hz, 2H), 1.55-1.31 (m, 9H), 1.17 (t, *J* = 7.6 Hz, 3H); <sup>13</sup>C{<sup>1</sup>H} NMR (101 MHz, DMSO-*d*<sub>6</sub>) δ 154.2, 152.7, 144.0, 136.3, 128.4, 124.6, 122.6, 113.4, 81.3, 27.94, 27.86, 15.4; HRMS (ESI) *m/z*: [M + Na]<sup>+</sup> Calcd for C<sub>16</sub>H<sub>20</sub>N<sub>2</sub>NaO<sub>4</sub><sup>+</sup> 327.1315, found 327.1313.

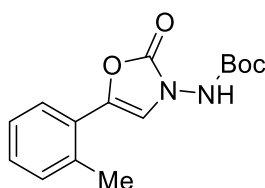

**tert-Butyl (2-oxo-5-(o-tolyl)oxazol-3(2H)-yl)carbamate (3e):** The representative procedure was followed using 1-ethynyl-2-methylbenzene **1e** (46.5 mg, 0.4 mmol), anhydrous cupric chloride (16.1 mg, 0.12 mmol, 30 mol%), TMEDA (13.9 mg, 0.12 mmol, 30 mol%) and DABCO (2.2 mg, 0.02 mol, 0.05 equiv.). The reaction mixture was stirred vigorously at 30 °C for 6 h, then oil bath was heated to 60 °C (this process takes about 10 mins) and stirred for another 12 h. The crude product was purified by flash chromatography (eluted with petroleum ether/EtOAc = 4:1 (v/v)) to afford **3e** (82.4 mg, 71% yield) as a white solid, m.p. 164.8~165.8 °C. <sup>1</sup>H NMR (400 MHz, DMSO-*d*<sub>6</sub>) δ 10.36-9.78 (m, 1H, -NHCO), 7.55 (s, 1H), 7.51 (d, *J* = 6.8 Hz, 1H), 7.34-7.22 (m, 3H), 2.35 (s, 3H), 1.55-1.32 (m, 9H); <sup>13</sup>C{<sup>1</sup>H} NMR (101 MHz, DMSO-*d*<sub>6</sub>) δ 154.1, 152.5, 135.1, 134.0, 131.1, 128.1, 126.3, 126.0, 125.0, 116.8, 81.2, 27.9, 21.2; HRMS (ESI) *m/z*: [M + Na]<sup>+</sup> Calcd for C<sub>15</sub>H<sub>18</sub>N<sub>2</sub>NaO<sub>4</sub><sup>+</sup> 313.1159, found 313.1154.

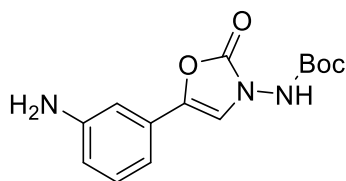

**tert-Butyl (5-(3-aminophenyl)-2-oxooxazol-3(2H)-yl)carbamate (3f):** The representative procedure was followed using 3-ethynylaniline **1f** (46.9 mg, 0.4 mmol) as a starting material. The crude product was purified by flash chromatography (eluted with petroleum ether/EtOAc = 2:1 (v/v)) to afford **3f** (63.1 mg, 54% yield) as a white solid, m.p. 181.8~182.9 °C.  $^1\text{H}$  NMR (400 MHz, DMSO- $d_6$ )  $\delta$  10.35-9.89 (m, 1H, -NHCO), 7.65 (s, 1H), 7.05 (dd,  $J$  = 7.6, 7.6 Hz, 1H), 6.77-6.63 (m, 2H), 6.51 (dd,  $J$  = 7.6, 2.0 Hz, 1H), 5.26 (s, 2H, -NH $_2$ ), 1.56-1.31 (m, 9H);  $^{13}\text{C}\{^1\text{H}\}$  NMR (101 MHz, DMSO- $d_6$ )  $\delta$  154.1, 152.8, 149.0, 136.7, 129.5, 127.5, 113.8, 113.4, 110.3, 107.7, 81.2, 27.9; HRMS (ESI)  $m/z$ :  $[\text{M} + \text{Na}]^+$  Calcd for  $\text{C}_{14}\text{H}_{17}\text{N}_3\text{NaO}_4^+$  314.1111, found 314.1107.

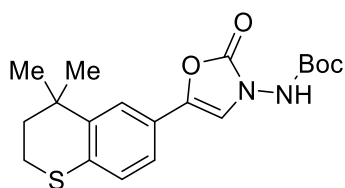

**tert-Butyl (5-(4,4-dimethylthiochroman-6-yl)-2-oxooxazol-3(2H)-yl)carbamate (3g):** The representative procedure was followed using 6-ethynyl-4,4-dimethylthiochromane **1g** (80.8 mg, 0.4 mmol) as a starting material. The crude product was purified by flash chromatography (eluted with petroleum ether/EtOAc = 8:1 (v/v)) to afford **3g** (109.9 mg, 73% yield) as a yellow foam.  $^1\text{H}$  NMR (400 MHz, DMSO- $d_6$ )  $\delta$  10.37-9.73 (m, 1H, -NHCO), 7.78 (s, 1H), 7.53 (d,  $J$  = 2.0 Hz, 1H), 7.18 (dd,  $J$  = 8.4, 2.0 Hz, 1H), 7.09 (d,  $J$  = 8.4 Hz, 1H), 3.12-2.97 (m, 2H), 1.95-1.84 (m, 2H), 1.57-1.33 (m, 9H), 1.29 (s, 6H);  $^{13}\text{C}\{^1\text{H}\}$  NMR (101 MHz, DMSO- $d_6$ )  $\delta$  154.2, 152.7, 142.5, 136.2, 132.0, 126.7, 122.9, 120.7, 120.3, 113.2, 81.3, 36.9, 32.8, 29.8, 27.9, 22.3; HRMS (ESI)  $m/z$ :  $[\text{M} + \text{Na}]^+$  Calcd for  $\text{C}_{19}\text{H}_{24}\text{N}_2\text{NaO}_4\text{S}^+$  399.1349, found 399.1344.

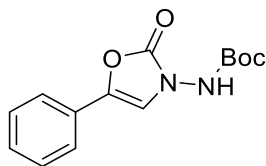

**tert-Butyl (2-oxo-5-phenyloxazol-3(2H)-yl)carbamate (3h):** The representative procedure was followed using phenylacetylene **1h** (40.8 mg, 0.4 mmol) as a starting material. The crude product was purified by flash chromatography (eluted with a gradient from 8:1 to 4:1 petroleum ether/EtOAc (v/v)) to afford **3h** (73.8 mg, 67% yield) as a white solid, m.p. 188.0~188.4 °C. <sup>1</sup>H NMR (400 MHz, DMSO-*d*<sub>6</sub>) δ 10.50-10.00 (m, 1H, -NHCO), 7.84 (s, 1H), 7.53 (d, *J* = 7.2 Hz, 2H), 7.44 (dd, *J* = 7.2, 7.2 Hz, 2H), 7.33 (dd, *J* = 7.2, 7.2 Hz, 1H), 1.57-1.30 (m, 9H); <sup>13</sup>C{<sup>1</sup>H} NMR (101 MHz, DMSO-*d*<sub>6</sub>) δ 154.2, 152.7, 136.0, 129.0, 128.2, 127.0, 122.5, 114.2, 81.3, 27.9; HRMS (ESI) *m/z*: [M + Na]<sup>+</sup> Calcd for C<sub>14</sub>H<sub>16</sub>N<sub>2</sub>NaO<sub>4</sub> 299.1002, found 299.1002.

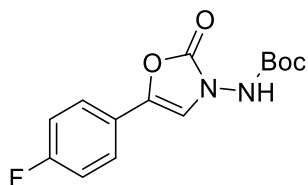

**tert-Butyl (5-(4-fluorophenyl)-2-oxooxazol-3(2H)-yl)carbamate (3i):** The representative procedure was followed using 4-fluorophenylacetylene **1i** (48.0 mg, 0.4 mmol) as a starting material. The crude product was purified by flash chromatography (eluted with petroleum ether/EtOAc = 6:1 (v/v)) to afford **3i** (84.6 mg, 72% yield) as a white solid, m.p. 162.7~164.3 °C. <sup>1</sup>H NMR (400 MHz, DMSO-*d*<sub>6</sub>) δ 10.35-9.76 (m, 1H, -NHCO), 7.81 (s, 1H), 7.62-7.52 (m, 2H), 7.29 (t, *J* = 8.8 Hz, 2H), 1.54-1.30 (m, 9H); <sup>13</sup>C{<sup>1</sup>H} NMR (101 MHz, DMSO-*d*<sub>6</sub>) δ 161.7 (d, *J* = 246.6 Hz), 154.2, 152.7, 135.3, 124.8 (d, *J* = 8.3 Hz), 123.7 (d, *J* = 3.0 Hz), 116.1 (d, *J* = 22.0 Hz), 114.0, 81.4, 27.9; HRMS (ESI) *m/z*: [M + Na]<sup>+</sup> Calcd for C<sub>14</sub>H<sub>15</sub>FN<sub>2</sub>NaO<sub>4</sub><sup>+</sup> 317.0908, found 317.0908.

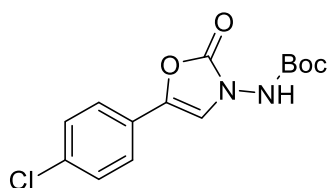



***tert*-Butyl (5-(4-chlorophenyl)-2-oxooxazol-3(2*H*)-yl)carbamate (3j):** The representative procedure was followed using 4-chlorophenylacetylene **1j** (54.6 mg, 0.4 mmol) as a starting material. The crude product was purified by flash chromatography (eluted with a gradient from 8:1 to 4:1 petroleum ether/EtOAc (v/v)) to afford **3j** (78.2 mg, 63% yield) as a white solid. m.p. 149.1~150.1 °C. <sup>1</sup>H NMR (400 MHz, DMSO-*d*<sub>6</sub>) δ 10.38-9.75 (m, 1H, -NHCO), 7.89 (s, 1H), 7.54 (d, *J* = 8.4 Hz, 2H), 7.49 (d, *J* = 8.4 Hz, 2H), 1.56-1.26 (m, 9H); <sup>13</sup>C {<sup>1</sup>H} NMR (101 MHz, DMSO-*d*<sub>6</sub>) δ 154.1, 152.5, 135.1, 132.5, 129.0, 125.9, 124.2, 114.9, 81.4, 27.8; HRMS (ESI) *m/z*: [M + Na]<sup>+</sup> Calcd for C<sub>14</sub>H<sub>15</sub>ClN<sub>2</sub>NaO<sub>4</sub><sup>+</sup> 333.0613, found 333.0613.

**X-Ray structure of 3j (CCDC 2488345)**

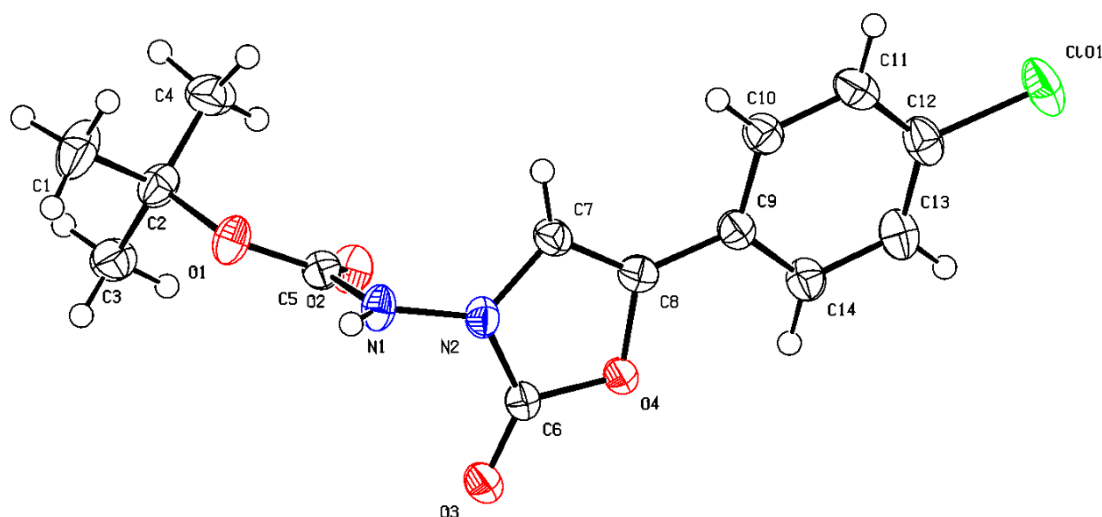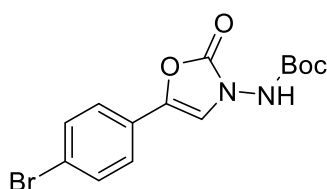

***tert*-Butyl (5-(4-bromophenyl)-2-oxooxazol-3(2*H*)-yl)carbamate (3k):** The representative procedure was followed using 4-bromophenylacetylene **1k** (72.4 mg, 0.4 mmol) as a starting material. The crude product was purified by flash chromatography (eluted with petroleum ether/EtOAc = 4:1 (v/v)) to afford **3k** (77.5 mg, 55% yield) as a white solid, m.p. 192.6~193.0 °C. <sup>1</sup>H NMR (400 MHz, DMSO-*d*<sub>6</sub>) δ 10.40-9.74 (m, 1H, -NHCO), 7.92 (s, 1H), 7.63 (d, *J* =

8.4 Hz, 2H), 7.47 (d,  $J$  = 8.4 Hz, 2H), 1.56-1.30 (m, 9H);  $^{13}\text{C}\{^1\text{H}\}$  NMR (101 MHz, DMSO- $d_6$ )  $\delta$  154.1, 152.5, 135.1, 131.9, 126.2, 124.4, 121.0, 115.0, 81.4, 27.8; HRMS (ESI)  $m/z$ :  $[\text{M} + \text{Na}]^+$  Calcd for  $\text{C}_{14}\text{H}_{15}\text{BrN}_2\text{NaO}_4^+$  377.0107, found 377.0102.

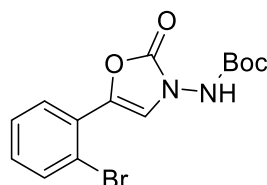

**tert-Butyl (5-(2-bromophenyl)-2-oxooxazol-3(2H)-yl)carbamate (3l):** The representative procedure was followed using 2-bromophenylacetylene **1l** (72.4 mg, 0.4 mmol), anhydrous cupric chloride (16.1 mg, 0.12 mmol, 30 mol%), TMEDA (13.9 mg, 0.12 mmol, 30 mol%) and DABCO (2.2 mg, 0.02 mol, 0.05 equiv.). The reaction mixture was stirred vigorously at 30 °C for 6 h, then oil bath was heated to 60 °C (this process takes about 10 mins) and stirred for another 12 h. The crude product was purified by flash chromatography (eluted with petroleum ether/EtOAc = 6:1 (v/v)) to afford **3l** (89.8 mg, 63% yield) as a white solid, m.p. 149.1~150.1 °C.  $^1\text{H}$  NMR (400 MHz, DMSO- $d_6$ )  $\delta$  10.41-9.81 (m, 1H, -NHCO), 7.89 (s, 1H), 7.73 (d,  $J$  = 8.0 Hz, 1H), 7.62 (d,  $J$  = 8.0 Hz, 1H), 7.49 (dd,  $J$  = 8.0, 8.0 Hz, 1H), 7.30 (dd,  $J$  = 8.0, 8.0 Hz, 1H), 1.57-1.33 (m, 9H);  $^{13}\text{C}\{^1\text{H}\}$  NMR (101 MHz, DMSO- $d_6$ )  $\delta$  154.1, 152.1, 134.0, 133.7, 129.9, 128.1, 127.6, 127.0, 118.2, 81.3, 27.9; HRMS (ESI)  $m/z$ :  $[\text{M} + \text{Na}]^+$  Calcd for  $\text{C}_{14}\text{H}_{15}\text{BrN}_2\text{NaO}_4^+$  377.0107, found 377.0105.

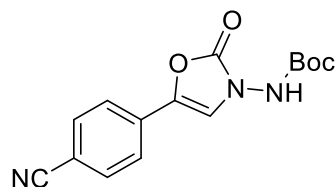

**tert-Butyl (5-(4-cyanophenyl)-2-oxooxazol-3(2H)-yl)carbamate (3m):** The representative procedure was followed using 4-ethynylbenzonitrile **1m** (50.9 mg, 0.4 mmol) as a starting material. The crude product was purified by flash chromatography (eluted with petroleum ether/EtOAc = 3:1 (v/v)) to afford **3m** (72.3 mg, 60% yield) as a white solid, m.p. 170.5~171.1 °C.  $^1\text{H}$  NMR (400 MHz, DMSO- $d_6$ )  $\delta$  10.46-9.87 (m, 1H, -NHCO), 8.14 (s, 1H), 7.89 (d,  $J$  =

8.4 Hz, 2H), 7.68 (d,  $J = 8.4$  Hz, 2H), 1.54-1.29 (m, 9H);  $^{13}\text{C}\{^1\text{H}\}$  NMR (101 MHz, DMSO- $d_6$ )  $\delta$  154.1, 152.4, 134.5, 133.0, 131.2, 122.9, 118.6, 117.6, 110.0, 81.6, 27.8; HRMS (ESI)  $m/z$ :  $[\text{M} + \text{Na}]^+$  Calcd for  $\text{C}_{15}\text{H}_{15}\text{N}_3\text{NaO}_4^+$  324.0955, found 324.0951.

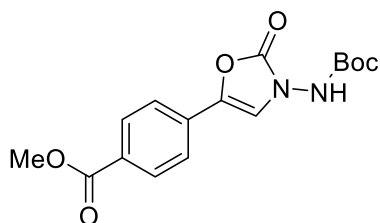

**Methyl 4-(3-((*tert*-butoxycarbonyl)amino)-2-oxo-2,3-dihydrooxazol-5-yl)benzoate (3n):**

The representative procedure was followed using 4-ethynylbenzoate **1n** (64.1 mg, 0.4 mmol) as a starting material. The crude product was purified by flash chromatography (eluted with petroleum ether/EtOAc = 1:1 (v/v)) to afford **3n** (85.9 mg, 64% yield) as a white solid, m.p. 258.2~260.2 °C.  $^1\text{H}$  NMR (400 MHz, DMSO- $d_6$ )  $\delta$  10.44-9.81 (m, 1H, -NHCO), 8.08 (s, 1H), 8.00 (d,  $J = 8.4$  Hz, 2H), 7.65 (d,  $J = 8.4$  Hz, 2H), 3.85 (s, 3H), 1.57-1.32 (m, 9H);  $^{13}\text{C}\{^1\text{H}\}$  NMR (101 MHz, DMSO- $d_6$ )  $\delta$  165.7, 154.1, 152.5, 135.1, 131.2, 129.9, 128.6, 122.5, 116.8, 81.5, 52.2, 27.8; HRMS (ESI)  $m/z$ :  $[\text{M} + \text{Na}]^+$  Calcd for  $\text{C}_{16}\text{H}_{18}\text{N}_2\text{NaO}_6^+$  357.1057, found 357.1054.

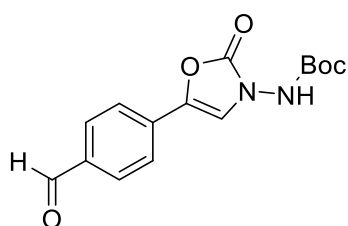

***tert*-Butyl (5-(4-formylphenyl)-2-oxooxazol-3(2H)-yl)carbamate (3o):** The representative procedure was followed using 4-ethynylbenzaldehyde **1o** (52.1 mg, 0.4 mmol) as a starting material. The crude product was purified by flash chromatography (eluted with a gradient from 3:1 to 2.5:1 petroleum ether/EtOAc (v/v)) to afford **3o** (59.6 mg, 49% yield) as an orange solid, m.p. 187.5~188.0 °C.  $^1\text{H}$  NMR (400 MHz, DMSO- $d_6$ )  $\delta$  10.45-9.88 (m, 1H, -NHCO), 9.98 (s, 1H), 8.13 (s, 1H), 7.96 (d,  $J = 8.4$  Hz, 2H), 7.73 (d,  $J = 8.4$  Hz, 2H), 1.55-1.30 (m, 9H);  $^{13}\text{C}\{^1\text{H}\}$

NMR (101 MHz, DMSO-*d*<sub>6</sub>)  $\delta$  192.2, 154.1, 152.4, 135.2, 135.0, 132.2, 130.3, 122.8, 117.3, 81.5, 27.8; HRMS (ESI) *m/z*: [M + Na]<sup>+</sup> Calcd for C<sub>15</sub>H<sub>16</sub>N<sub>2</sub>NaO<sub>5</sub><sup>+</sup> 327.0951, found 327.0948.

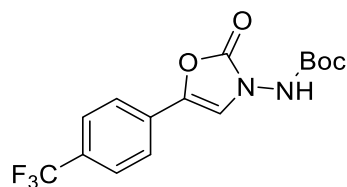

***tert*-Butyl (2-oxo-5-(4-(trifluoromethyl)phenyl)oxazol-3(2*H*)-yl)carbamate (3p):** The representative procedure was followed using 4-(trifluoromethyl)phenylacetylene **1p** (68.0 mg, 0.4 mmol) as a starting material. The crude product was purified by flash chromatography (eluted with a gradient from 8:1 to 4:1 petroleum ether/EtOAc (v/v)) to afford **3p** (89.4 mg, 65% yield) as a white solid, m.p. 183.0~183.6 °C. <sup>1</sup>H NMR (400 MHz, DMSO-*d*<sub>6</sub>)  $\delta$  10.54-9.85 (m, 1H, -NHCO), 8.10 (s, 1H), 7.79 (d, *J* = 8.4 Hz, 2H), 7.72 (d, *J* = 8.4 Hz, 2H), 1.56-1.31 (m, 9H); <sup>13</sup>C{<sup>1</sup>H} NMR (101 MHz, DMSO-*d*<sub>6</sub>)  $\delta$  154.1, 152.5, 134.7, 130.8, 128.0 (q, *J* = 32.0 Hz), 126.0 (q, *J* = 3.8 Hz), 124.1 (q, *J* = 273.4 Hz), 123.0, 116.7, 81.5, 27.8; HRMS (ESI) *m/z*: [M + Na]<sup>+</sup> Calcd for C<sub>15</sub>H<sub>15</sub>F<sub>3</sub>N<sub>2</sub>NaO<sub>4</sub><sup>+</sup> 367.0876, found 367.0876.

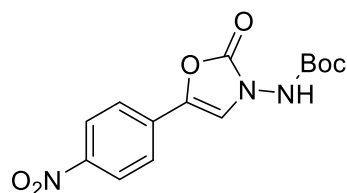

***tert*-Butyl (5-(4-nitrophenyl)-2-oxooxazol-3(2*H*)-yl)carbamate (3q):** The representative procedure was followed using 4-nitrophenylacetylene **1q** (58.8 mg, 0.4 mmol) as a starting material. The crude product was purified by flash chromatography (eluted with petroleum ether/EtOAc = 3:1 (v/v)) to afford **3q** (65.7 mg, 51% yield) as a yellow solid, m.p. 267.8~268.9 °C. <sup>1</sup>H NMR (400 MHz, DMSO-*d*<sub>6</sub>)  $\delta$  10.53-9.92 (m, 1H, -NHCO), 8.28 (d, *J* = 8.8 Hz, 2H), 8.23 (s, 1H), 7.75 (d, *J* = 8.8 Hz, 2H), 1.57-1.31 (m, 9H); <sup>13</sup>C{<sup>1</sup>H} NMR (101 MHz, DMSO-*d*<sub>6</sub>)  $\delta$  154.1, 152.3, 146.3, 134.3, 133.0, 124.5, 123.2, 118.4, 81.6, 27.8; HRMS (ESI) *m/z*: [M + Na]<sup>+</sup> Calcd for C<sub>14</sub>H<sub>15</sub>N<sub>3</sub>NaO<sub>6</sub><sup>+</sup> 344.0853, found 344.0853.

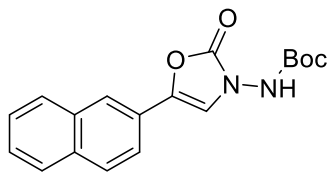

**tert-Butyl (5-(naphthalen-2-yl)-2-oxooxazol-3(2H)-yl)carbamate (3r):** The representative procedure was followed using 2-ethynylnaphthalene **1r** (60.9 mg, 0.4 mmol) as a starting material. Upon completion, the reaction mixture was filtered through a short silica gel pad, and eluted with EtOAc. The combined filtrates were concentrated under reduced pressure. The crude product was then triturated with petroleum ether/EtOAc = 80:5 (v/v) to afford **3r** (77.9 mg, 60% yield) as a white solid, m.p. 204.7~205.4 °C.  $^1\text{H}$  NMR (400 MHz, DMSO- $d_6$ )  $\delta$  10.39-9.84 (m, 1H, -NHCO), 8.02 (s, 1H), 8.00-7.94 (m, 3H), 7.93-7.88 (m, 1H), 7.68 (dd,  $J$  = 8.4, 1.6 Hz, 1H), 7.58-7.48 (m, 2H), 1.57-1.33 (m, 9H);  $^{13}\text{C}\{^1\text{H}\}$  NMR (101 MHz, DMSO- $d_6$ )  $\delta$  154.2, 152.7, 136.2, 132.9, 132.4, 128.7, 128.1, 127.7, 126.9, 126.5, 124.4, 120.9, 120.6, 114.9, 81.4, 27.9; HRMS (ESI)  $m/z$ :  $[\text{M} + \text{Na}]^+$  Calcd for  $\text{C}_{18}\text{H}_{18}\text{N}_2\text{NaO}_4^+$  349.1159, found 349.1154.

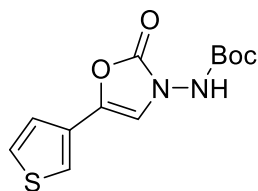

**tert-Butyl (2-oxo-5-(thiophen-3-yl)oxazol-3(2H)-yl)carbamate (3s):** The representative procedure was followed using 3-ethynylthiophene **1s** (43.3 mg, 0.4 mmol) as a starting material. The crude product was purified by flash chromatography (eluted with petroleum ether/EtOAc = 5:1 (v/v)) to afford **3s** (87.1 mg, 78% yield) as a white solid, m.p. 170.4~171.7 °C.  $^1\text{H}$  NMR (400 MHz, DMSO- $d_6$ )  $\delta$  10.30-9.73 (m, 1H, -NHCO), 7.71-7.60 (m, 3H), 7.31 (dd,  $J$  = 4.8, 1.2 Hz, 1H), 1.54-1.31 (m, 9H);  $^{13}\text{C}\{^1\text{H}\}$  NMR (101 MHz, DMSO- $d_6$ )  $\delta$  154.2, 152.6, 133.9, 128.14, 128.10, 123.4, 120.1, 113.3, 81.3, 27.9; HRMS (ESI)  $m/z$ :  $[\text{M} + \text{Na}]^+$  Calcd for  $\text{C}_{12}\text{H}_{14}\text{N}_2\text{NaO}_4\text{S}^+$  305.0566 found 305.0566.

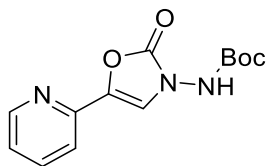

**tert-Butyl (2-oxo-5-(pyridin-2-yl)oxazol-3(2H)-yl)carbamate (3t):** The representative procedure was followed using 2-ethynylpyridine **1t** (41.2 mg, 0.4 mmol) as a starting material. The crude product was purified by flash chromatography (eluted with petroleum ether/EtOAc = 2:1 (v/v)) to afford **3t** (51.8 mg, 50% yield) as a slightly yellow solid, m.p. 195.8~196.9 °C.  $^1\text{H}$  NMR (400 MHz, DMSO- $d_6$ )  $\delta$  10.36-9.81 (m, 1H, -NHCO), 8.57 (d,  $J$  = 4.8 Hz, 1H), 7.93 (s, 1H), 7.87 (ddd,  $J$  = 7.6, 7.6, 1.6 Hz, 1H), 7.52 (d,  $J$  = 7.6 Hz, 1H), 7.32 (ddd,  $J$  = 7.6, 4.8, 1.6 Hz, 1H), 1.54-1.27 (m, 9H);  $^{13}\text{C}\{^1\text{H}\}$  NMR (101 MHz, DMSO- $d_6$ )  $\delta$  154.1, 152.6, 149.8, 145.9, 137.2, 135.8, 123.0, 117.8, 117.2, 81.4, 27.9; HRMS (ESI)  $m/z$ :  $[\text{M} + \text{Na}]^+$  Calcd for  $\text{C}_{13}\text{H}_{15}\text{N}_3\text{NaO}_4^+$  300.0955, found 300.0956.

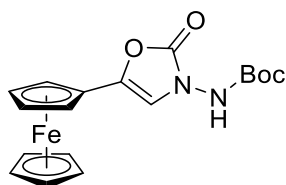

**tert-Butyl (2-oxo-5-ferrocenyloxazol-3(2H)-yl)carbamate (3u):** The representative procedure was followed using ethynylferrocene **1u** (84.0 mg, 0.4 mmol) as a starting material. The crude product was purified by flash chromatography (eluted with a gradient from 6:1 to 4:1 petroleum ether/EtOAc (v/v)) to afford **3u** (89.9 mg, 59% yield) as an orange solid, m.p. 201.3~202.0 °C.  $^1\text{H}$  NMR (400 MHz, DMSO- $d_6$ )  $\delta$  10.18-9.61 (m, 1H, -NHCO), 7.23 (s, 1H), 4.56 (br s, 2H), 4.34 (br s, 2H), 4.16 (br s, 5H), 3.77 (s, 3H), 1.55-1.33 (m, 9H);  $^{13}\text{C}\{^1\text{H}\}$  NMR (101 MHz, DMSO- $d_6$ )  $\delta$  154.1, 153.0, 136.2, 111.6, 81.1, 72.5, 69.3, 68.7, 64.7, 27.8; HRMS (ESI)  $m/z$ :  $[\text{M} + \text{Na}]^+$  Calcd for  $\text{C}_{18}\text{H}_{20}\text{FeN}_2\text{NaO}_4^+$  407.0665, found 407.0669.

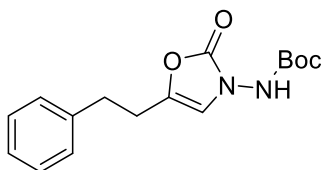

***tert*-Butyl (2-oxo-5-phenethyloxazol-3(2*H*)-yl)carbamate (3v):** The representative procedure was followed using but-3-yn-1-ylbenzene **1v** (52.1 mg, 0.4 mmol) as a starting material. The crude product was purified by flash chromatography (eluted with a gradient from 6:1 to 5:1 petroleum ether/EtOAc (v/v)) to afford **3v** (67.1 mg, 55% yield) as a white solid, m.p. 136.0~137.0 °C. <sup>1</sup>H NMR (400 MHz, DMSO-*d*<sub>6</sub>) δ 10.04-9.51 (m, 1H, -NHCO), 7.34-7.15 (m, 5H), 6.85 (s, 1H), 2.81 (t, *J* = 7.2 Hz, 2H), 2.67 (t, *J* = 7.2 Hz, 2H), 1.51-1.28 (m, 9H); <sup>13</sup>C{<sup>1</sup>H} NMR (101 MHz, DMSO-*d*<sub>6</sub>) δ 154.1, 153.4, 140.3, 137.5, 128.4, 128.3, 126.2, 113.9, 81.0, 31.8, 27.9, 27.1; HRMS (ESI) *m/z*: [M + Na]<sup>+</sup> Calcd for C<sub>16</sub>H<sub>20</sub>N<sub>2</sub>NaO<sub>4</sub><sup>+</sup> 327.1315, found 327.1312.

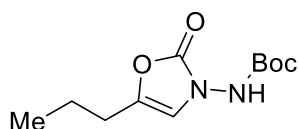

***tert*-Butyl (2-oxo-5-propyloxazol-3(2*H*)-yl)carbamate (3w):** The representative procedure was followed using pent-1-yne **1w** (68.1 mg, 1.0 mmol), DBAD (345.4 mg, 1.5 mmol, 1.5 equiv.), DABCO (5.8 mg, 0.05 mmol, 0.05 equiv.), anhydrous cupric chloride (26.9 mg, 0.2 mmol, 20 mol%), TMEDA (23.2 mg, 0.2 mmol, 20 mol%) in anhydrous MeCN (0.4 mL) and *i*-PrOH (1.6 mL). The crude product was purified by flash chromatography (eluted with petroleum ether/EtOAc = 6:1 (v/v)) to afford **3w** (116.2 mg, 48% yield) as a white solid, m.p. 95.8~96.7 °C. <sup>1</sup>H NMR (400 MHz, DMSO-*d*<sub>6</sub>) δ 10.03-9.50 (m, 1H, -NHCO), 6.87 (s, 1H), 2.32 (dt, *J* = 7.6, 1.2 Hz, 2H), 1.50 (dq, *J* = 7.6, 7.6 Hz, 2H), 1.46-1.32 (m, 9H), 0.90 (t, *J* = 7.6 Hz, 3H); <sup>13</sup>C{<sup>1</sup>H} NMR (101 MHz, DMSO-*d*<sub>6</sub>) δ 154.1, 153.5, 138.0, 113.7, 80.9, 27.9, 27.1, 19.3, 13.2; HRMS (ESI) *m/z*: [M + Na]<sup>+</sup> Calcd for C<sub>11</sub>H<sub>18</sub>N<sub>2</sub>NaO<sub>4</sub><sup>+</sup> 265.1159, found 265.1155.

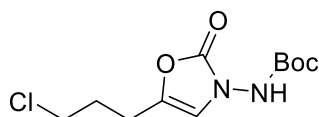

***tert*-Butyl (5-(3-chloropropyl)-2-oxooxazol-3(2*H*)-yl)carbamate (3x):** The representative procedure was followed using 5-chloropent-1-yne **1x** (41.0 mg, 0.4 mmol) as a starting material. The crude product was purified by flash chromatography (eluted with petroleum ether/EtOAc = 6:1 (v/v)) to afford **3x** (54.3 mg, 49% yield) as a white solid, m.p. 119.0~120.3 °C. <sup>1</sup>H NMR

(400 MHz, DMSO-*d*<sub>6</sub>)  $\delta$  10.12-9.55 (m, 1H, -NHCO), 6.96 (s, 1H), 3.67 (t, *J* = 6.4 Hz, 2H), 2.56-2.47 (m, 2H), 1.94 (tt, *J* = 6.4, 6.4 Hz, 2H), 1.50-1.31 (m, 9H); <sup>13</sup>C{<sup>1</sup>H} NMR (101 MHz, DMSO-*d*<sub>6</sub>)  $\delta$  154.2, 153.4, 136.9, 114.1, 81.0, 44.3, 29.0, 27.9, 22.7; HRMS (ESI) *m/z*: [M + Na]<sup>+</sup> Calcd for C<sub>11</sub>H<sub>17</sub>ClN<sub>2</sub>NaO<sub>4</sub><sup>+</sup> 299.0769, found 299.0770.

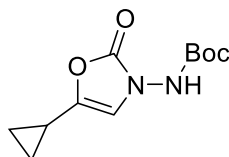

**tert-Butyl (5-cyclopropyl-2-oxooxazol-3(2H)-yl)carbamate (3y):** The representative procedure was followed using cyclopropyl acetylene **1y** (26.4 mg, 0.4 mmol), The crude product was purified by flash chromatography (eluted with petroleum ether/EtOAc = 6:1 (v/v)) to afford **3y** (59.8 mg, 62% yield) as a white solid, m.p. 135.0~136.3 °C. <sup>1</sup>H NMR (400 MHz, DMSO-*d*<sub>6</sub>)  $\delta$  10.09-9.50 (m, 1H, -NHCO), 6.89 (d, *J* = 1.2 Hz, 1H), 1.74-1.63 (m, 1H), 1.48-1.31 (m, 9H), 0.86-0.76 (m, 2H), 0.67-0.56 (m, 2H); <sup>13</sup>C{<sup>1</sup>H} NMR (101 MHz, DMSO-*d*<sub>6</sub>)  $\delta$  154.1, 153.3, 139.7, 112.9, 81.0, 27.9, 6.2, 5.0; HRMS (ESI) *m/z*: [M + Na]<sup>+</sup> Calcd for C<sub>11</sub>H<sub>16</sub>N<sub>2</sub>NaO<sub>4</sub><sup>+</sup> 263.1002, found 263.0999.

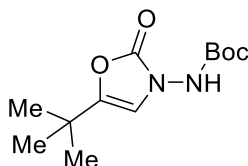

**tert-Butyl (5-(tert-butyl)-2-oxooxazol-3(2H)-yl)carbamate (3z):** The representative procedure was followed using 3,3-dimethylbut-1-yne **1z** (82.1 mg, 1.0 mmol), DBAD (345.4 mg, 1.5 mmol, 1.5 equiv.), DABCO (5.8 mg, 0.05 mmol, 0.05 equiv.), anhydrous cupric chloride (26.9 mg, 0.2 mmol, 20 mol%), TMEDA (23.2 mg, 0.2 mmol, 20 mol%) in anhydrous MeCN (0.4 mL) and *i*PrOH (1.6 mL). The crude product was purified by flash chromatography (eluted with petroleum ether/EtOAc = 4:1 (v/v)) to afford **3z** (129.6 mg, 51% yield) as a white solid, m.p. 169.7~170.8 °C. <sup>1</sup>H NMR (400 MHz, DMSO-*d*<sub>6</sub>)  $\delta$  10.05-9.52 (m, 1H, -NHCO), 6.84 (s, 1H), 1.50-1.30 (m, 9H), 1.14 (s, 9H); <sup>13</sup>C{<sup>1</sup>H} NMR (101 MHz, DMSO-*d*<sub>6</sub>)  $\delta$  154.1,



153.4, 145.5, 111.2, 80.9, 30.8, 27.9, 27.2; HRMS (ESI)  $m/z$ :  $[M + Na]^+$  Calcd for  $C_{12}H_{20}N_2NaO_4^+$  279.1315, found 279.1318.

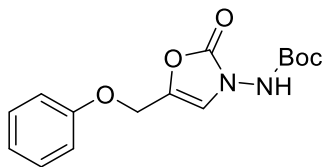

***tert*-Butyl (2-oxo-5-(phenoxy)methyl)oxazol-3(2*H*)-yl)carbamate (**3aa**):** The representative procedure was followed using (prop-2-yn-1-yloxy)benzene **1aa** (52.8 mg, 0.4 mmol) as a starting material. The crude product was purified by flash chromatography (eluted with petroleum ether/EtOAc = 3:1 (v/v)) to afford **3aa** (64.9mg, 53% yield) as a white solid, m.p. 120.1~122.6 °C.  $^1H$  NMR (400 MHz, DMSO- $d_6$ )  $\delta$  10.24-9.65 (m, 1H, -NHCO), 7.42 (s, 1H), 7.31 (dd,  $J$  = 7.6, 7.6 Hz, 2H), 7.01 (d,  $J$  = 7.6 Hz, 2H), 6.97 (dd,  $J$  = 7.6, 7.6 Hz, 1H), 4.86 (s, 2H), 1.56-1.24 (m, 9H);  $^{13}C\{^1H\}$  NMR (101 MHz, DMSO- $d_6$ )  $\delta$  157.6, 154.1, 153.1, 133.2, 129.6, 121.2, 118.9, 114.8, 81.3, 59.9, 27.8; HRMS (ESI)  $m/z$ :  $[M + Na]^+$  Calcd for  $C_{15}H_{18}N_2NaO_5^+$  329.1108, found 329.1112.

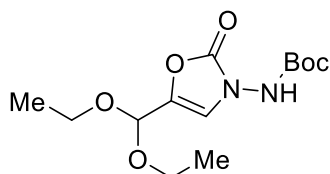

***tert*-Butyl (5-(diethoxymethyl)-2-oxooxazol-3(2*H*)-yl)carbamate (**3ab**):** The representative procedure was followed using 3,3-diethoxyprop-1-yne **1ab** (51.3 mg, 0.4 mmol) as a starting material. The crude product was purified by flash chromatography (eluted with a gradient from 6:1 to 4:1 petroleum ether/EtOAc (v/v)) to afford **3ab** (46.4 mg, 38% yield) as a colorless sticky.  $^1H$  NMR (400 MHz, DMSO- $d_6$ )  $\delta$  10.17-9.62 (m, 1H, -NHCO), 7.20 (s, 1H), 5.34 (s, 1H), 3.63-3.46 (m, 4H), 1.51-1.31 (m, 9H), 1.14 (t,  $J$  = 6.8 Hz, 6H);  $^{13}C\{^1H\}$  NMR (101 MHz, DMSO- $d_6$ )  $\delta$  154.1, 153.0, 134.1, 116.8, 94.2, 81.1, 61.3, 27.9, 15.0; HRMS (ESI)  $m/z$ :  $[M + Na]^+$  Calcd for  $C_{13}H_{22}N_2NaO_6^+$  325.1370, found 325.1368.

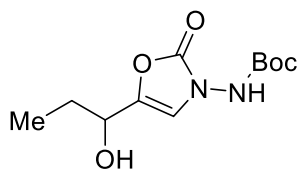

**tert-Butyl (5-(1-hydroxypropyl)-2-oxooxazol-3(2H)-yl)carbamate (3ac):** The representative procedure was followed using pent-1-yn-3-ol **1ac** (33.6 mg, 0.4 mmol) as a starting material. The crude product was purified by flash chromatography (eluted with petroleum ether/EtOAc = 1.5:1 (v/v)) to afford ( $\pm$ )-**3ac** (46.3 mg, 45% yield) as a white solid, m.p. 131.7~133.0 °C.  $^1\text{H}$  NMR (400 MHz, DMSO- $d_6$ )  $\delta$  10.12-9.53 (m, 1H, -NHCO), 7.00 (s, 1H), 5.39 (d,  $J$  = 6.0 Hz, 1H, -OH), 4.15 (dt,  $J$  = 6.0, 6.0 Hz, 1H), 1.69-1.52 (m, 2H), 1.51-1.30 (m, 9H), 0.85 (t,  $J$  = 6.0 Hz, 3H);  $^{13}\text{C}\{^1\text{H}\}$  NMR (101 MHz, DMSO- $d_6$ )  $\delta$  154.2, 153.4, 140.0, 114.2, 81.0, 65.6, 27.9, 26.9, 9.8; HRMS (ESI)  $m/z$ :  $[\text{M} + \text{Na}]^+$  Calcd for  $\text{C}_{11}\text{H}_{18}\text{N}_2\text{NaO}_5^+$  281.1108, found 281.1107.

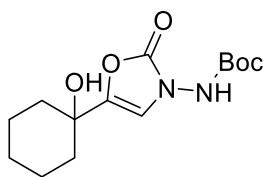

**tert-Butyl (5-(1-hydroxycyclohexyl)-2-oxooxazol-3(2H)-yl)carbamate (3ad):** The representative procedure was followed using 1-ethynylcyclohexan-1-ol **1ad** (49.7 mg, 0.4 mmol) as a starting material. The crude product was purified by flash chromatography (eluted with petroleum ether/EtOAc = 2:1 (v/v)) to afford **3ad** (71.8 mg, 61% yield) as a white solid, m.p. 160.6~162.1 °C.  $^1\text{H}$  NMR (400 MHz, DMSO- $d_6$ )  $\delta$  10.09-9.57 (m, 1H, -NHCO), 6.96 (s, 1H), 5.08 (s, 1H, -OH), 1.76-1.19 (m, 19H);  $^{13}\text{C}\{^1\text{H}\}$  NMR (101 MHz, DMSO- $d_6$ )  $\delta$  154.1, 153.3, 143.3, 112.8, 81.0, 67.0, 34.8, 27.9, 25.1, 21.3; HRMS (ESI)  $m/z$ :  $[\text{M} + \text{Na}]^+$  Calcd for  $\text{C}_{14}\text{H}_{22}\text{N}_2\text{NaO}_5^+$  321.1421, found 321.1420.

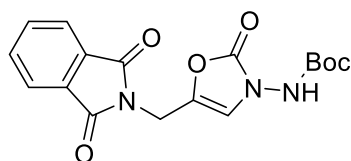

***tert*-Butyl (5-((1,3-dioxoisindolin-2-yl)methyl)-2-oxooxazol-3(2*H*)-yl)carbamate (3ae):**

The representative procedure was followed using N-propargylphthalimide **1ae** (74.1 mg, 0.4 mmol) as a starting material. The crude product was purified by flash chromatography (eluted with petroleum ether/EtOAc = 2:1 (v/v)) to afford **3ae** (71.9 mg, 50% yield) as a white solid, m.p. 192.1~193.0 °C. <sup>1</sup>H NMR (400 MHz, DMSO-*d*<sub>6</sub>) δ 10.20-9.58 (m, 1H, -NHCO), 7.98-7.78 (m, 4H), 7.29 (s, 1H), 4.56 (s, 2H), 1.54-1.16 (m, 9H); <sup>13</sup>C{<sup>1</sup>H} NMR (101 MHz, DMSO-*d*<sub>6</sub>) δ 167.1, 154.0, 153.0, 134.6, 132.4, 131.5, 123.3, 116.6, 81.1, 32.6, 27.8; HRMS (ESI) *m/z*: [M + Na]<sup>+</sup> Calcd for C<sub>17</sub>H<sub>17</sub>N<sub>3</sub>NaO<sub>6</sub><sup>+</sup> 382.1010, found 382.1008.

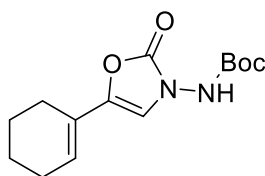

***tert*-Butyl (5-(cyclohex-1-en-1-yl)-2-oxooxazol-3(2*H*)-yl)carbamate (3af):**

The representative procedure was followed using 1-ethynylcyclohexene **1af** (106.2 mg, 1.0 mmol), DBAD (345.4 mg, 1.5 mmol, 1.5 equiv.), DABCO (5.8 mg, 0.05 mmol, 0.05 equiv.), anhydrous cupric chloride (26.9 mg, 0.2 mmol, 20mol%), TMEDA (23.2 mg, 0.2 mmol, 20mol%) in anhydrous MeCN (0.4 mL) and <sup>t</sup>PrOH (1.6 mL). The crude product was purified by flash chromatography (eluted with a gradient from 8:1 to 6:1 petroleum ether/EtOAc (v/v)) to afford **3af** (167.4 mg, 60% yield) as a white solid, m.p. 146.2~147.1 °C. <sup>1</sup>H NMR (400 MHz, DMSO-*d*<sub>6</sub>) δ 10.22-9.61 (m, 1H, -NHCO), 7.16 (s, 1H), 6.03-5.92 (m, 1H), 2.21-2.08 (m, 2H), 2.08-1.97 (m, 2H), 1.69-1.52 (m, 4H), 1.50-1.30 (m, 9H); <sup>13</sup>C{<sup>1</sup>H} NMR (101 MHz, DMSO-*d*<sub>6</sub>) δ 154.1, 152.7, 137.3, 123.8, 122.5, 112.5, 81.1, 27.9, 24.4, 22.7, 21.6, 21.4; HRMS (ESI) *m/z*: [M + Na]<sup>+</sup> Calcd for C<sub>14</sub>H<sub>20</sub>N<sub>2</sub>NaO<sub>4</sub><sup>+</sup> 303.1315, found 303.1314.

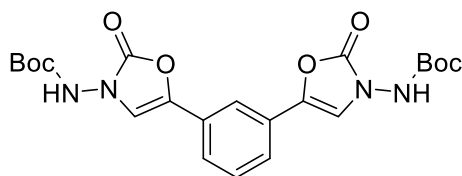

**Di-*tert*-butyl (1,3-phenylenebis(2-oxooxazole-5,3(2*H*)-diyl))dicarbamate (3ag):**

The representative procedure was followed using 1,3-diethynylbenzene **1ag** (50.5 mg, 0.4 mmol),

DBAD (276.3 mg, 1.2 mmol, 3.0 equiv.), DABCO (2.2 mg, 0.02 mmol, 0.05 equiv.), anhydrous cupric chloride (10.8 mg, 0.08 mmol, 20 mol%), TMEDA (9.3 mg, 0.08 mmol, 20 mol%) in anhydrous MeCN (0.2 mL) and *i*PrOH (0.8 mL). The reaction mixture was stirred vigorously at 30 °C overnight (ca. 15 h), then oil bath was heated to 50 °C and stirred for another 6 h. The crude product was purified by flash chromatography (eluted with petroleum ether/EtOAc = 1:1 (v/v)) to afford **3ag** (79.7 mg, 42% yield) as a white solid, m.p. >300 °C. <sup>1</sup>H NMR (400 MHz, DMSO-*d*<sub>6</sub>) δ 10.41-9.78 (m, 2H, -NHCO), 7.93 (s, 2H), 7.67 (s, 1H), 7.55-7.44 (m, 3H), 1.57-1.31 (m, 18H); <sup>13</sup>C{<sup>1</sup>H} NMR (101 MHz, DMSO-*d*<sub>6</sub>) δ 154.1, 152.6, 135.4, 129.7, 127.8, 122.0, 116.3, 115.1, 81.4, 27.8; HRMS (ESI) *m/z*: [M + Na]<sup>+</sup> Calcd for C<sub>22</sub>H<sub>26</sub>N<sub>4</sub>NaO<sub>8</sub><sup>+</sup> 497.1643, found 497.1640.

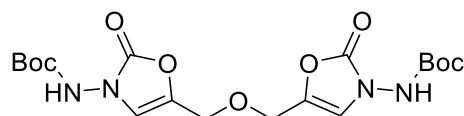

**Di-tert-butyl ((oxybis(methylene))bis(2-oxooxazole-5,3(2H)-diyl))dicarbamate (3ah):** The representative procedure was followed using dipropargyl ether **1ah** (37.6 mg, 0.4 mmol), DBAD (276.3 mg, 1.2 mmol, 3.0 equiv.), DABCO (2.2 mg, 0.02 mmol, 0.05 equiv.), anhydrous cupric chloride (10.8 mg, 0.08 mmol, 20 mol%), TMEDA (9.3 mg, 0.08 mmol, 20 mol%) in anhydrous MeCN (0.2 mL) and *i*PrOH (0.8 mL). The reaction mixture was stirred vigorously at 30 °C overnight (ca. 15 h), then oil bath was heated to 50 °C and stirred for another 6 h. The crude product was purified by flash chromatography (eluted with petroleum ether/EtOAc = 1:1 (v/v)) to afford **3ah** (68.5 mg, 39% yield) as a white solid, m.p. 156.0-156.9 °C. <sup>1</sup>H NMR (400 MHz, DMSO-*d*<sub>6</sub>) δ 10.23-9.59 (m, 2H, -NHCO), 7.32 (s, 2H), 4.22 (s, 4H), 1.57-1.28 (m, 18H); <sup>13</sup>C{<sup>1</sup>H} NMR (101 MHz, DMSO-*d*<sub>6</sub>) δ 154.1, 153.2, 133.7, 118.4, 81.2, 61.2, 27.8; HRMS (ESI) *m/z*: [M + Na]<sup>+</sup> Calcd for C<sub>18</sub>H<sub>26</sub>N<sub>4</sub>NaO<sub>9</sub><sup>+</sup> 465.1592, found 465.1591.

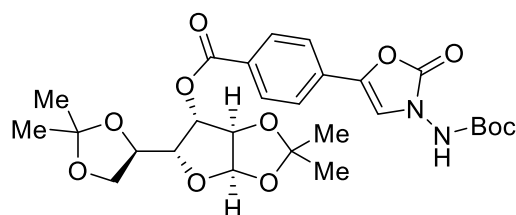

**Glucofuranose-derivatived oxazol-2-one (3aj):** The representative procedure was followed using glucofuranose-derivatived terminal alkyne **1aj** (155.4 mg, 0.4 mmol) as a starting material. The crude product was purified by flash chromatography (eluted with a gradient from 3:1 to 2:1 petroleum ether/EtOAc (v/v)) to afford **3aj** (145.7 mg, 65% yield) as a white foam.  $^1\text{H}$  NMR (400 MHz, DMSO- $d_6$ )  $\delta$  10.47-9.84 (m, 1H, -NHCO), 8.11 (s, 1H), 8.01 (d,  $J$  = 8.4 Hz, 2H), 7.68 (d,  $J$  = 8.4 Hz, 2H), 5.99 (d,  $J$  = 4.0 Hz, 1H), 5.26 (d,  $J$  = 2.8 Hz, 1H), 4.71 (d,  $J$  = 4.0 Hz, 1H), 4.38 (ddd,  $J$  = 7.2, 6.0, 5.2 Hz, 1H), 4.24 (dd,  $J$  = 7.2, 2.8 Hz, 1H), 4.06 (dd,  $J$  = 8.4, 6.0 Hz, 1H), 3.95 (dd,  $J$  = 8.4, 5.2 Hz, 1H), 1.56-1.36 (m, 12H), 1.33 (s, 3H), 1.26 (s, 3H), 1.20 (s, 3H);  $^{13}\text{C}\{^1\text{H}\}$  NMR (101 MHz, DMSO- $d_6$ )  $\delta$  164.2, 154.1, 152.4, 134.9, 131.7, 130.1, 128.0, 122.6, 117.0, 111.4, 108.5, 104.7, 82.6, 81.5, 79.1, 76.4, 72.1, 66.3, 27.8, 26.6, 26.4, 25.9, 25.0; HRMS (ESI)  $m/z$ :  $[\text{M} + \text{Na}]^+$  Calcd for  $\text{C}_{27}\text{H}_{34}\text{N}_2\text{NaO}_{11}^+$  585.2055, found 585.2056.

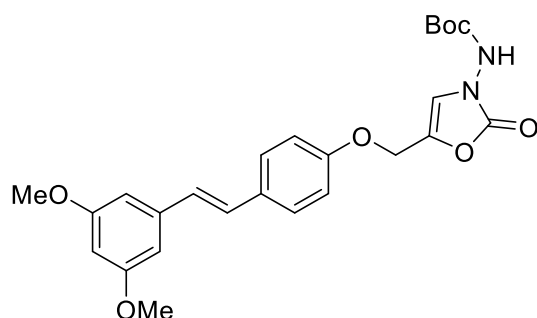

**Pterostilbene-derivatived N-aminooxazol-2-one (3ak):** The representative procedure was followed using pterostilbene-derivatived alkyne **1ak** (117.8 mg, 0.4 mmol) as a starting material. The reaction mixture was stirred vigorously at 30 °C overnight (ca. 15 h), then oil bath was heated to 50 °C (this process takes about 10 mins) and stirred for another 6 h. The crude product was purified by flash chromatography (eluted with a gradient from 3:1 to 2:1 petroleum ether/EtOAc (v/v)) to afford **3ak** (104.8 mg, 56% yield) as a white solid, m.p. 135.4~137.5 °C.  $^1\text{H}$  NMR (400 MHz, DMSO- $d_6$ )  $\delta$  10.23-9.60 (m, 1H, -NHCO), 7.55 (d,  $J$  = 8.0 Hz, 2H), 7.44 (s, 1H), 7.23 (d,  $J$  = 16.4 Hz, 1H), 7.05 (d,  $J$  = 16.4 Hz, 1H), 7.03 (d,  $J$  = 8.0 Hz, 2H), 6.75 (d,  $J$  = 2.4 Hz, 2H), 6.40 (dd,  $J$  = 2.4, 2.4 Hz, 1H), 4.89 (s, 2H), 3.77 (s, 6H), 1.52-1.28 (m, 9H);  $^{13}\text{C}\{^1\text{H}\}$  NMR (101 MHz, DMSO- $d_6$ )  $\delta$  160.6, 157.3, 154.1, 153.1, 139.4, 133.1, 130.3, 128.4, 127.8, 126.6, 119.0, 115.1, 104.2, 99.5, 81.3, 60.0, 55.2, 27.8; HRMS (ESI)  $m/z$ :  $[\text{M} + \text{Na}]^+$  Calcd for  $\text{C}_{25}\text{H}_{28}\text{N}_2\text{NaO}_7^+$  491.1789, found 491.1787.

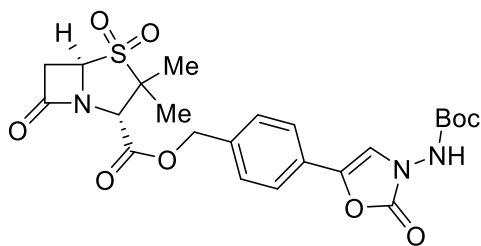

**Sulbactam-derivatived *N*-aminooxazol-2-one (3al):** The representative procedure was followed using sulbactam-derivatived terminal alkyne **1al** (139.0 mg, 0.4 mmol) as a starting material. The crude product was purified by flash chromatography (eluted with petroleum ether/EtOAc = 1.5:1 (v/v)) to afford **3al** (104.4 mg, 50% yield) as a white solid. m.p 191.9~193.5 °C. <sup>1</sup>H NMR (400 MHz, DMSO-*d*<sub>6</sub>) δ 10.37-9.78 (m, 1H, -NHCO), 7.88 (s, 1H), 7.56 (d, *J* = 8.0 Hz, 2H), 7.50 (d, *J* = 8.0 Hz, 2H), 5.28 (d, *J* = 12.4 Hz, 1H), 5.22 (d, *J* = 12.4 Hz, 1H), 5.19 (d, *J* = 4.8 Hz, 1H), 4.53 (s, 1H), 3.68 (dd, *J* = 16.4, 4.8 Hz, 1H), 3.26 (d, *J* = 16.4 Hz, 1H), 1.56-1.24 (m, 15H); <sup>13</sup>C{<sup>1</sup>H} NMR (101 MHz, DMSO-*d*<sub>6</sub>) δ 172.1, 166.7, 154.1, 152.6, 135.7, 134.9, 129.3, 127.1, 122.6, 114.7, 81.4, 67.0, 62.3, 62.2, 60.4, 37.3, 27.8, 19.5, 17.7; HRMS (ESI) *m/z*: [M + Na]<sup>+</sup> Calcd for C<sub>23</sub>H<sub>27</sub>N<sub>3</sub>NaO<sub>9</sub>S<sup>+</sup> 544.1360, found 544.1357.

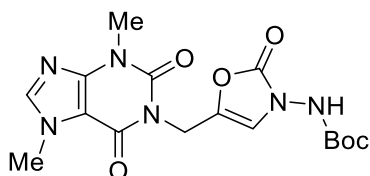

**Theobromine-derivatived *N*-aminooxazol-2-one (3am):** The representative procedure was followed using theobromine-derivatived alkyne **1am** (87.3 mg, 0.4 mmol) as a starting material. The reaction mixture was stirred vigorously at 30 °C overnight (ca. 15 h), then oil path was heated to 50 °C and stirred for another 3 h. The crude product was purified by flash chromatography (eluted with EtOAc) to afford **3am** (44.5 mg, 31% yield) as a white foam. <sup>1</sup>H NMR (400 MHz, DMSO-*d*<sub>6</sub>) δ 10.17-9.53 (m, 1H, -NHCO), 8.05 (s, 1H), 7.13 (s, 1H), 4.82 (s, 2H), 3.89 (s, 3H), 3.42 (s, 3H), 1.62-1.27 (m, 9H); <sup>13</sup>C{<sup>1</sup>H} NMR (101 MHz, DMSO-*d*<sub>6</sub>) δ 154.0, 153.8, 152.9, 150.5, 148.6, 143.2, 133.3, 116.6, 106.5, 81.1, 35.3, 33.2, 29.5, 27.8; HRMS (ESI) *m/z*: [M + Na]<sup>+</sup> Calcd for C<sub>16</sub>H<sub>20</sub>N<sub>6</sub>NaO<sub>6</sub><sup>+</sup> 415.1337, found 415.1335.

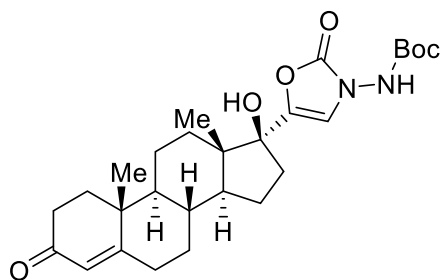

**Ethisterone-derivatived N-aminooxazol-2-one (3an):** The representative procedure was followed using ethisterone-derivatived terminal alkyne **1an** (125.0 mg, 0.4 mmol) as a starting material in anhydrous MeCN (0.4 mL) and <sup>i</sup>PrOH (1.6 mL). The reaction mixture was stirred vigorously at 30 °C for 6 h, then oil bath was heated to 60 °C and stirred for another 16 h. The crude product was purified by flash chromatography (eluted with petroleum ether/EtOAc = 1:1 (v/v)) to afford **3an** (27.4 mg, 14% yield) as a white foam, along with recovery of the starting material (83.9 mg, 43% brsm). <sup>1</sup>H NMR (400 MHz, DMSO-*d*<sub>6</sub>) δ 10.05-9.56 (m, 1H, -NHCO), 7.00 (s, 1H), 5.61 (s, 1H), 5.39-5.26 (m, 1H, -OH), 2.46-2.30 (m, 2H), 2.29-2.19 (m, 1H), 2.18-2.06 (m, 1H), 2.02-1.88 (m, 2H), 1.88-1.73 (m, 2H), 1.72-1.08 (m, 21H), 0.95-0.68 (m, 5H); <sup>13</sup>C{<sup>1</sup>H} NMR (101 MHz, DMSO-*d*<sub>6</sub>) δ 198.0, 170.8, 154.1, 153.4, 141.9, 123.1, 114.9, 80.9, 80.2, 53.0, 48.9, 46.7, 38.2, 35.5, 35.4, 35.0, 33.6, 33.1, 32.0, 31.5, 27.9, 23.1, 20.3, 16.9, 13.8; HRMS (ESI) *m/z*: [M + Na]<sup>+</sup> Calcd for C<sub>27</sub>H<sub>38</sub>N<sub>2</sub>NaO<sub>6</sub><sup>+</sup> 509.2622, found 509.2617.

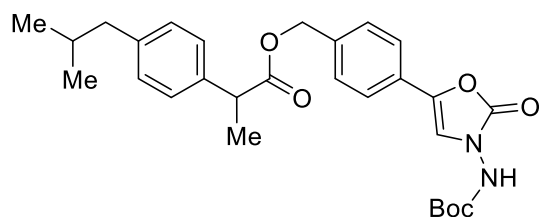

**Ibuprofen-derivatived N-aminooxazol-2-one (3ao):** The representative procedure was followed using (±)-ibuprofen derivatived alkyne **1ao** (128.2 mg, 0.4 mmol) as a starting material. The crude product was purified by flash chromatography (eluted with petroleum ether/EtOAc = 4:1 (v/v)) to afford (±)-**3ao** (153.2 mg, 78% yield) as a white solid, m.p. 139.7~141.8 °C. <sup>1</sup>H NMR (400 MHz, DMSO-*d*<sub>6</sub>) δ 10.37-9.78 (m, 1H, -NHCO), 7.83 (s, 1H), 7.45 (d, *J* = 8.4 Hz, 2H), 7.27 (d, *J* = 8.4 Hz, 2H), 7.18 (d, *J* = 8.4 Hz, 2H), 7.09 (d, *J* = 8.4 Hz, 2H), 5.11 (d, *J* = 13.2 Hz, 1H), 5.07 (d, *J* = 13.2 Hz, 1H), 3.82 (q, *J* = 7.2 Hz, 1H), 2.40 (d, *J* = 6.8 Hz, 2H), 1.87-1.70 (m, 1H), 1.53-1.32 (m, 12H), 0.84 (d, *J* = 6.8 Hz, 6H); <sup>13</sup>C{<sup>1</sup>H} NMR

(101 MHz, DMSO-*d*<sub>6</sub>)  $\delta$  173.7, 154.1, 152.6, 139.9, 137.7, 136.1, 135.8, 129.1, 128.1, 127.1, 126.6, 122.4, 114.4, 81.3, 65.1, 44.2, 44.1, 29.6, 27.8, 22.1, 18.3; HRMS (ESI) *m/z*: [M + Na]<sup>+</sup> Calcd for C<sub>28</sub>H<sub>34</sub>N<sub>2</sub>NaO<sub>6</sub><sup>+</sup> 517.2309, found 517.2306.

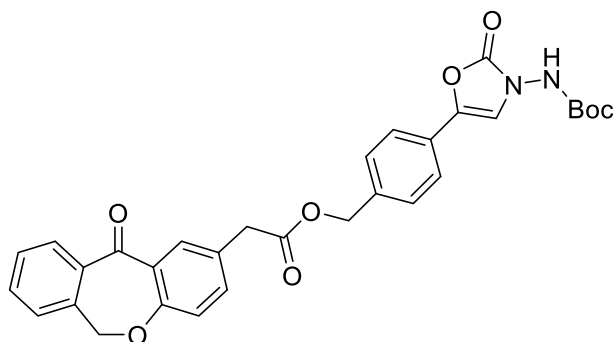

**Isoxepac-derivativated N-aminooxazol-2-one (3ap):** The representative procedure was followed using isoxepac-derivativated terminal alkyne **1ap** (153.0 mg, 0.4 mmol) as a starting material. The crude product was purified by flash chromatography (eluted with petroleum ether/EtOAc = 3:1 (v/v)) to afford **3ap** (140.8 mg, 63% yield) as a white foam. <sup>1</sup>H NMR (400 MHz, DMSO-*d*<sub>6</sub>)  $\delta$  10.34-9.72 (m, 1H, -NHCO), 8.02 (d, *J* = 2.4 Hz, 1H), 7.85 (s, 1H), 7.77 (dd, *J* = 7.6, 1.6 Hz, 2H), 7.65 (ddd, *J* = 7.6, 7.6, 1.6 Hz, 2H), 7.59-7.47 (m, 5H), 7.41 (d, *J* = 7.6 Hz, 2H), 7.07 (d, *J* = 7.6 Hz, 1H), 5.29 (s, 2H), 5.13 (s, 2H), 3.82 (s, 2H), 1.54-1.32 (m, 9H); <sup>13</sup>C{<sup>1</sup>H} NMR (101 MHz, DMSO-*d*<sub>6</sub>)  $\delta$  190.1, 171.0, 159.8, 154.1, 152.6, 139.9, 136.9, 136.0, 135.81, 135.77, 133.0, 131.9, 129.2, 128.7, 128.5, 128.3, 128.0, 126.7, 124.5, 122.5, 120.7, 114.4, 81.3, 72.7, 65.4, 39.0, 27.8; HRMS (ESI) *m/z*: [M + Na]<sup>+</sup> Calcd for C<sub>31</sub>H<sub>28</sub>N<sub>2</sub>NaO<sub>8</sub><sup>+</sup> 579.1738, found 579.1737.

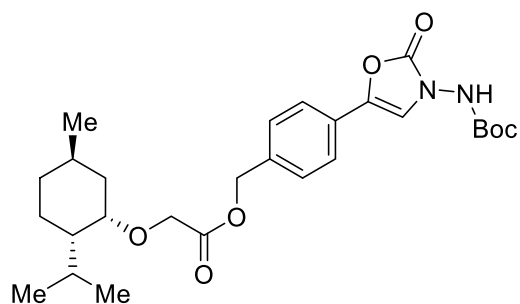

**(-)-Menthol-derivativated N-aminooxazol-2-one (3aq):** The representative procedure was followed using (-)-menthol-derivativated terminal alkyne **1aq** (131.4 mg, 0.4 mmol) as a starting



material. The crude product was purified by flash chromatography (eluted with petroleum ether/EtOAc = 4:1 (v/v)) to afford **3aq** (146.5 mg, 73% yield) as a white solid, m.p. 141.4~143.2 °C. <sup>1</sup>H NMR (400 MHz, DMSO-*d*<sub>6</sub>) δ 10.33-9.76 (m, 1H, -NHCO), 7.86 (s, 1H), 7.53 (d, *J* = 8.0 Hz, 2H), 7.43 (d, *J* = 8.0 Hz, 2H), 5.14 (s, 2H), 4.20 (d, *J* = 16.4 Hz, 1H), 4.15 (d, *J* = 16.4 Hz, 1H), 3.19-3.09 (m, 1H), 2.29-2.16 (m, 1H), 2.12-2.00 (m, 1H), 1.64-1.21 (m, 12H), 1.20-1.09 (m, 1H), 0.98-0.65 (m, 12H); <sup>13</sup>C{<sup>1</sup>H} NMR (101 MHz, DMSO-*d*<sub>6</sub>) δ 170.4, 154.1, 152.6, 135.8, 135.7, 128.7, 126.8, 122.5, 114.5, 81.3, 79.0, 65.3, 65.1, 47.8, 34.0, 30.8, 27.8, 25.0, 22.9, 22.2, 20.8, 16.3; HRMS (ESI) *m/z*: [M + Na]<sup>+</sup> Calcd for C<sub>27</sub>H<sub>38</sub>N<sub>2</sub>NaO<sub>7</sub><sup>+</sup> 525.2571, found 525.2569.

## VI. Synthetic applications

### a. Gram-scale azodicarboxylate-alkyne (3+2) cycloaddition procedure:

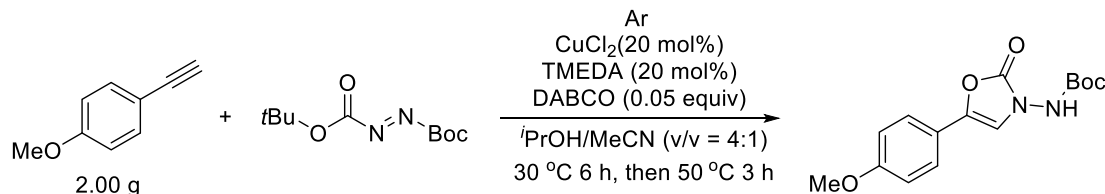

In a 100 mL three-necked flask, DBAD (5.23 g, 22.7 mmol, 1.5 equiv.), DABCO (84.6 mg, 0.76 mmol, 0.05 equiv.), anhydrous cupric chloride (406.0 mg, 3.0 mmol, 20 mol%), were added successively. A reflux condenser was attached, then the flask was evacuated and backfilled with argon (this process was repeated for 3 times). Anhydrous MeCN (8.0 mL), 4-ethynylanisole (**1a**, 2.00 g, 15.1 mmol, 1.0 equiv.), TMEDA (350.3 mg, 3.0 mmol, 20 mol%), and anhydrous *i*PrOH (32.0 mL) were added under argon atmosphere. The reaction mixture was stirred at ambient temperature for 1 minute, then submerged to pre-heated oil bath at 30°C and stirred for 6 hours. Subsequently, the temperature of the oil bath was raised to 50°C (this process takes about 10 mins) and the reaction was continued for an additional 3 hours, then:

**(a) Purification procedures utilizing column chromatography:** Once the reaction mixture was cooled to ambient temperature, 30 mL of ethyl acetate was introduced, followed by the addition of 40 mL of NaHCO<sub>3</sub> saturated aqueous solution. The organic phase was subsequently extracted with ethyl acetate (3 × 30 mL). The combined organic layer was washed with brine (30 mL), dried over Na<sub>2</sub>SO<sub>4</sub>, filtered, and concentrated. The crude product was purified by flash chromatography (eluted with a gradient from 5:1 to 2:1 petroleum ether/EtOAc (v/v)) to afford the **3a** (3.26 g, 70%) as a white solid.

**(b) Purification procedures employing trituration:** Upon cooling the reaction mixture to ambient temperature, the majority of the solvent was removed under reduced pressure using a rotary evaporator. The resulting residue was subsequently diluted with ethyl acetate (20 mL). Silica gel (200-300 mesh) was carefully packed into a sintered glass funnel, which was connected to a vacuum filtration apparatus. The reaction mixture was carefully filtered through the silica gel under vacuum conditions. The combined filtrates were concentrated under reduced

pressure to obtain a crude product. This crude material was suspended in 20 mL of ethyl acetate and transferred into a 500 mL conical flask equipped with a magnetic stir bar. During stirring, 250 mL of petroleum ether was added dropwise over 2–3 minutes. After addition, the mixture was allowed to stand undisturbed for 5 minutes to facilitate complete precipitation. The resulting solid was collected *via* vacuum filtration and dried under vacuum to yield a white solid of **3a** (3.20 g, 69%).

#### b. N-functionalizations:

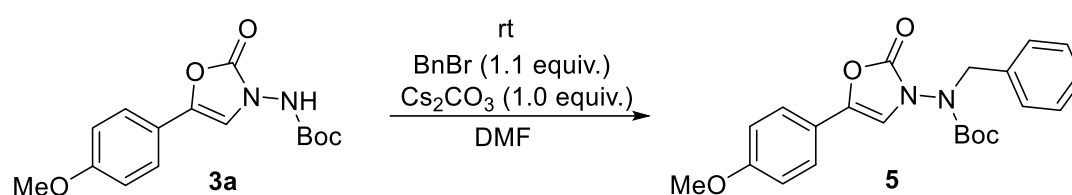

**tert-Butyl benzyl(5-(4-methoxyphenyl)-2-oxooxazol-3(2H)-yl)carbamate (5):** In a 15 mL oven-dried resealable screw-cap test tube, a mixture of **3a** (91.9 mg, 0.3 mmol, 1.0 equiv.) and cesium carbonate (97.5 mg, 0.3 mmol, 1.0 equiv.) in anhydrous MeCN (1.0 mL) was prepared. To this mixture, benzyl bromide (56.4 mg, 0.33 mmol, 1.1 equiv.) was added dropwise. The reaction mixture was stirred for 12 h at room temperature. The reaction was diluted with water (10 mL) and extracted with ethyl acetate (3 × 10 mL). The combined organic phases were washed with brine (3 × 10 mL), dried over Na<sub>2</sub>SO<sub>4</sub>, filtered, and concentrated in vacuo. The crude material was purified by flash chromatography (eluted with petroleum ether/EtOAc = 8:1 (v/v)) to afford **5** (112.4 mg, 95% yield) as a white solid, m.p. 107.0~108.0 °C. <sup>1</sup>H NMR (400 MHz, DMSO-*d*<sub>6</sub>) δ 7.50 (s, 1H), 7.45-7.26 (m, 7H), 6.98 (d, *J* = 8.8 Hz, 2H), 4.90 (d, *J* = 14.8 Hz, 1H), 4.62 (d, *J* = 14.8 Hz, 1H), 3.76 (s, 3H), 1.40 (s, 9H); <sup>13</sup>C NMR (101 MHz, DMSO-*d*<sub>6</sub>) δ 159.2, 153.2, 152.0, 136.5, 135.7, 128.5, 128.3, 127.8, 124.2, 119.4, 114.4, 111.2, 82.4, 55.2, 52.6, 27.6; HRMS (ESI) *m/z*: [M + Na]<sup>+</sup> Calcd for C<sub>22</sub>H<sub>24</sub>N<sub>2</sub>NaO<sub>5</sub><sup>+</sup> 419.1577, found 419.1577.

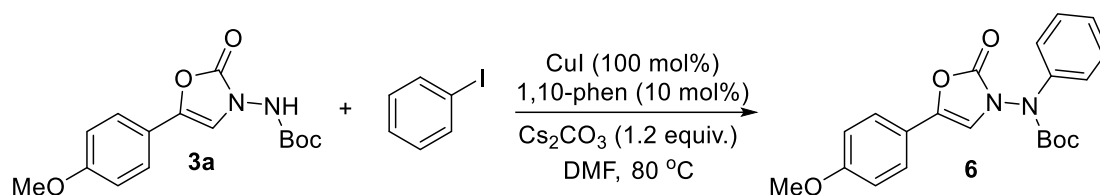

***tert*-Butyl (5-(4-methoxyphenyl)-2-oxooxazol-3(2*H*)-yl)(phenyl)carbamate (**6**):** Compound **6** was synthesized in accordance with a documented protocol, with some modifications.<sup>[6]</sup> In a 15 mL oven-dried resealable screw-cap test tube, CuI (57.0 mg, 0.3 mmol, 100 mol%), 1,10-phenanthroline (5.4 mg, 0.03 mmol, 10 mol%), **3a** (91.8 mg, 0.3 mmol, 1.0 equiv.) and Cs<sub>2</sub>CO<sub>3</sub> (117.4 mg, 0.36 mmol, 1.2 equiv.) were added. The tube was evacuated and backfilled with argon. Anhydrous DMF (3.0 mL) and iodobenzene (61.2 mg, 0.33 mmol, 1.1 equiv.) were added via syringe. The tube was sealed and stirred at 80 °C for 30 h. The reaction mixture was cooled to room temperature, diluted with water (6 mL) and extracted with ethyl acetate (3 × 10 mL). The combined organic phases were washed with brine (3 × 10 mL), dried over Na<sub>2</sub>SO<sub>4</sub>, filtered, and concentrated in vacuo. The crude material was purified by flash chromatography (eluted with petroleum ether/EtOAc = 6:1 (v/v)) to afford **6** (59.1 mg, 52% yield) as a slightly orange solid. <sup>1</sup>H NMR (400 MHz, DMSO-*d*<sub>6</sub>) δ 7.96 (s, 1H), 7.53-7.40 (m, 6H), 7.36-7.27 (m, 1H), 7.02 (d, *J* = 9.2 Hz, 2H), 3.78 (s, 3H), 1.42 (s, 9H); <sup>13</sup>C{<sup>1</sup>H} NMR (101 MHz, CDCl<sub>3</sub>) δ 159.4, 152.4, 151.4, 139.8, 137.2, 129.1, 127.1, 124.4, 124.1, 119.3, 114.5, 111.0, 83.3, 55.2, 27.5; HRMS (ESI) *m/z*: [M + Na]<sup>+</sup> Calcd for C<sub>21</sub>H<sub>22</sub>N<sub>2</sub>NaO<sub>5</sub><sup>+</sup> 405.1421, found 405.1422.

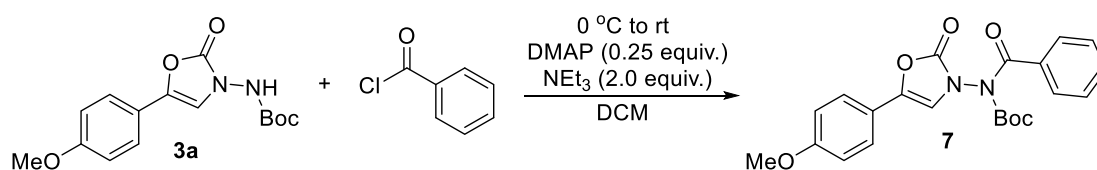

***tert*-Butyl benzoyl(5-(4-methoxyphenyl)-2-oxooxazol-3(2*H*)-yl)carbamate (**7**):** In an 15 mL oven-dried resealable screw-cap test tube, **3a** (91.9 mg, 0.3 mmol) and DMAP (9.2 mg, 0.075 mmol, 0.25 equiv.) were dissolved in DCM (1.5 mL). Et<sub>3</sub>N (60.7 mg, 0.6 mmol, 2.0 equiv.) was added, and the mixture cooled to 0 °C. Benzoyl chloride (46.4 mg, 0.33 mmol, 1.1 equiv.) was added dropwise at 0 °C, then stirred at room temperature for 1 h. The reaction was quenched with saturated NH<sub>4</sub>Cl (4 mL), extracted with DCM (3 × 10 mL), dried over Na<sub>2</sub>SO<sub>4</sub>, filtered,

and concentrated. The crude product was purified by flash chromatography (eluted with petroleum ether/EtOAc = 6:1 (v/v)) to yield compound **7** (78.8 mg, 64% yield) as a white solid, m.p. 167.6~169.0 °C  $^1\text{H}$  NMR (400 MHz, DMSO- $d_6$ )  $\delta$  7.97 (s, 1H), 7.73 (d,  $J$  = 7.2 Hz, 2H), 7.68 (dd,  $J$  = 7.2, 7.2 Hz, 1H), 7.58 (dd,  $J$  = 7.2, 7.2 Hz, 2H), 7.49 (d,  $J$  = 8.8 Hz, 2H), 7.05 (d,  $J$  = 8.8 Hz, 1H), 3.80 (s, 3H), 1.19 (s, 9H);  $^{13}\text{C}\{^1\text{H}\}$  NMR (101 MHz, DMSO- $d_6$ )  $\delta$  168.9, 159.5, 151.9, 149.2, 137.5, 134.0, 132.7, 128.6, 128.0, 124.4, 119.1, 114.6, 110.9, 85.9, 55.3, 26.8; HRMS (ESI)  $m/z$ :  $[\text{M} + \text{Na}]^+$  Calcd for  $\text{C}_{22}\text{H}_{22}\text{N}_2\text{NaO}_6^+$  433.1370, found 433.1368.

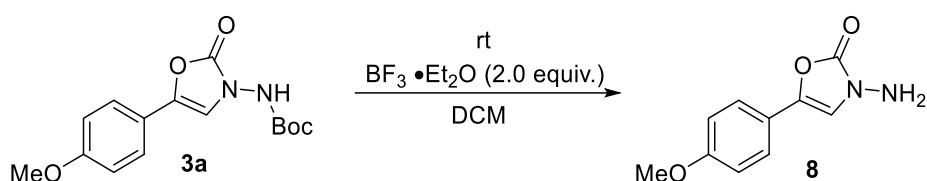

**3-Amino-5-(4-methoxyphenyl)oxazol-2(3H)-one (**8**):** In a 15 mL oven-dried resealable screw-cap test tube were added **3a** (91.8 mg, 0.3 mmol) and DCM (1.5 mL).  $\text{BF}_3 \cdot \text{Et}_2\text{O}$  (85.2 mg, 0.6 mmol, 2.0 equiv.) was added to the tube *via* syringe. The mixture was stirred at room temperature for 10 min. The reaction was quenched by addition of saturated aq.  $\text{NaHCO}_3$  (4 mL) at 0 °C. After quenching the reaction, the mixture was allowed to warm to room temperature and was extracted with DCM (10 mL  $\times$  4). The organic layer was dried over anhydrous  $\text{Na}_2\text{SO}_4$ , filtered, and concentrated. The crude material was purified by trituration with petroleum ether/EtOAc = 40:1 (v/v) to afford the desired compound **8** (44.9 mg, 73% yield) as a slightly yellow solid, m.p. 198.2~199.6 °C.  $^1\text{H}$  NMR (400 MHz, DMSO- $d_6$ )  $\delta$  7.46 (s, 1H), 7.44 (d,  $J$  = 8.8 Hz, 2H), 6.97 (d,  $J$  = 8.8 Hz, 2H), 5.48 (s, 2H,  $-\text{NH}_2$ ), 3.76 (s, 3H);  $^{13}\text{C}\{^1\text{H}\}$  NMR (101 MHz, DMSO- $d_6$ )  $\delta$  158.7, 154.2, 134.8, 123.8, 120.3, 114.4, 113.4, 55.2; HRMS (ESI)  $m/z$ :  $[\text{M} + \text{Na}]^+$  Calcd for  $\text{C}_{10}\text{H}_{10}\text{N}_2\text{NaO}_3^+$  229.0584, found 229.0582.

### c. Hydrogenation of N-aminooxazol-2-one

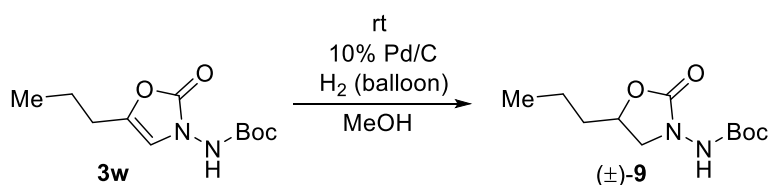

***tert*-Butyl (2-oxo-5-propyloxazolidin-3-yl)carbamate (9):** In a 10 mL round bottom flask were added **3w** (60.0 mg, 0.2 mmol) and 10% Pd/C (6.0 mg, 10wt%) were combined. The flask was evacuated and backfilled with hydrogen (this sequence was repeated a total of three times). CH<sub>3</sub>OH (1.0 mL) was added to the tube *via* syringe. The reaction mixture was stirred at room temperature for 24 h. After completion, the reaction mixture was filtered through a pad of Celite to remove the catalyst. The filtrate was concentrated under reduced pressure, and the crude residue was purified by flash chromatography (eluted with petroleum ether/EtOAc = 5:1 (v/v)) to afford the corresponding product ( $\pm$ )-**9** (51.6 mg, 86% yield) as a white solid, m.p. 130.1~131.4 °C. <sup>1</sup>H NMR (400 MHz, DMSO-*d*<sub>6</sub>)  $\delta$  9.44-8.81 (m, 1H, -NHCO), 4.61-4.47 (m, 1H), 3.70 (dd, *J* = 8.0, 8.0 Hz, 1H), 3.29 (dd, *J* = 8.0, 8.0 Hz, 1H), 1.72-1.53 (m, 2H), 1.52-1.21 (m, 11H), 0.91 (t, *J* = 7.2 Hz, 3H); <sup>13</sup>C{<sup>1</sup>H} NMR (101 MHz, DMSO-*d*<sub>6</sub>)  $\delta$  156.8, 154.1, 80.2, 72.7, 50.8, 36.1, 28.0, 17.3, 13.6; HRMS (ESI) *m/z*: [M + Na]<sup>+</sup> Calcd for C<sub>11</sub>H<sub>20</sub>N<sub>2</sub>NaO<sub>4</sub><sup>+</sup> 267.1315, found 267.1316.

#### d. Esterification reaction of **3ac** with Isoxepac

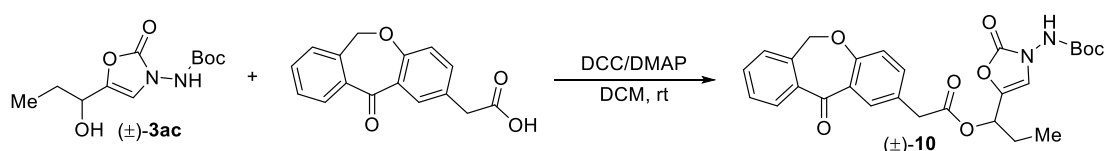

**1-(3-((*tert*-butoxycarbonyl)amino)-2-oxo-2,3-dihydrooxazol-5-yl)propyl 2-(11-oxo-6,11-dihydrodibenzo[b,e]oxepin-2-yl)acetate (10):** In a 10 mL round-bottom flask were combined ( $\pm$ )-**3ac** (155.0 mg, 0.6 mmol, 1.0 equiv.), isoxepac (161.0 mg, 0.6 mmol, 1.0 equiv.), DCC (185.7 mg, 0.9 mmol, 1.5 equiv.), and DMAP (7.3 mg, 0.06 mmol, 0.1 equiv.). The flask was evacuated and backfilled with argon (three cycles). Anhydrous DCM (3.0 mL) was then added *via* syringe. The reaction mixture was stirred at room temperature for 16 h. The resulting byproduct DCU was removed by filtration through a short pad of Celite. The filtrate was concentrated under reduced pressure. The crude material was purified by flash column chromatography (eluting with petroleum ether/EtOAc = 2:1 (v/v)) to afford compound ( $\pm$ )-**10** (126.0 mg, 42% yield) as a white foam. <sup>1</sup>H NMR (400 MHz, DMSO-*d*<sub>6</sub>)  $\delta$  10.21-9.66 (m, 1H, -NHCO), 8.08-7.96 (m, 1H), 7.77 (d, *J* = 8.0 Hz, 1H), 7.66 (dd, *J* = 8.0, 8.0 Hz, 1H), 7.61-

7.44 (m, 3H), 7.54 (d,  $J = 8.0$  Hz, 1H), 7.37 (s, 1H), 7.07 (d,  $J = 8.0$  Hz, 1H), 5.50 (t,  $J = 7.2$  Hz, 1H), 5.29 (s, 2H), 3.80 (s, 2H), 1.90-1.69 (m, 2H), 1.52-1.26 (m, 9H), 0.83 (t,  $J = 7.2$  Hz, 3H);  $^{13}\text{C}\{^1\text{H}\}$  NMR (101 MHz, DMSO- $d_6$ )  $\delta$  190.1, 170.5, 159.9, 154.1, 152.9, 139.9, 136.8, 135.9, 134.6, 133.1, 131.9, 129.2, 128.8, 128.3, 127.9, 124.5, 120.7, 117.6, 81.2, 72.7, 68.1, 38.8, 27.8, 23.9, 9.4; HRMS (ESI)  $m/z$ :  $[\text{M} + \text{Na}]^+$  Calcd for  $\text{C}_{27}\text{H}_{28}\text{N}_2\text{NaO}_8^+$  531.1738, found 531.1734.

#### e. Consise synthesis of Furaltadone

##### Step 1:

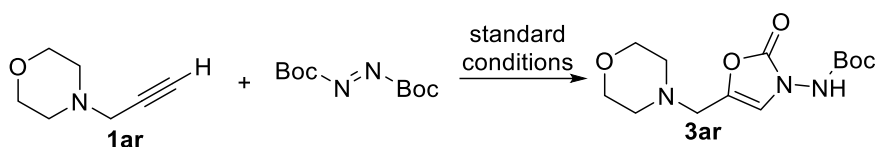

**tert-Butyl (5-(morpholinomethyl)-2-oxooxazol-3(2H)-yl)carbamate (3ar):** The general procedure for preparing N-aminooxazol-2-one was followed using N-propargyl morpholine **1ar** (125.2 mg, 1.0 mmol), DBAD (345.4 mg, 1.5 mmol, 1.5 equiv.), DABCO (5.8 mg, 0.05 mmol, 0.05 equiv.), anhydrous cupric chloride (26.9 mg, 0.2 mmol, 20 mol%), TMEDA (23.2 mg, 0.2 mmol, 20 mol%) in anhydrous MeCN (0.4 mL) and  $i$ PrOH (1.6 mL). The crude product was purified by flash chromatography (eluted with EtOAc) to afford **3ar** (161.6 mg, 44% yield) as a white solid, m.p. 146.8~147.9 °C.  $^1\text{H}$  NMR (400 MHz, DMSO- $d_6$ )  $\delta$  10.11-9.57 (m, 1H, -NHCO), 7.12 (s, 1H), 3.65-3.50 (m, 4H), 3.26 (s, 2H), 2.44-2.29 (m, 4H), 1.51-1.29 (m, 9H);  $^{13}\text{C}\{^1\text{H}\}$  NMR (101 MHz, DMSO- $d_6$ )  $\delta$  154.1, 153.4, 133.9, 117.2, 81.1, 66.1, 52.5, 52.3, 27.9; HRMS (ESI)  $m/z$ :  $[\text{M} + \text{Na}]^+$  Calcd for  $\text{C}_{13}\text{H}_{21}\text{N}_3\text{NaO}_5^+$  322.1373, found 322.1375.

##### Step 2:

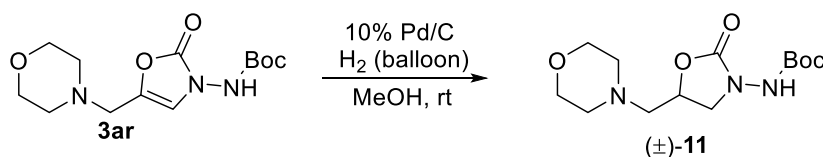

***tert*-butyl (5-(morpholinomethyl)-2-oxooxazolidin-3-yl)carbamate (**11**):** In a 10 mL round-bottom flask, **3ar** (90.0 mg, 0.3 mmol) and 10% Pd/C (9.0 mg, 10wt%) were combined. The flask was evacuated and backfilled with hydrogen (this process was repeated three times). CH<sub>3</sub>OH (1.5 mL) was then added via syringe. The reaction mixture was stirred under a H<sub>2</sub> atmosphere at room temperature for 16 h. After completion, the reaction mixture was filtered through a pad of Celite to remove the catalyst. The filtrate was concentrated under reduced pressure, and the crude residue was purified by flash column chromatography (eluting with ethyl acetate) to afford product ( $\pm$ )-**11** (33.0 mg, 36% yield) as a white solid. m.p. 143.7~145.3 °C. <sup>1</sup>H NMR (400 MHz, CDCl<sub>3</sub>)  $\delta$  6.86 (br s, 1H, -NHCO), 4.73-4.55 (m, 1H), 3.81-3.70 (m, 1H), 3.69-3.58 (m, 4H), 3.58-3.37 (m, 1H), 2.77-2.63 (m, 1H), 2.63-2.37 (m, 5H), 1.42 (s, 9H); <sup>13</sup>C{<sup>1</sup>H} NMR (101 MHz, CDCl<sub>3</sub>)  $\delta$  154.2, 152.7, 136.0, 129.0, 128.2, 127.0, 122.5, 114.2, 81.3, 27.9; HRMS (ESI) *m/z*: [M + Na]<sup>+</sup> Calcd for C<sub>13</sub>H<sub>23</sub>N<sub>3</sub>NaO<sub>5</sub><sup>+</sup> 324.1530, found 324.1534.

**Step 3:**

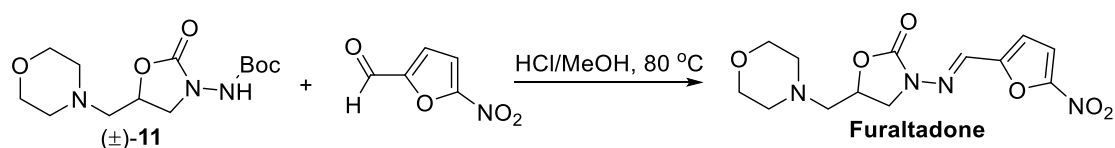

**Fulratadone:** In an oven-dried resealable screw-cap test tube, ( $\pm$ )-**11** (20.7 mg, 0.07 mmol, 1 equiv.) and 5-nitrofurfural (14.1 mg, 0.1 mmol, 1.5 equiv.) were added. The tube was evacuated and backfilled with argon (this sequence was repeated a total of three times). Under an argon atmosphere, anhydrous CH<sub>3</sub>OH (0.5 mL) and a 4.0 M solution of HCl in dioxane (35  $\mu$ L, 0.14 mmol, 2.0 equiv.) were added *via* syringe. The reaction mixture was stirred at 80 °C for 30 min. The reaction mixture was cooled to room temperature, then quenched with saturated aq. NaHCO<sub>3</sub> (3 mL) and washed with EtOAc (3  $\times$  10 mL). The combined organic phases were washed with brine (3  $\times$  10 mL), dried over Na<sub>2</sub>SO<sub>4</sub>, filtered, and concentrated in vacuo. The crude material was purified by flash chromatography (eluted with a gradient from 80:1 to 40:1 DCM/MeOH (v/v)) to afford Fulratadone (19.0 mg, 85% yield) as a yellow solid, m.p. 206.2~208.7 °C. <sup>1</sup>H NMR (400 MHz, DMSO-*d*<sub>6</sub>)  $\delta$  7.85 (s, 1H), 7.80 (d, *J* = 4.0 Hz, 1H), 7.15 (d, *J* = 4.0 Hz, 1H), 5.02-4.88 (m, 1H), 4.04 (t, *J* = 8.8 Hz, 1H), 3.71-3.62 (m, 1H), 3.62-3.48



(m, 4H), 2.74-2.60 (m, 2H), 2.55-2.40 (m, 4H);  $^{13}\text{C}\{^1\text{H}\}$  NMR (101 MHz, DMSO- $d_6$ )  $\delta$  152.8, 151.8, 132.0, 114.9, 114.7, 71.3, 66.2, 60.7, 53.7, 45.9; HRMS (ESI)  $m/z$ :  $[\text{M} + \text{Na}]^+$  Calcd for  $\text{C}_{13}\text{H}_{16}\text{N}_4\text{NaO}_6^+$  347.0962, found 347.0958. As shown in the spectra section, the NMR data are consistent with those of the commercial reference material (Adamas,  $\geq 98\%$  HPLC), m.p. 208.1~210.7 °C.

## VII. Mechanistic studies

### a. Control experiments on ynehydrazide annulation reaction

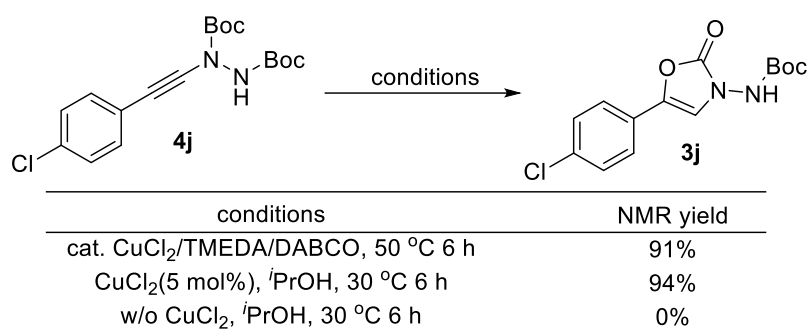

In a resealable screw-cap test tube, DABCO (2.2 mg, 0.08 mmol, 0.05 equiv.), anhydrous cupric chloride (10.8 mg, 0.08 mmol, 20 mol%) and **4j** (146.7 mg, 0.4 mmol, 1.0 equiv.) were added. The tube was evacuated and backfilled with argon (this process was repeated for 3 times). Anhydrous MeCN (0.2 mL), TMEDA (9.3 mg, 0.08 mmol, 20 mol%) and isopropanol (0.8 mL) were added sequentially *via* syringe under argon atmosphere. The reaction mixture was stirred vigorously at 50 °C for 6 h. Once the reaction mixture was cooled to ambient temperature, saturated aq. sodium bicarbonate (4 mL) was added. The aqueous layer was extracted with EtOAc (3  $\times$  6 mL). After extraction, 4-nitroacetophenone (66.0 mg, 0.4 mmol) was added as internal standard, the organic layer was studied by NMR spectroscopy. Control experiments indicated that copper plays a pivotal role in the 5-*endo*-dig annulation, and simple cupric chloride showing catalytic efficacy comparable to that of complex copper catalysts.

### b. Deuterium-labeling experiment

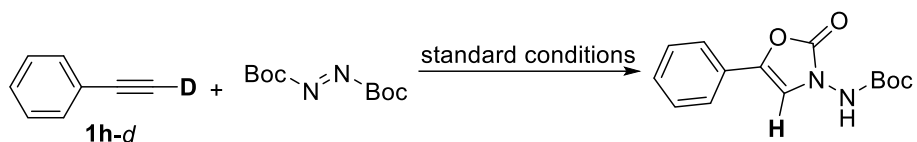

The representative procedure was followed using commercially available **1h-d** (41.2 mg, 0.4 mmol, 1.0 equiv.) as a starting material. After that, the reaction was diluted with ethyl acetate (4 mL), then saturated aq. sodium bicarbonate (4 mL) was added. The aqueous layer was extracted with EtOAc (3 × 8 mL). The combined organic layer was washed with brine (5 mL), dried over Na<sub>2</sub>SO<sub>4</sub>, filtered, and concentrated under reduced pressure. The crude product was purified by eluted with a gradient from 8:1 to 4:1 petroleum ether/EtOAc (v/v)) to afford **3h** (70.0 mg, 63% yield). Both crude product and isolated **3h** NMR spectroscopy indicated no deuterium incorporation in the product.

## VIII. References

- [1] Mo, X.; Huang, H.; Zhang, G. *ACS Catal.* **2022**, *12*, 9944.
- [2] Tang, K.-W.; Yang, S.-C.; Tseng, C.-H. *Int. J. Mol. Sci.* **2019**, *20*, 4564.
- [3] Holmes, J.; Kearsy, R. J.; Paske, K. A.; Singer, F. N.; Atallah, S.; Pask, C. M.; Phillips, R. M.; Willans, C. E. *Organometallics* **2019**, *38*, 2530.
- [4] Wang, Y.; Hu, Y.; Jin, L.; Gu, Y.; Xie, Y. *Org. Lett.* **2025**, *27*, 692.
- [5] Qin, W.; Ni, Q.; Jiao, W.; Ma, Y. *Chem. Commun.* **2023**, *59*, 7951.
- [6] Kim, K.-Y.; Shin, J.-T.; Lee, K.-S.; Cho, C.-G. *Tetrahedron Lett.* **2004**, *45*, 117.

## IX. Copies of NMR spectra

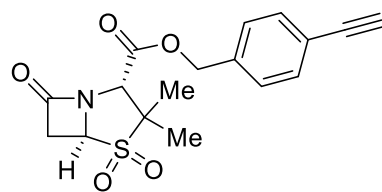

**1am**;  $^1\text{H}$  NMR  
(400 MHz,  $\text{DMSO}-d_6$ )

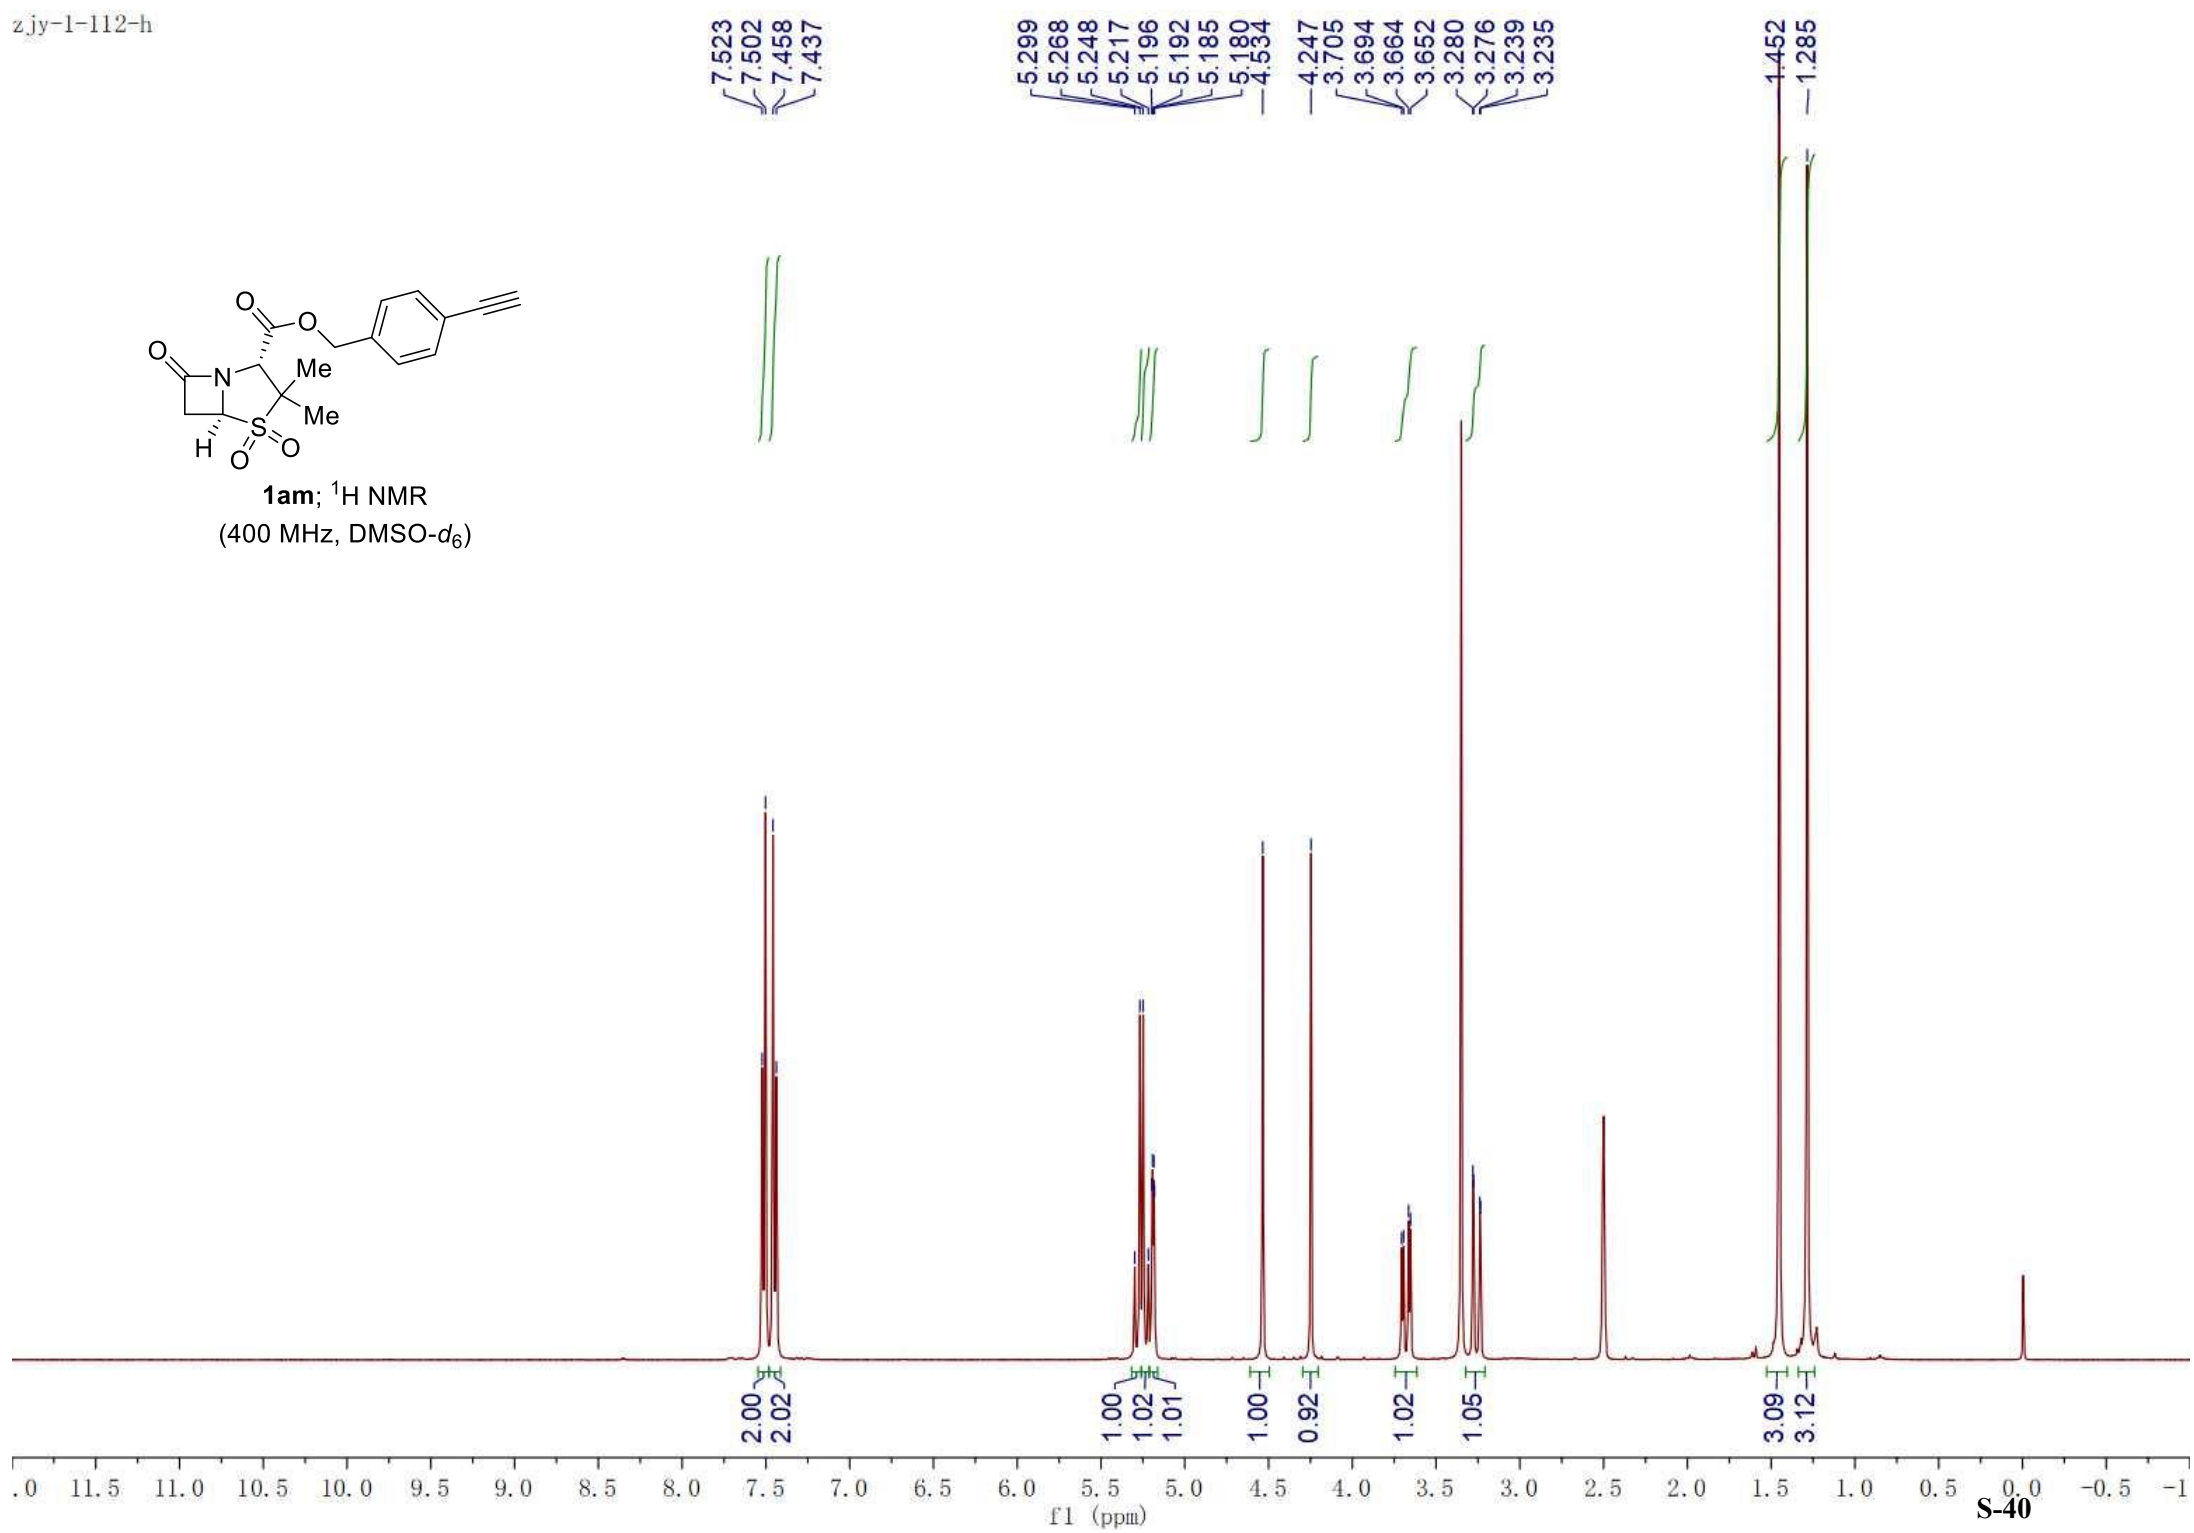

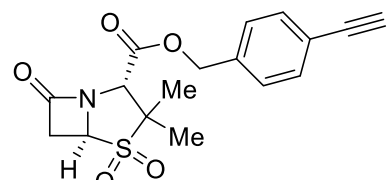

**1am**;  $^{13}\text{C}\{^1\text{H}\}$  NMR  
(101 MHz, DMSO- $d_6$ )

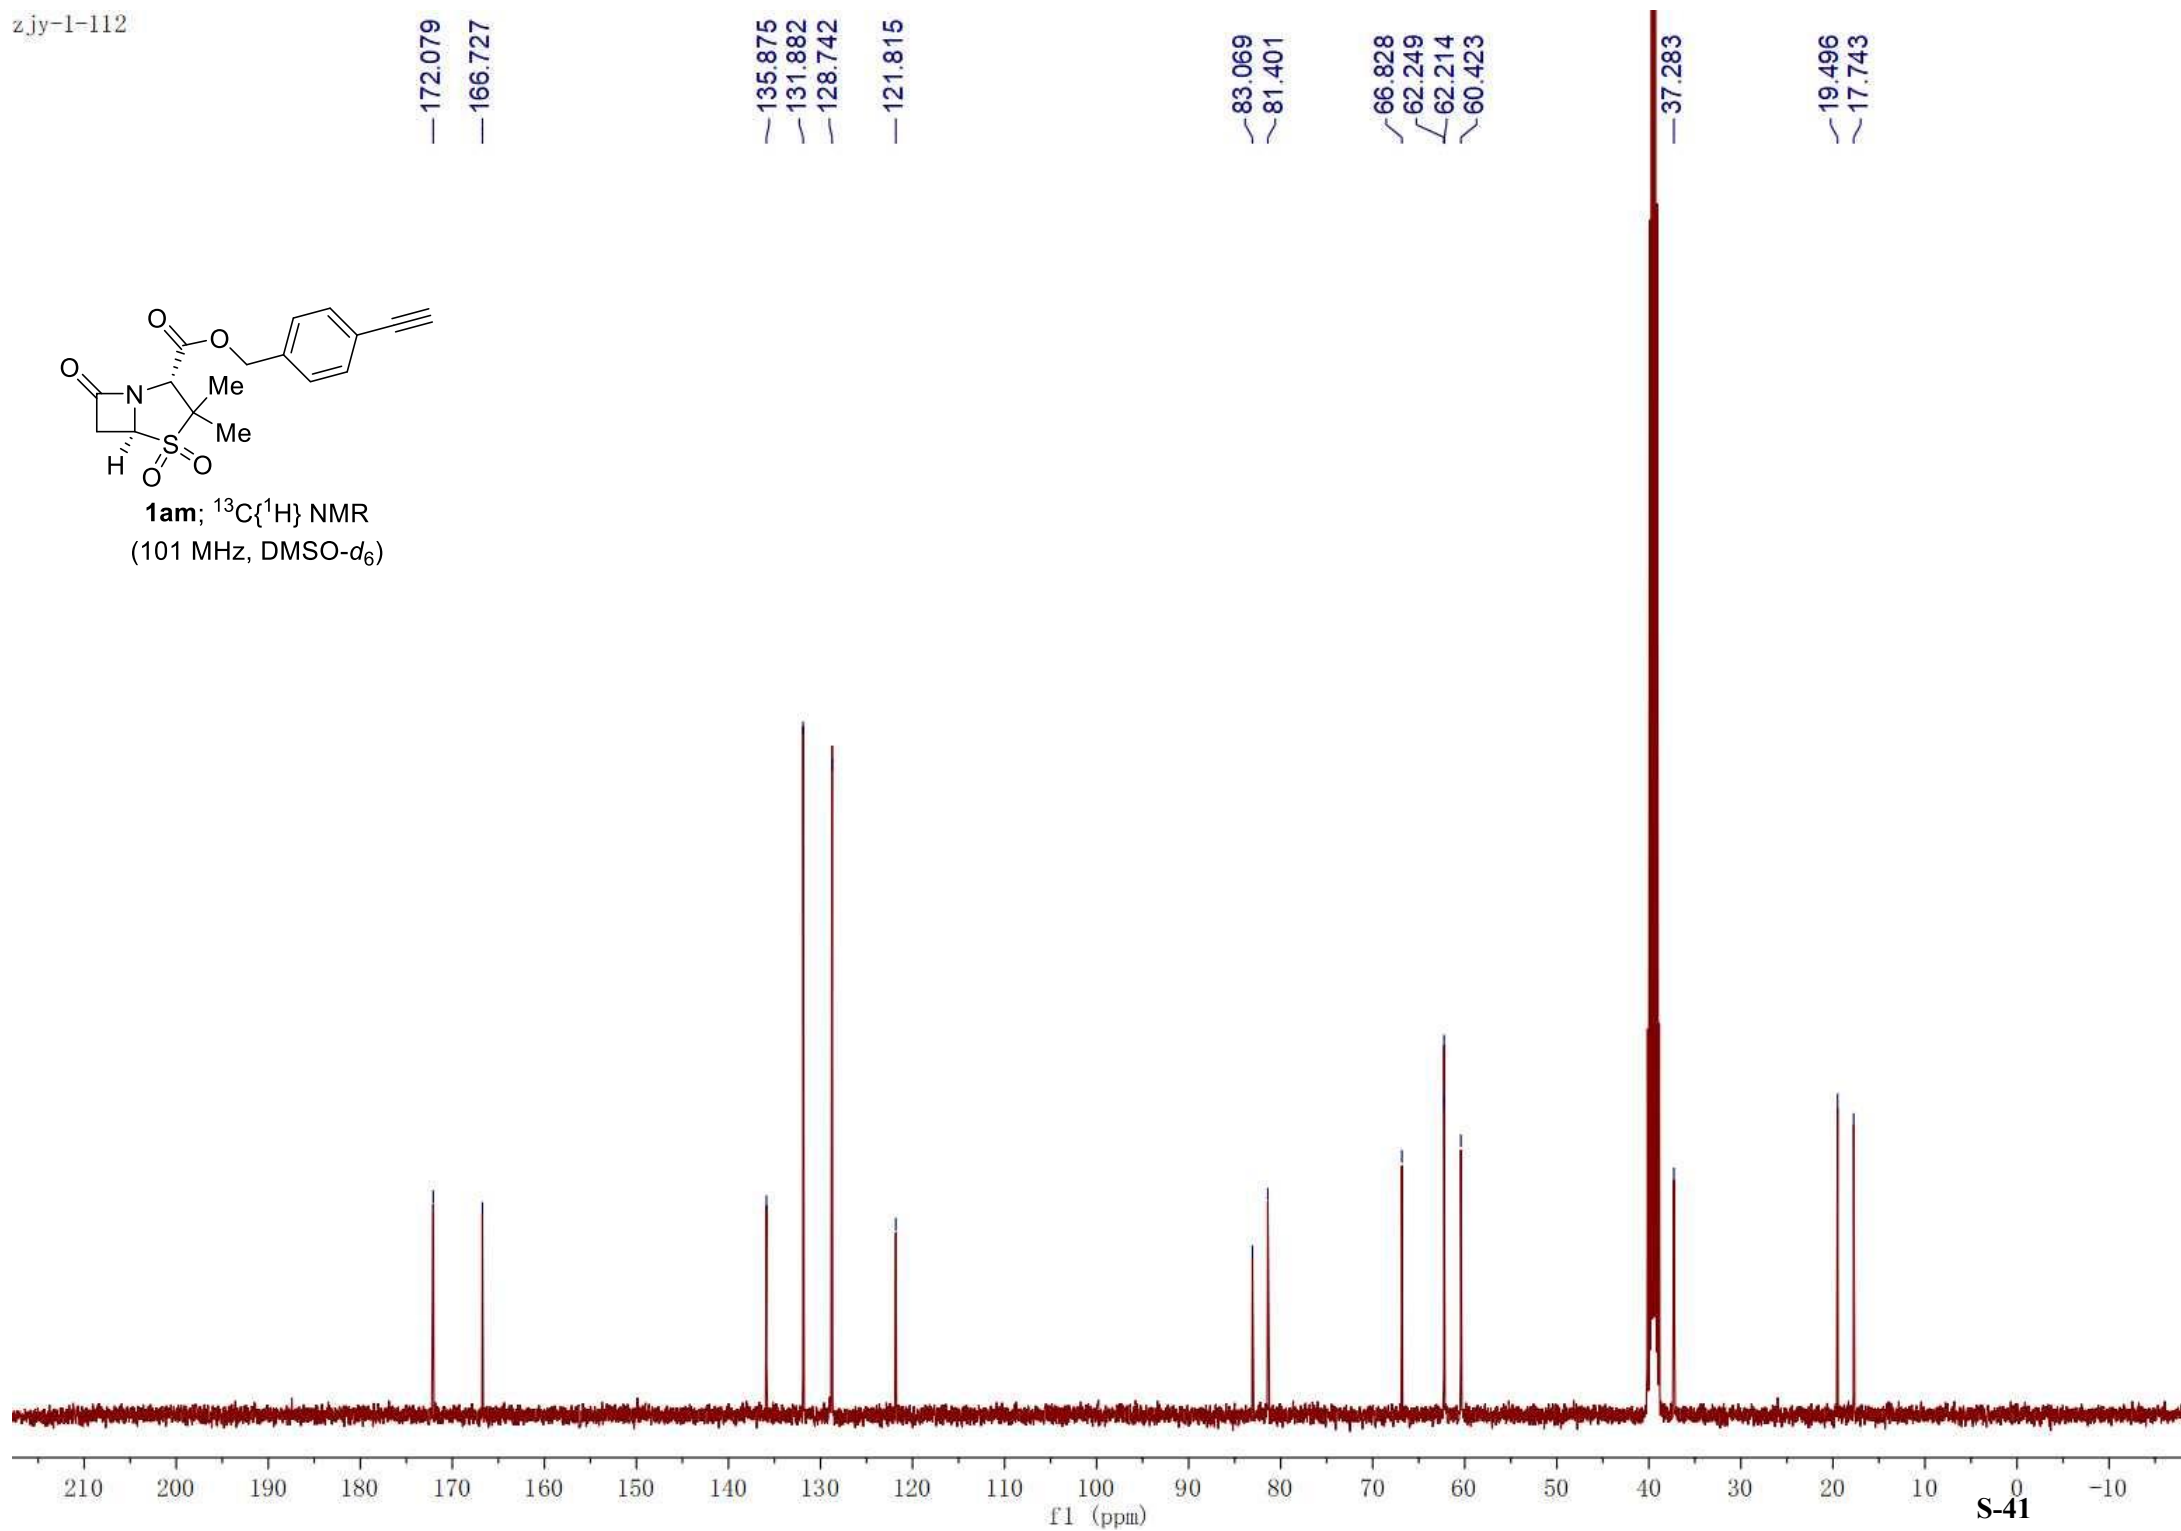

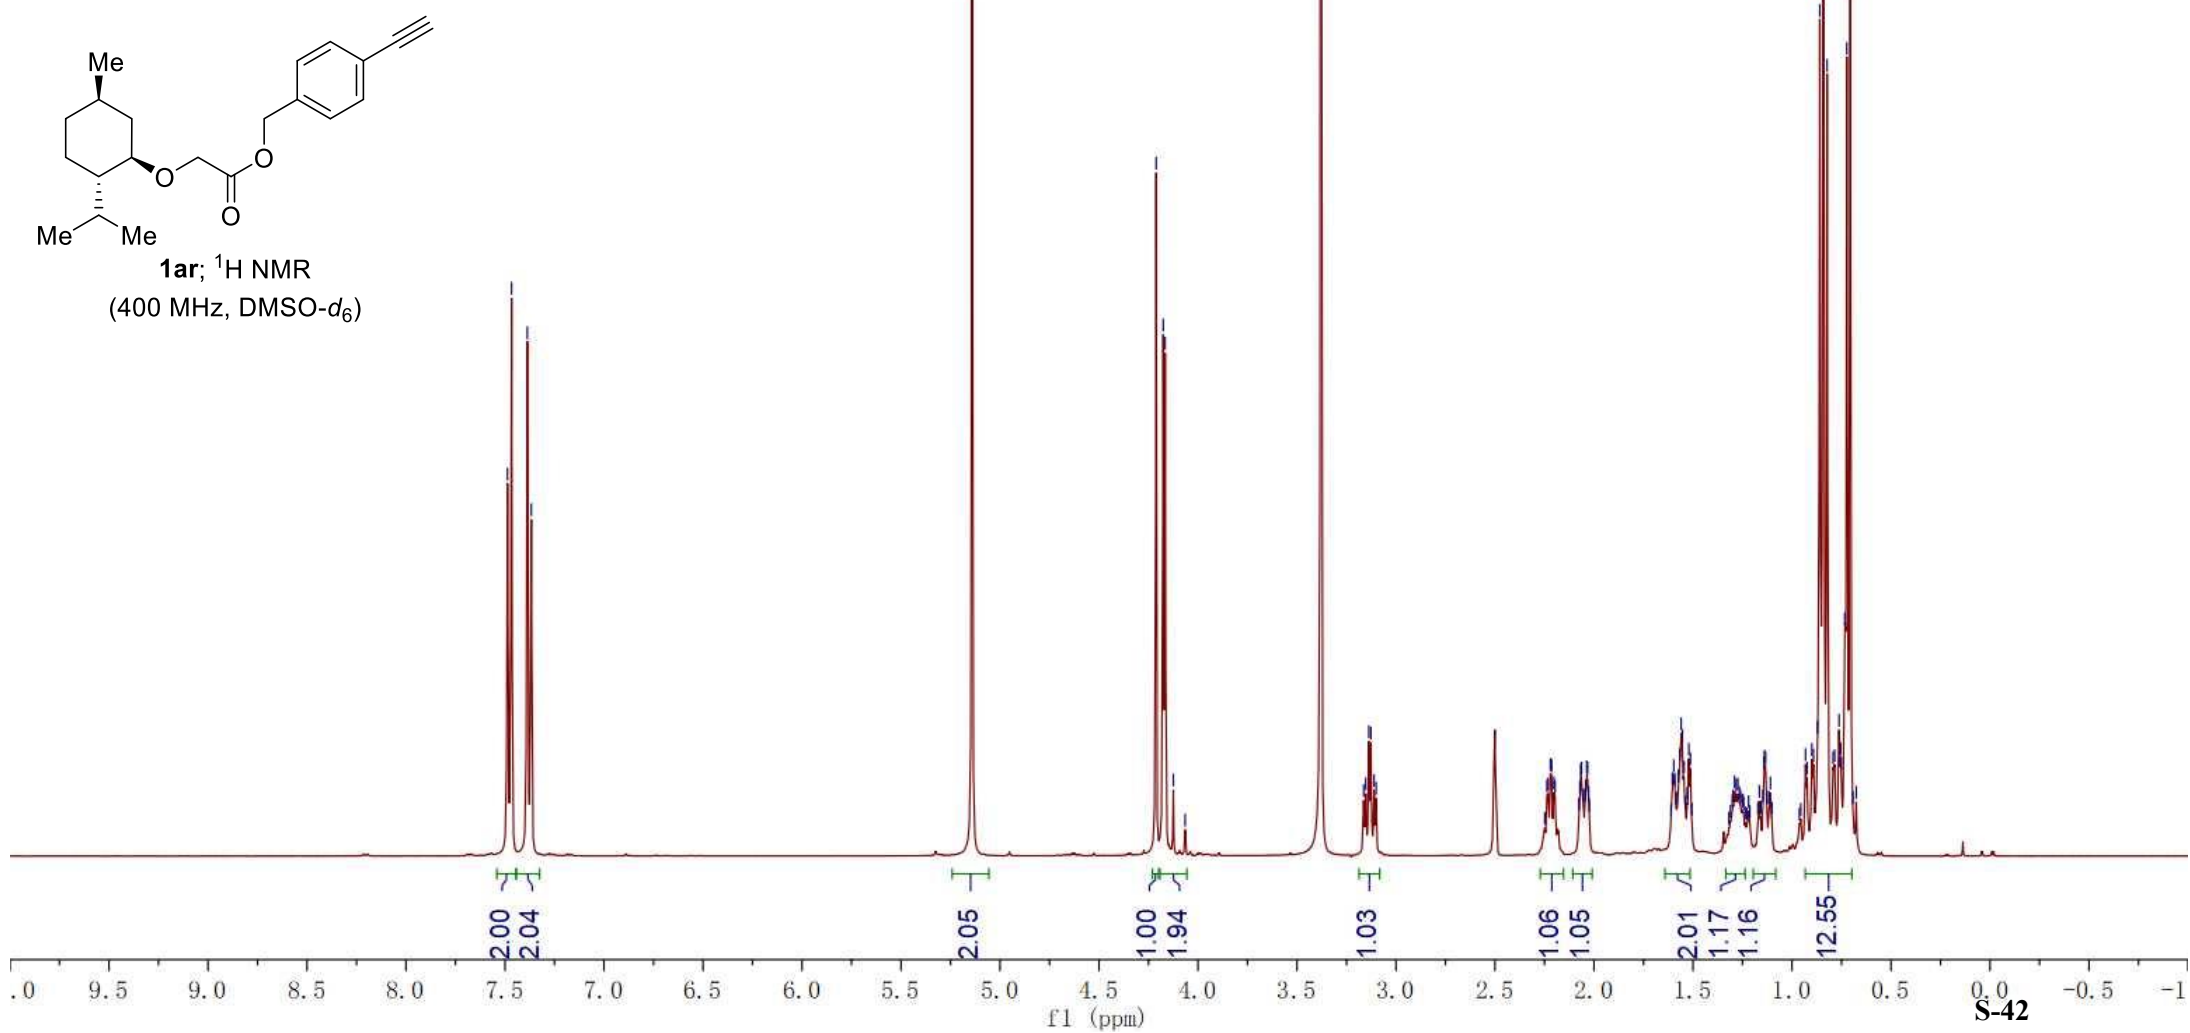

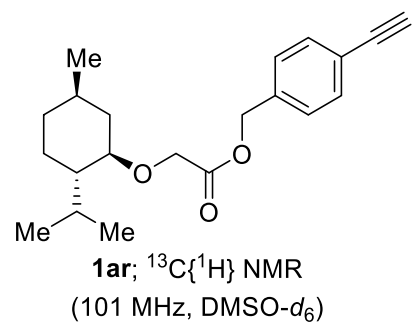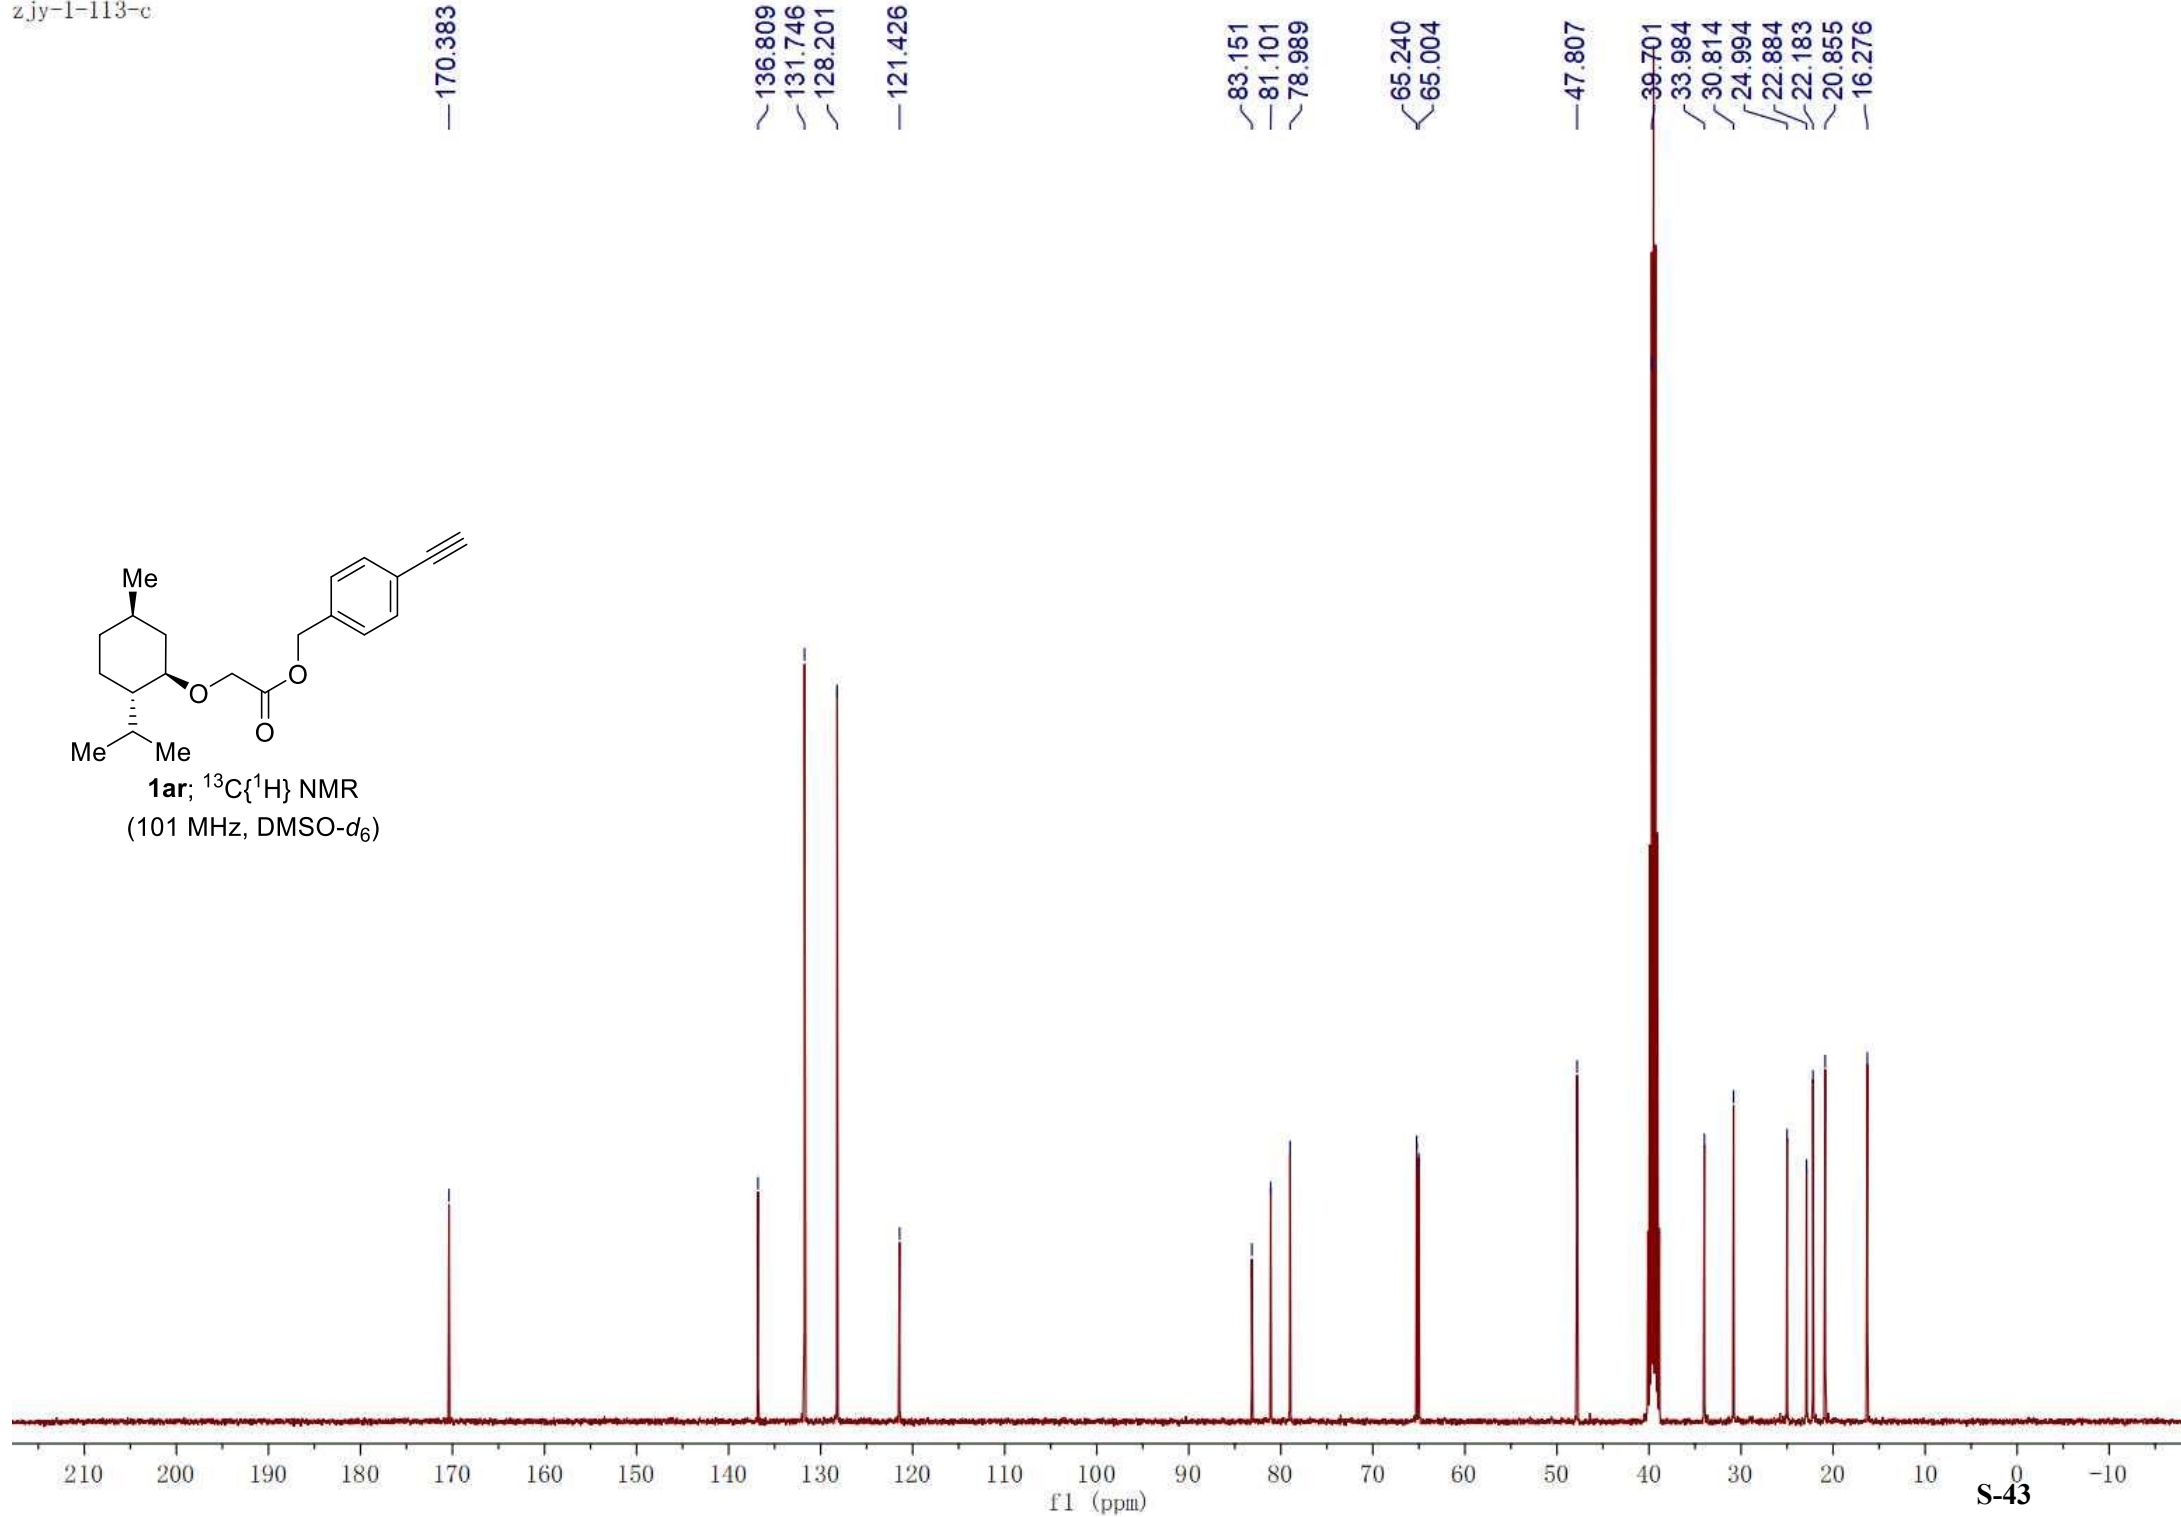

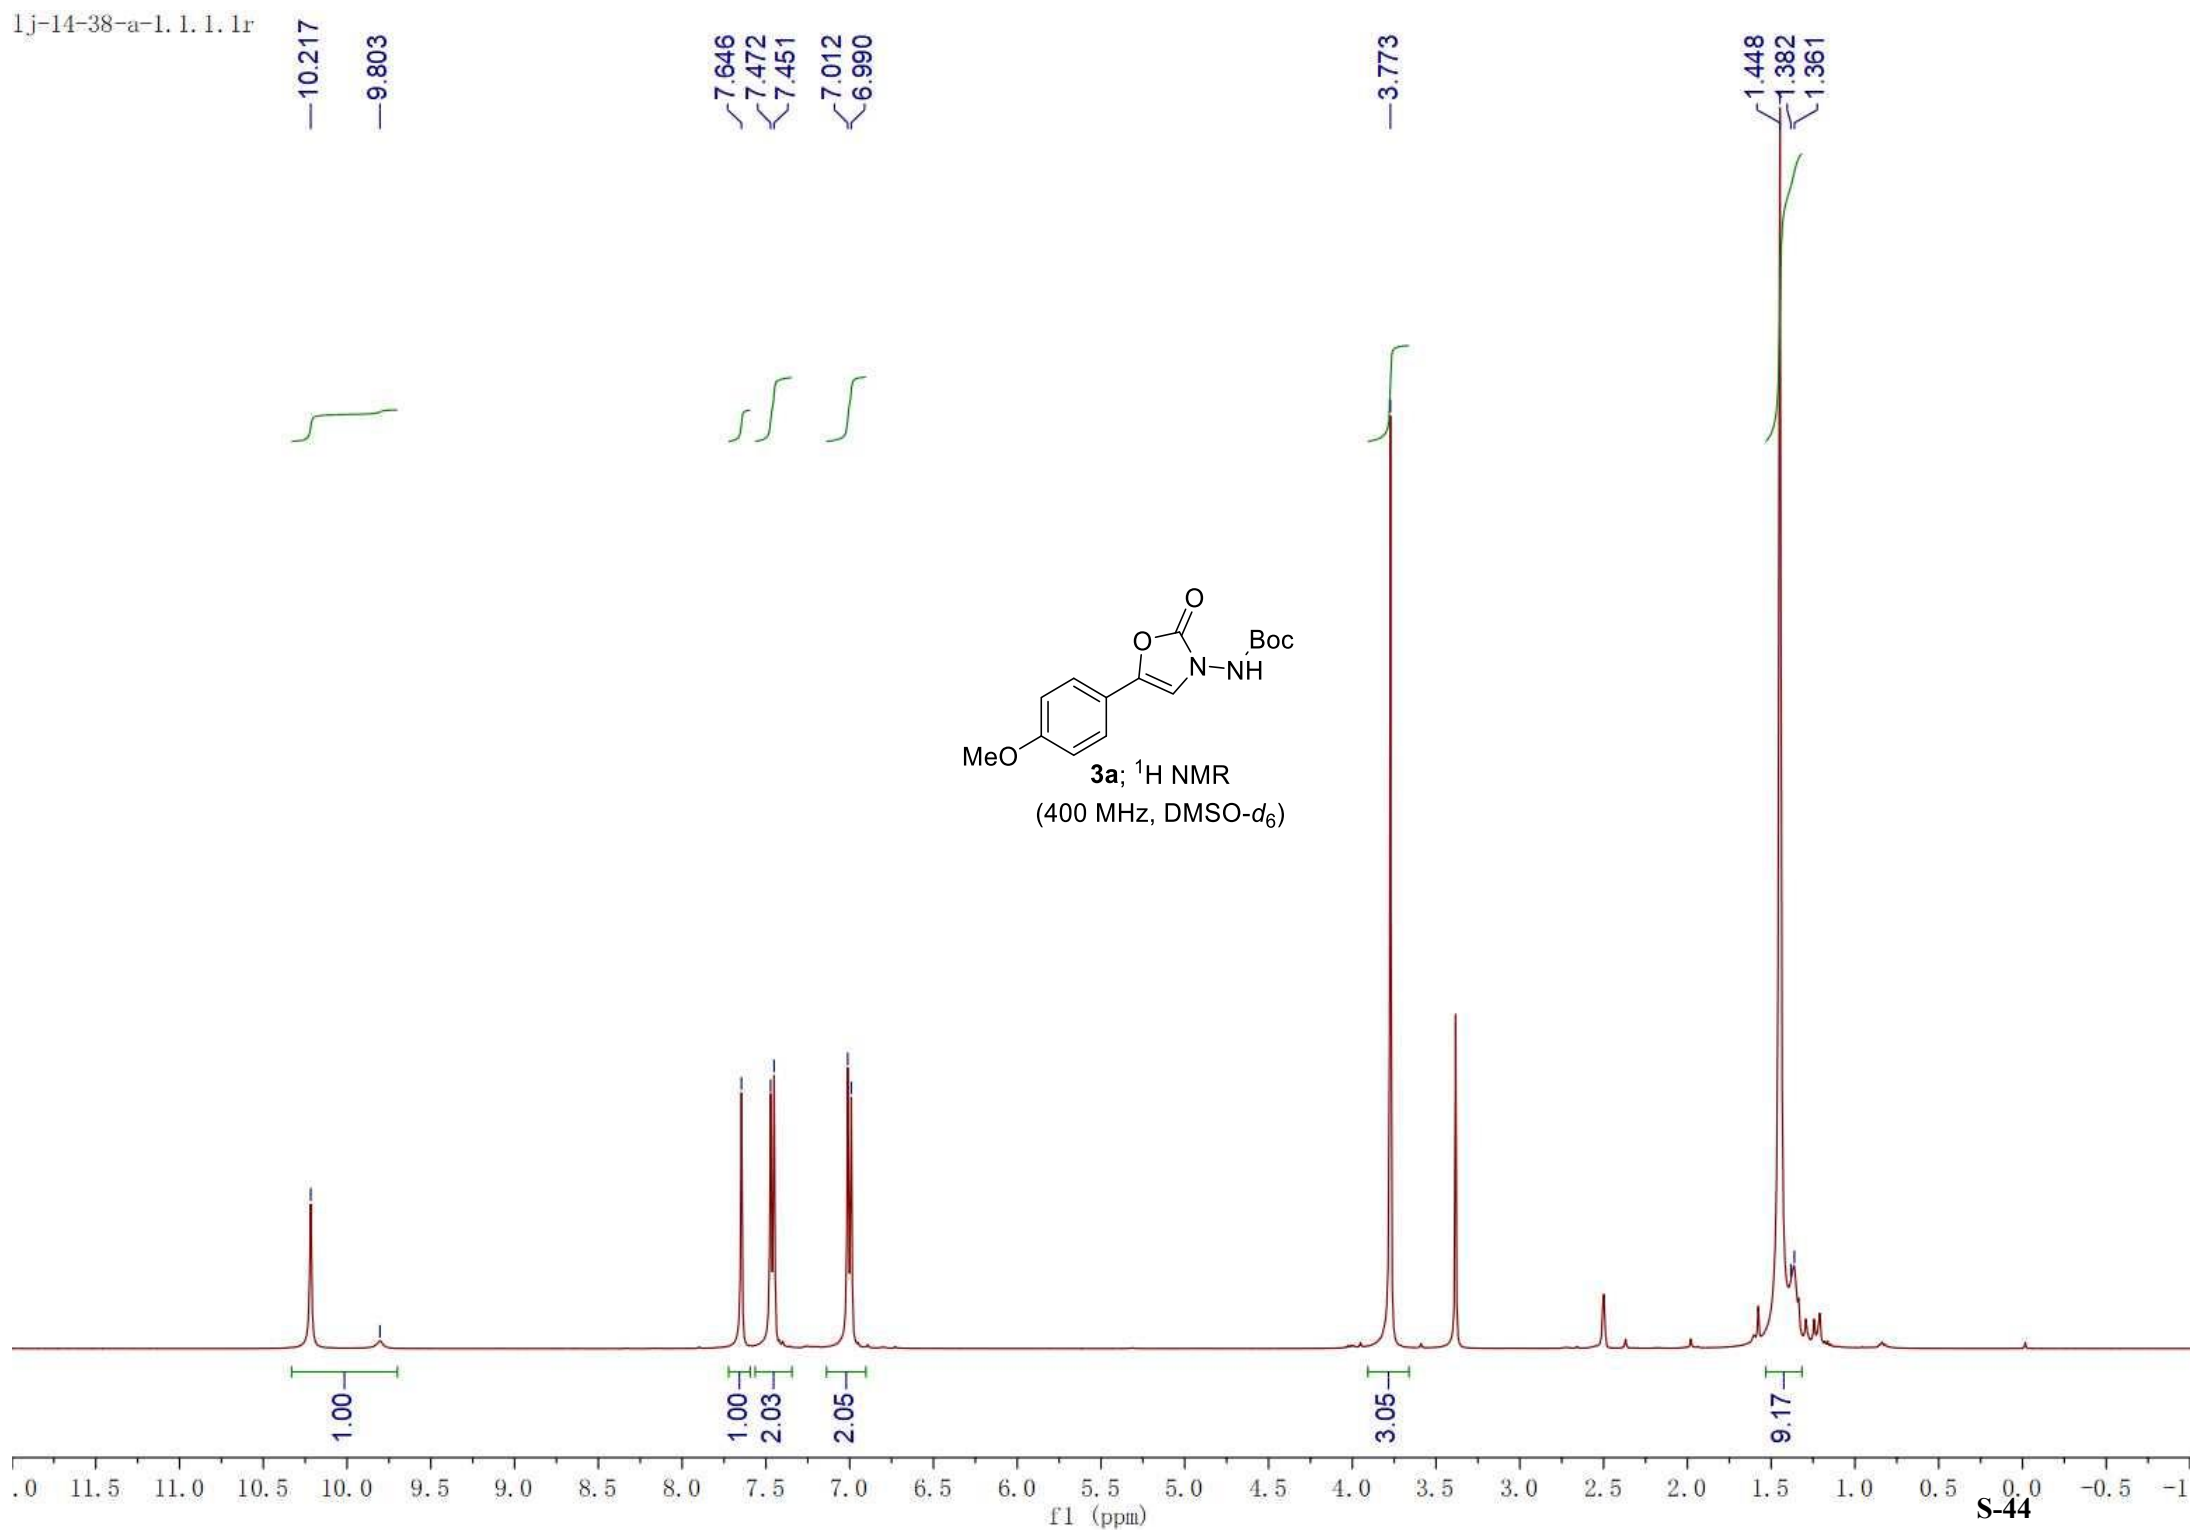



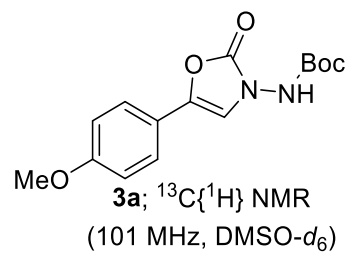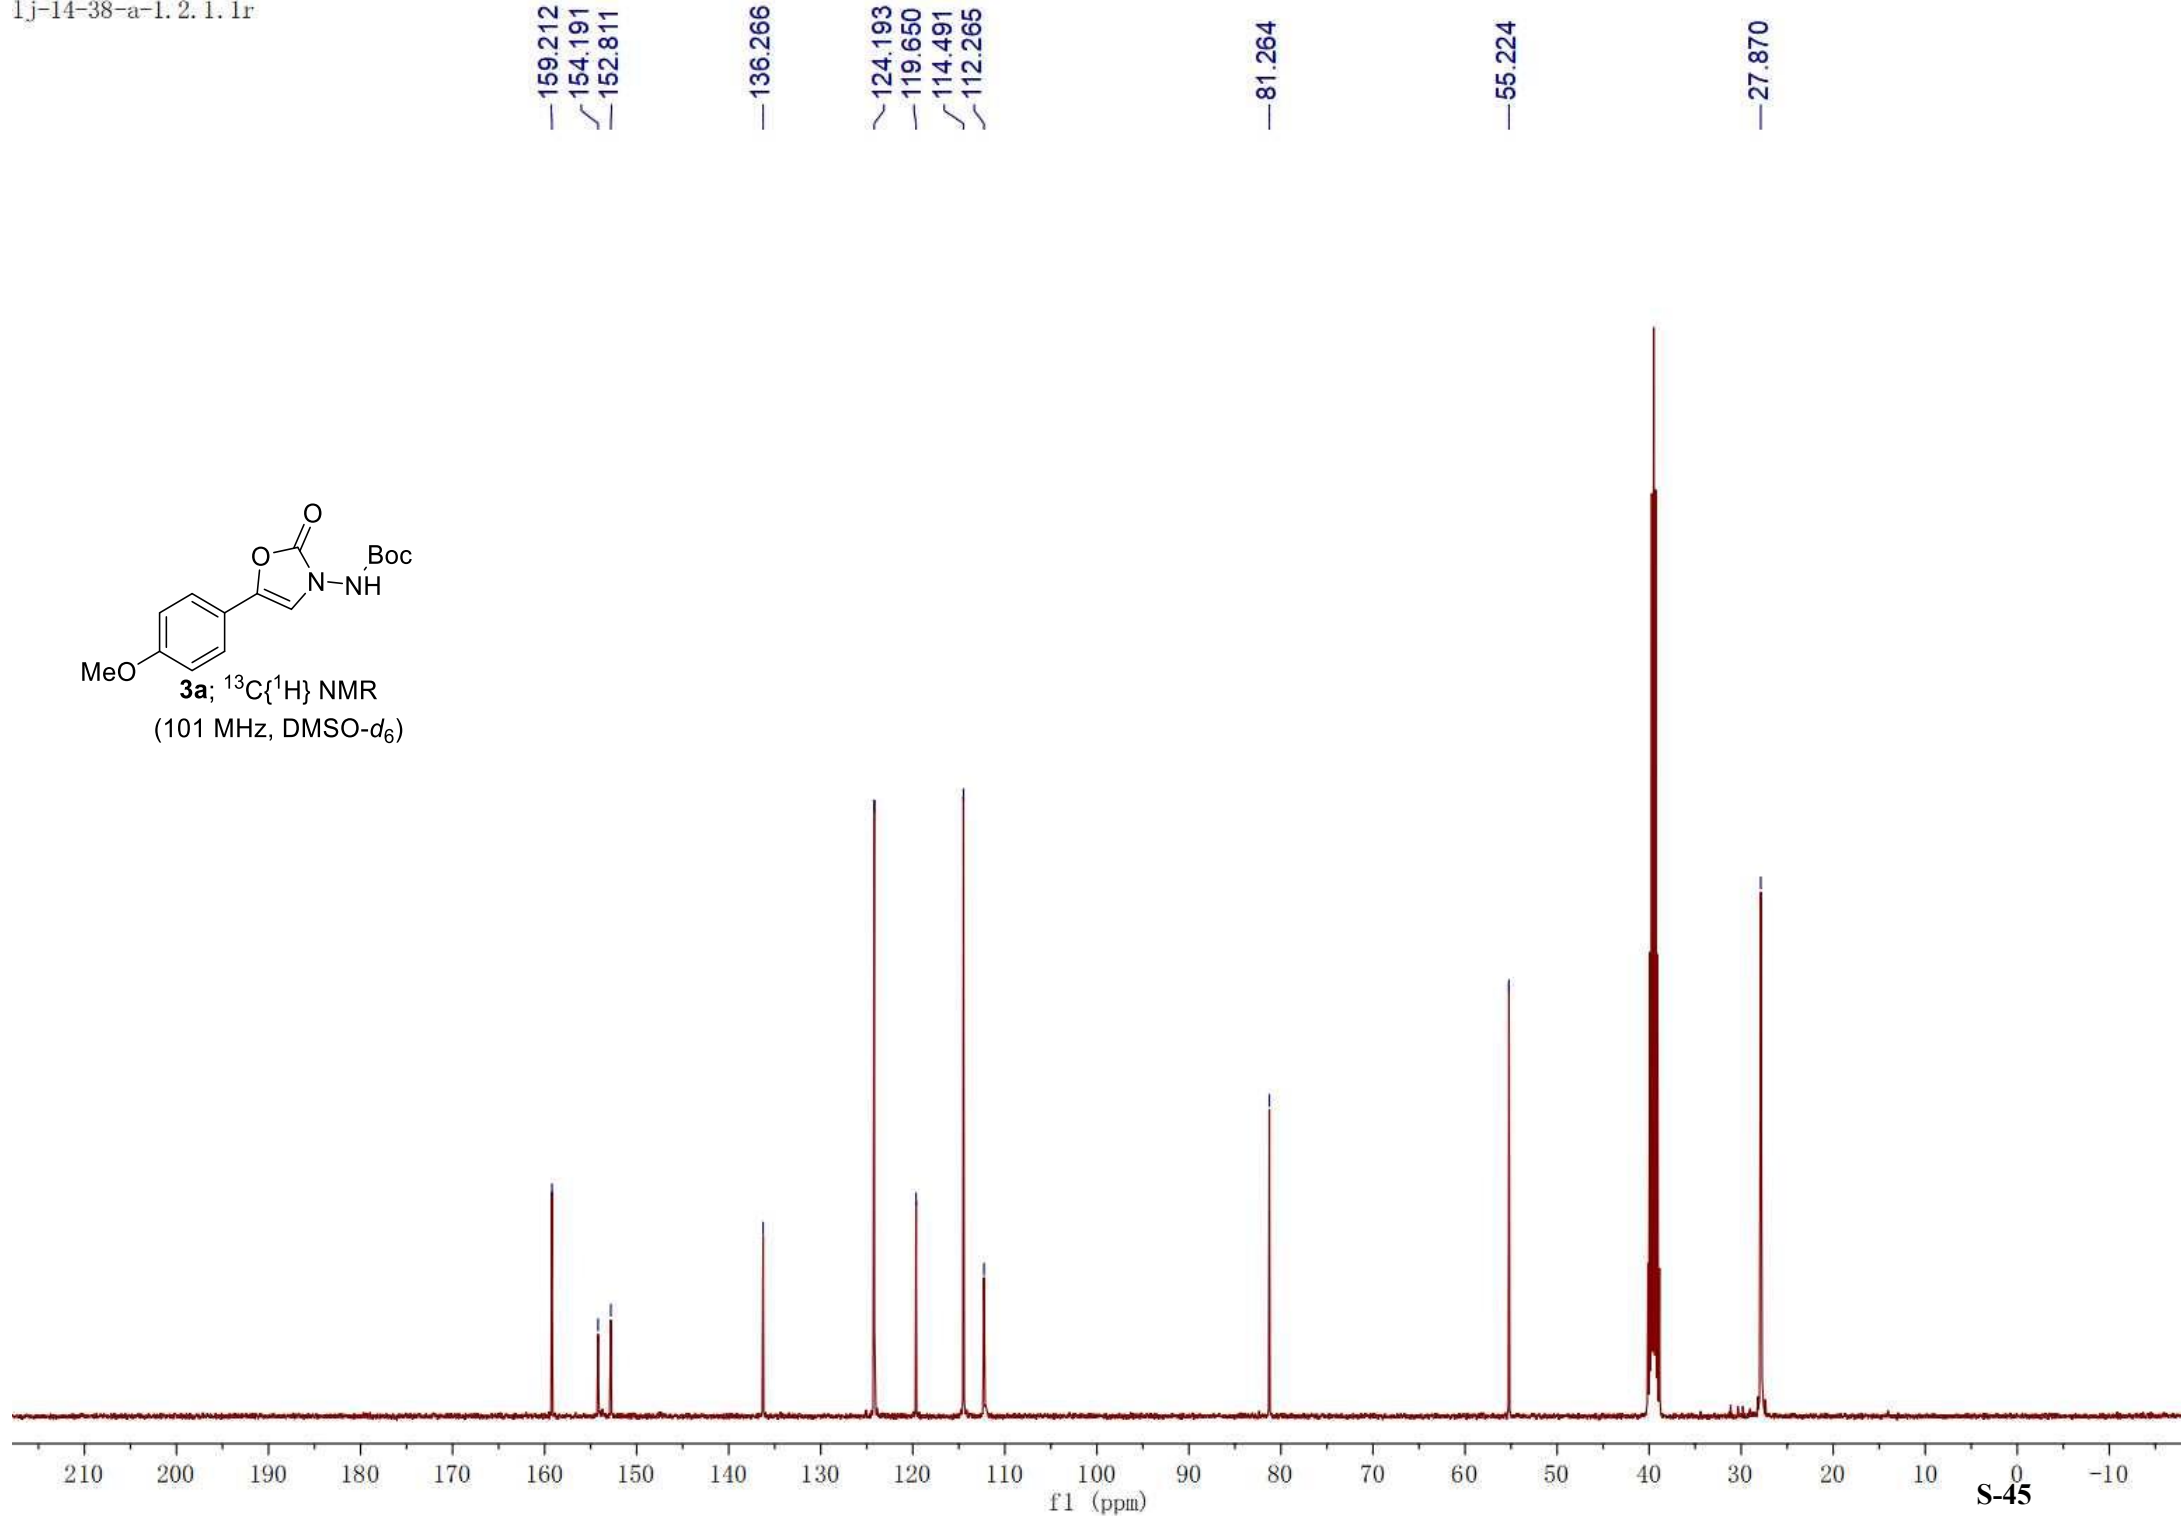

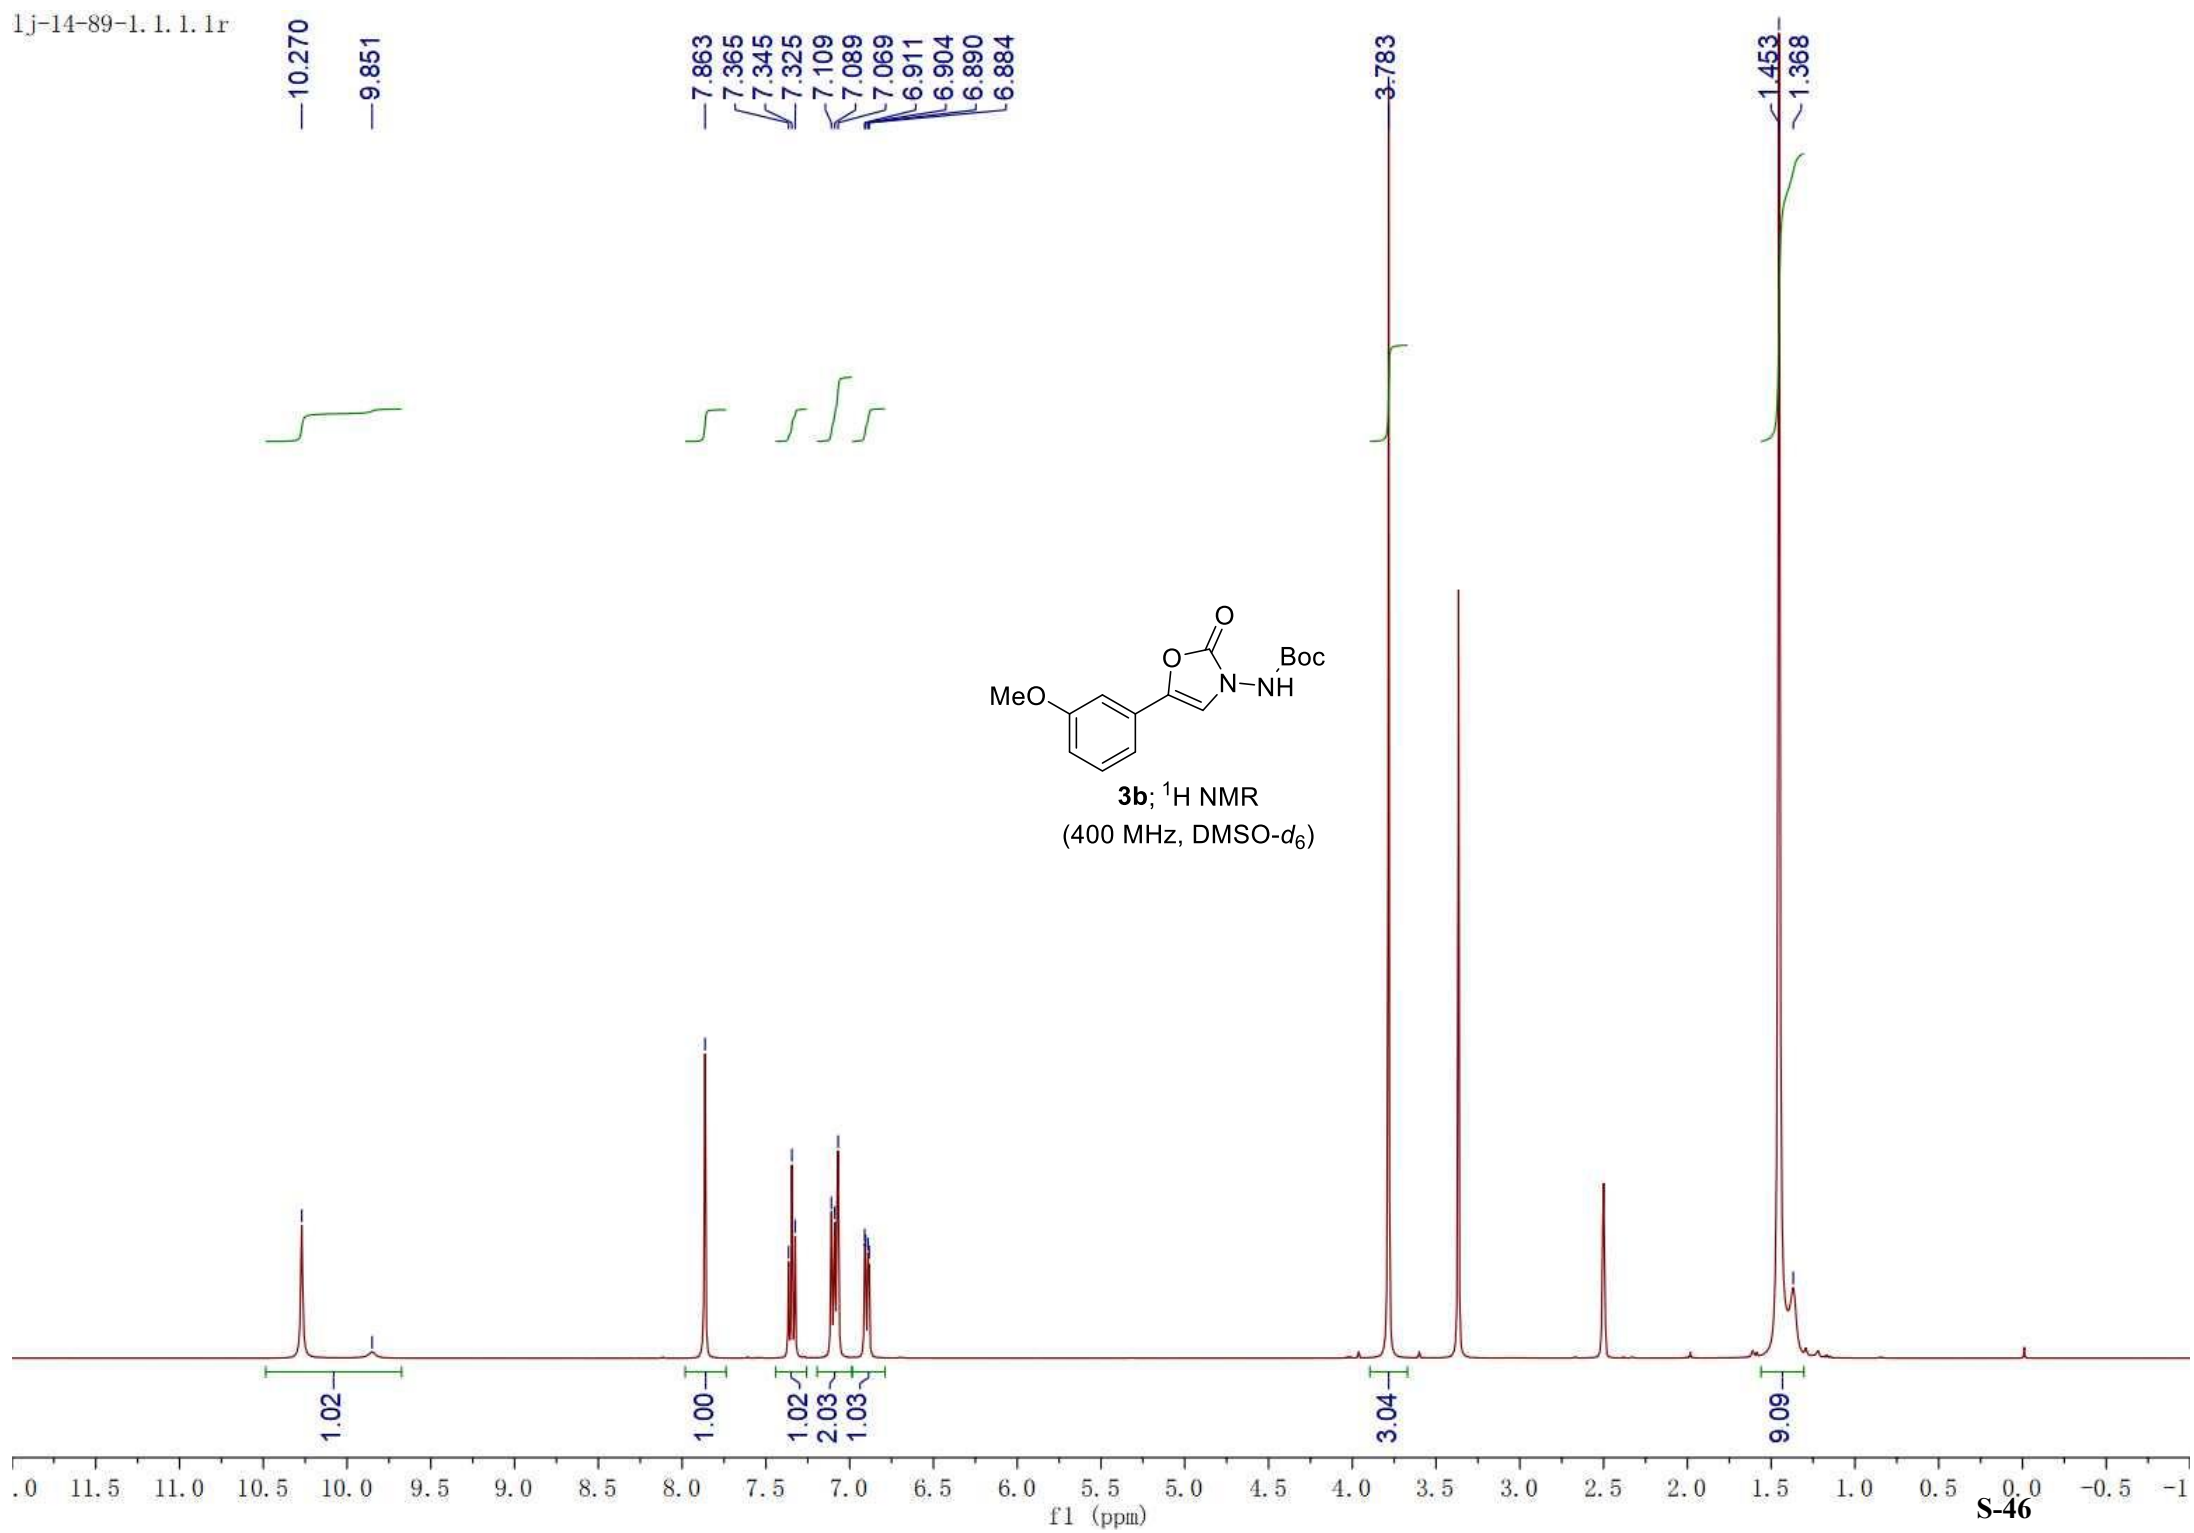

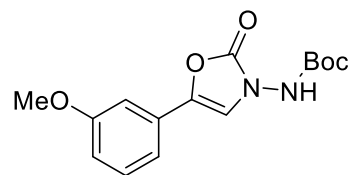

**3b**;  $^{13}\text{C}\{^1\text{H}\}$  NMR  
(101 MHz, DMSO- $d_6$ )

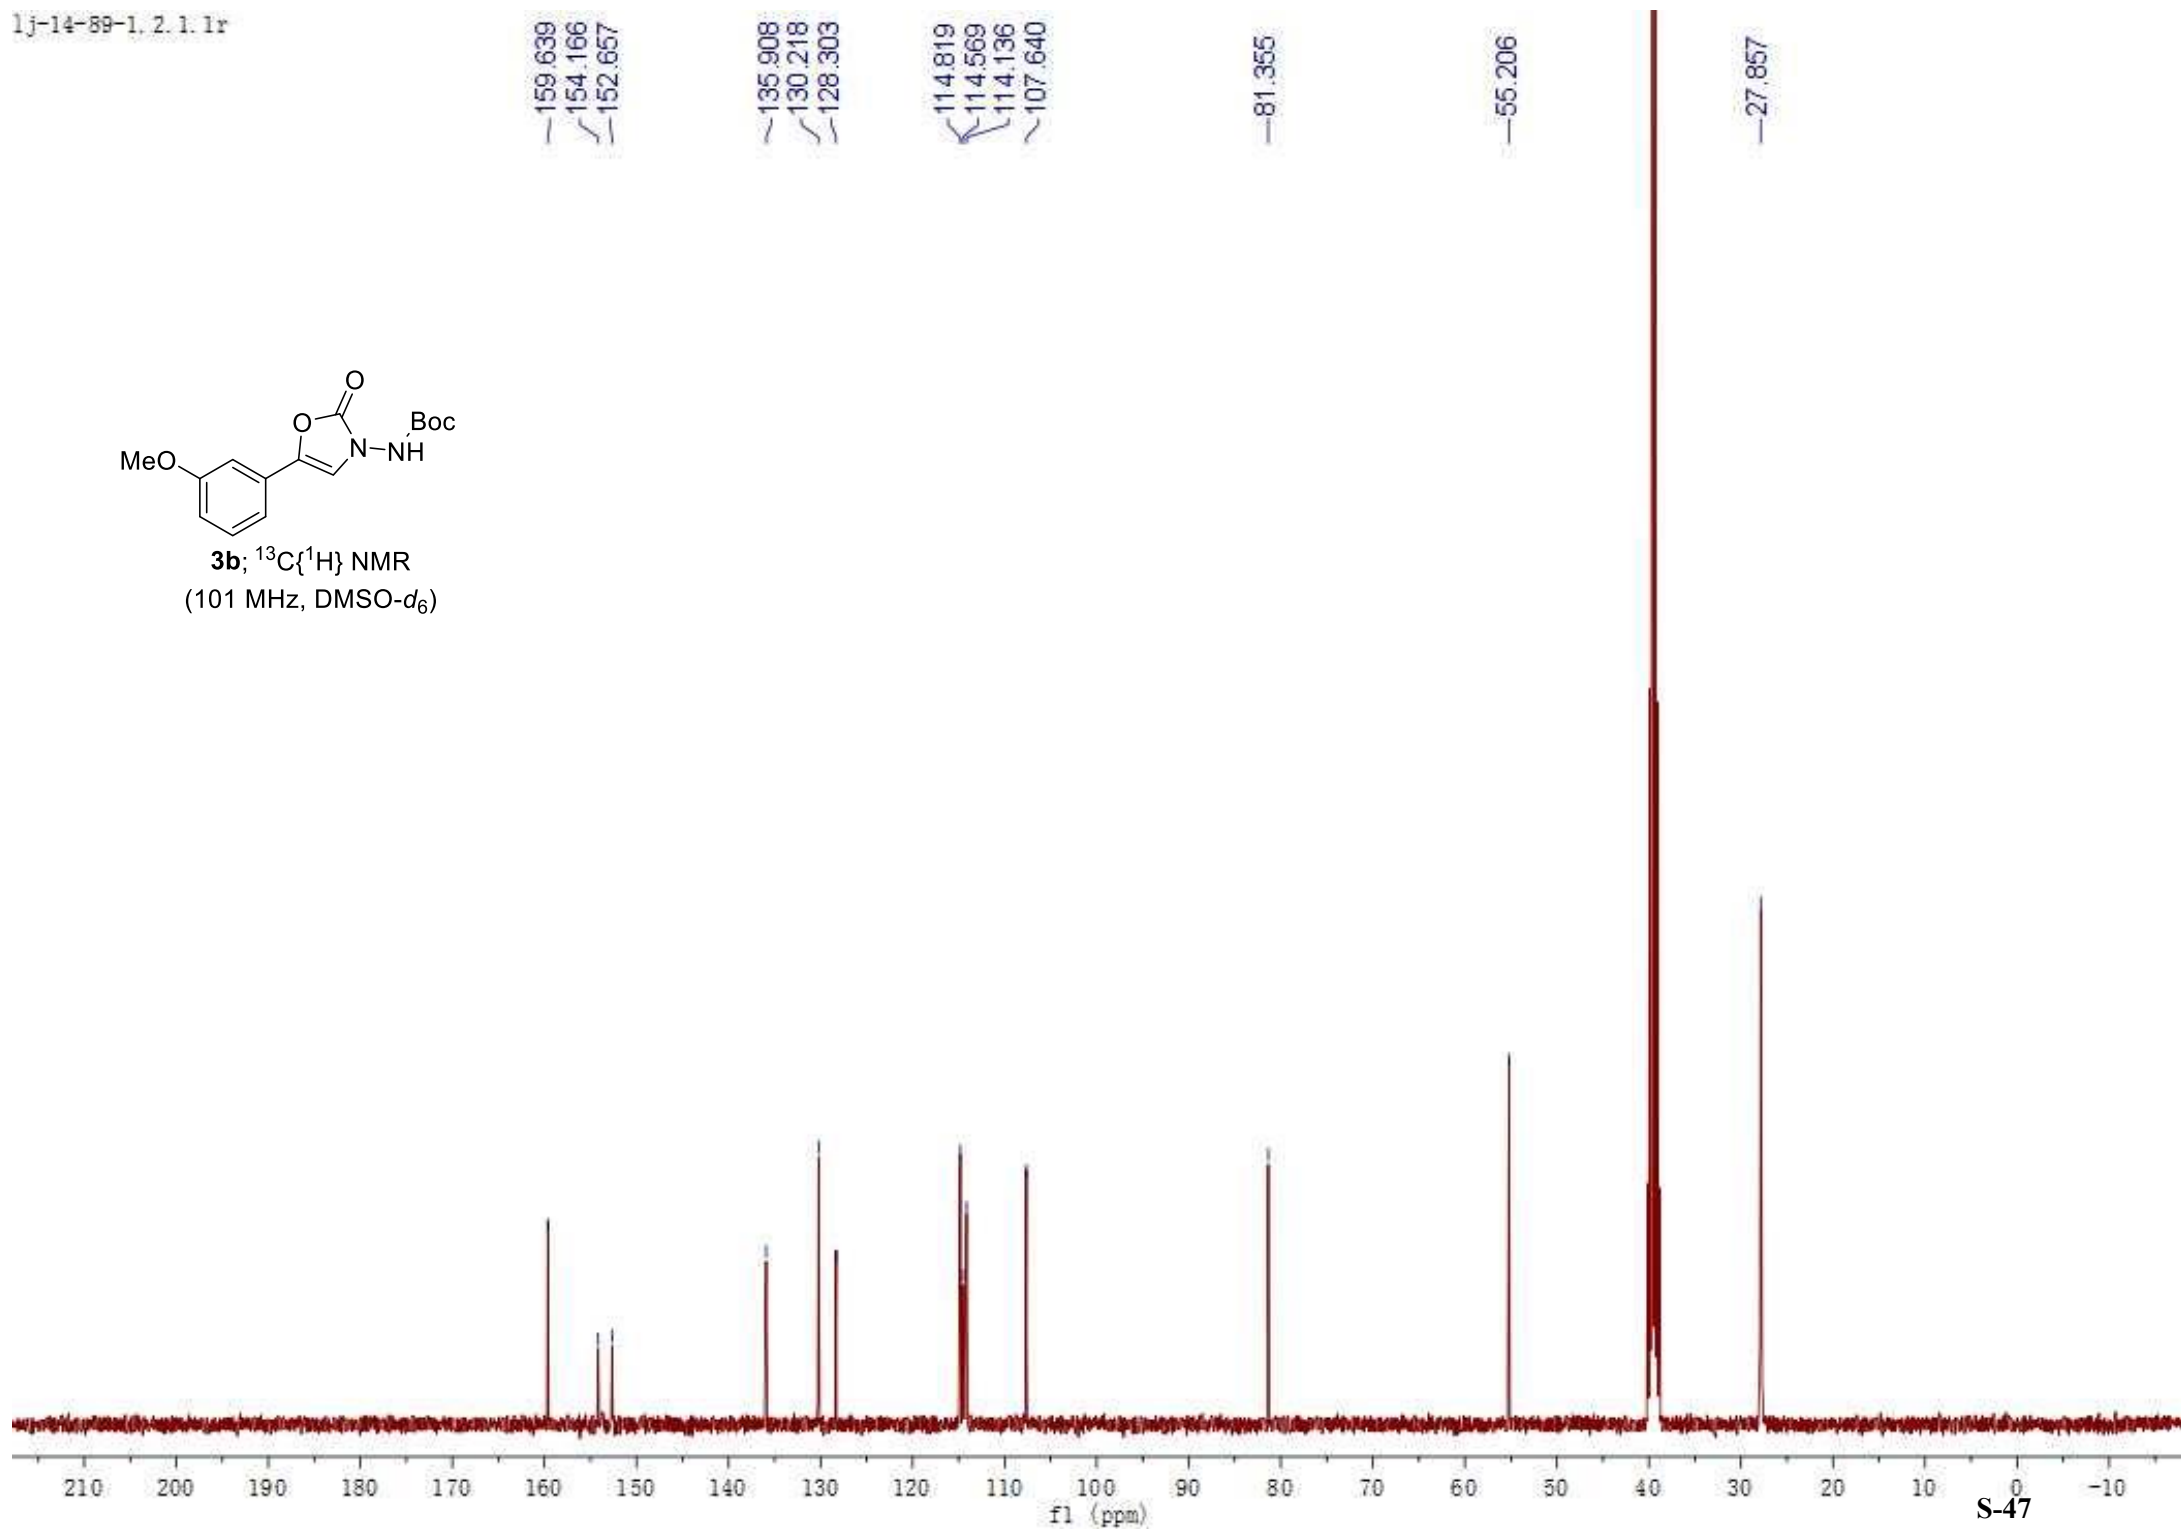

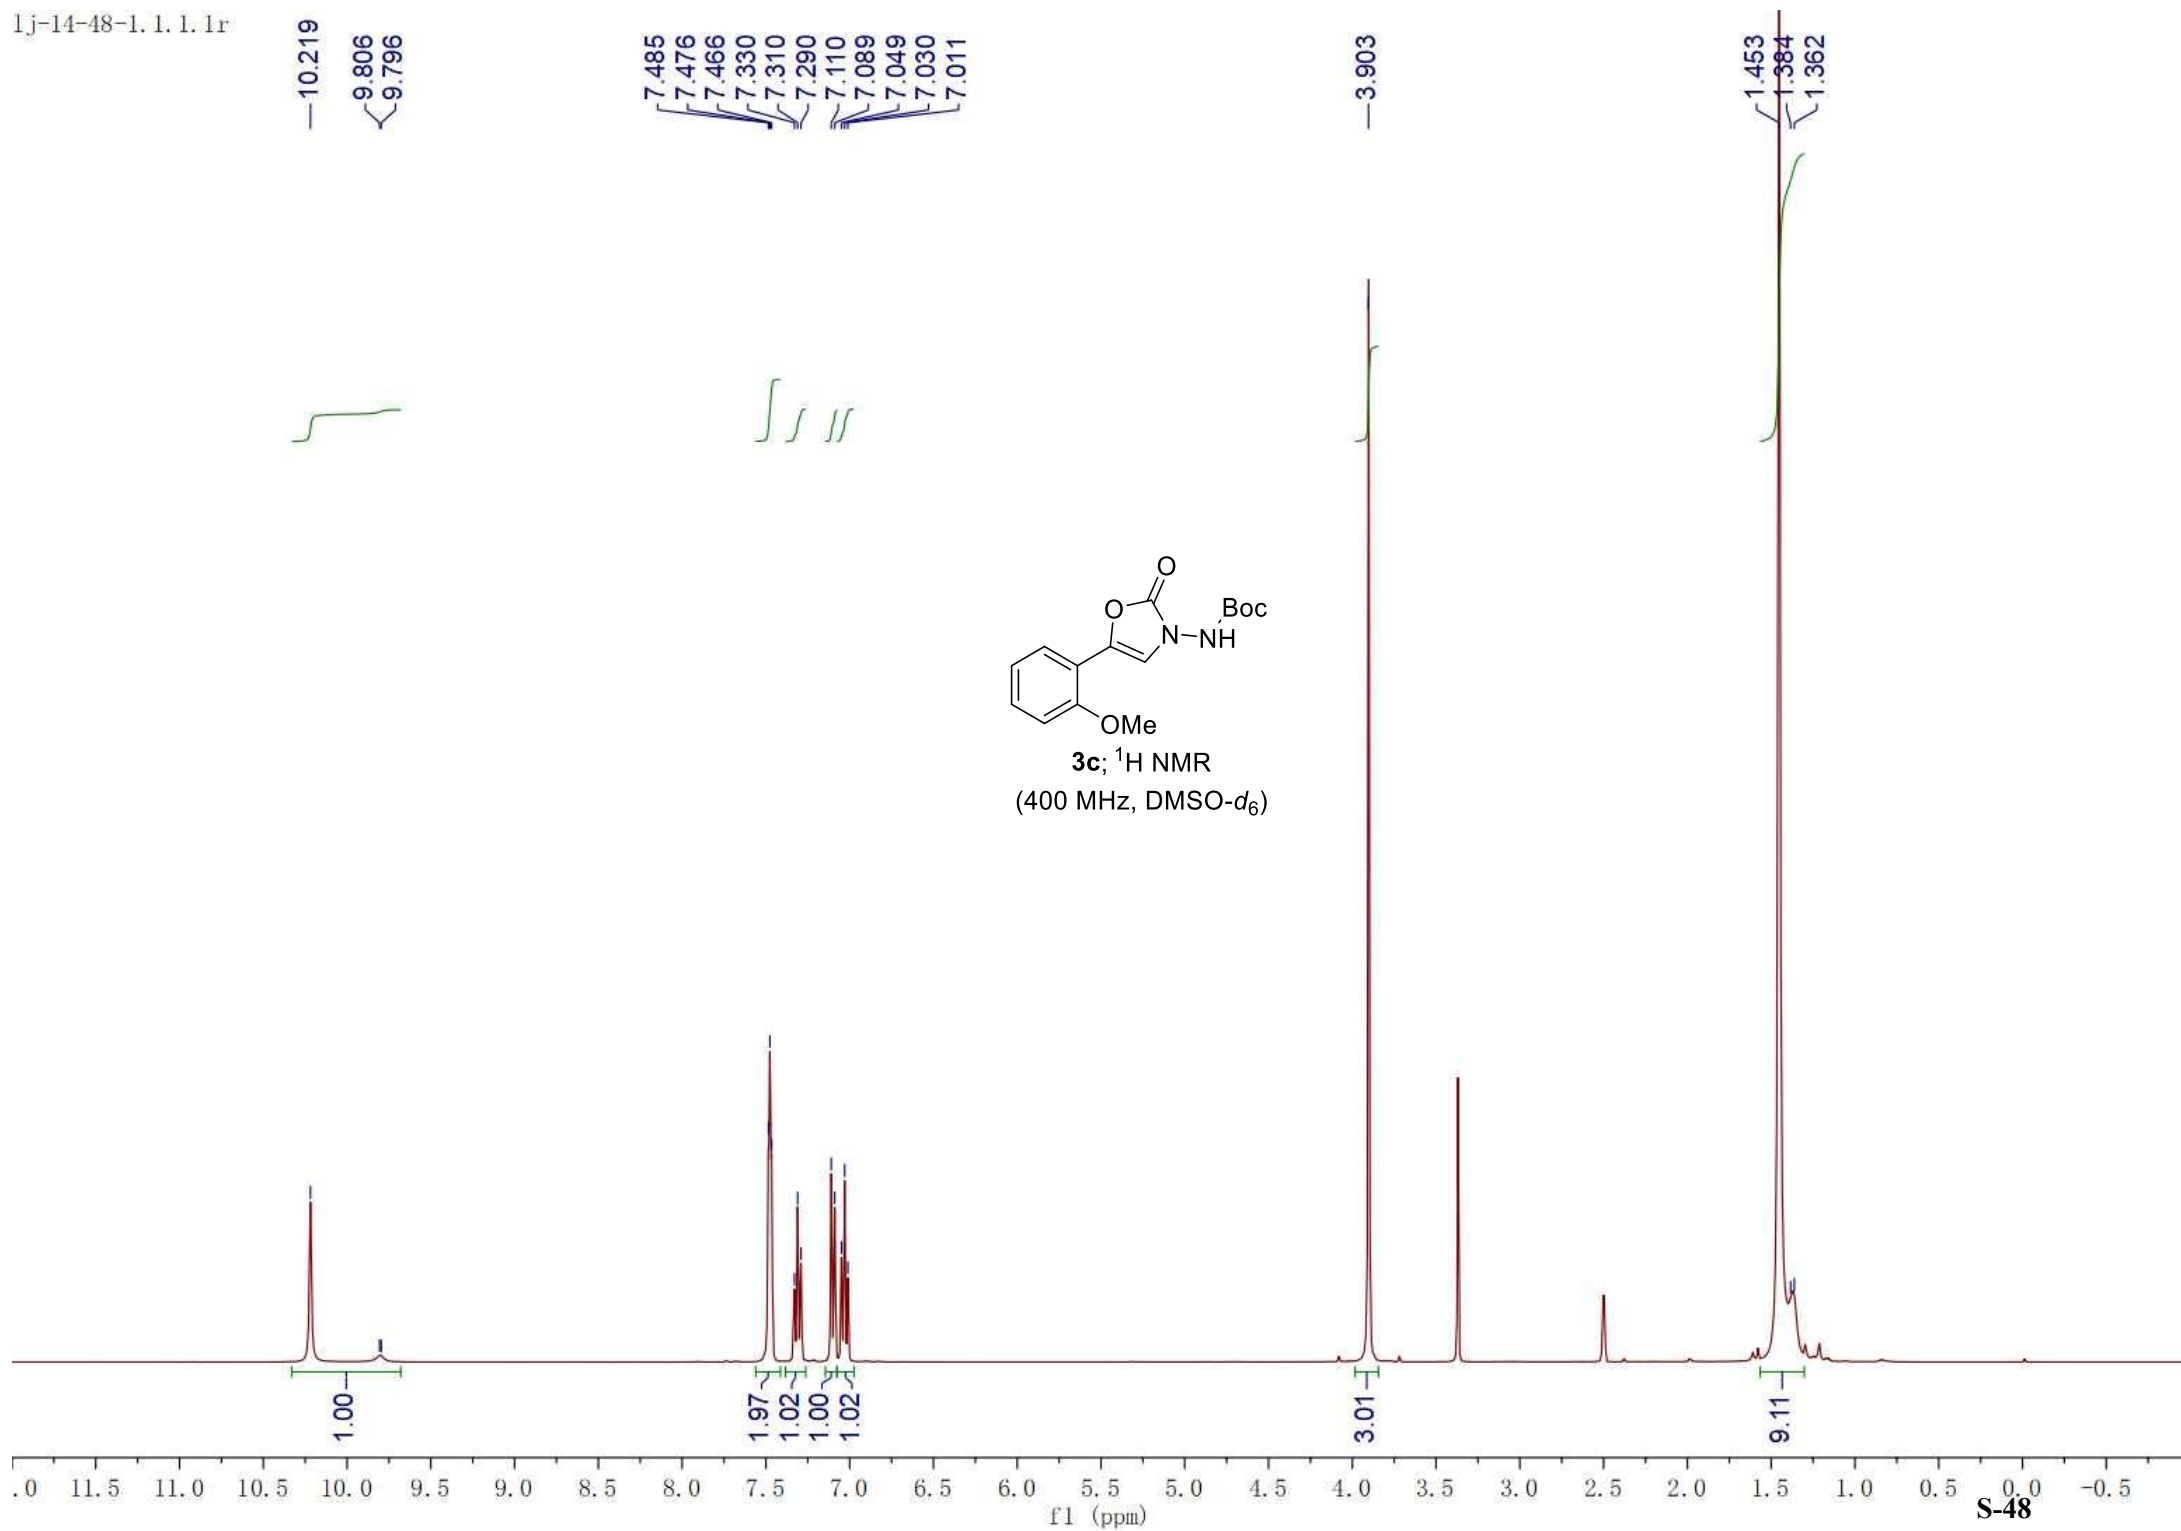

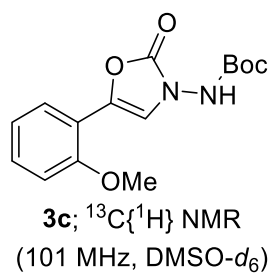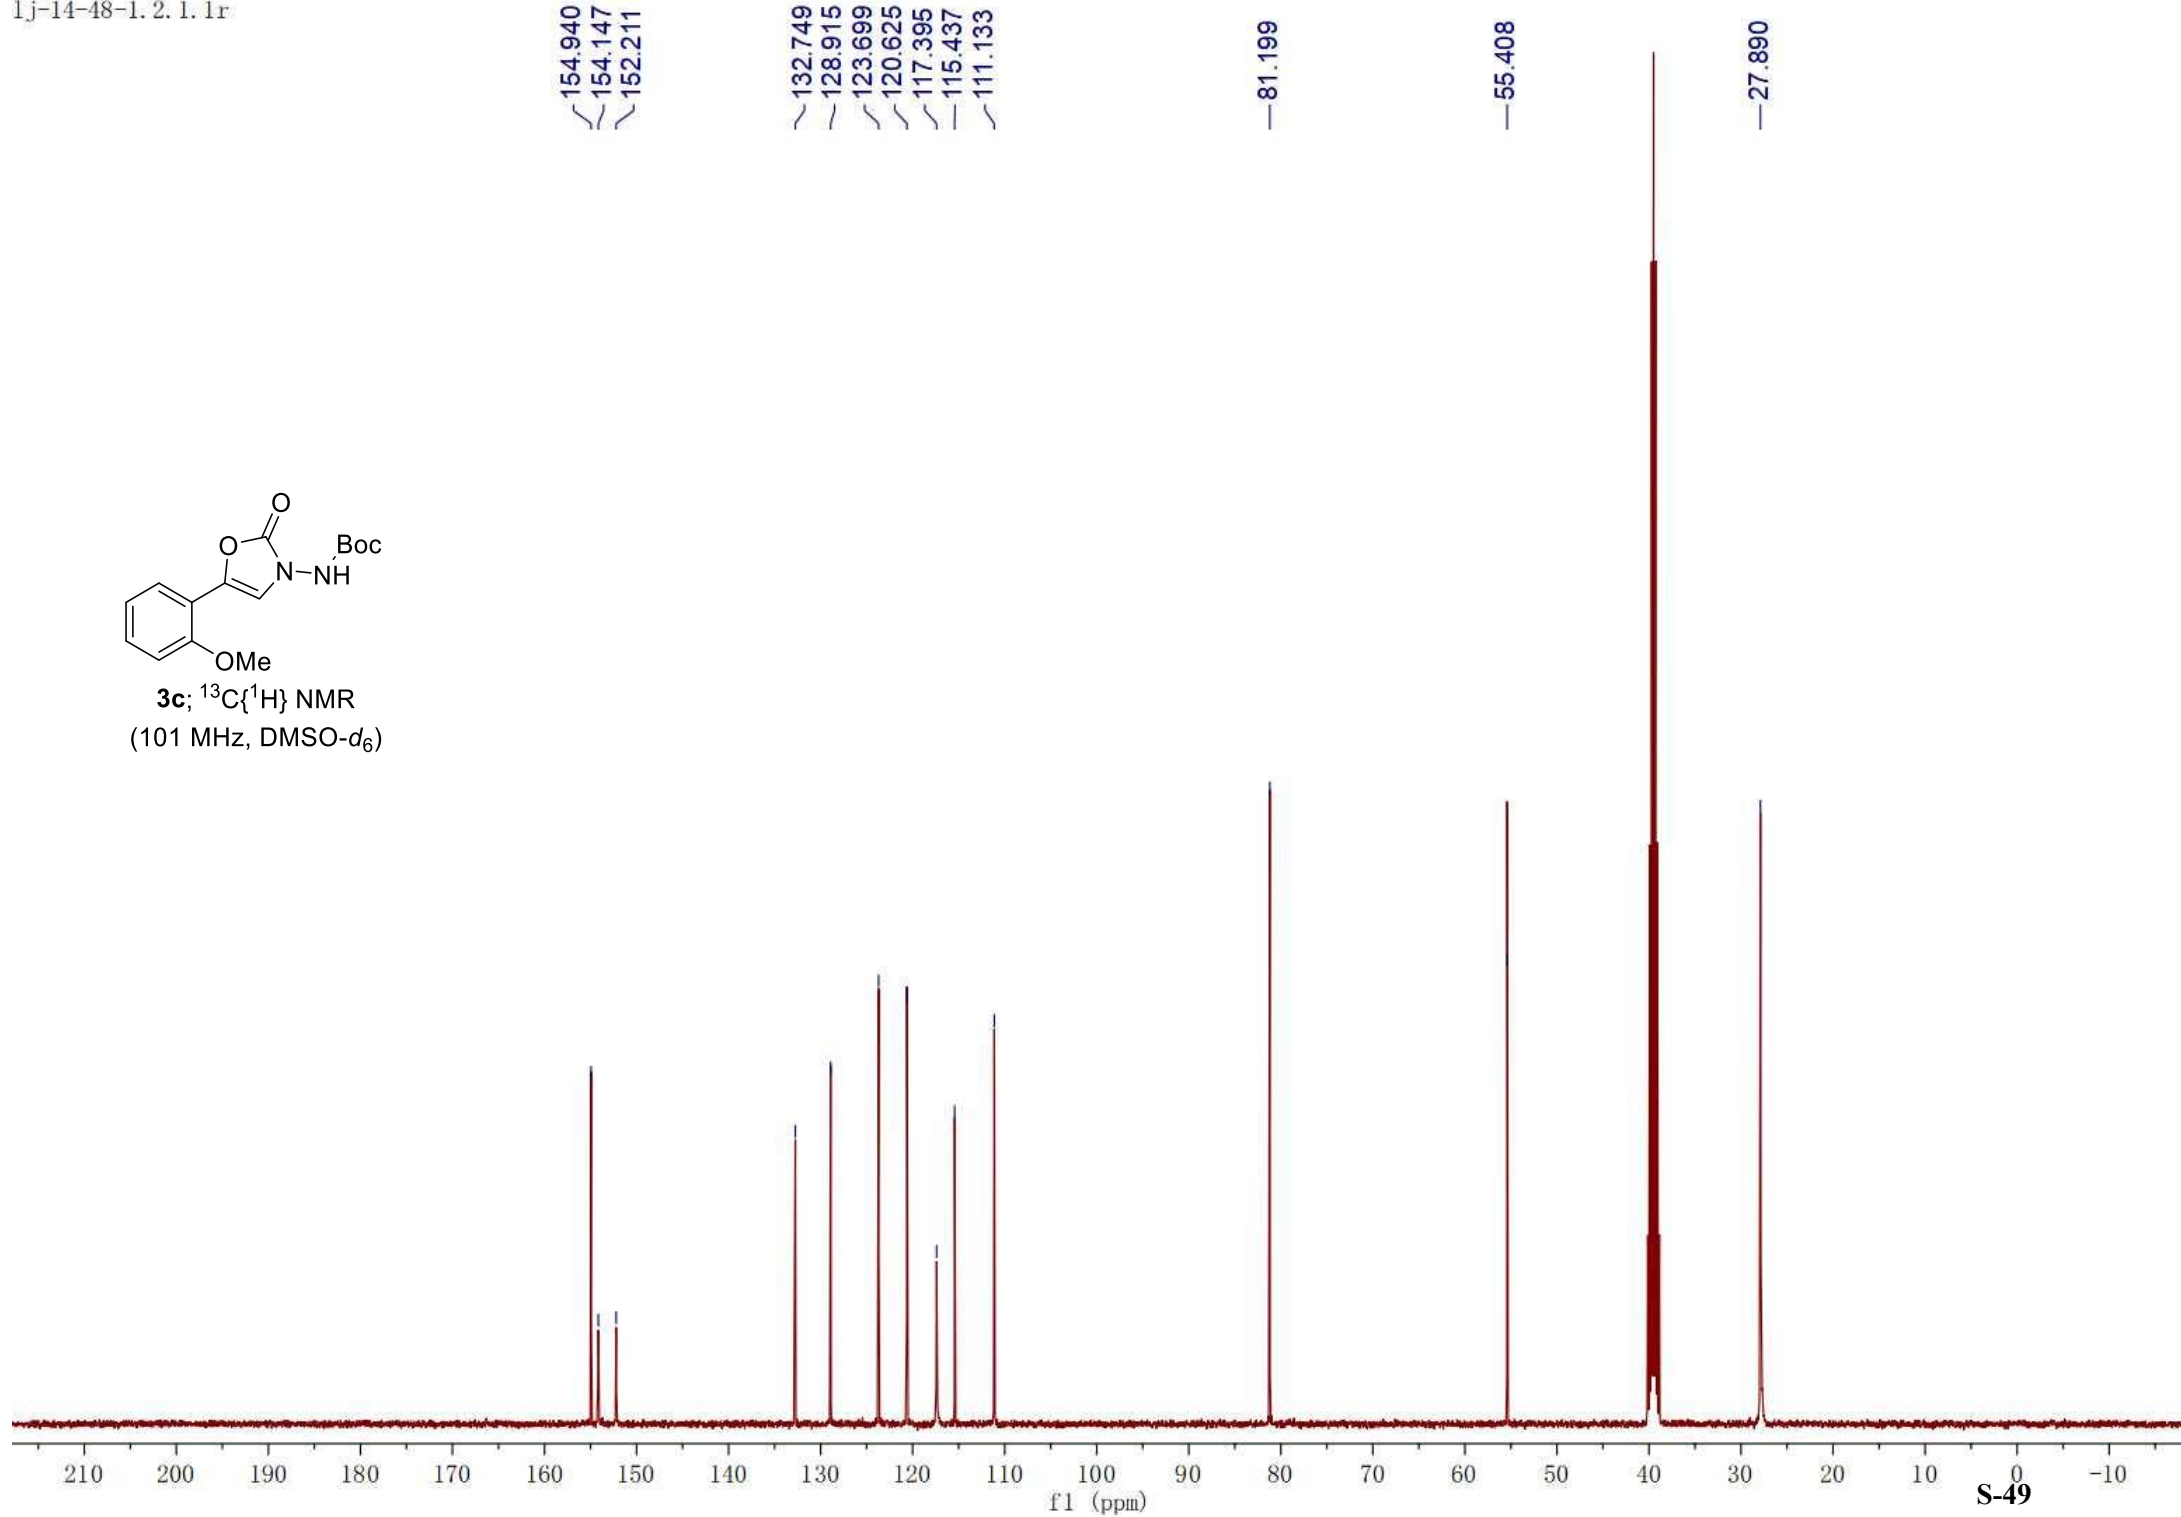

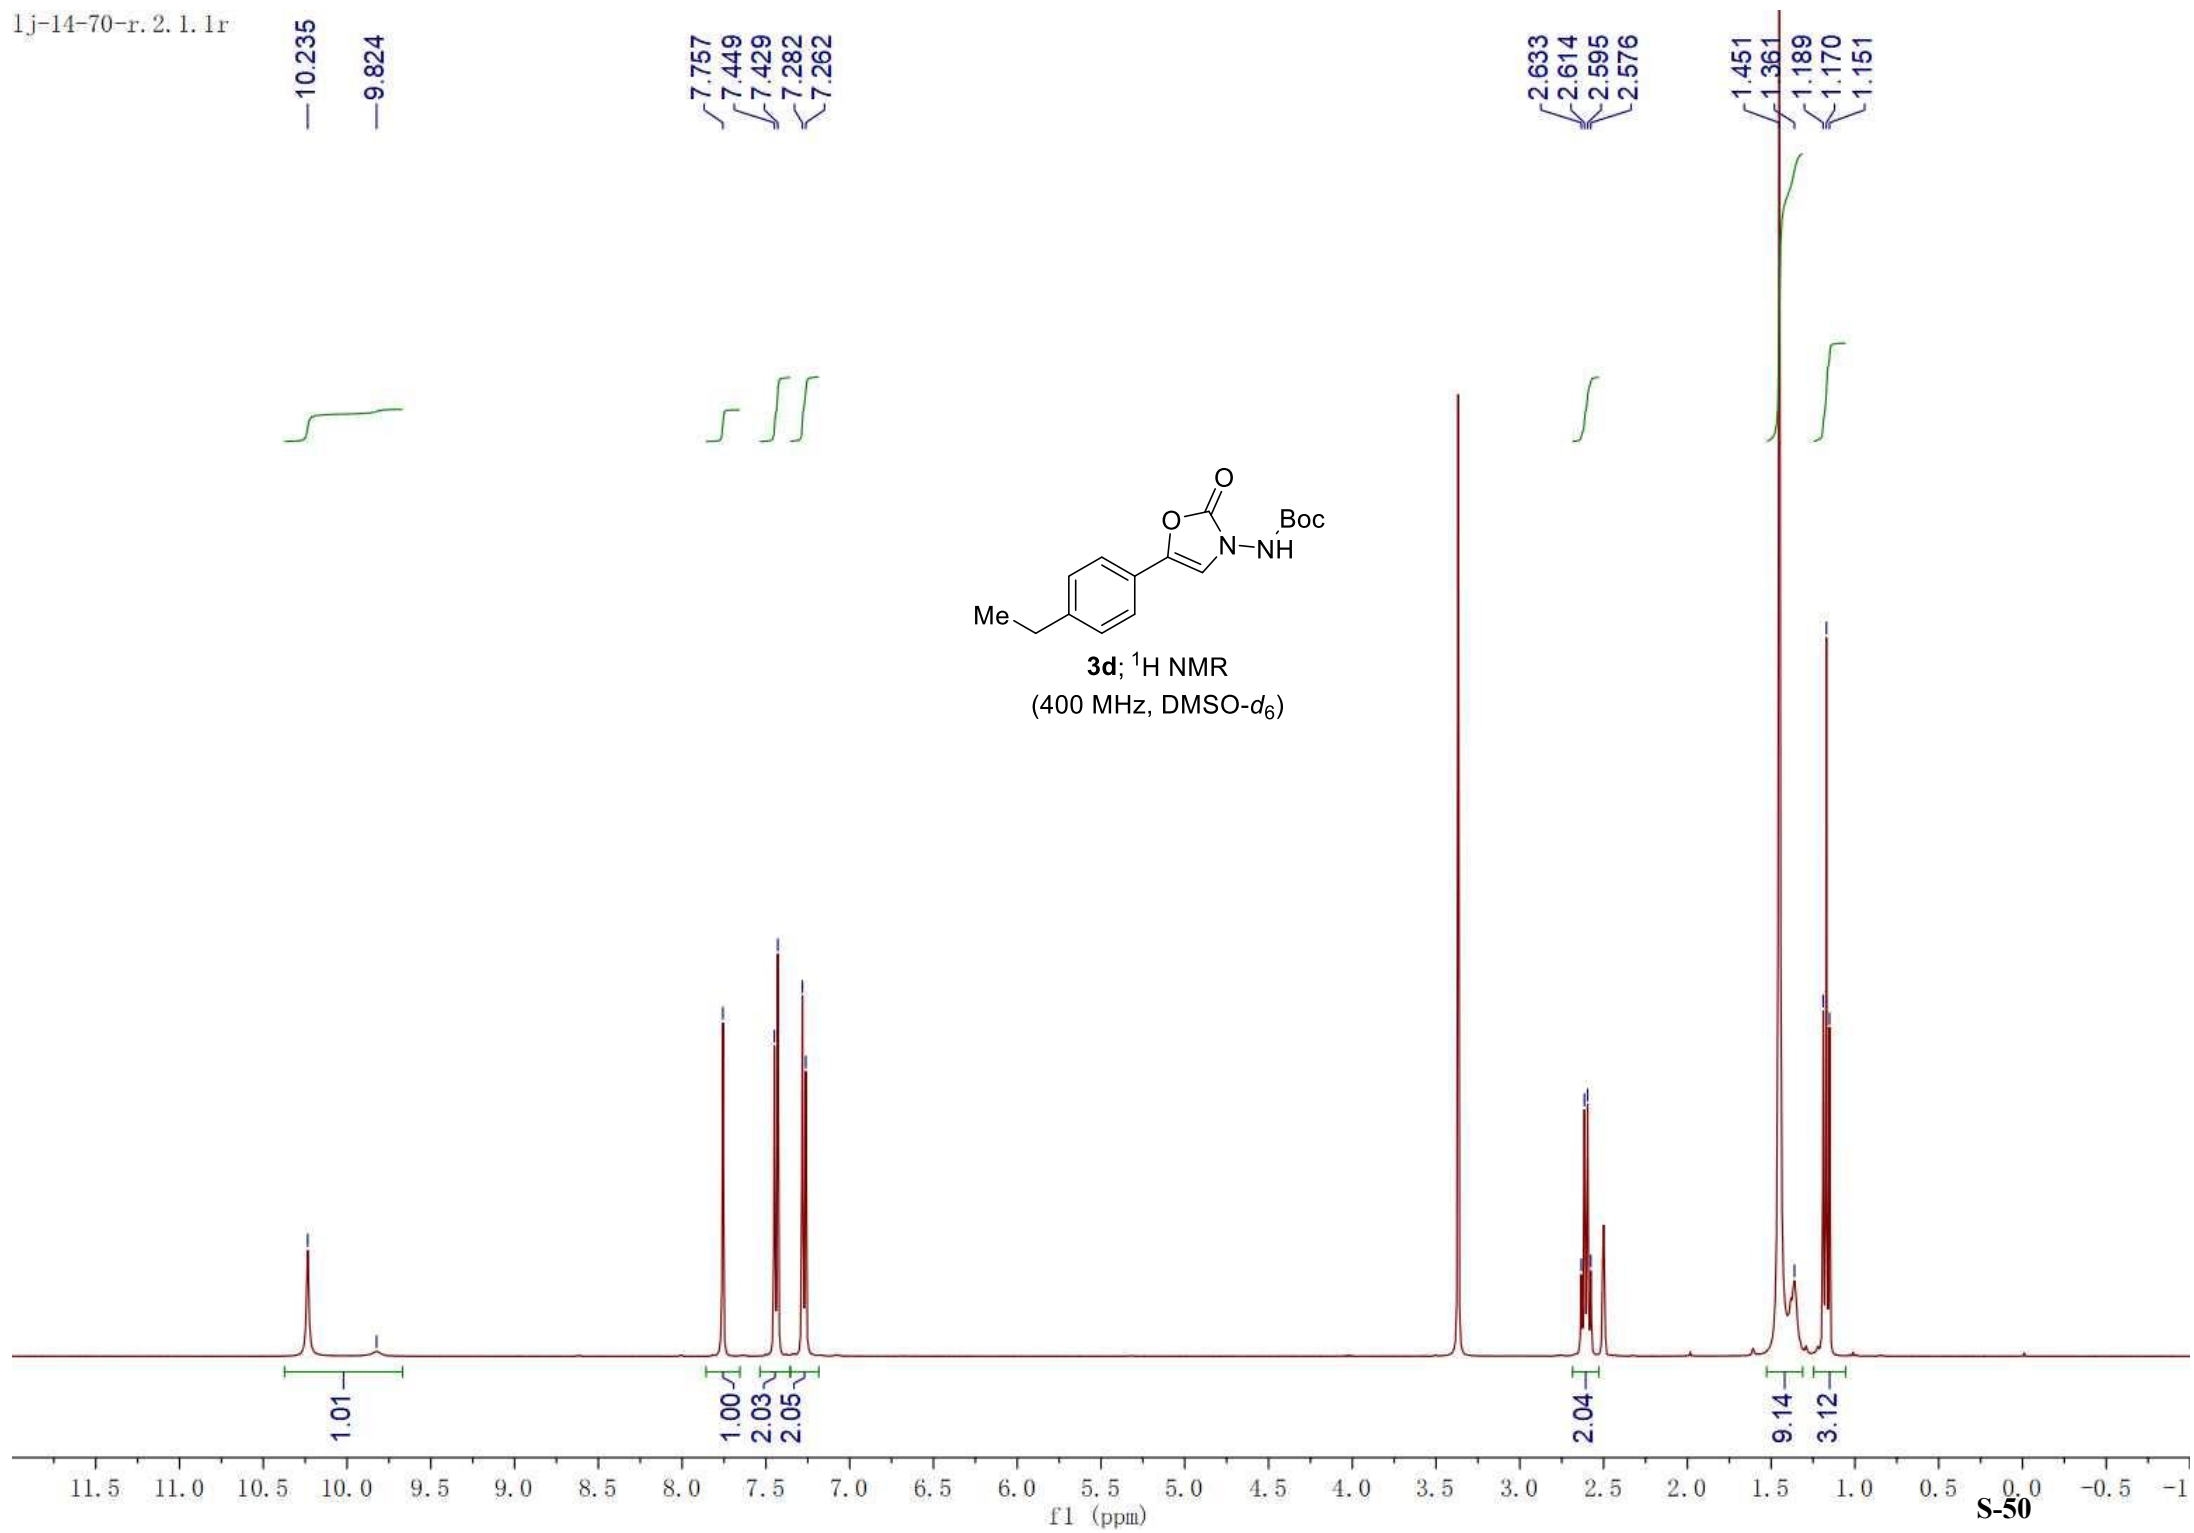

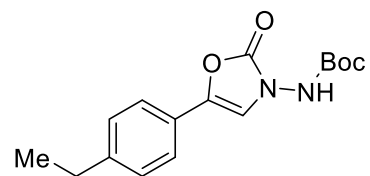

**3d**;  $^{13}\text{C}\{^1\text{H}\}$  NMR  
(101 MHz,  $\text{DMSO}-d_6$ )

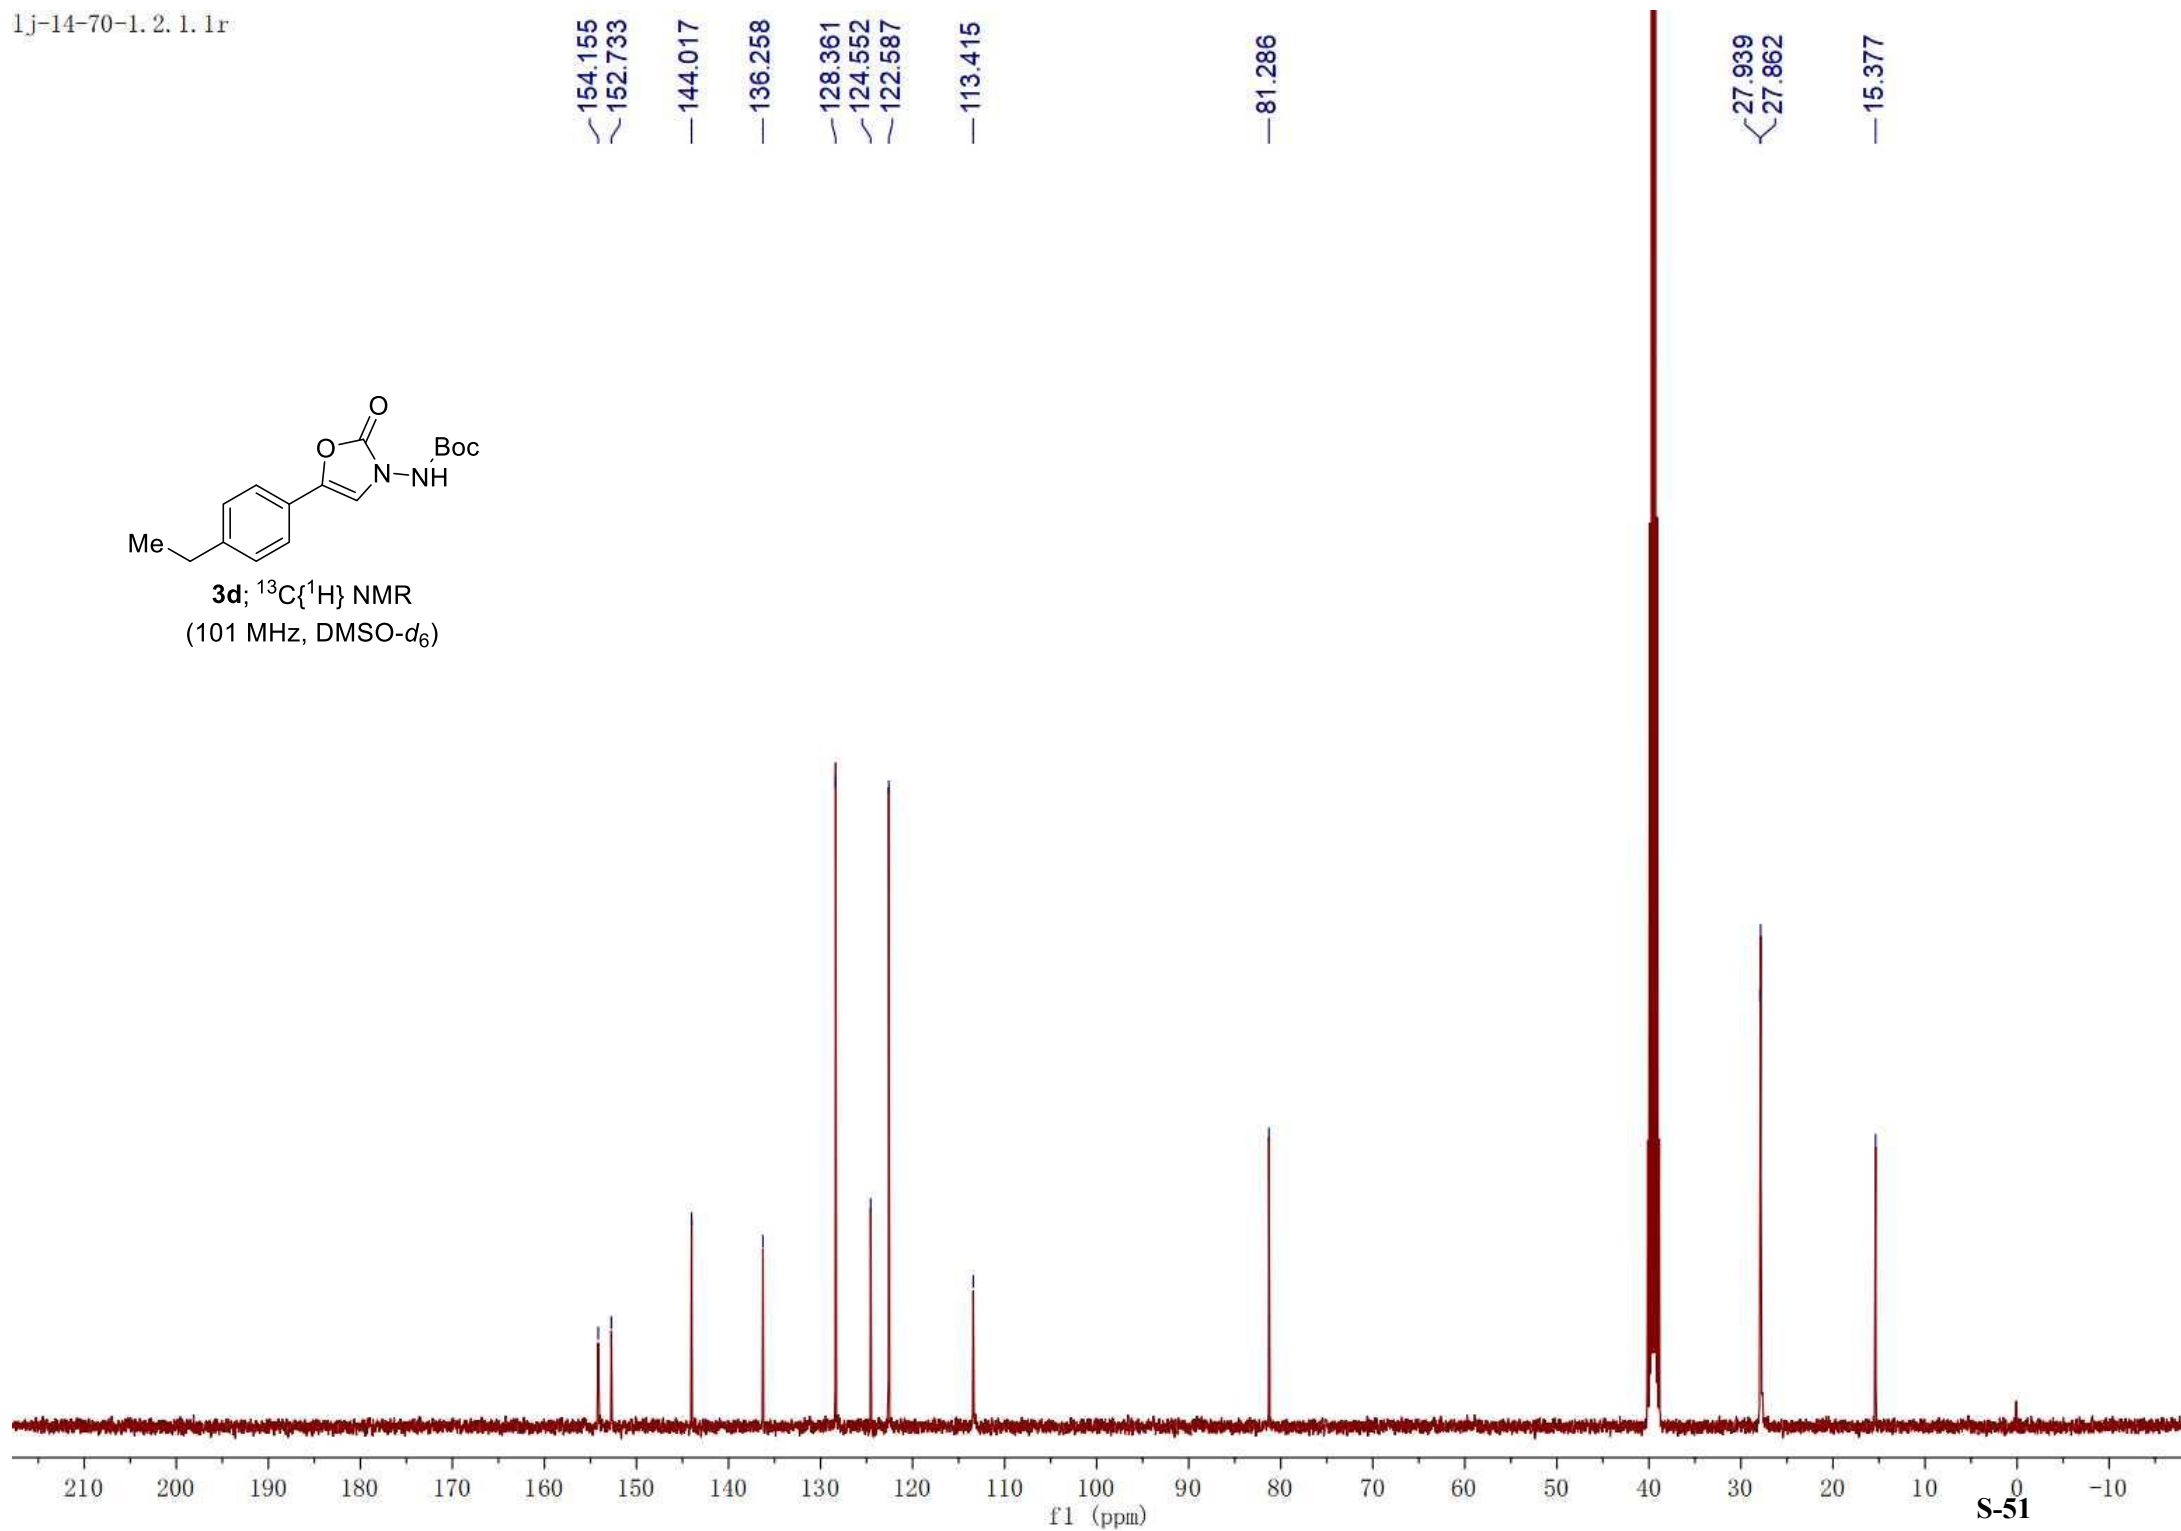

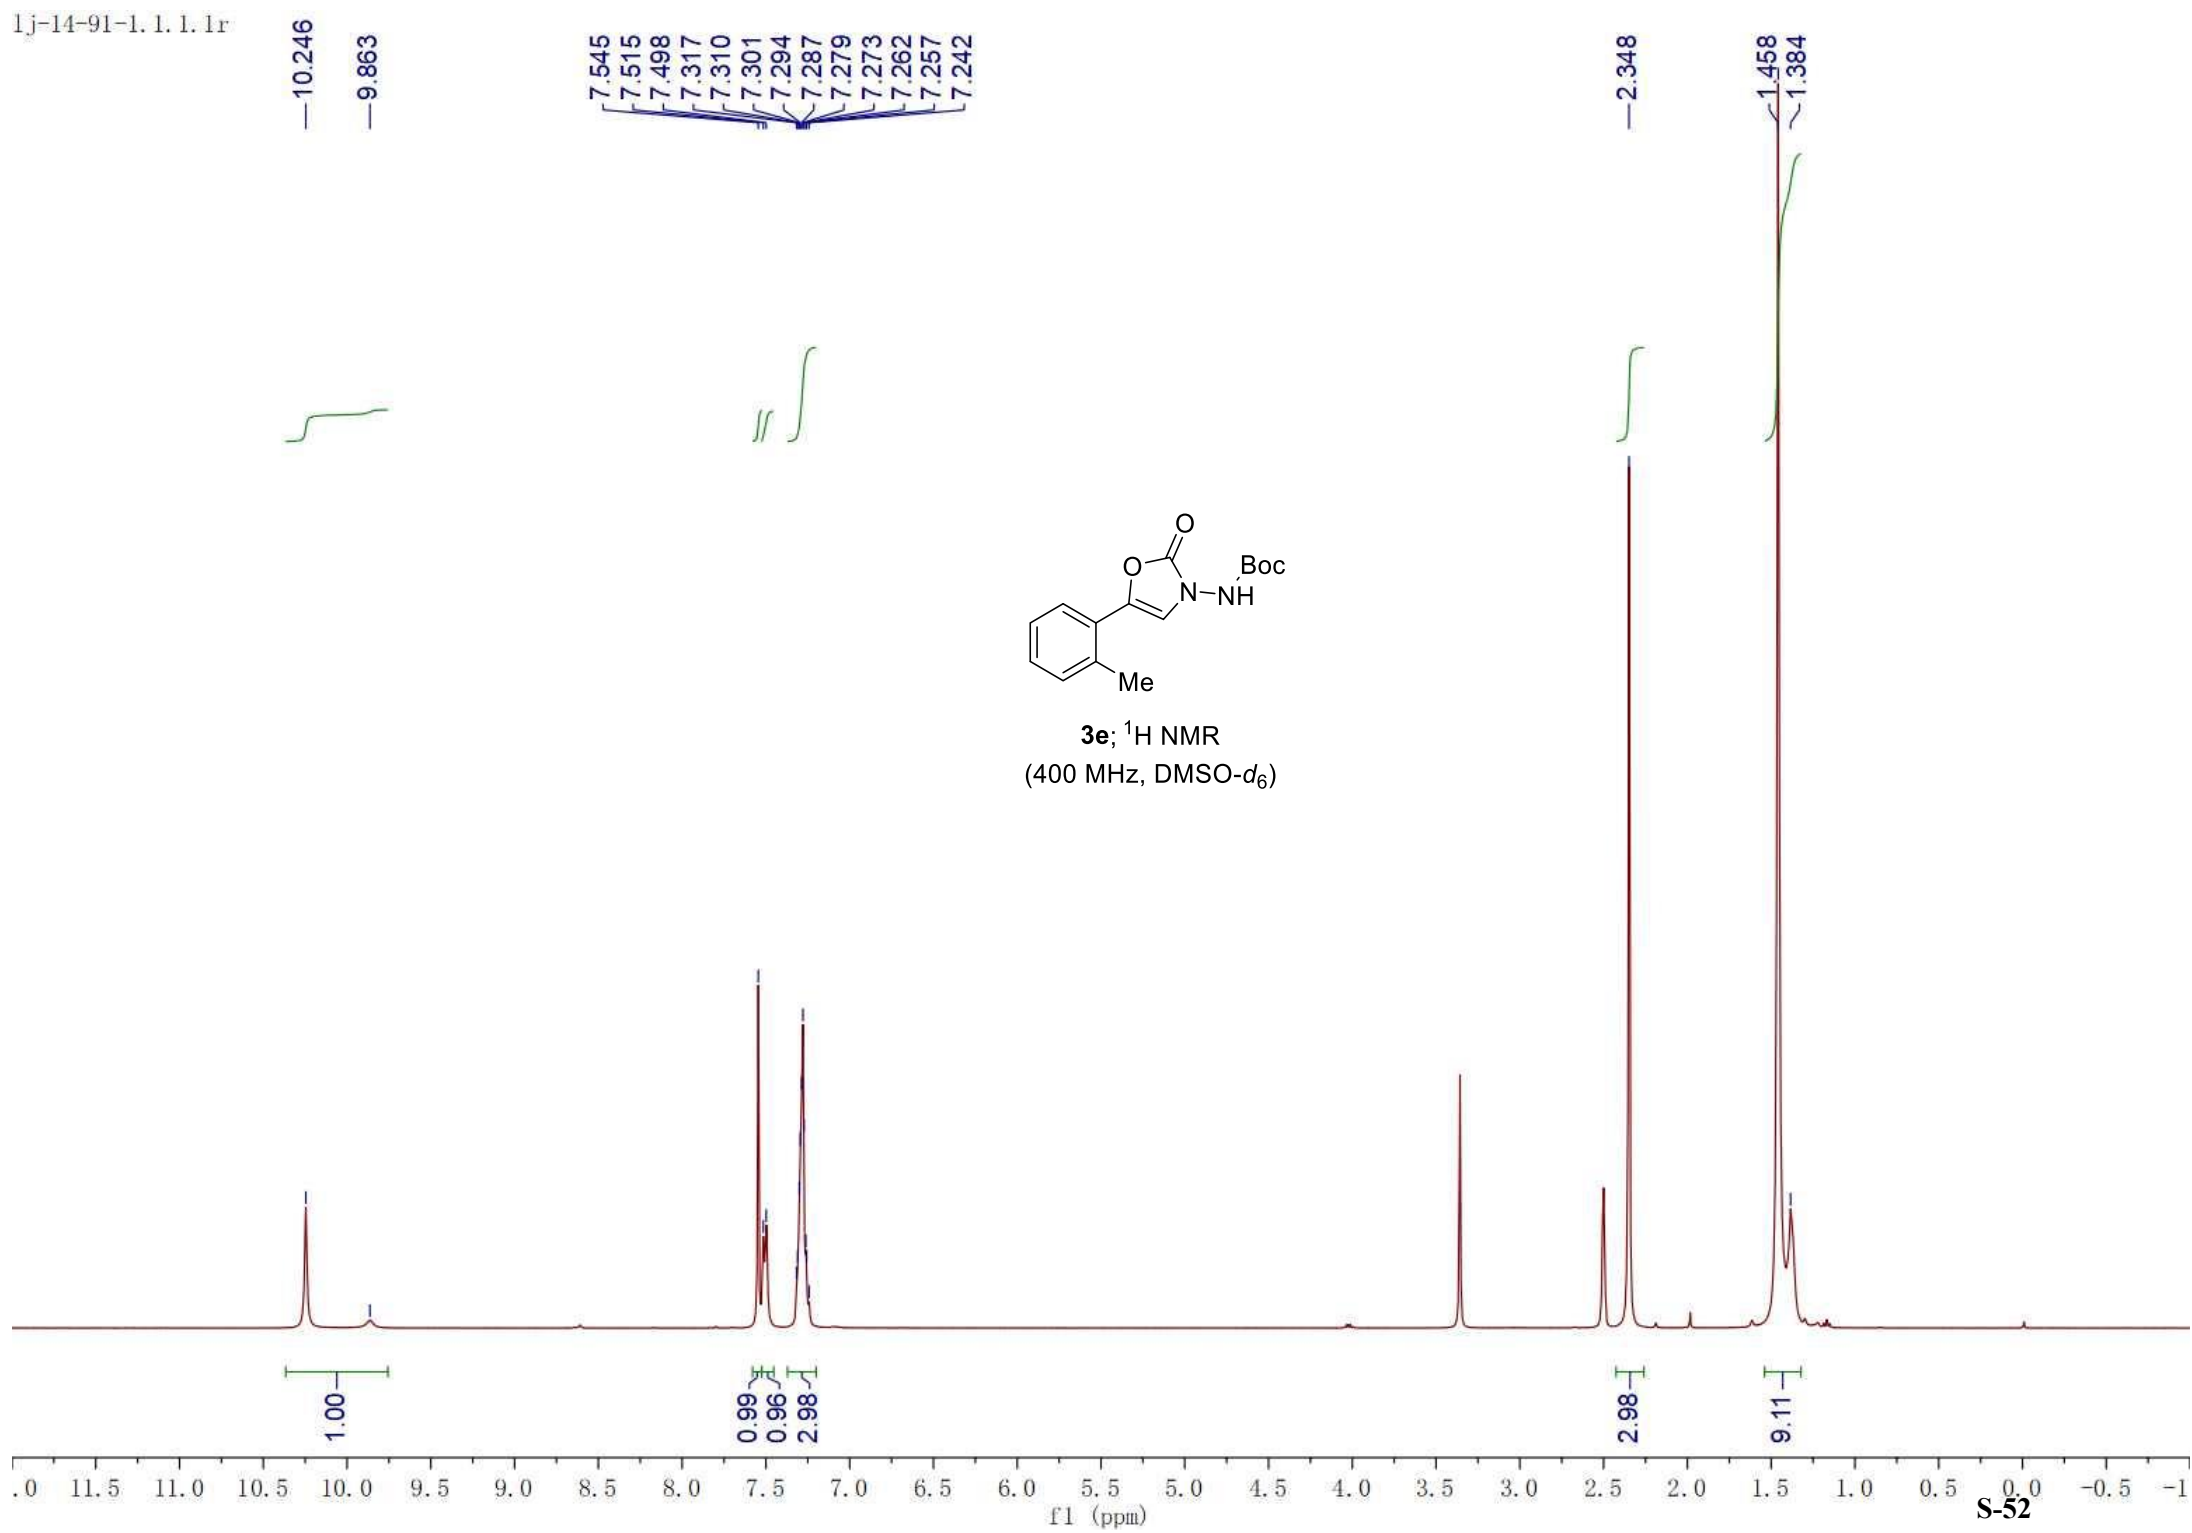



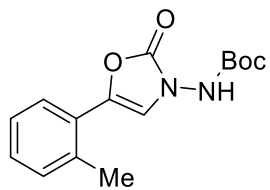

**3e**;  $^{13}\text{C}\{^1\text{H}\}$  NMR  
(101 MHz,  $\text{DMSO}-d_6$ )

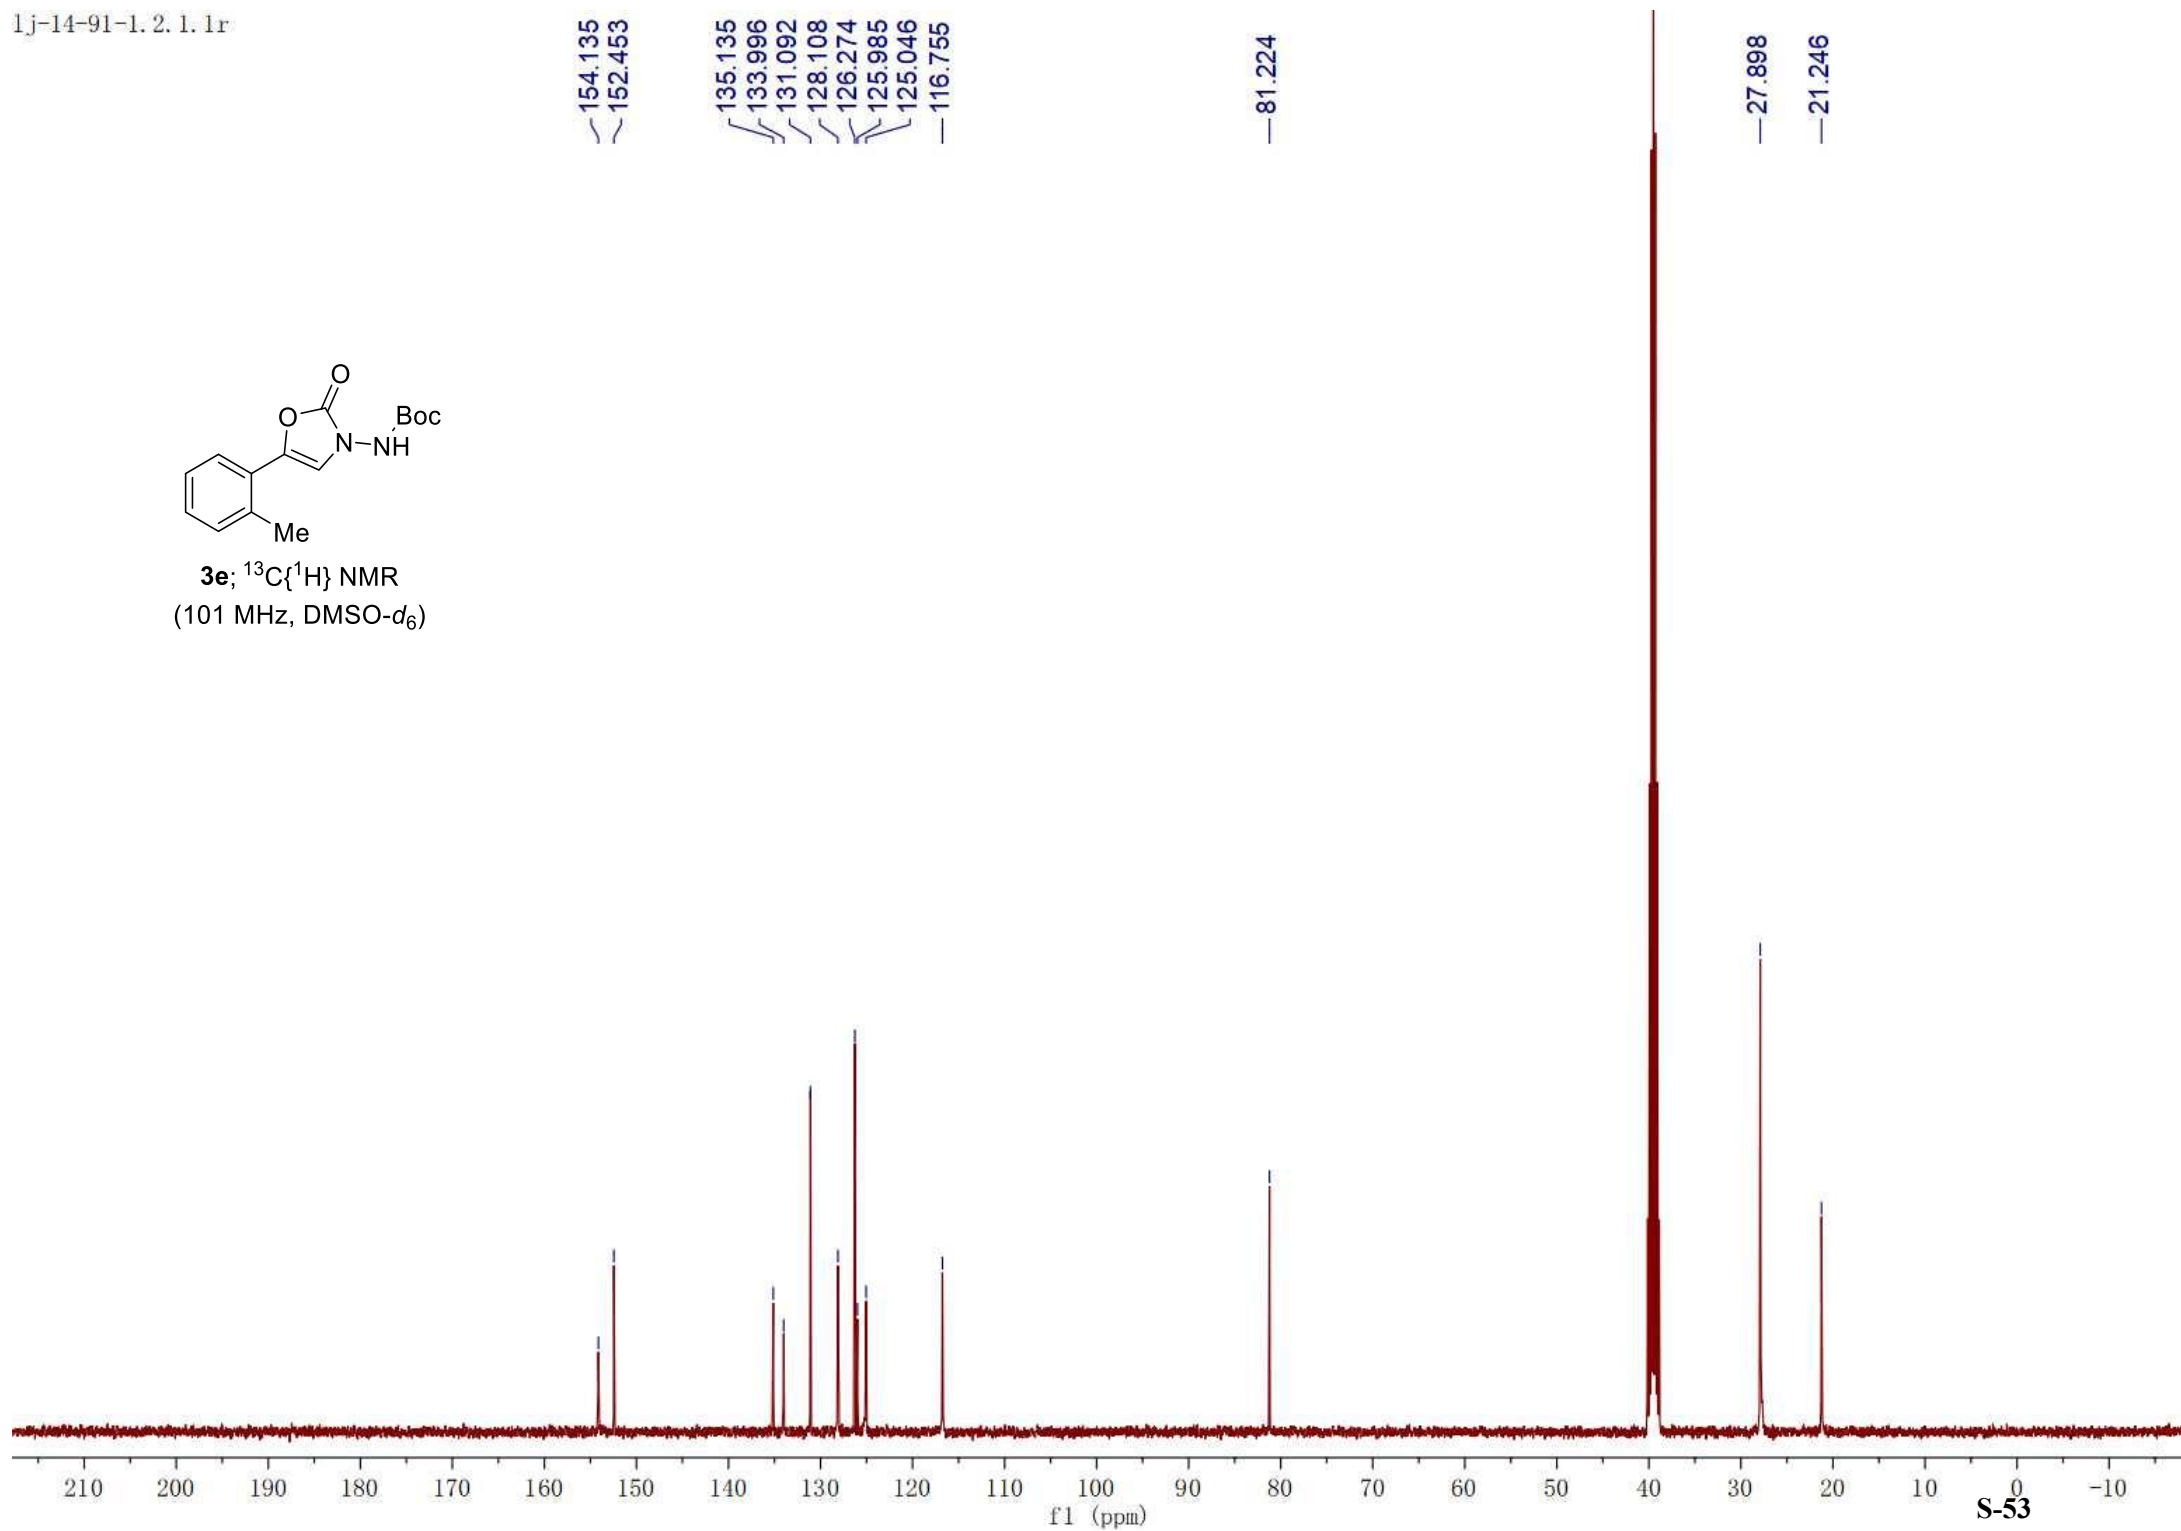

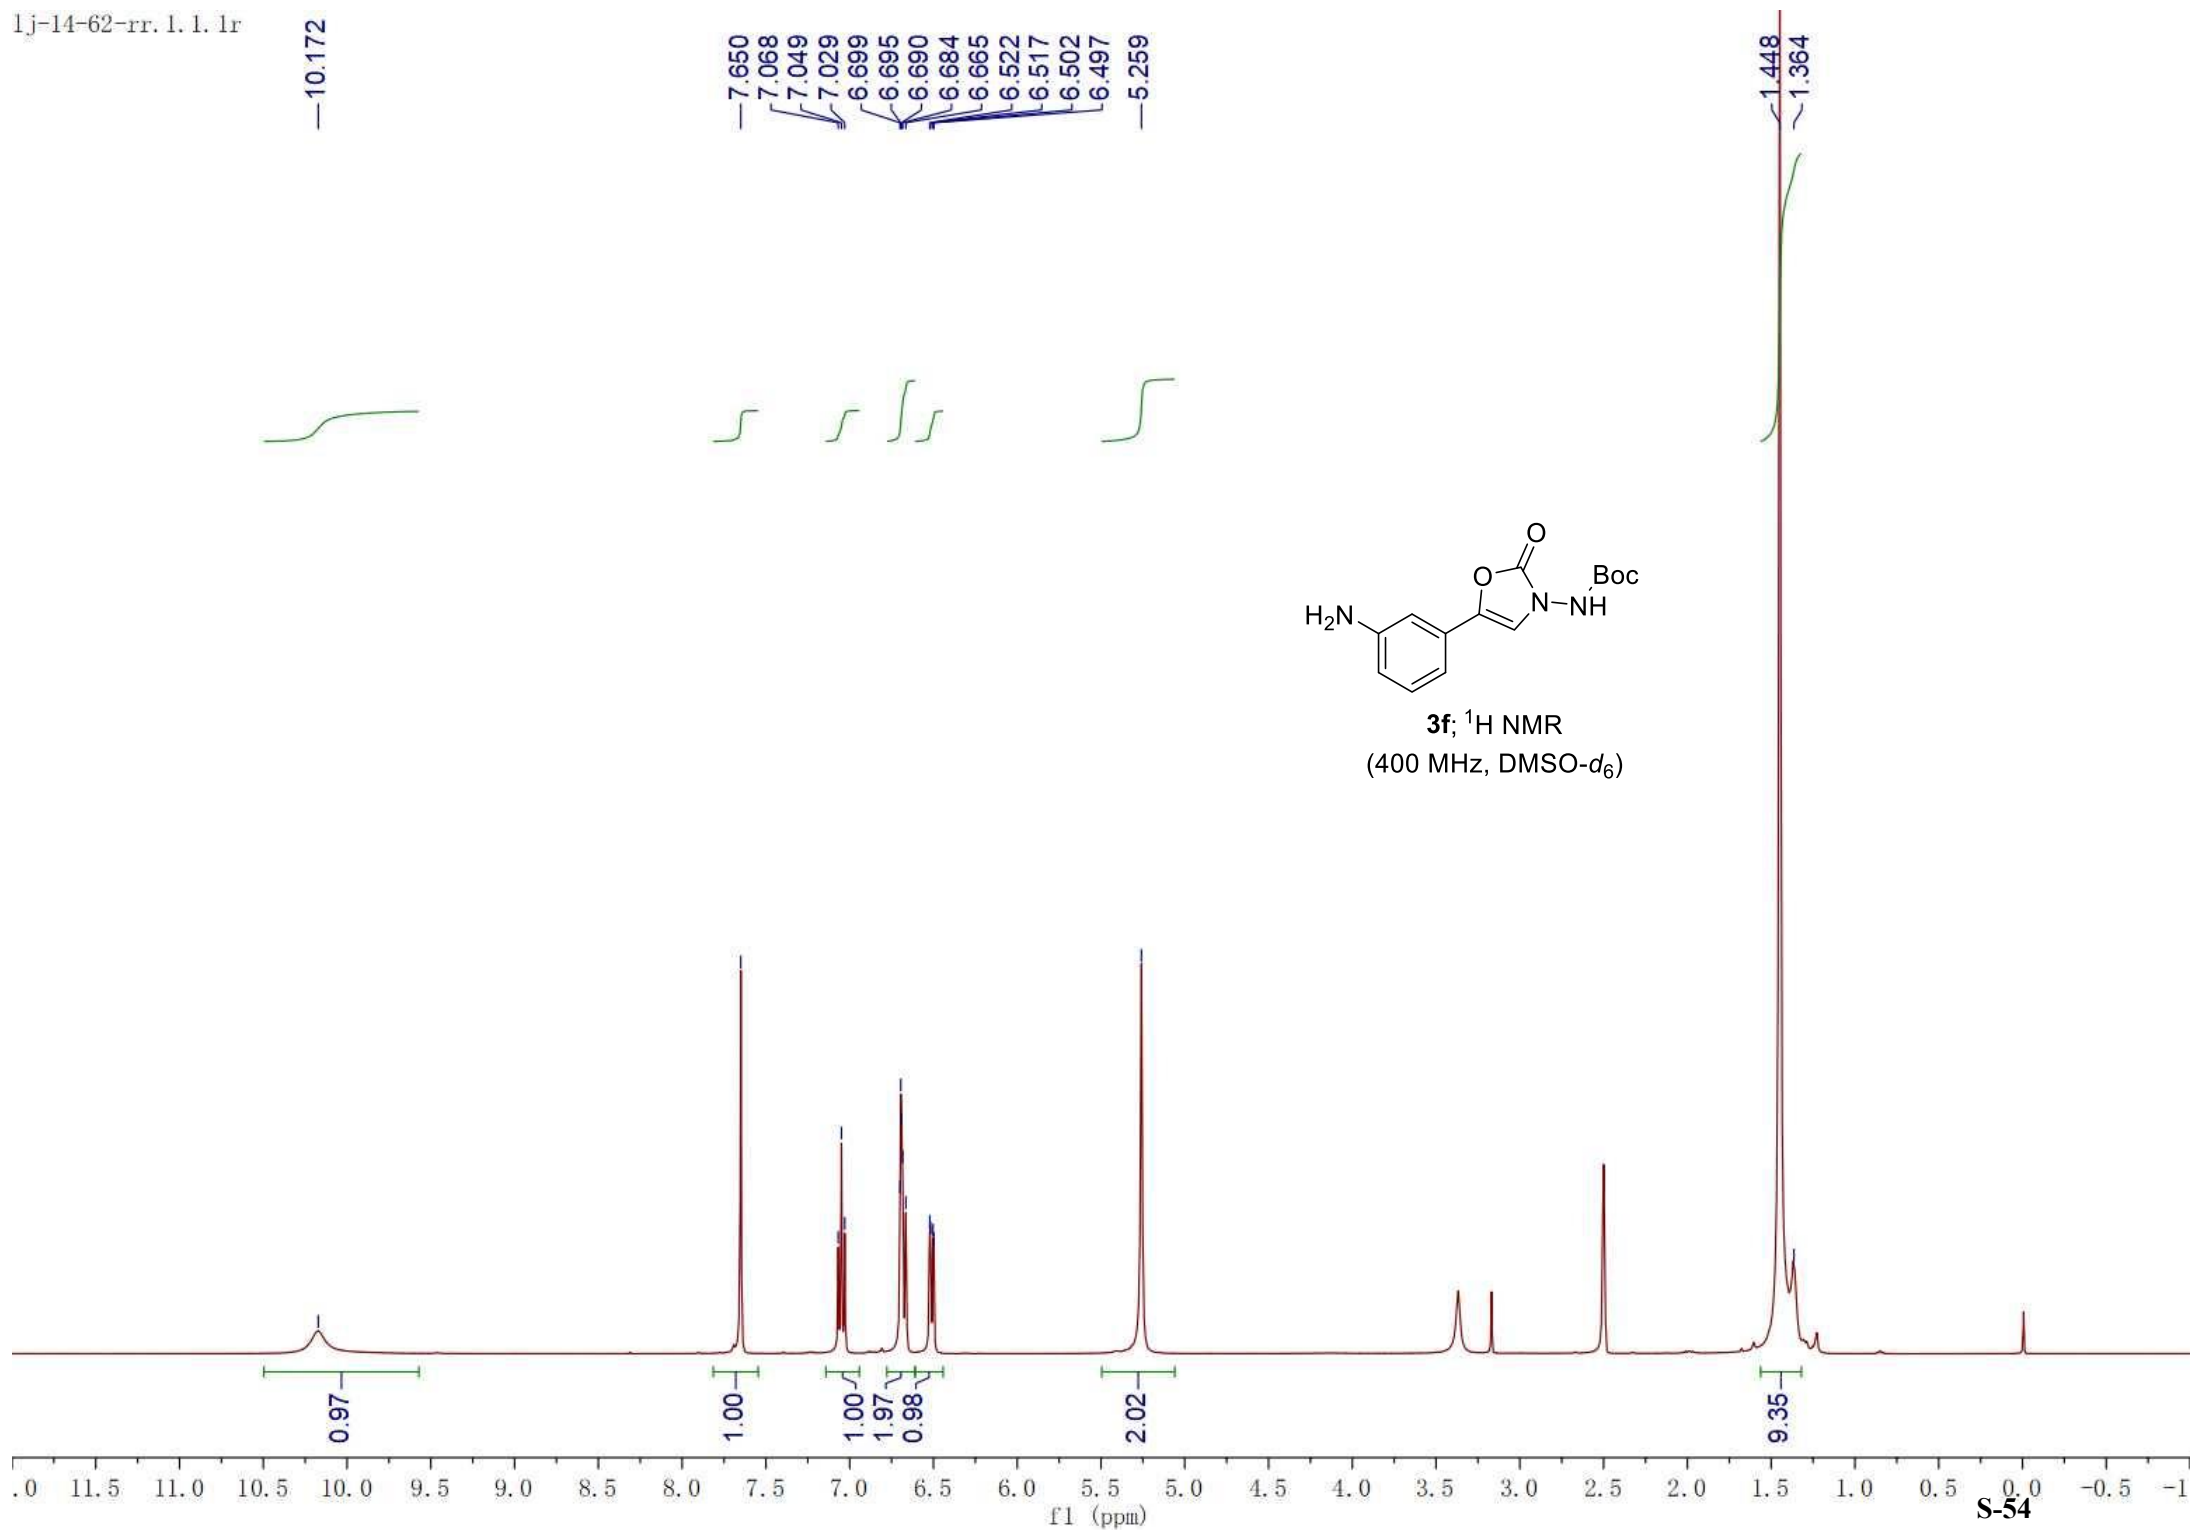

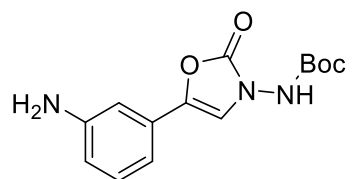

**3f**,  $^{13}\text{C}\{^1\text{H}\}$  NMR  
(101 MHz,  $\text{DMSO-}d_6$ )

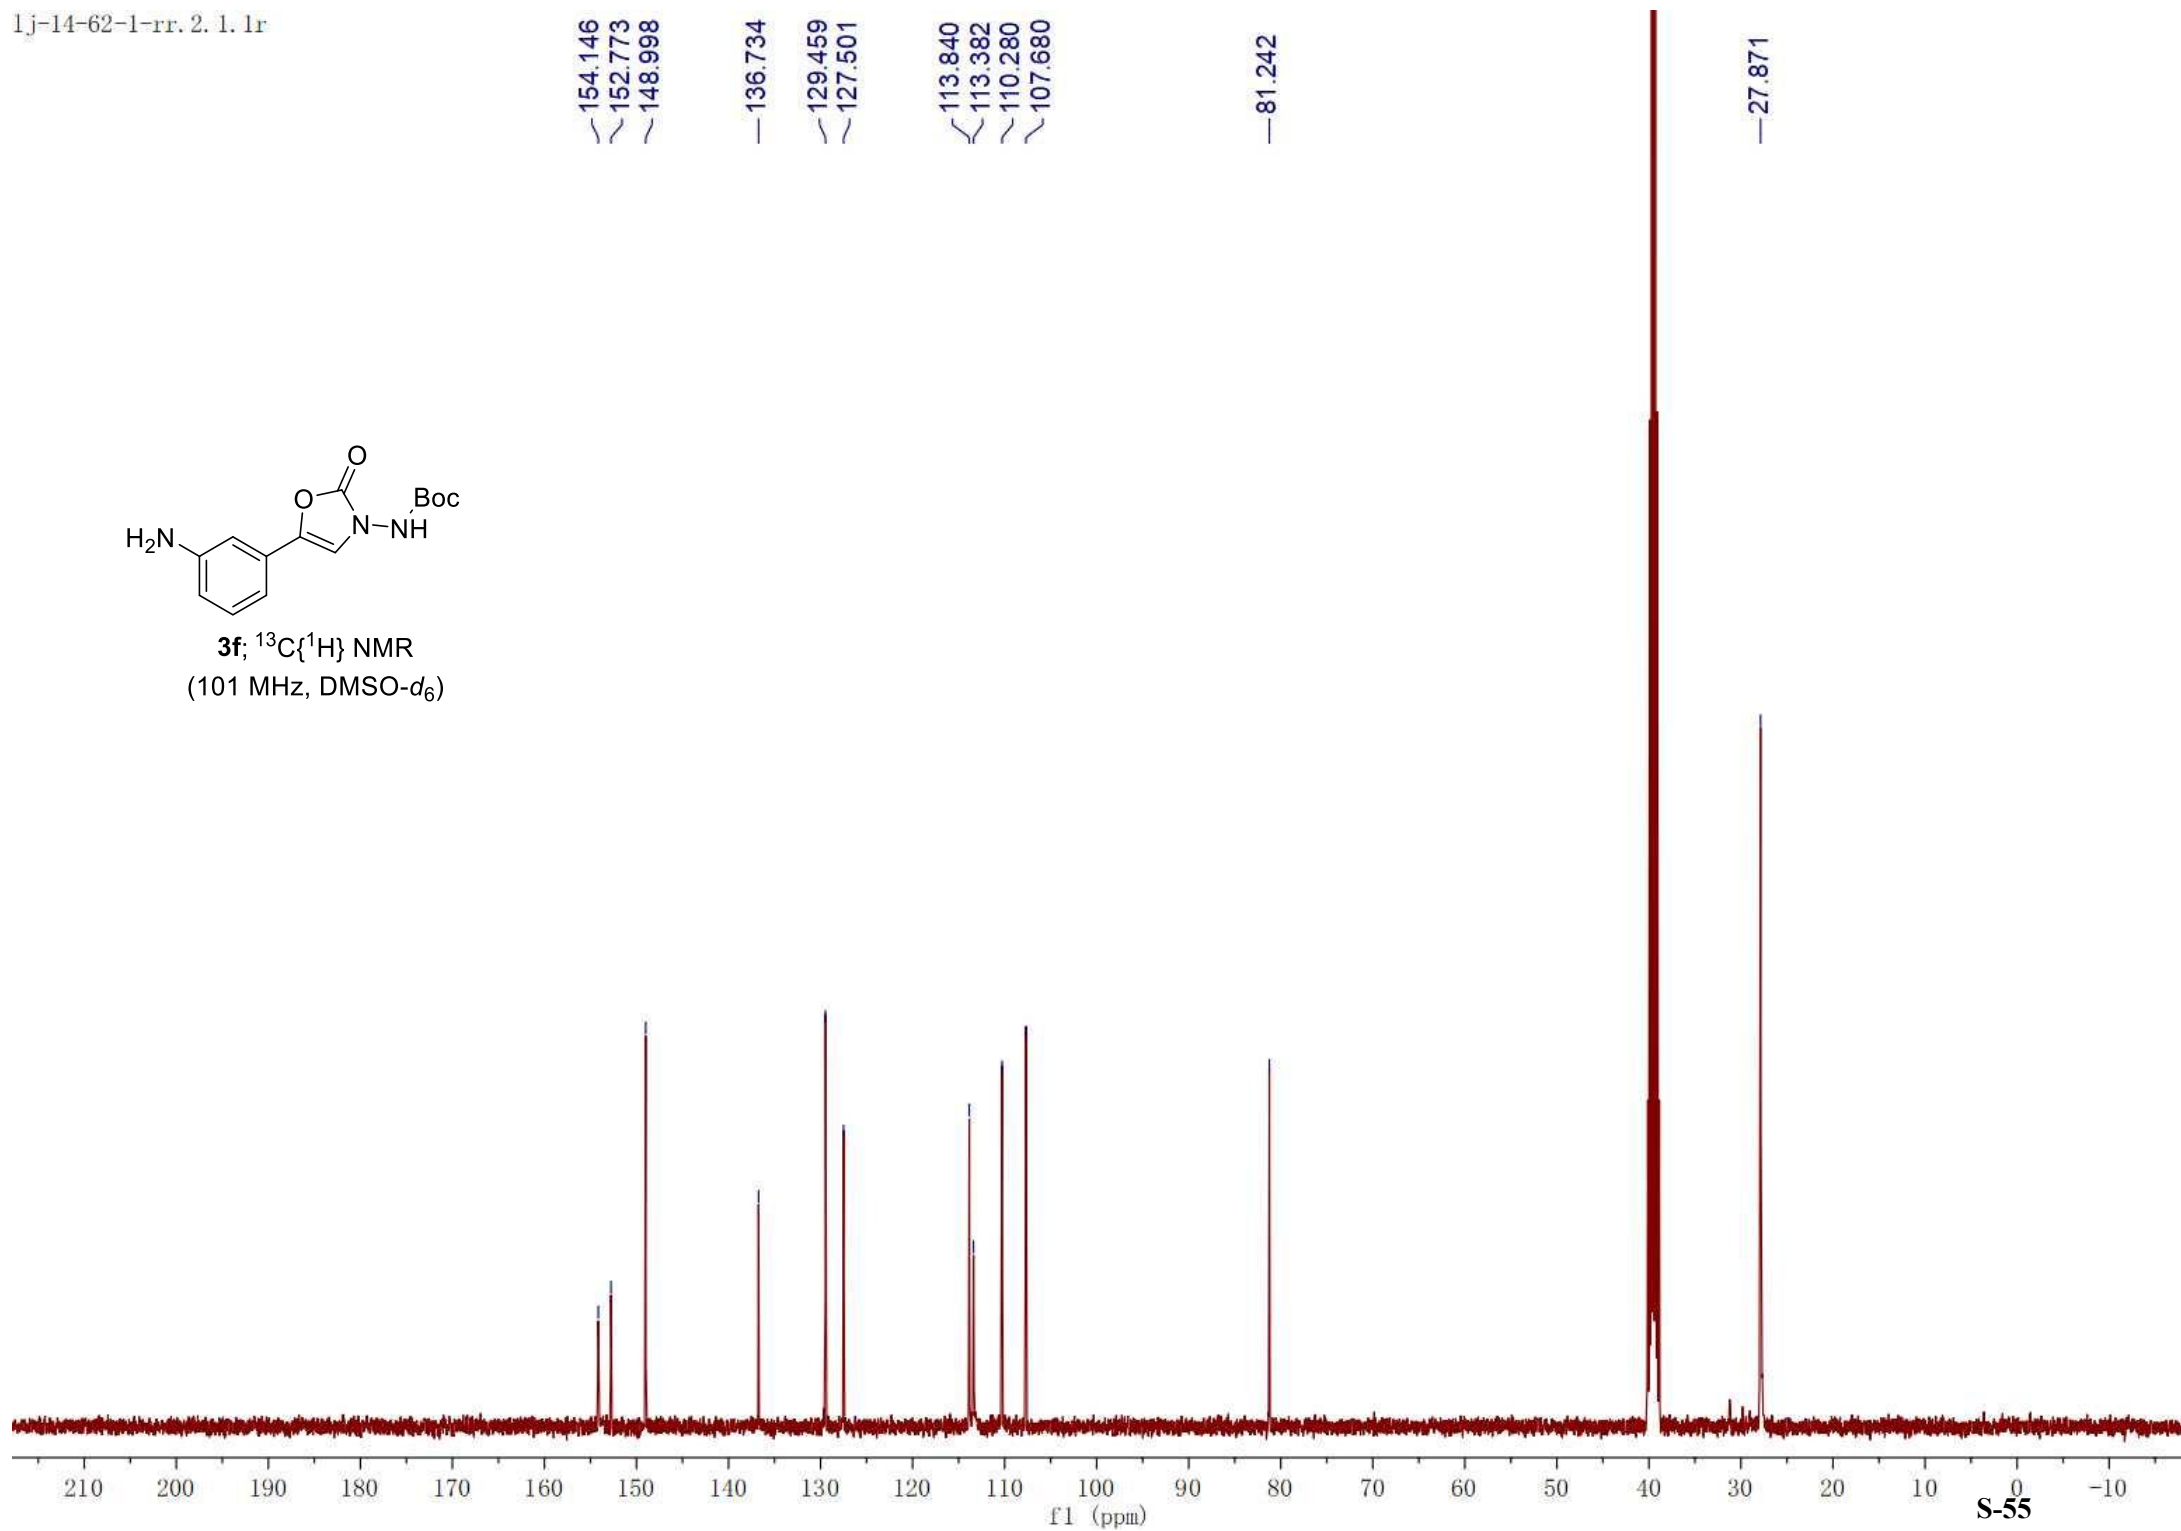

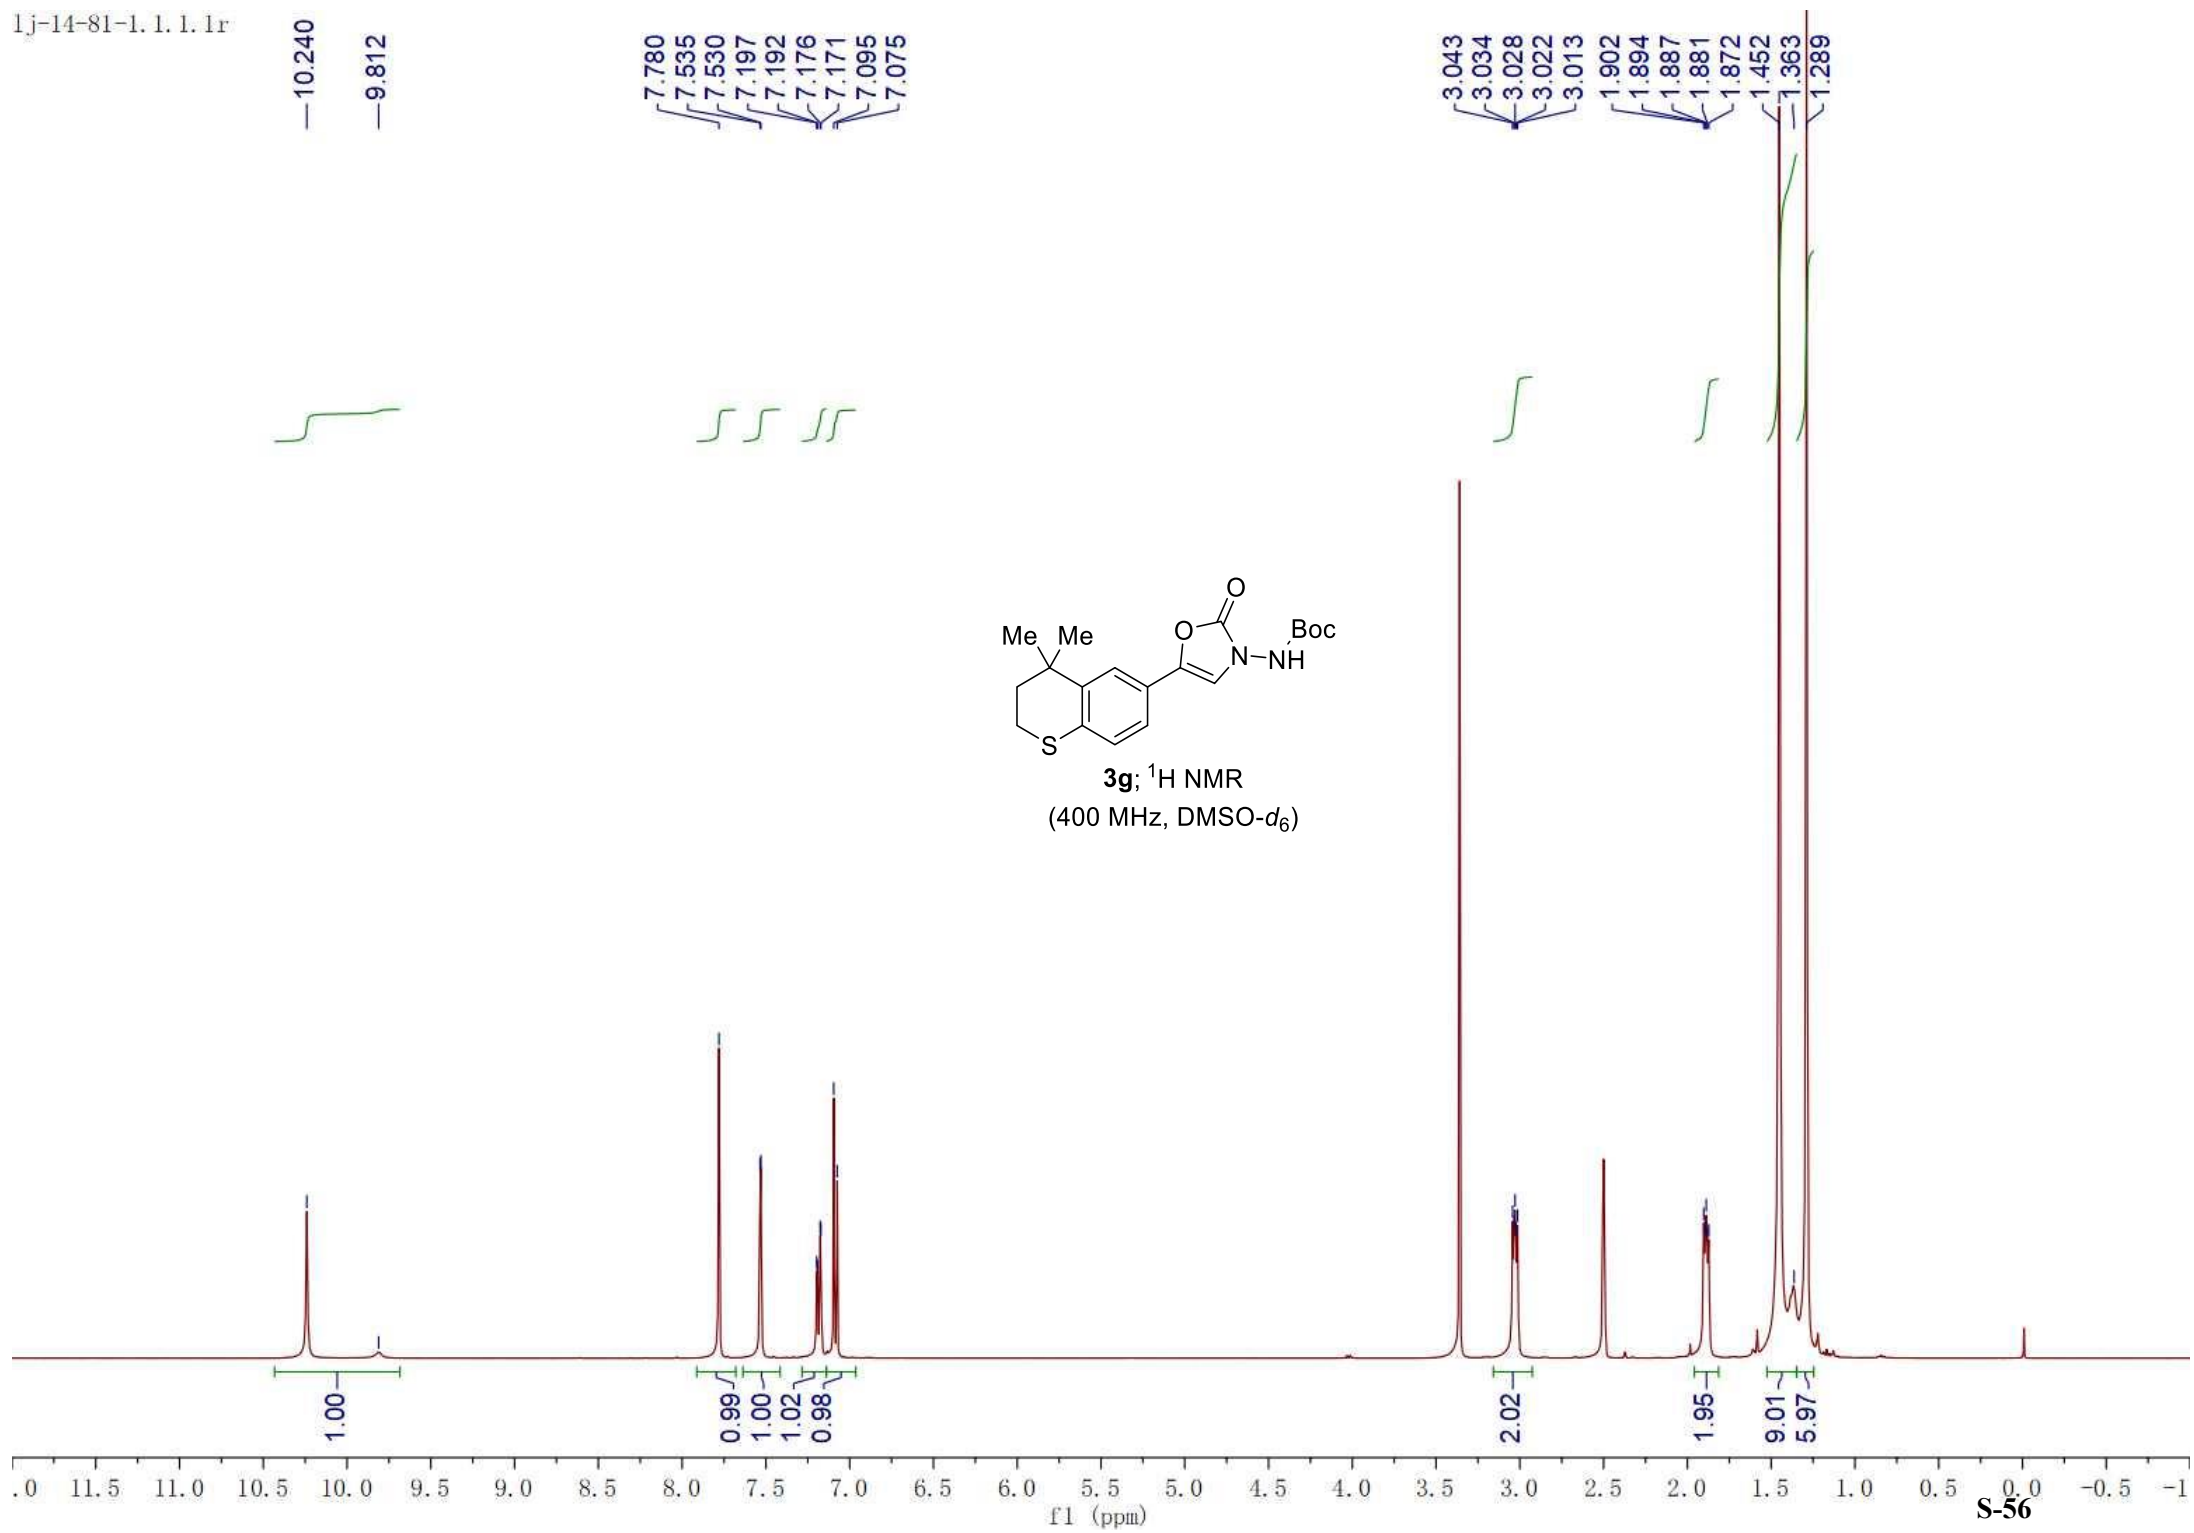

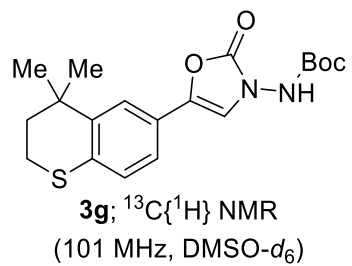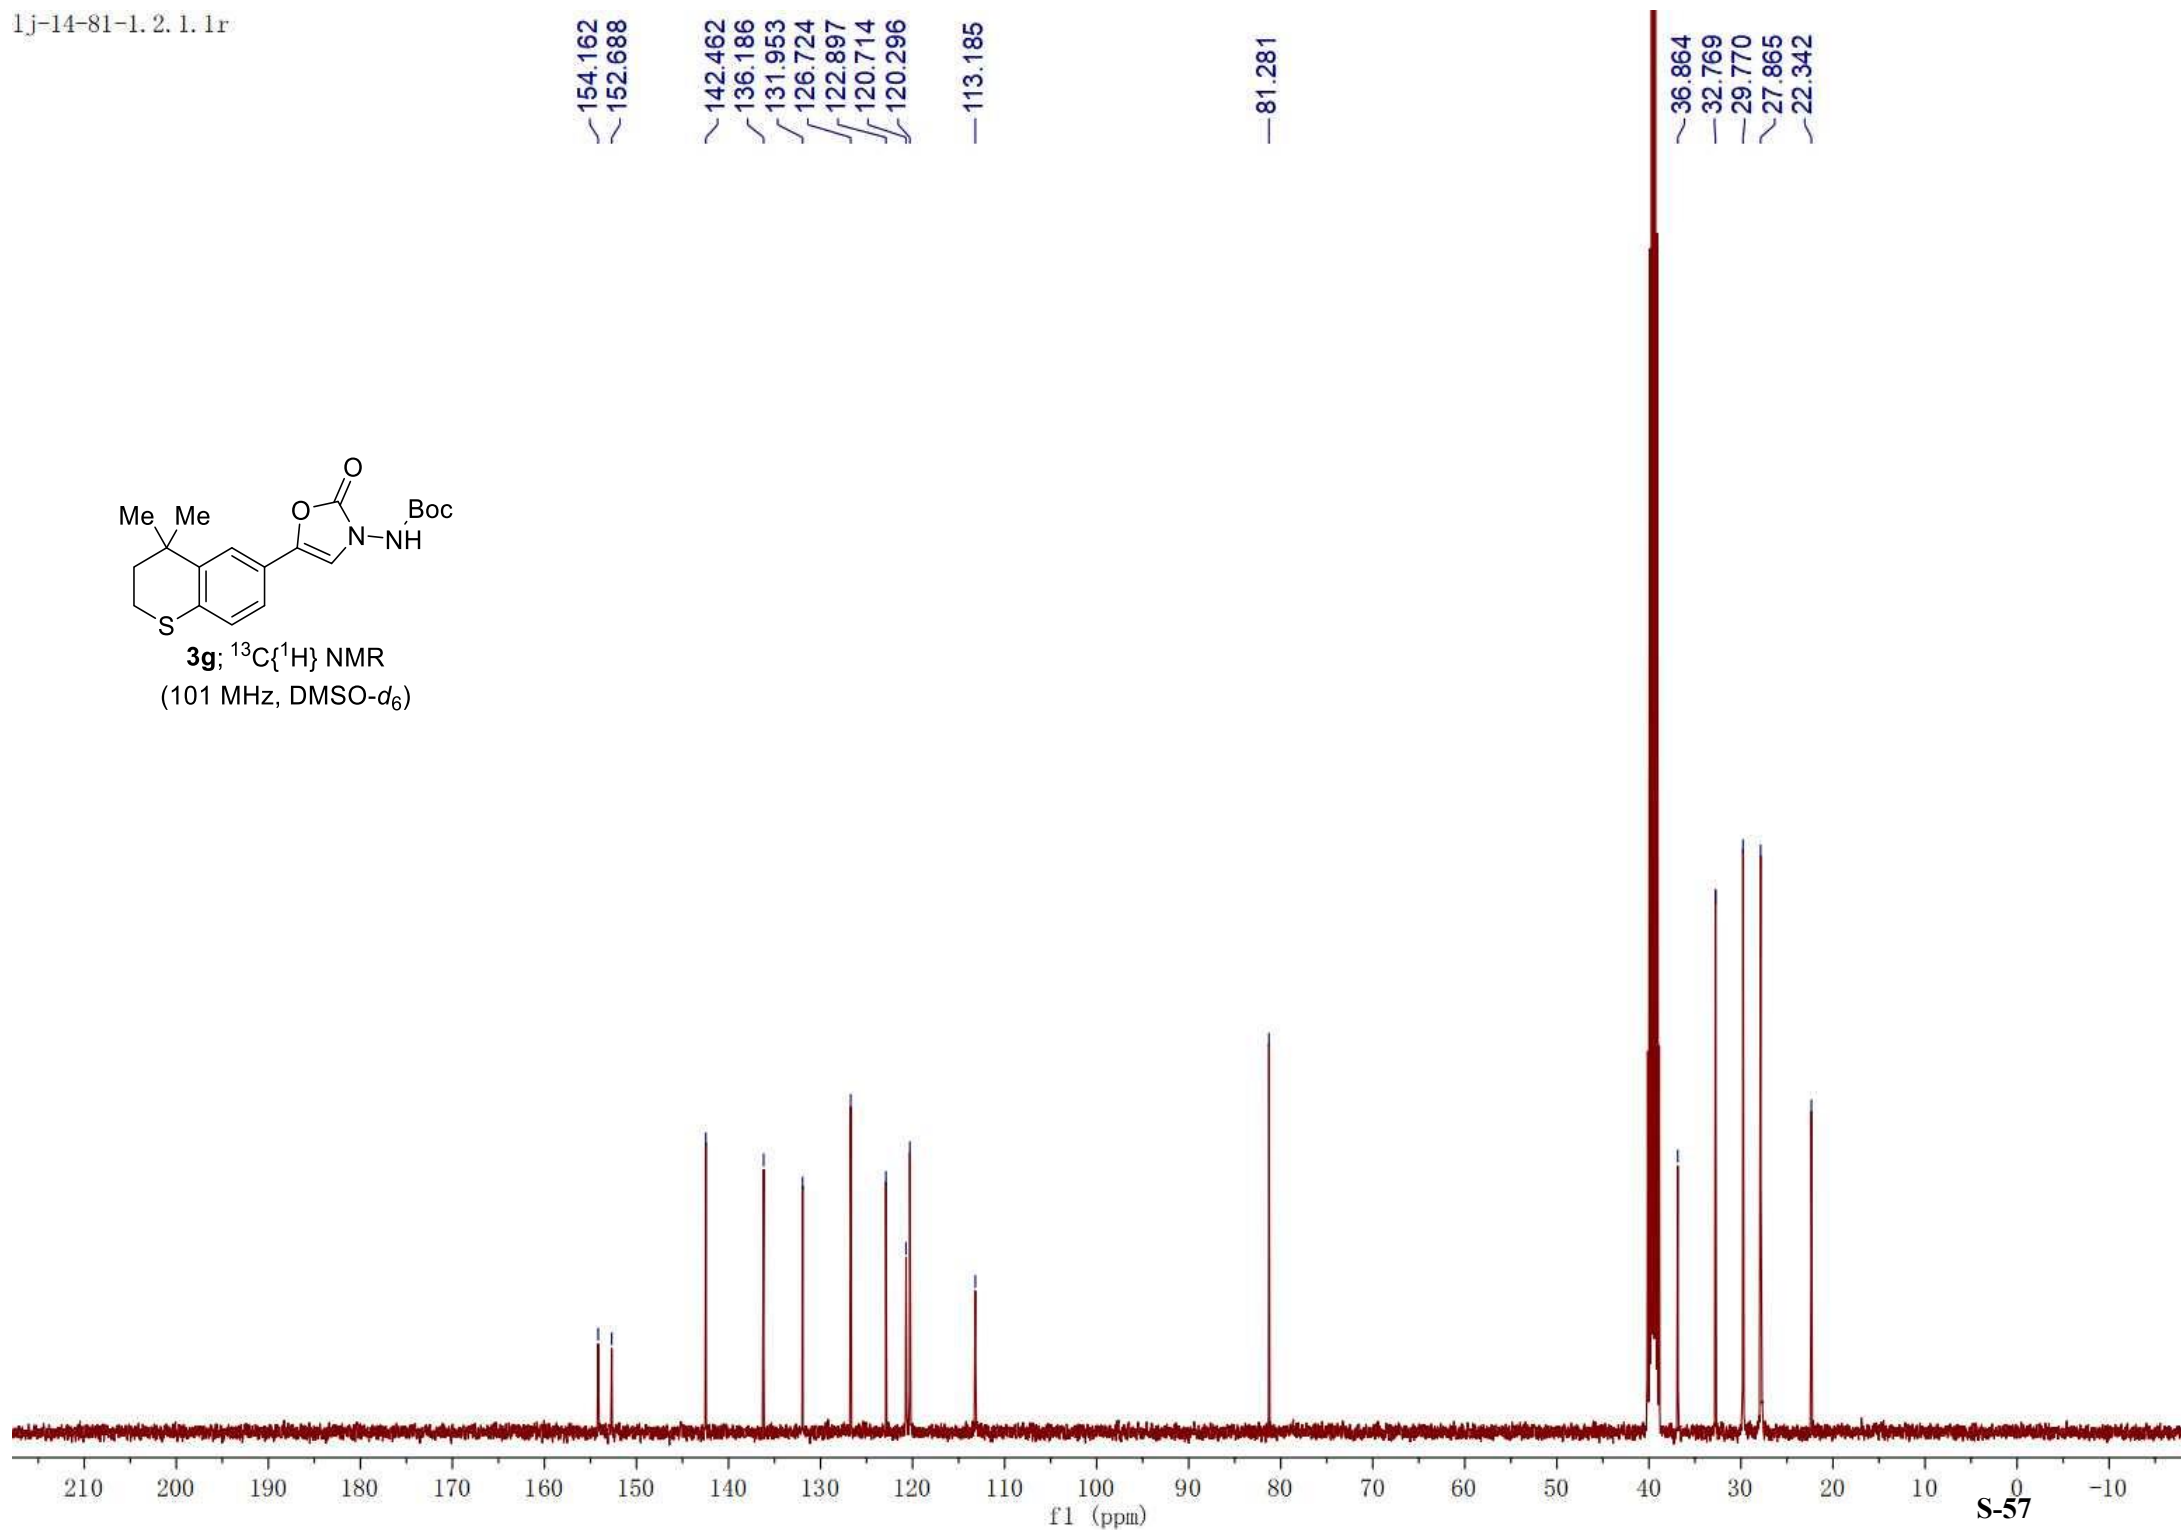

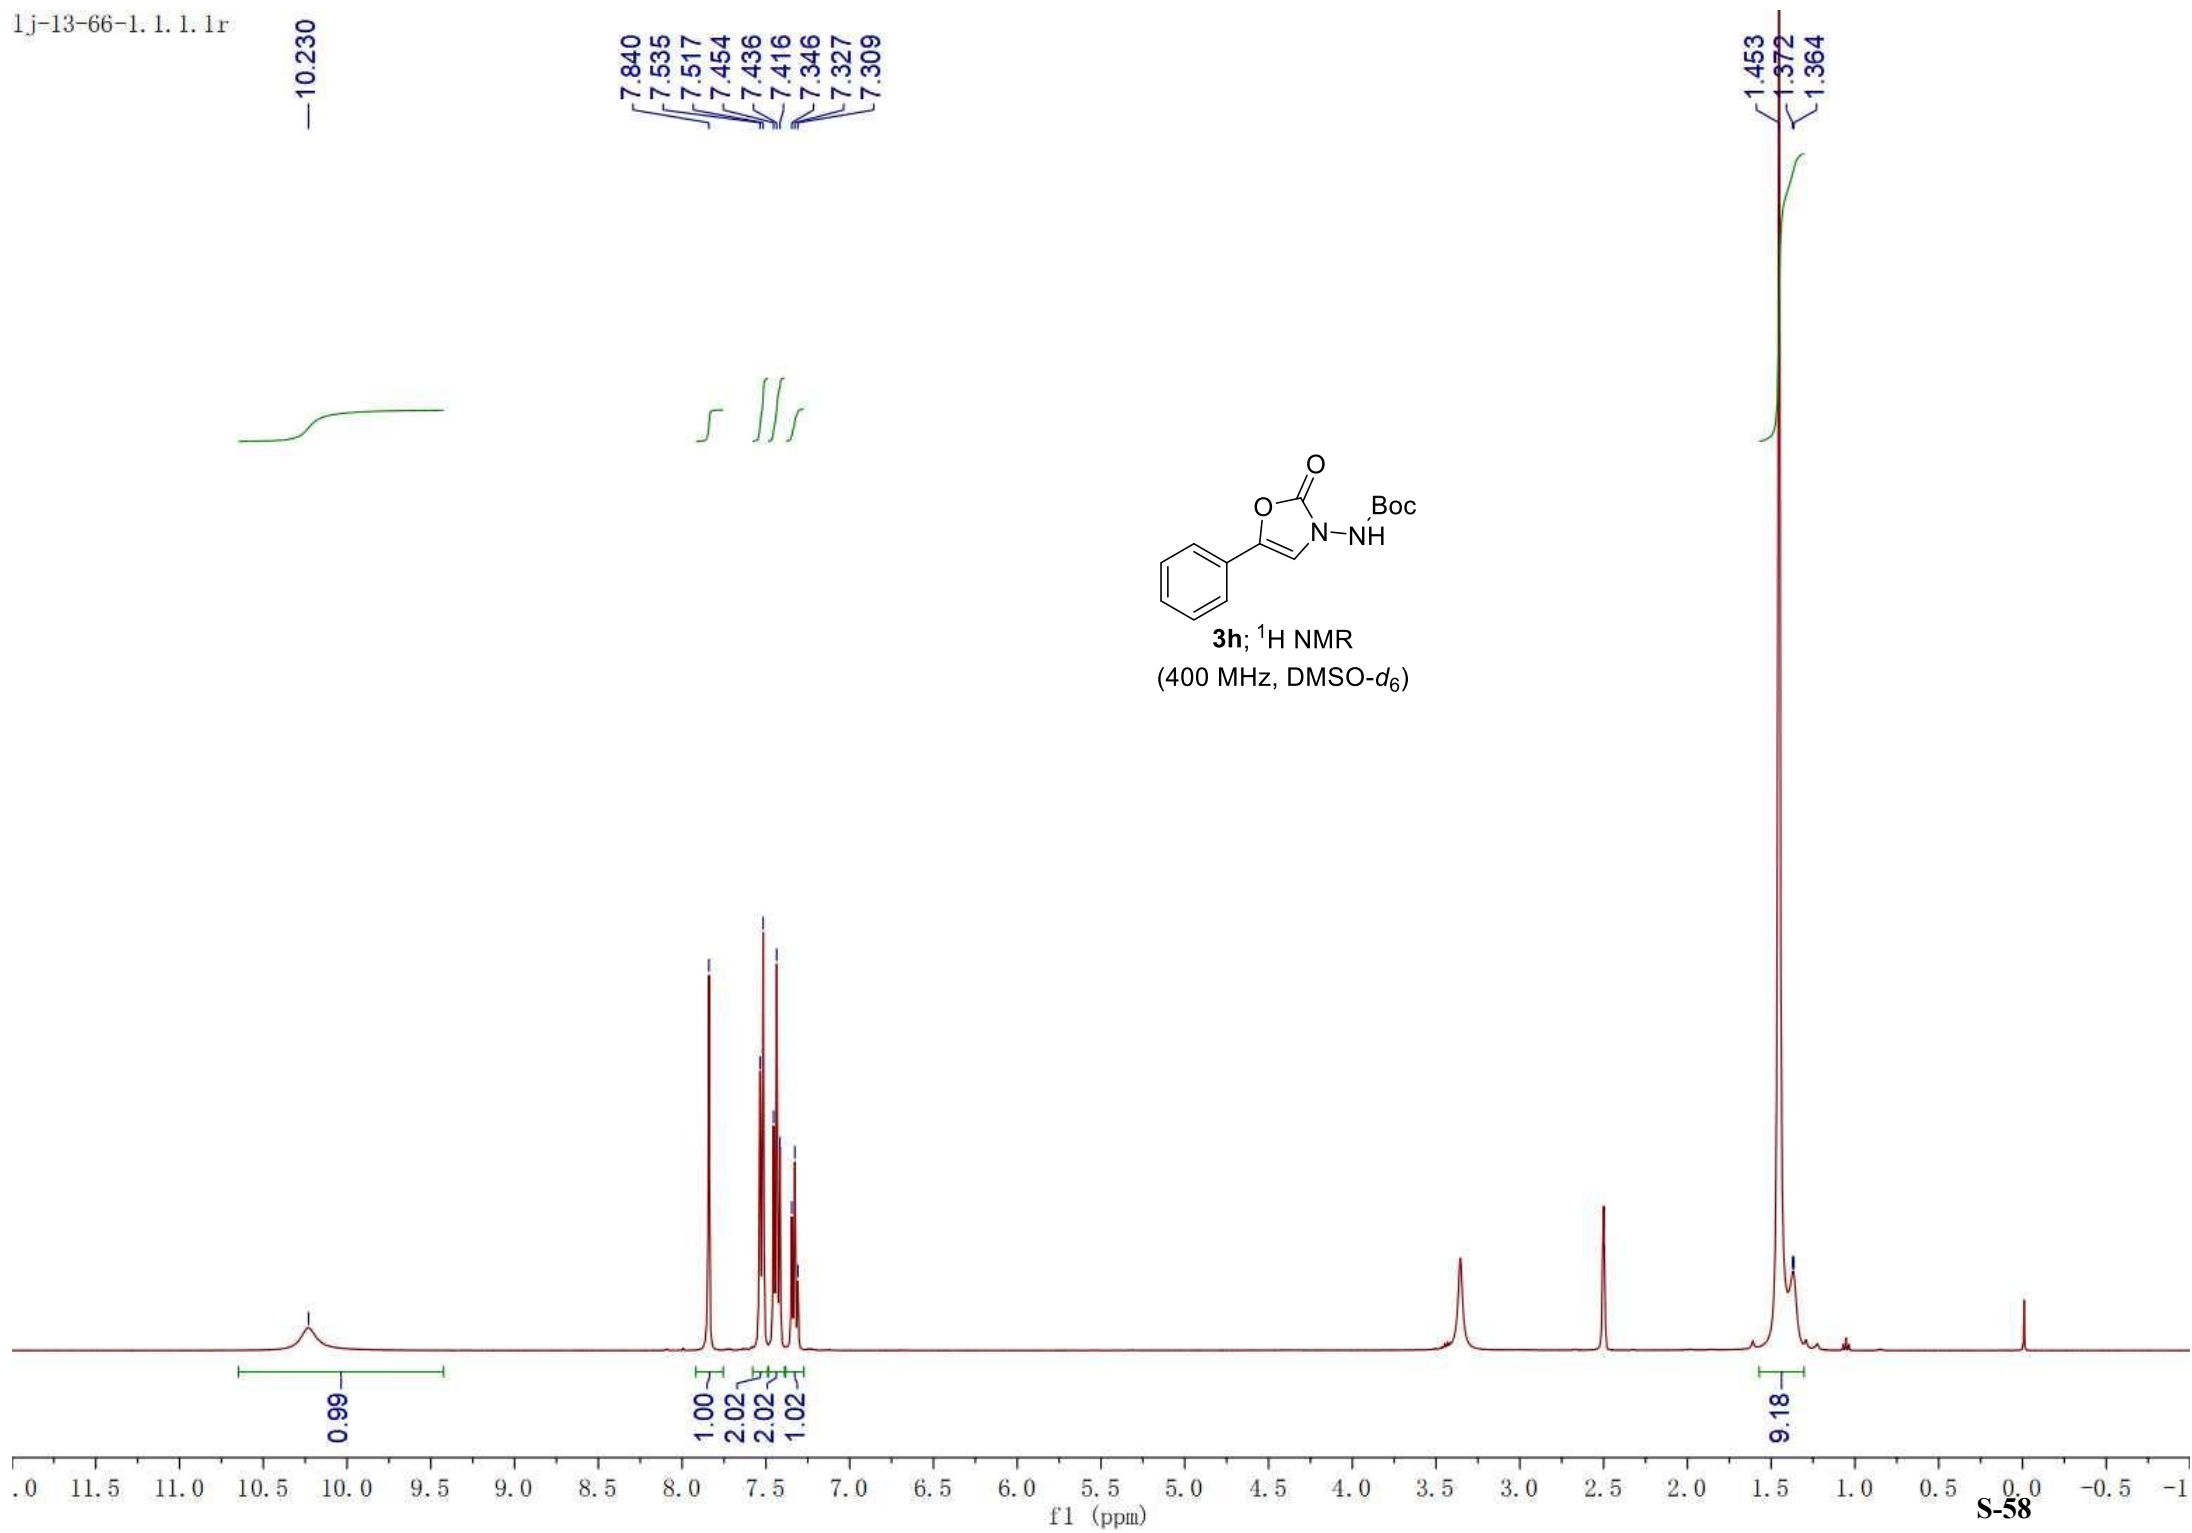

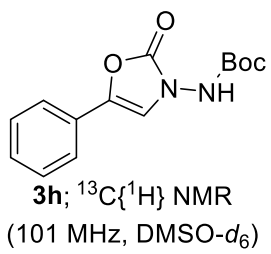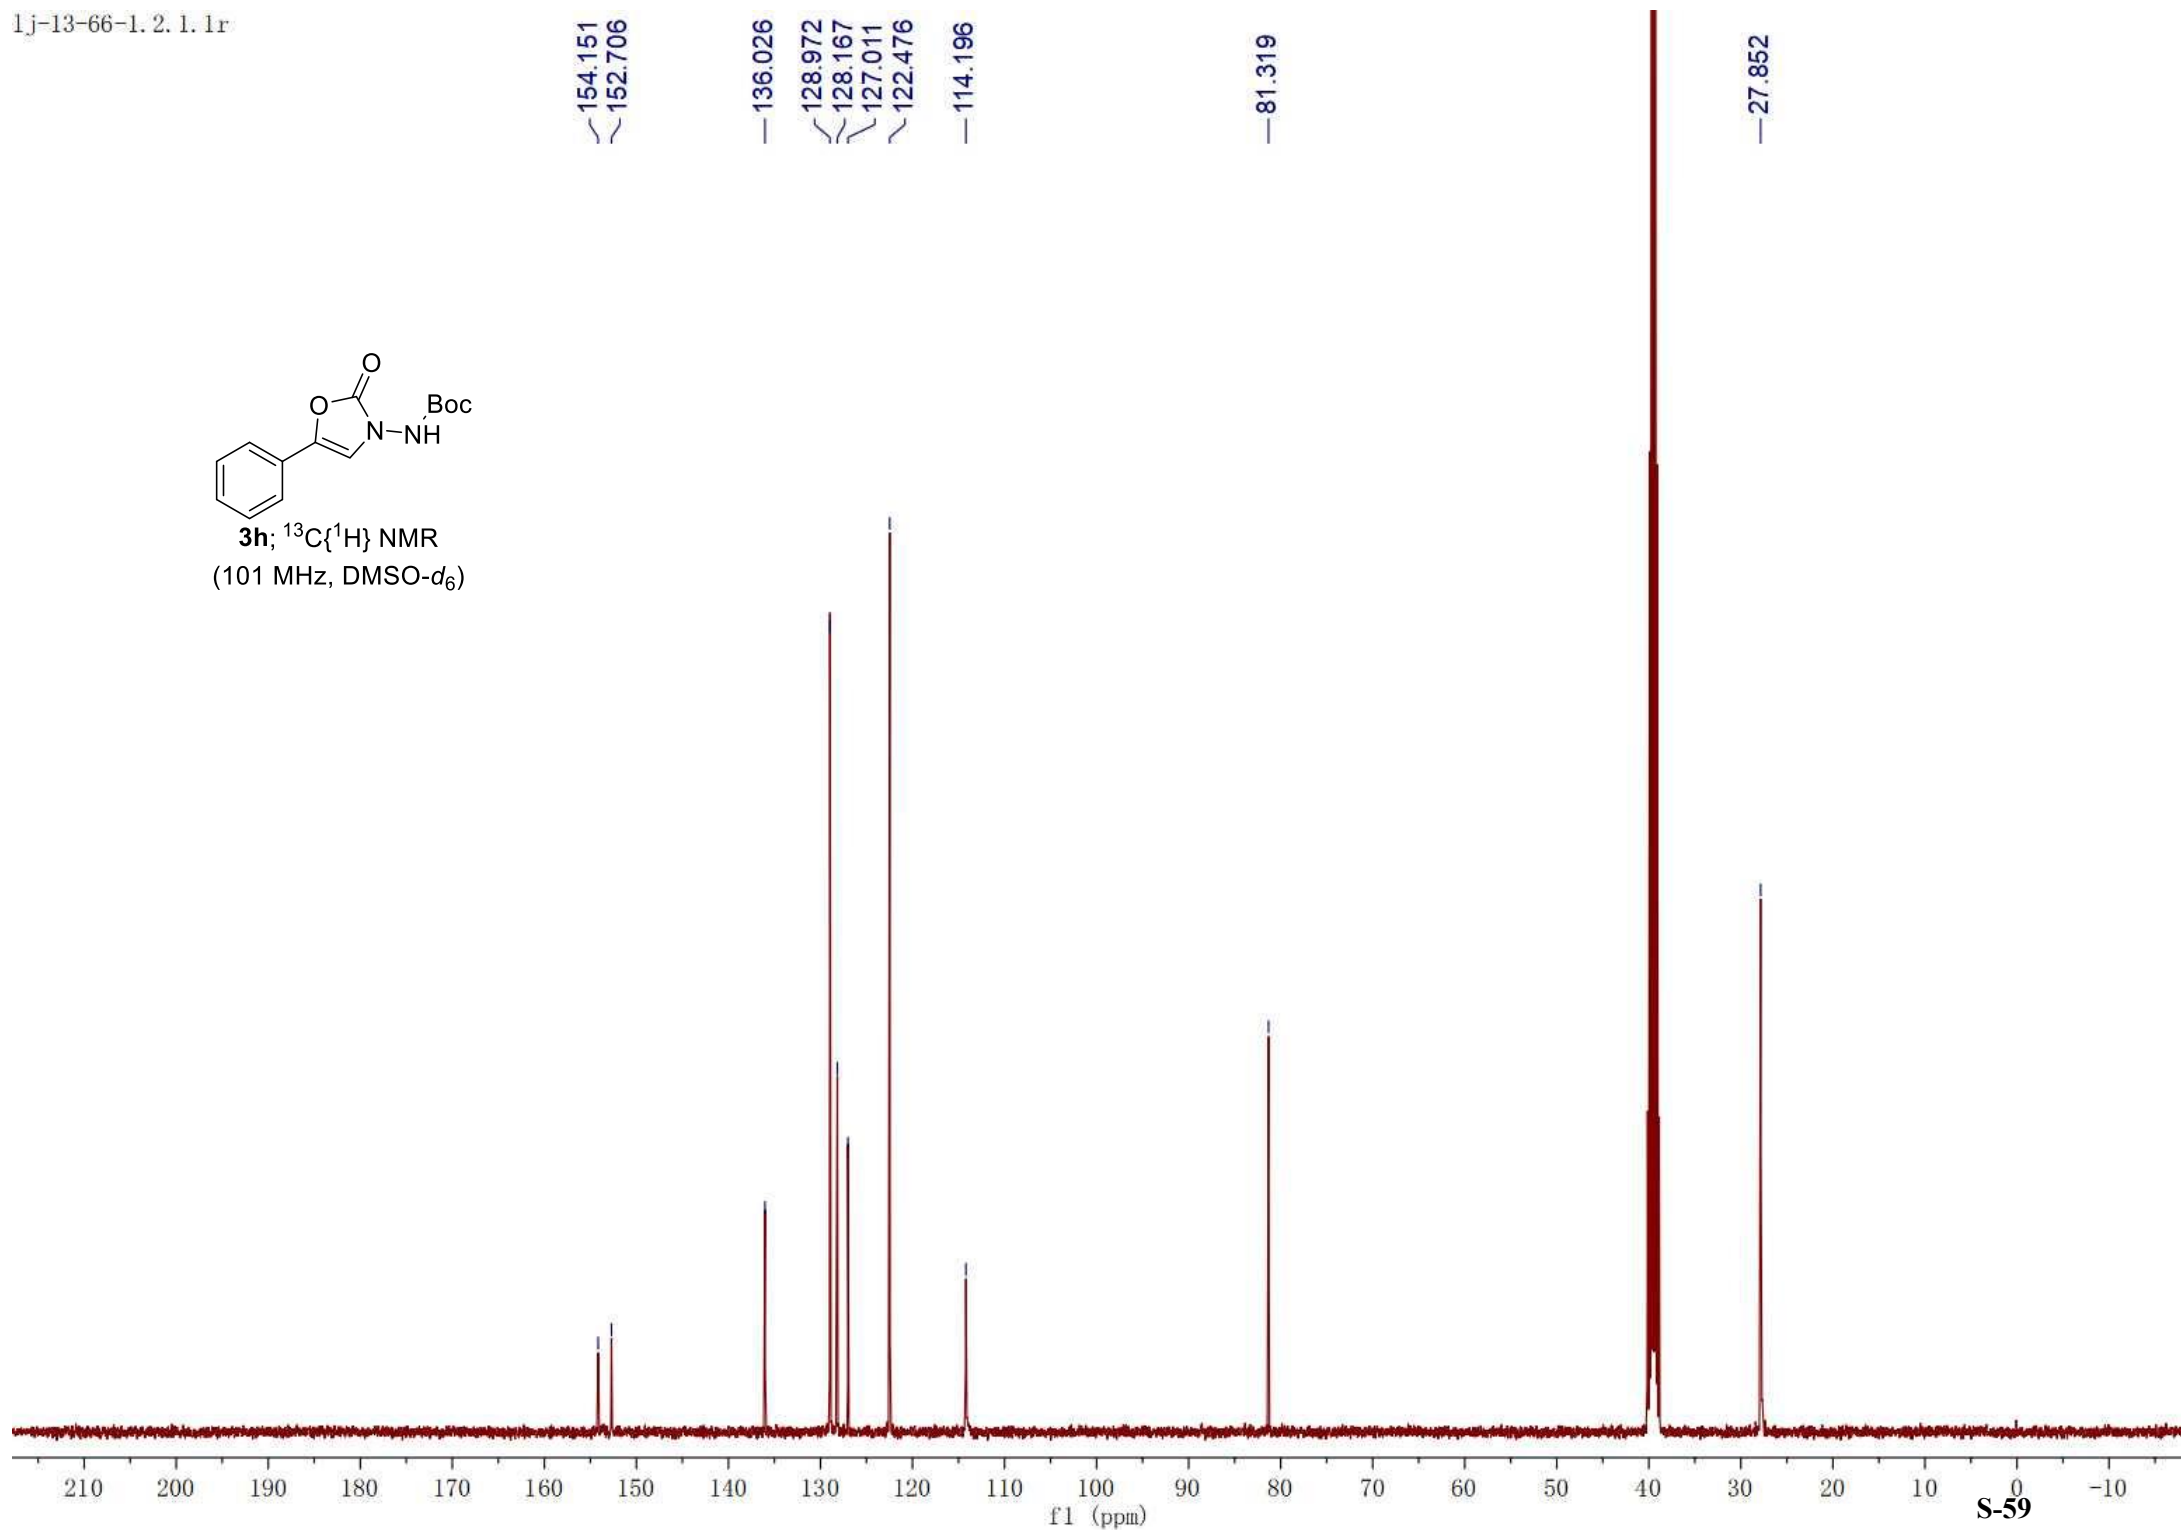

— 10.265  
— 9.849

7.811  
7.588  
7.574  
7.566  
7.552  
7.313  
7.291  
7.269

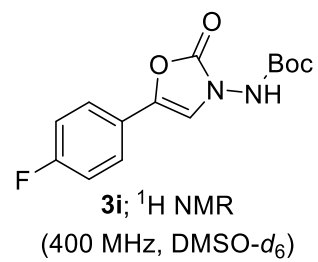

1.449  
1.418  
1.380  
1.361

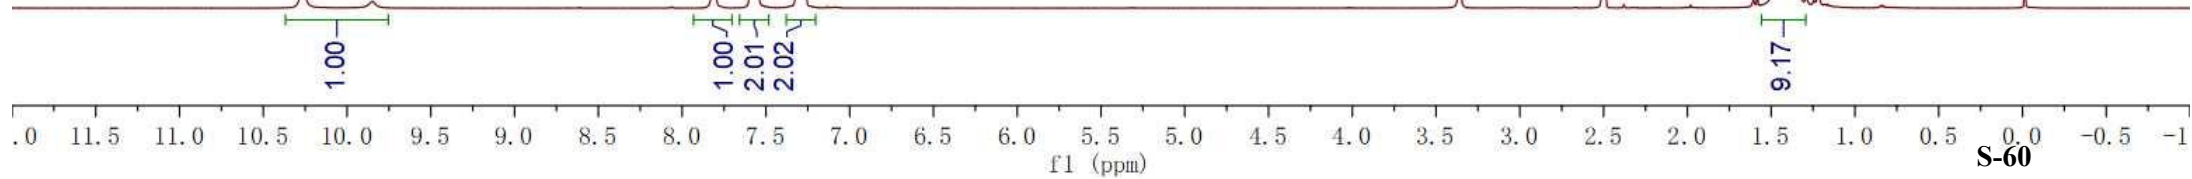



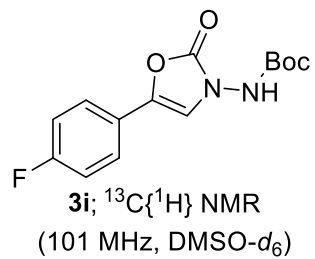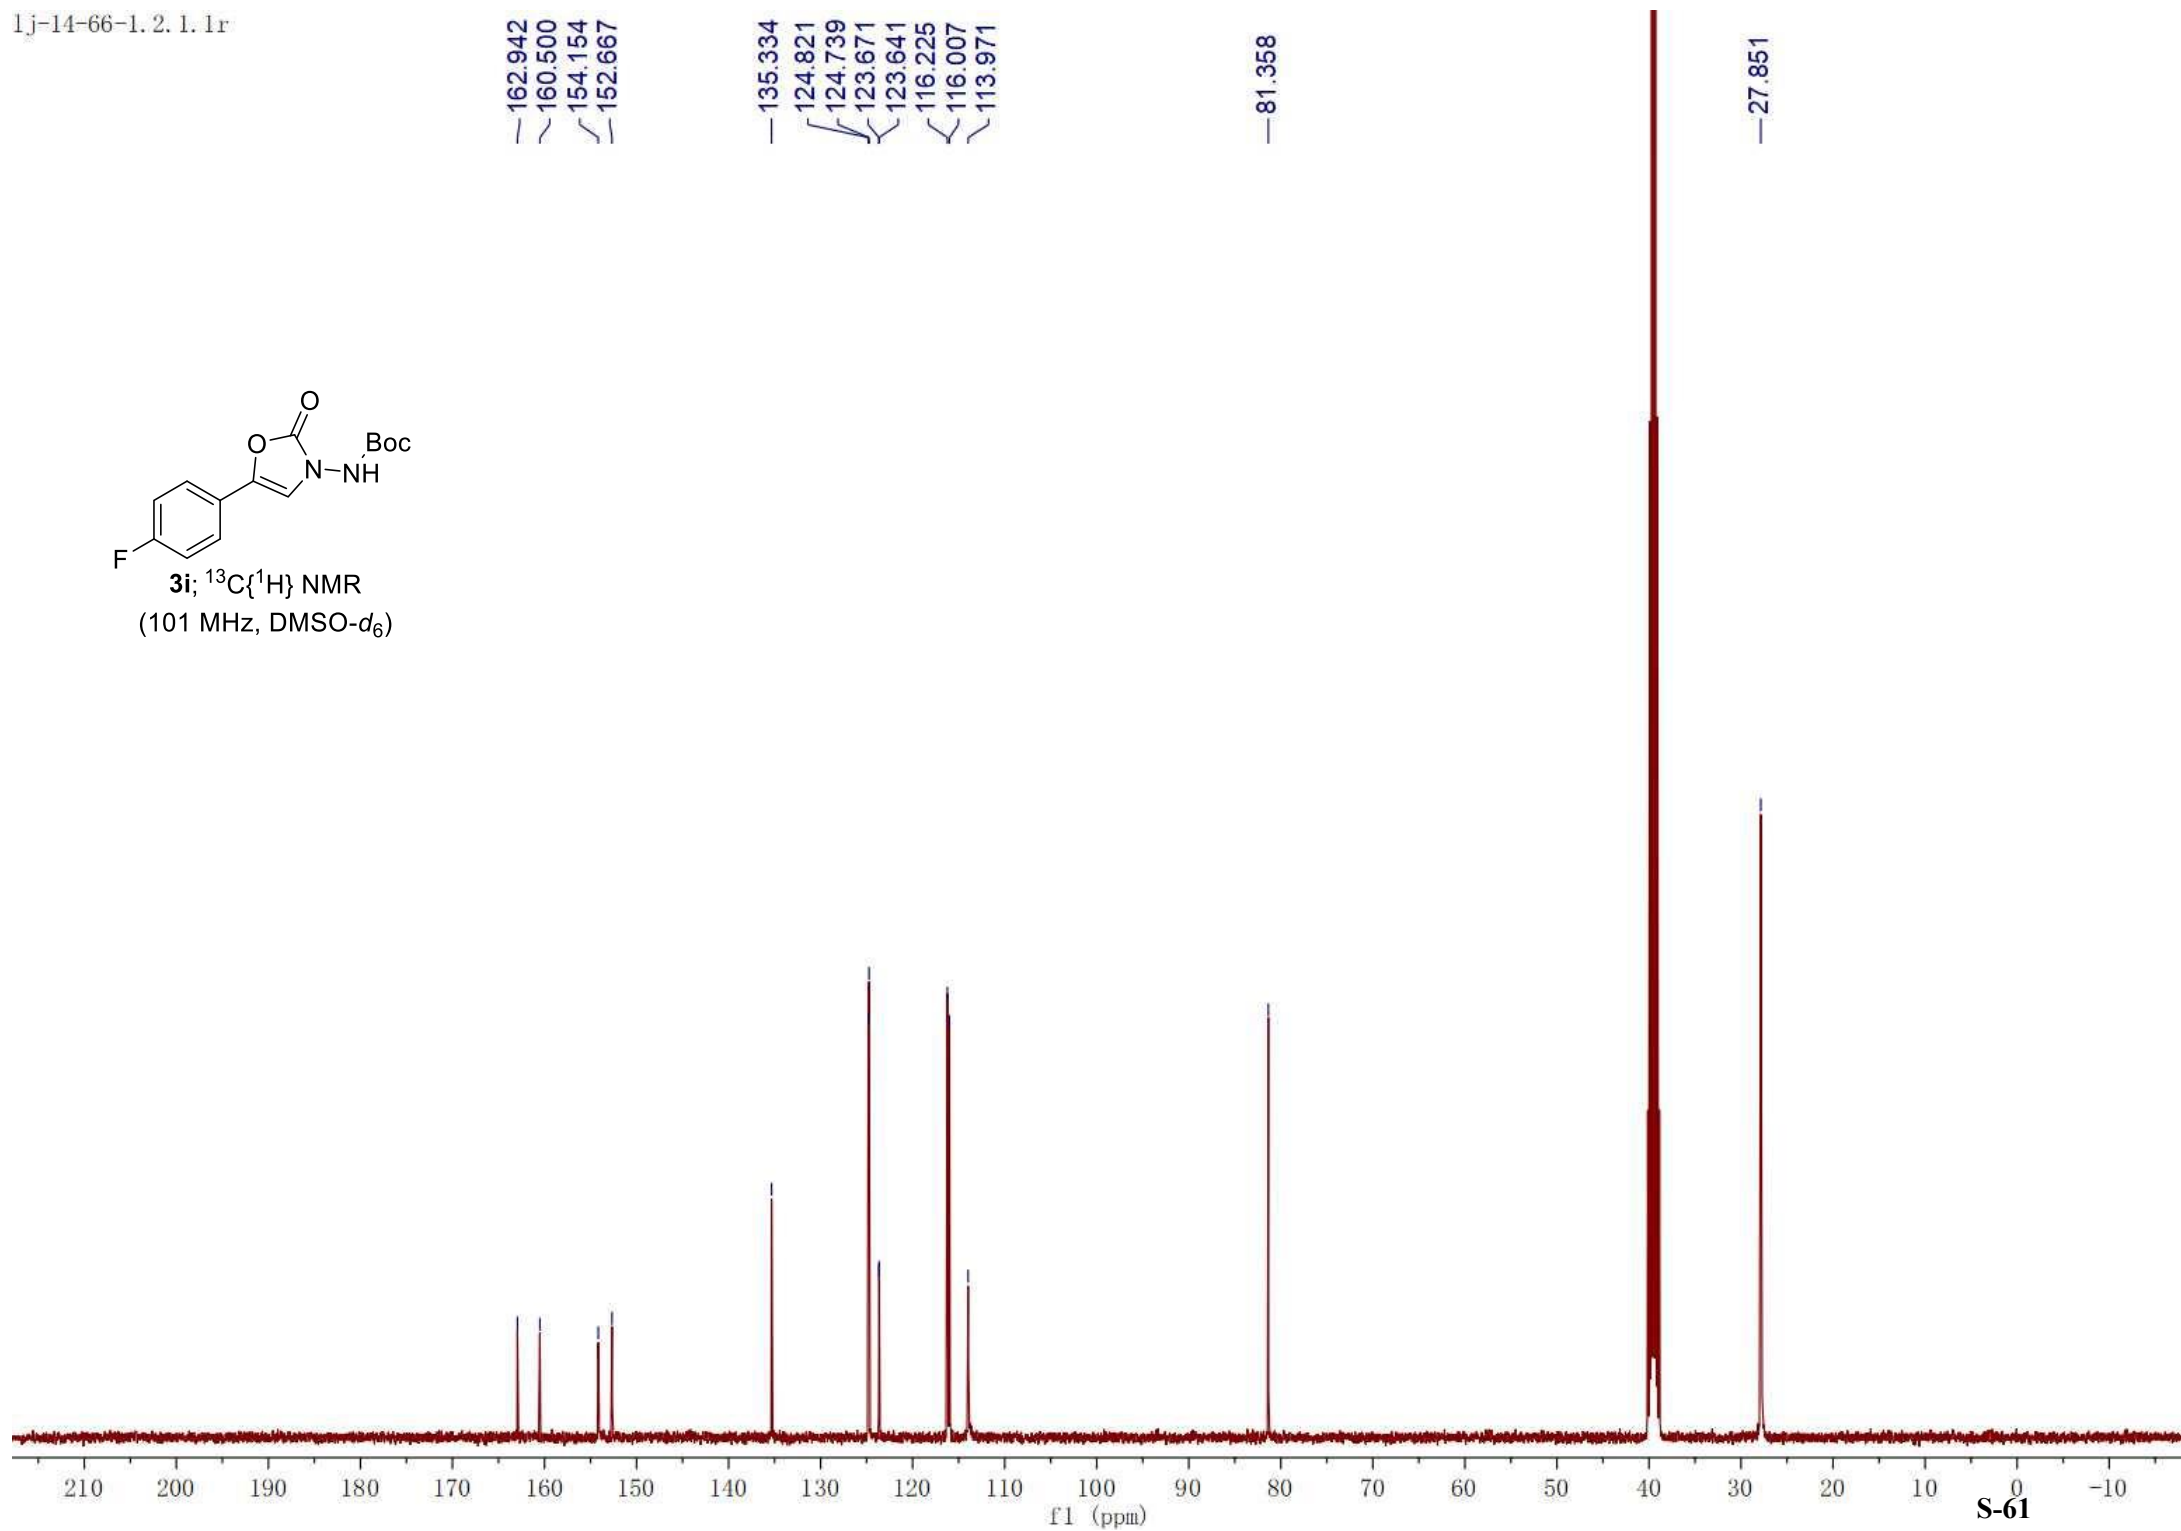

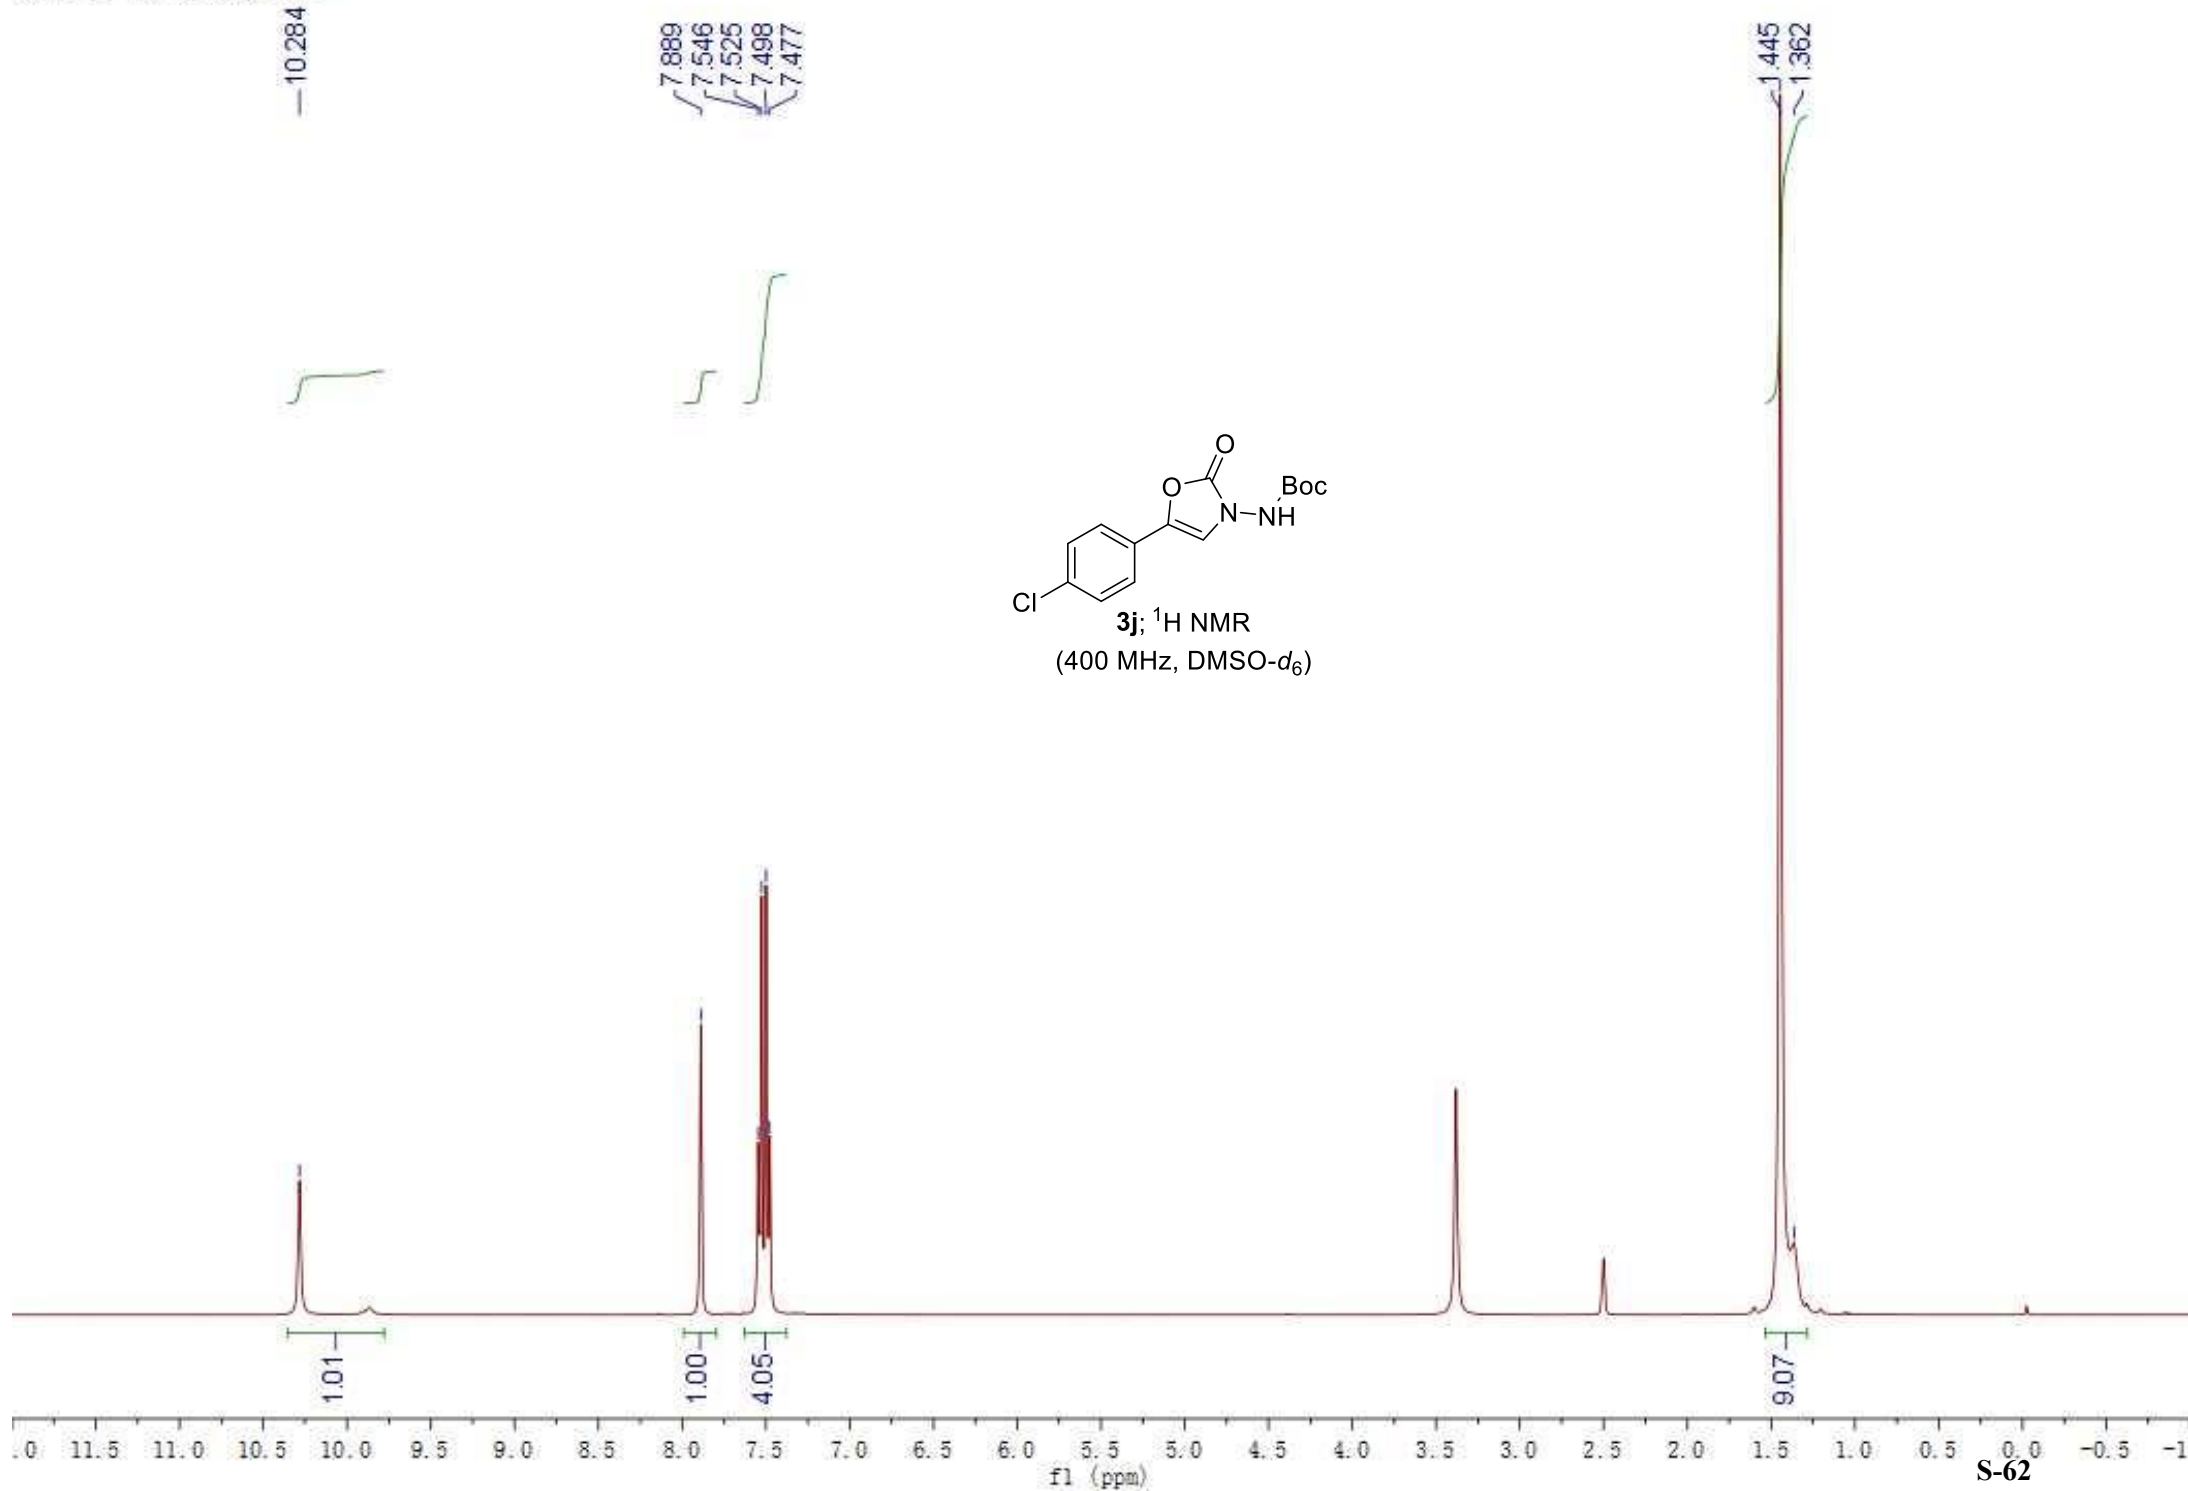

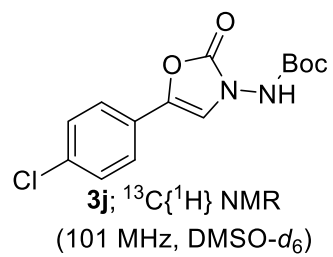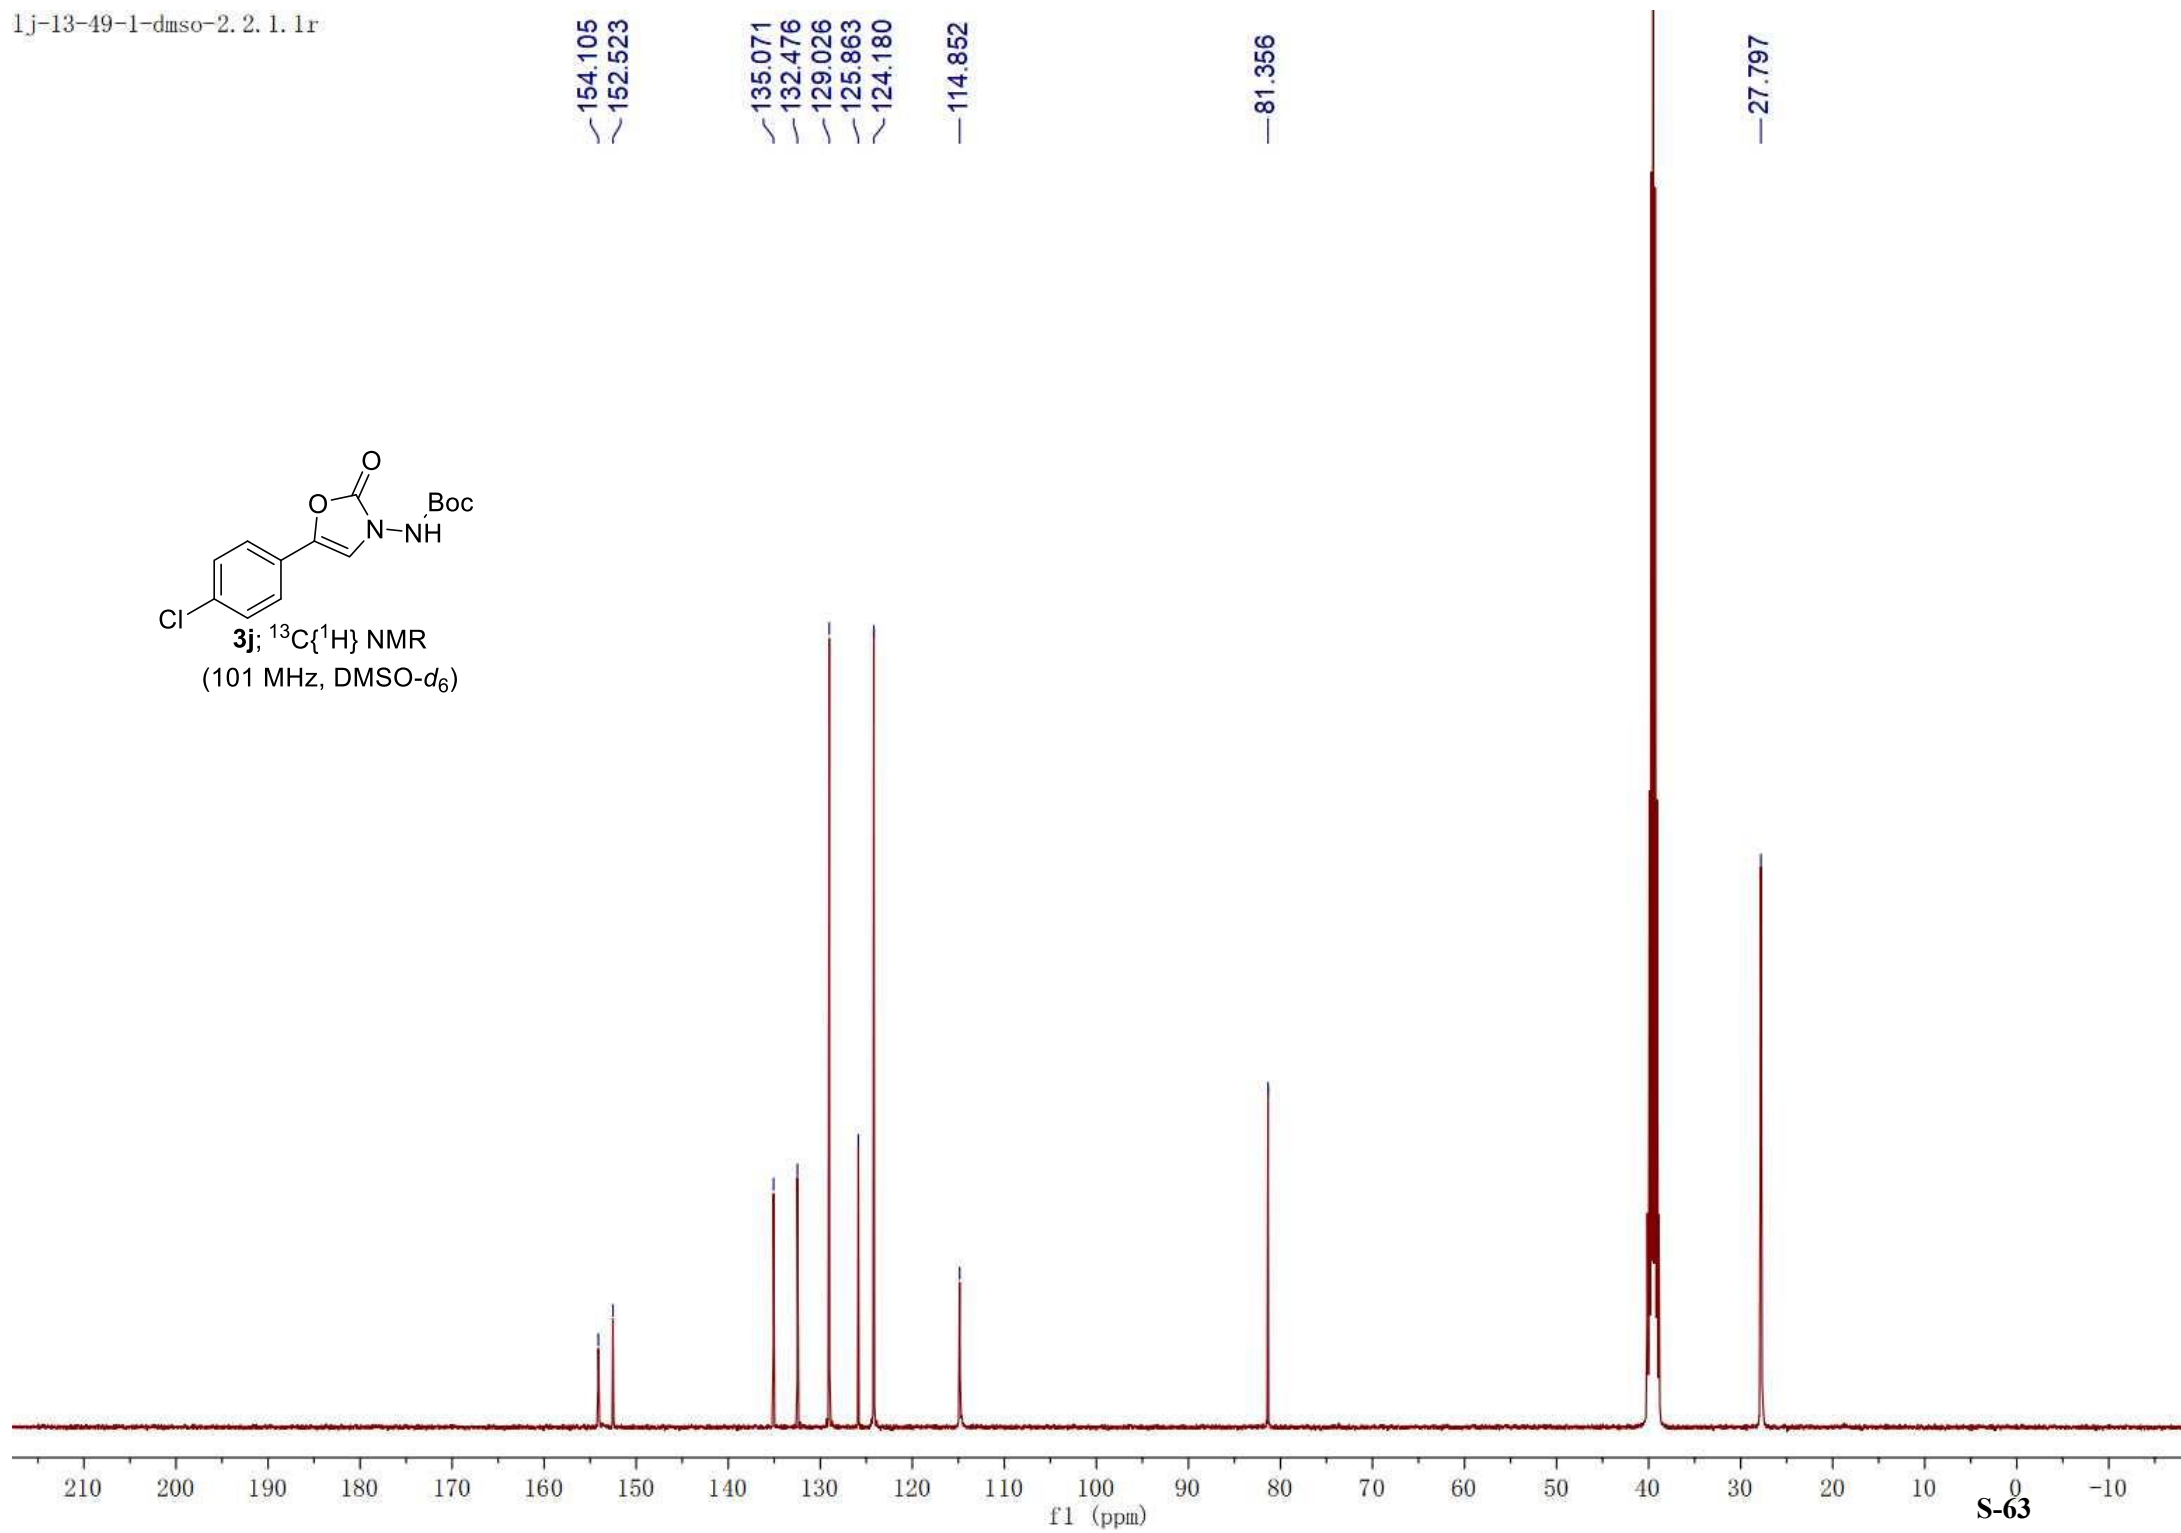

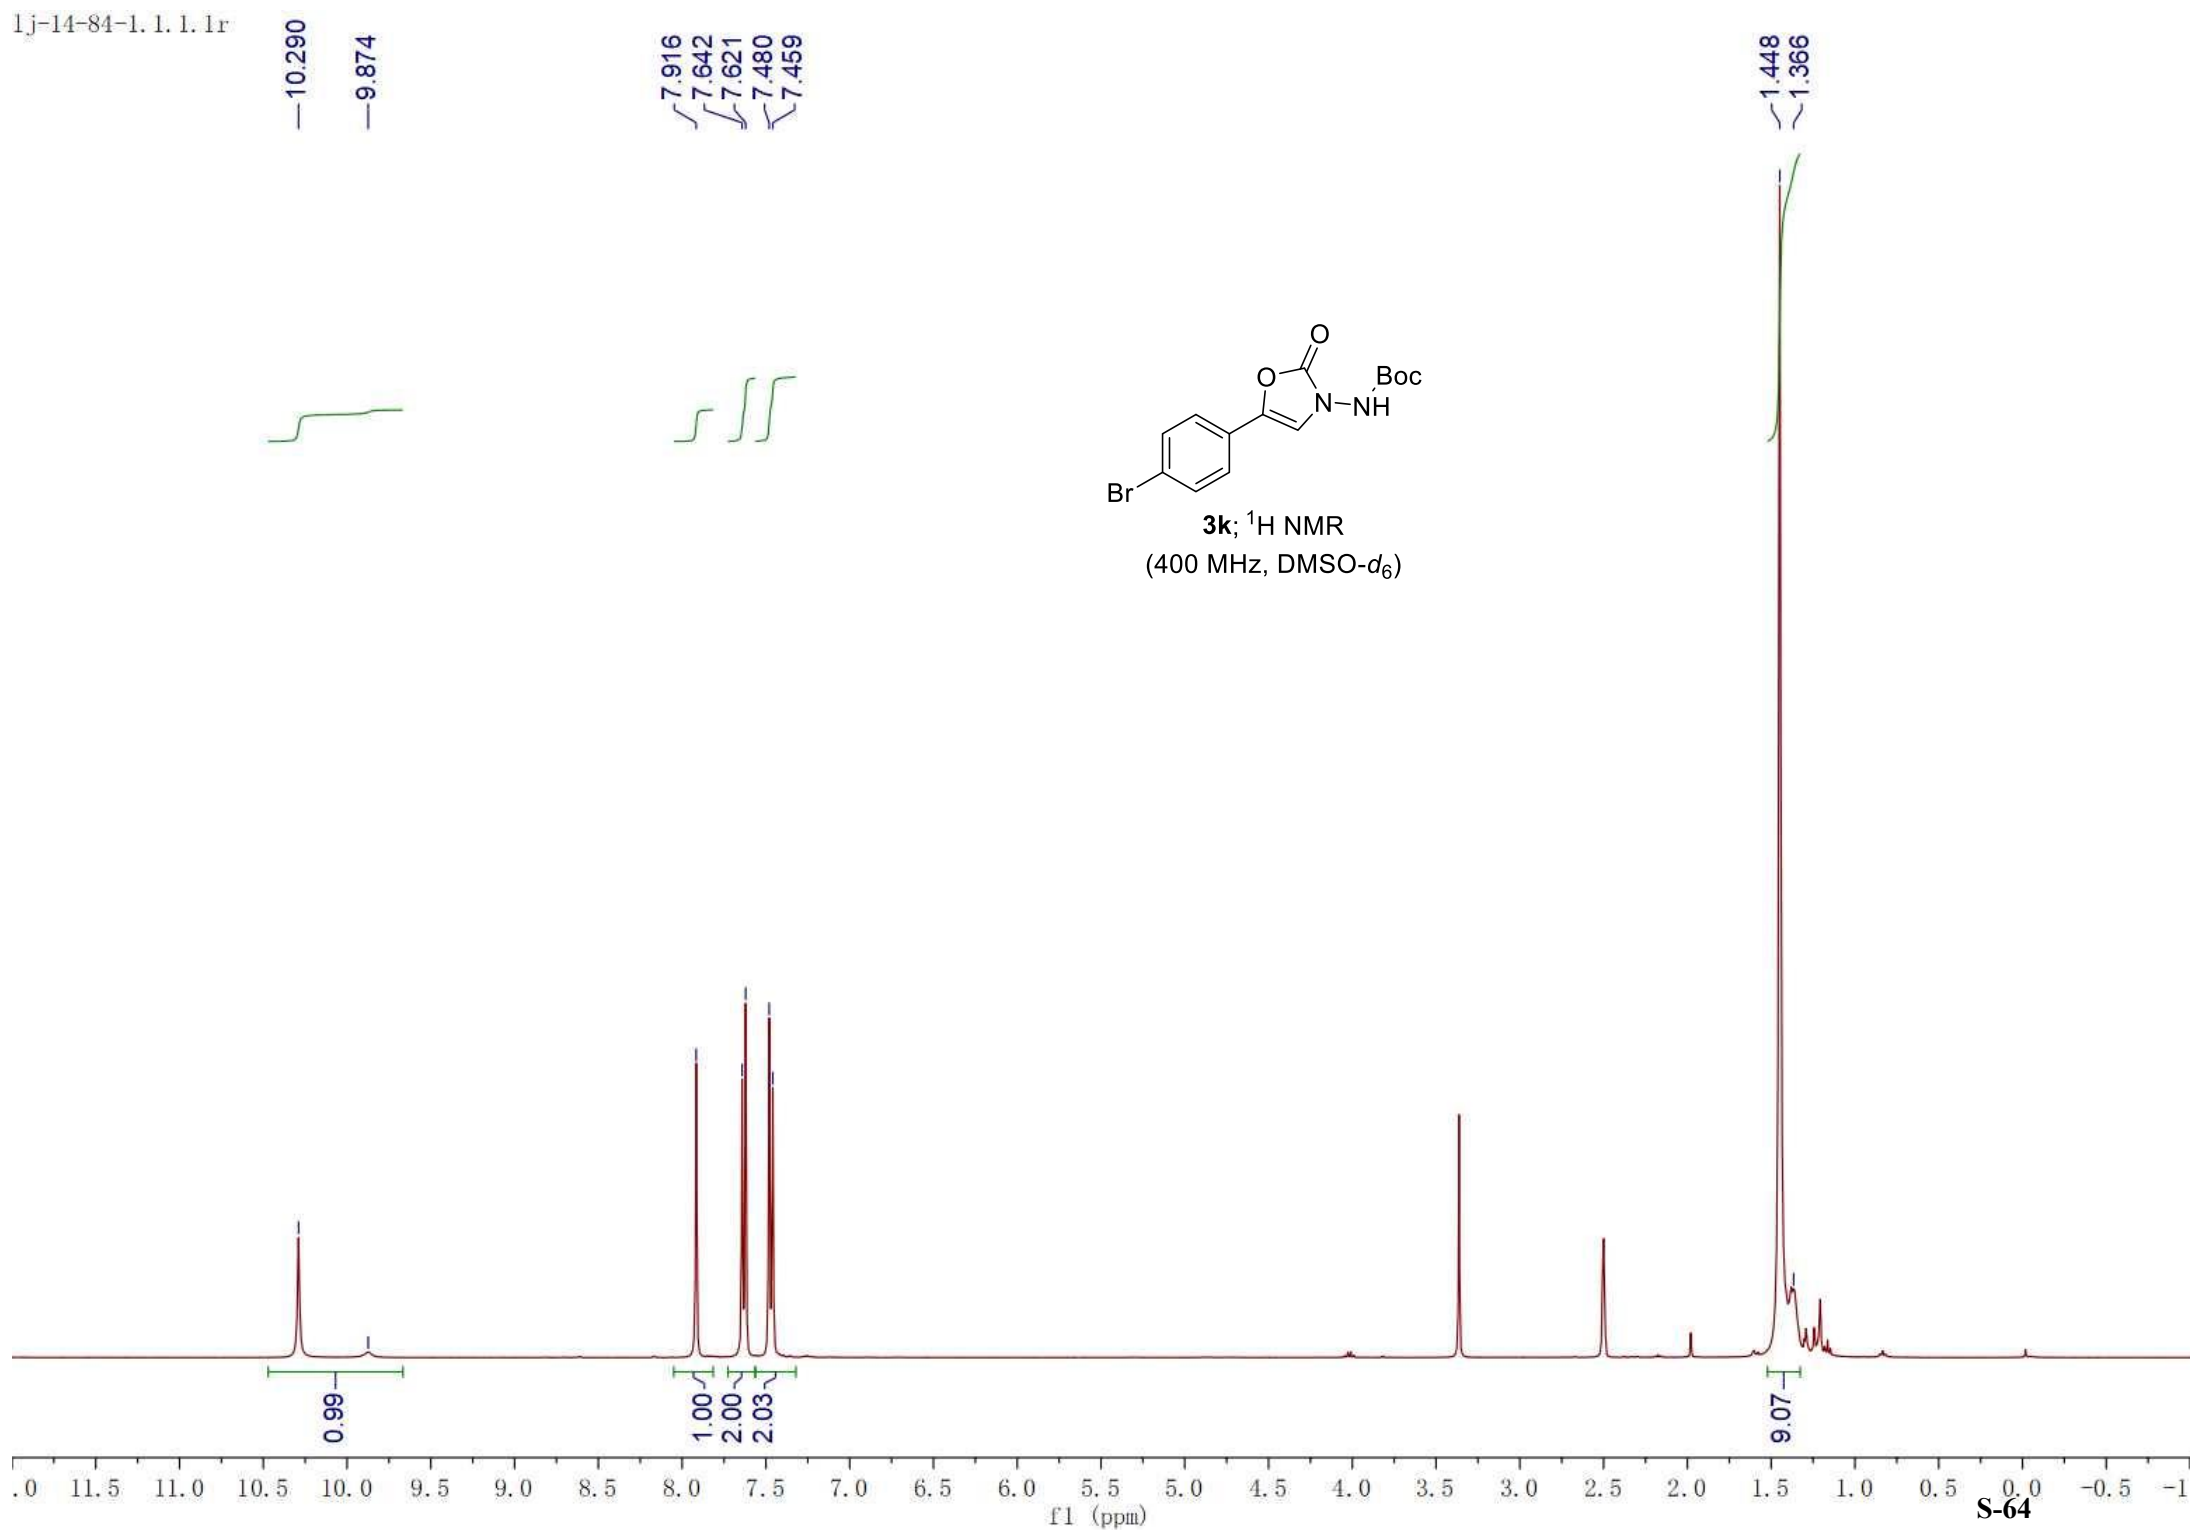

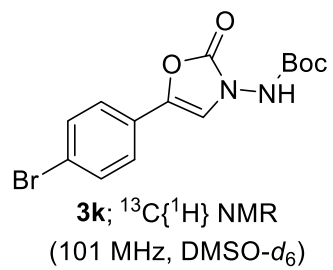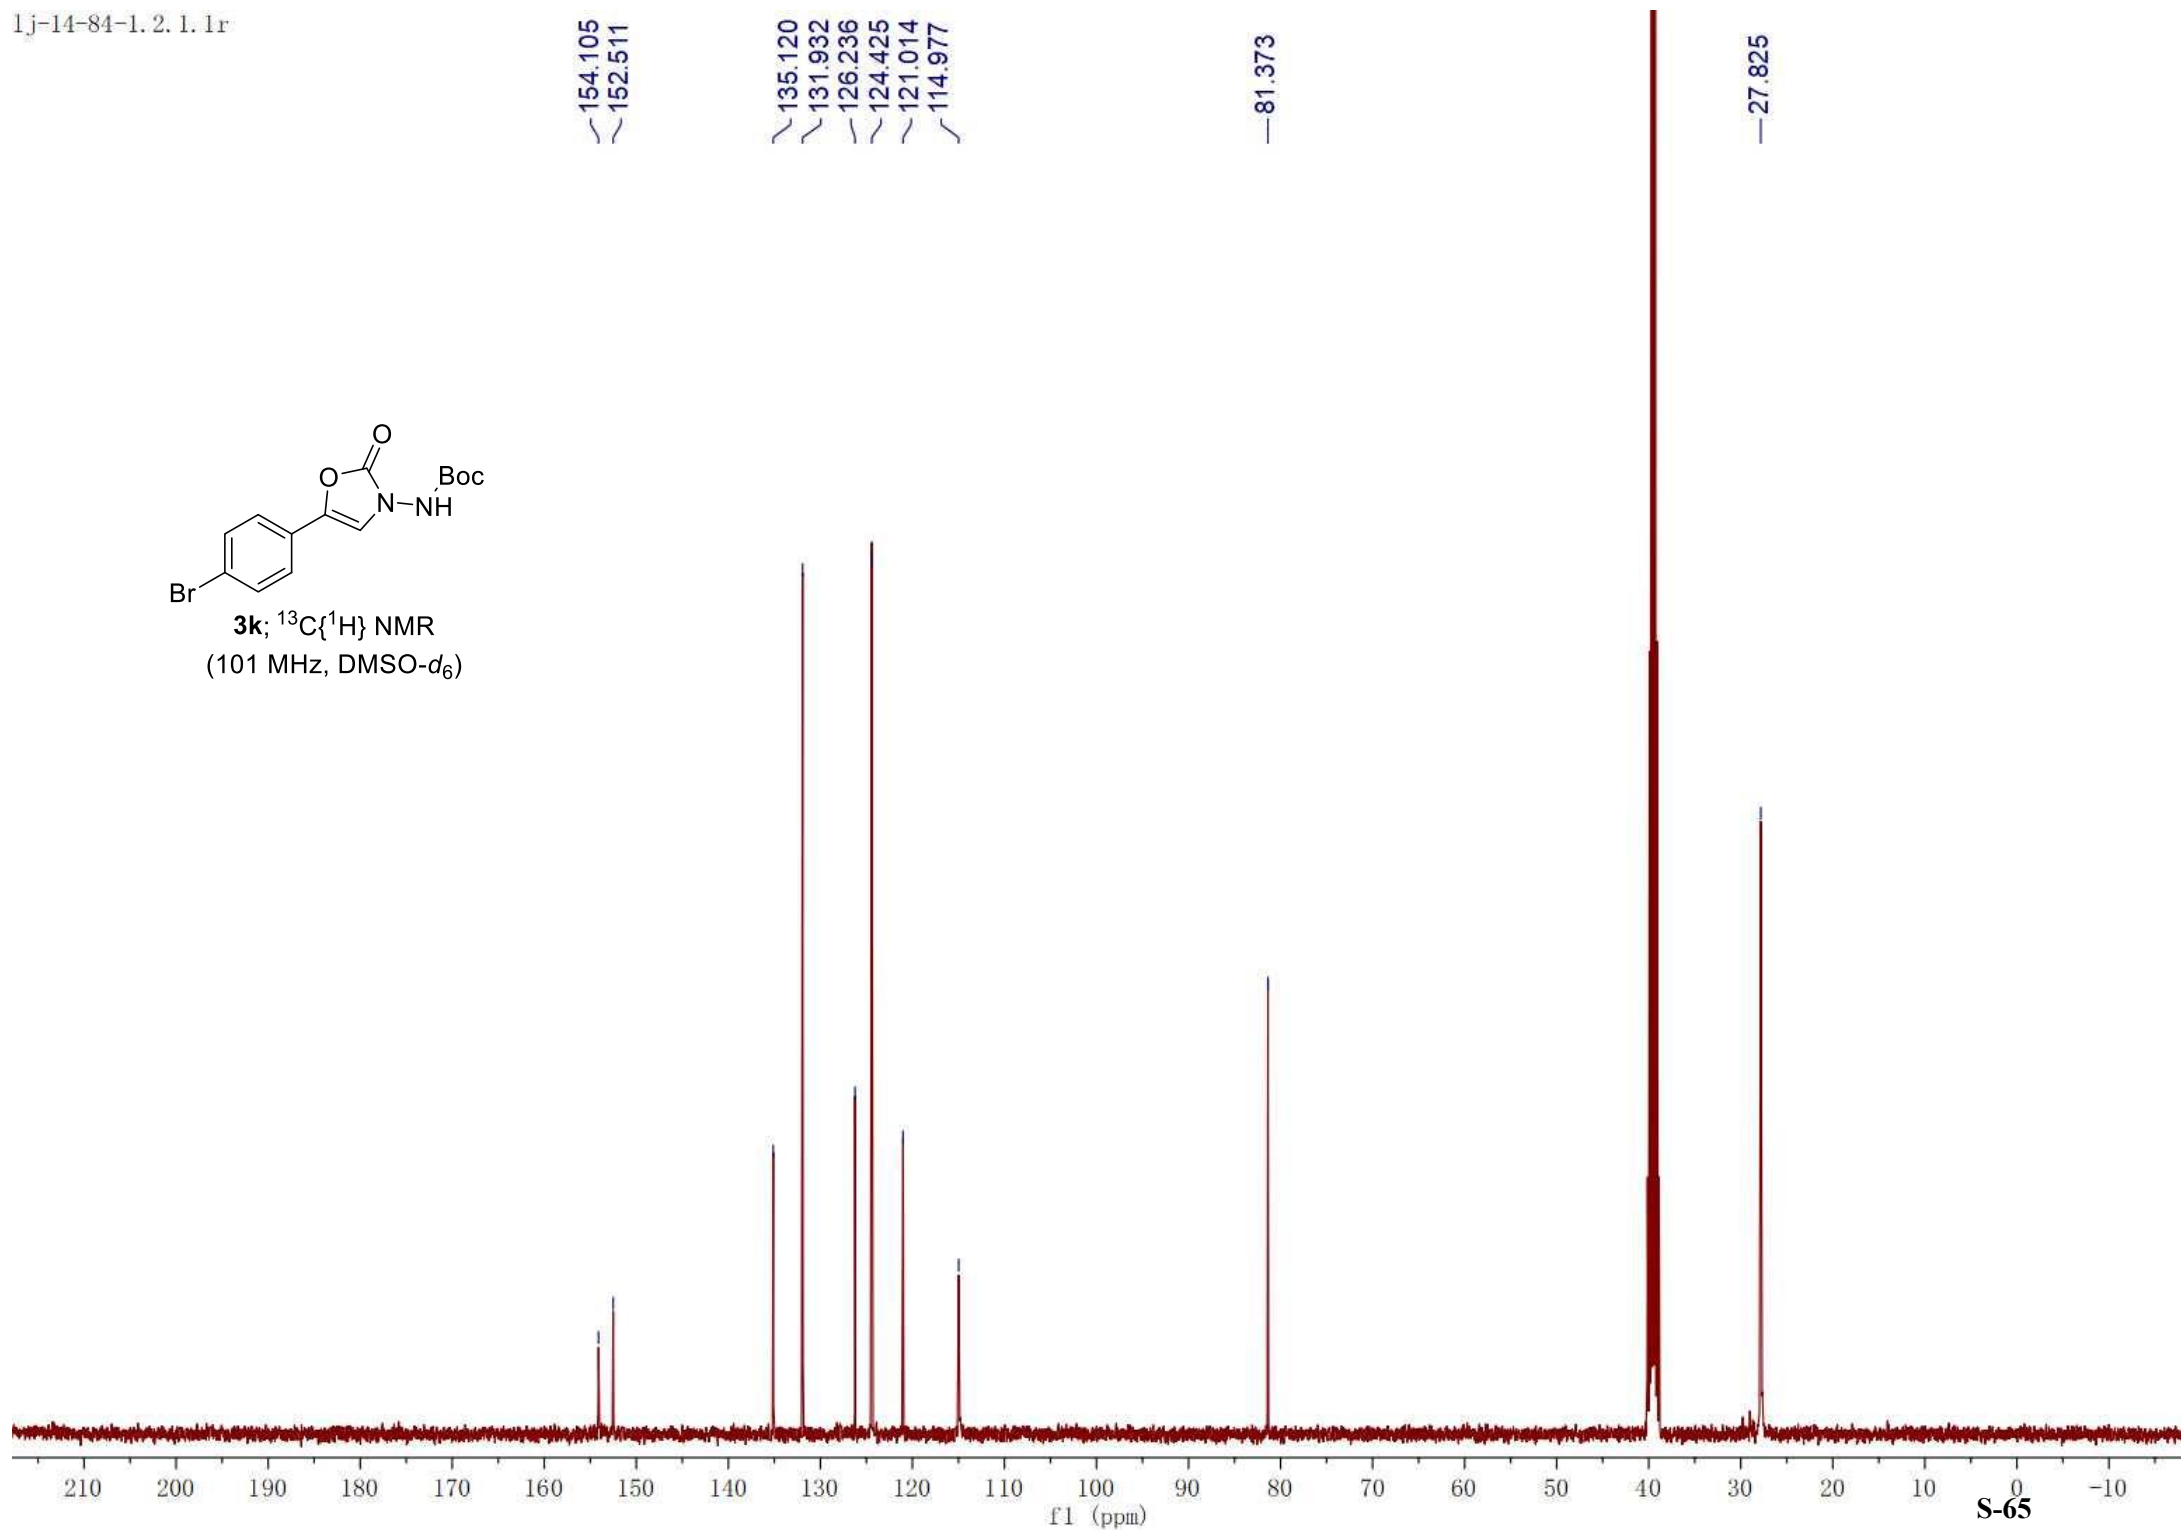

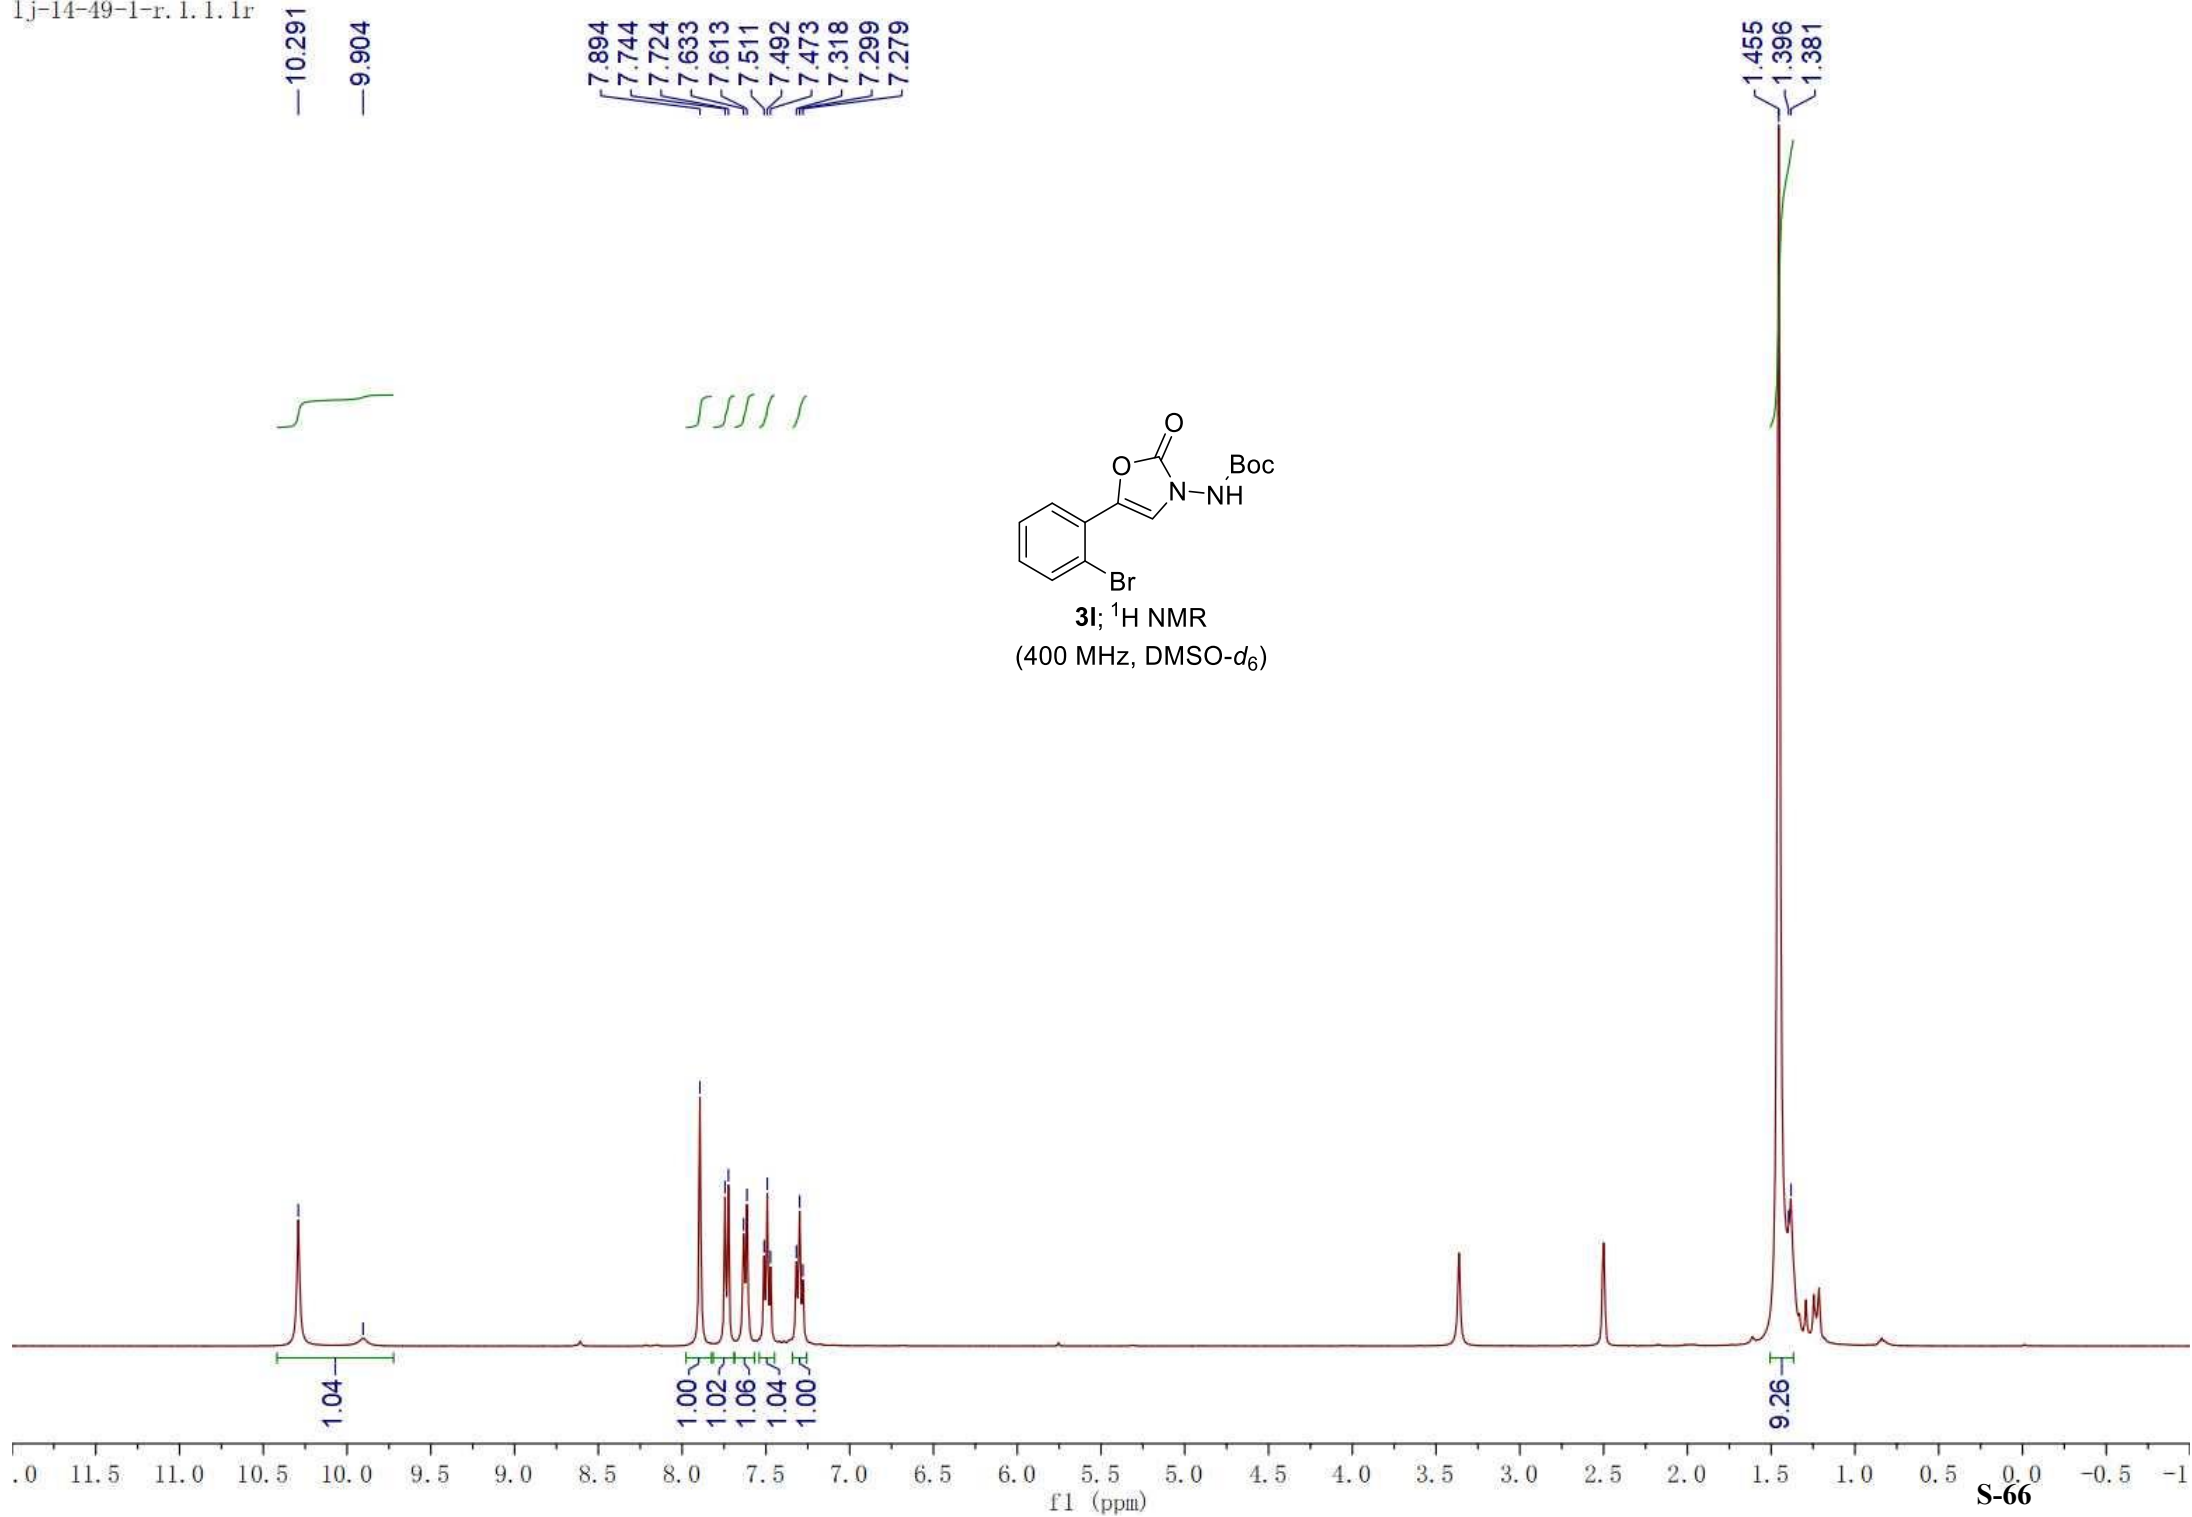

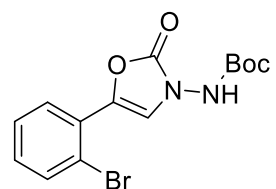

**3I**;  $^{13}\text{C}\{^1\text{H}\}$  NMR  
(101 MHz, DMSO- $d_6$ )

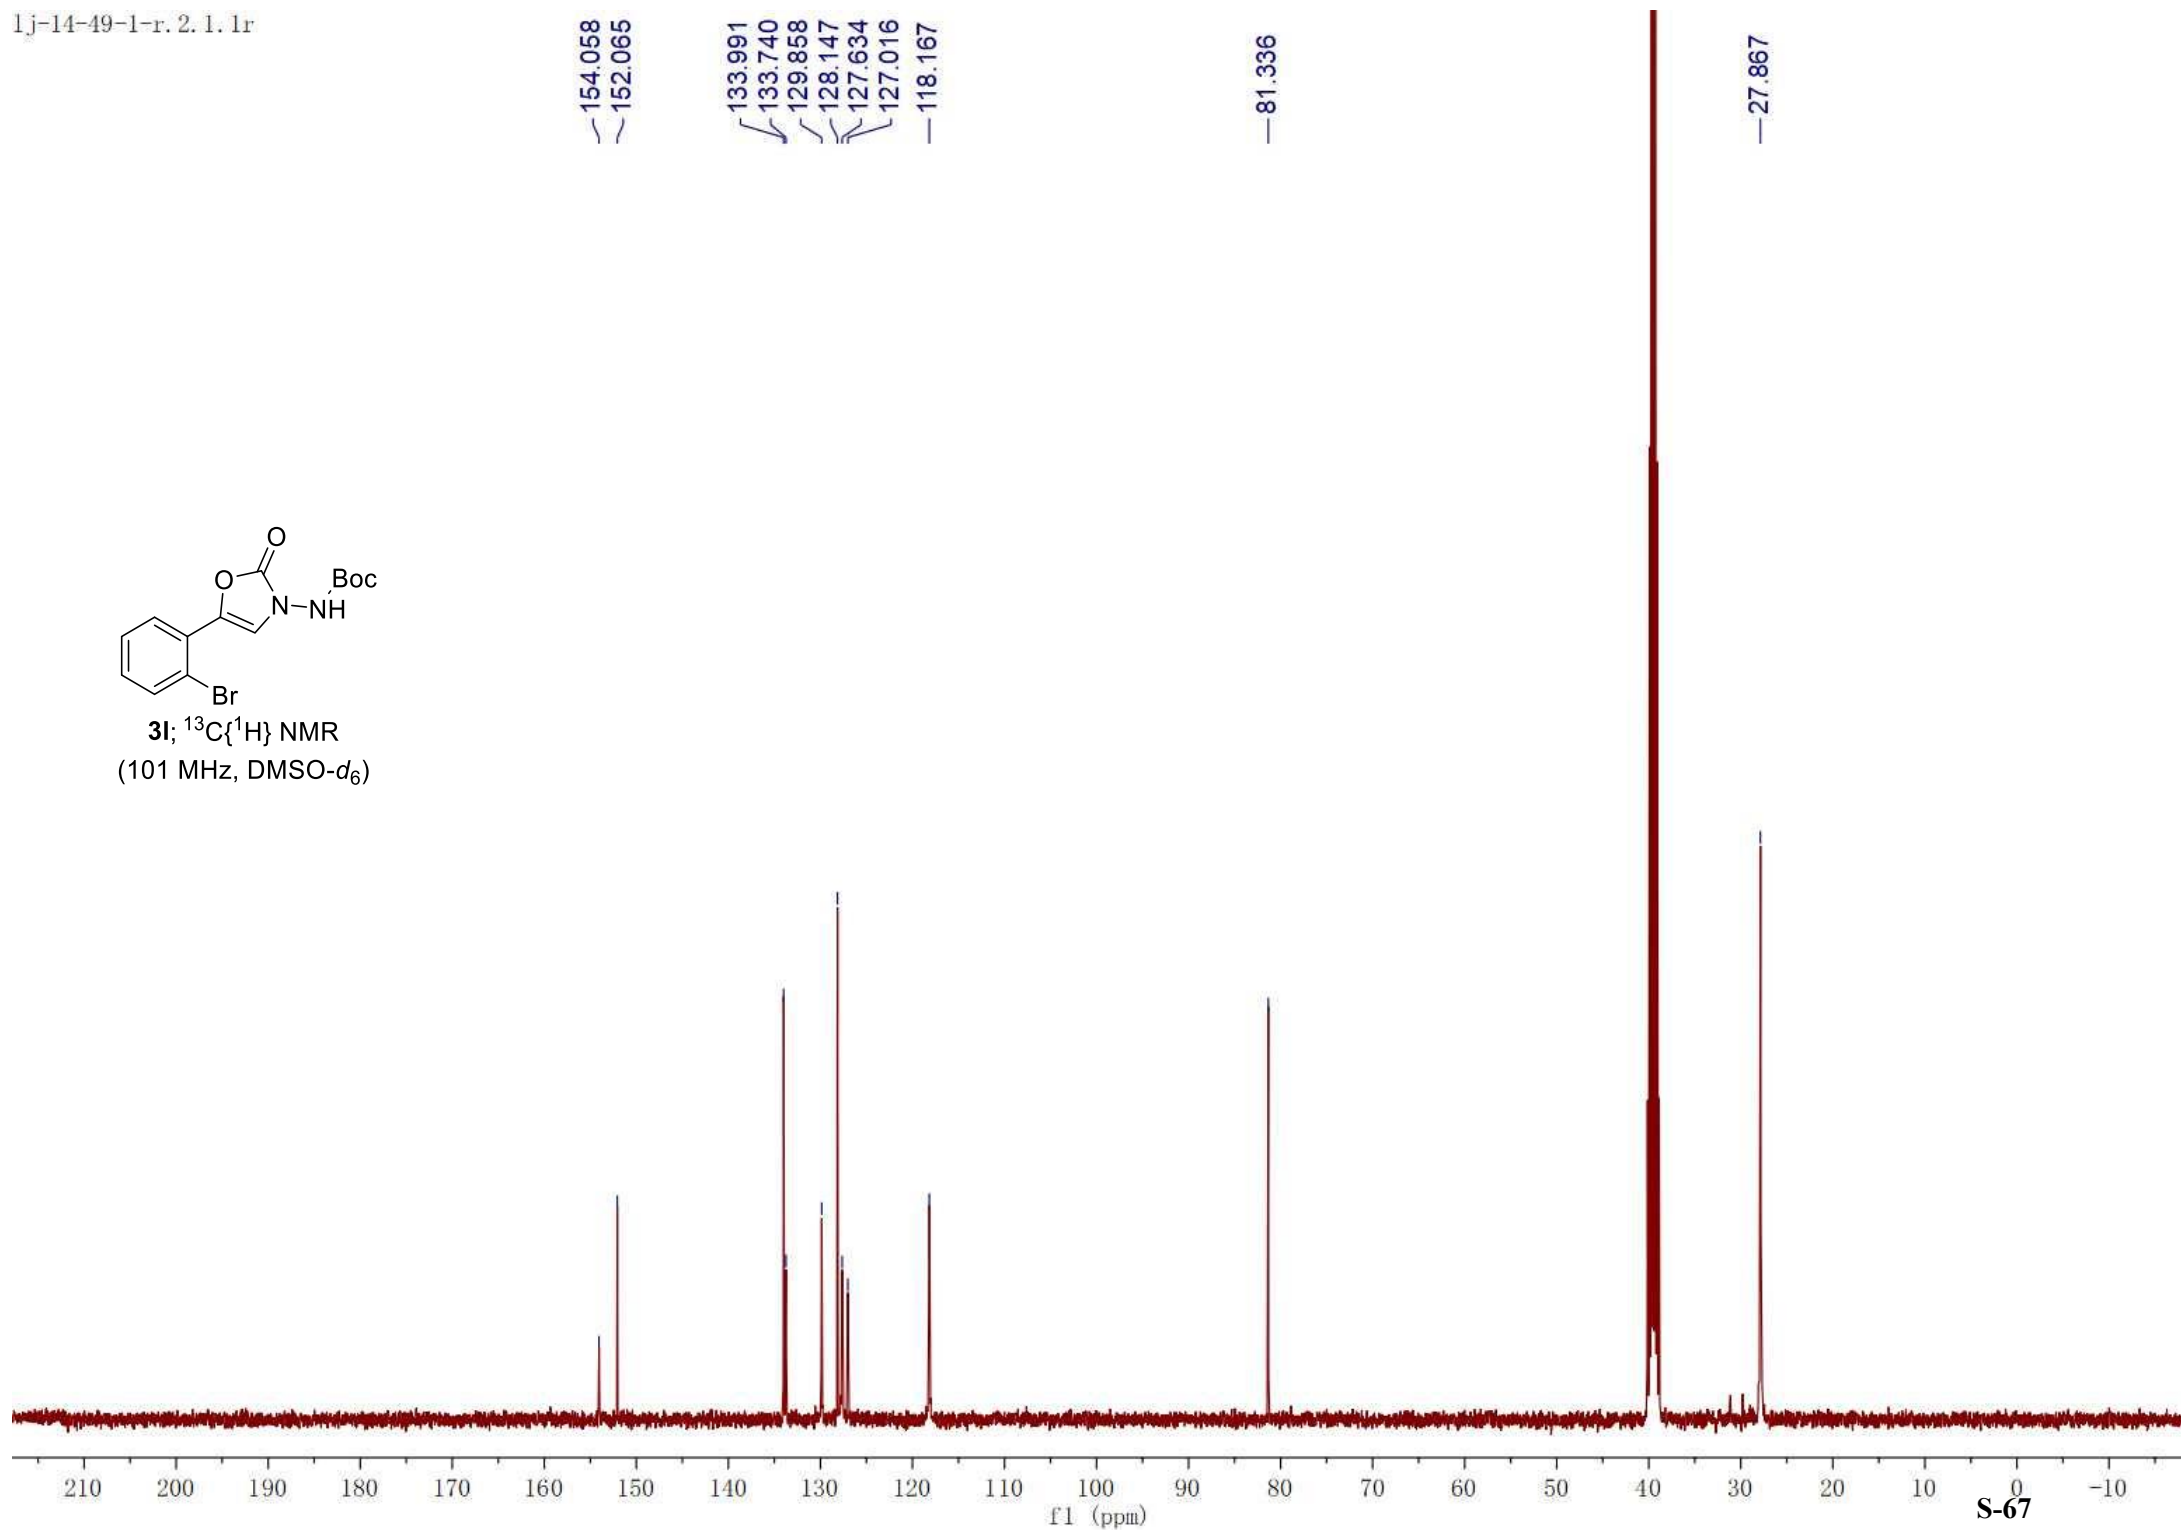

—10.377

—9.956

8.135

7.902

7.881

7.688

7.667

1.451

1.363

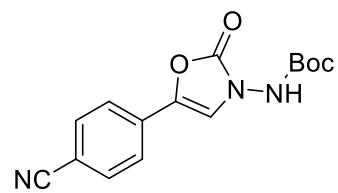

**3m**;  $^1\text{H}$  NMR  
(400 MHz,  $\text{DMSO}-d_6$ )

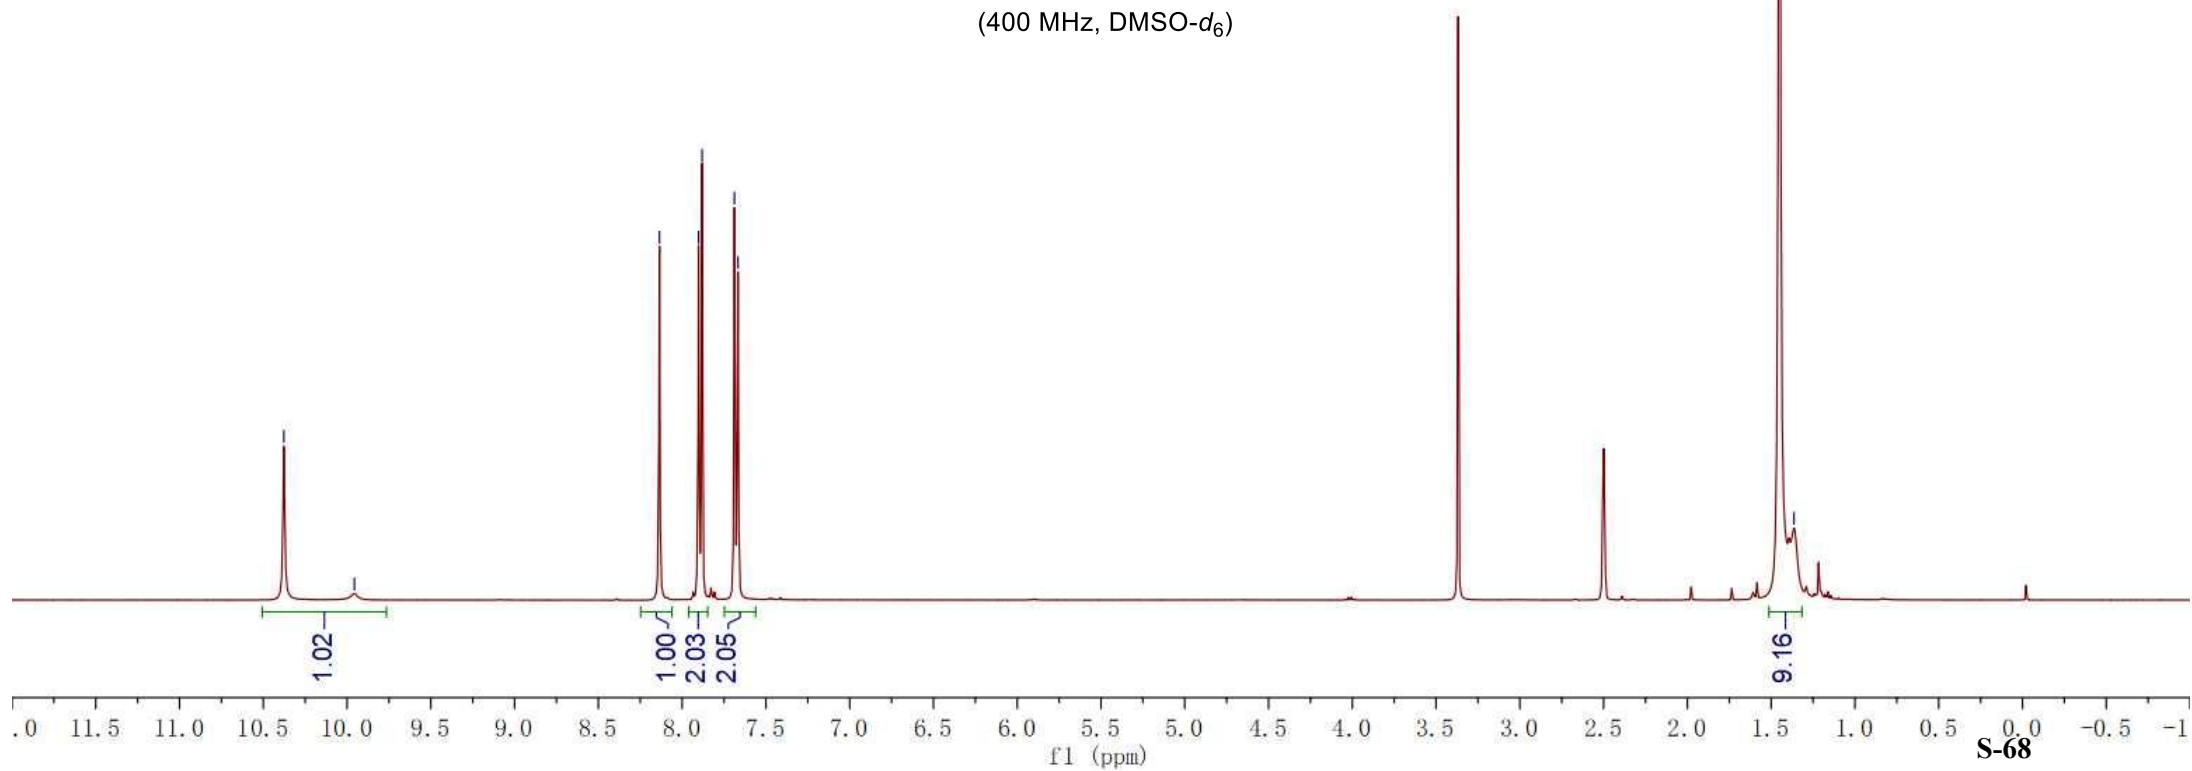



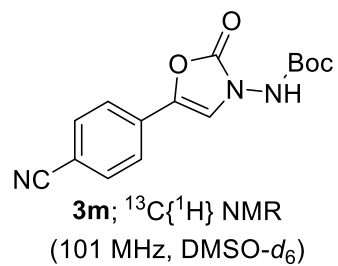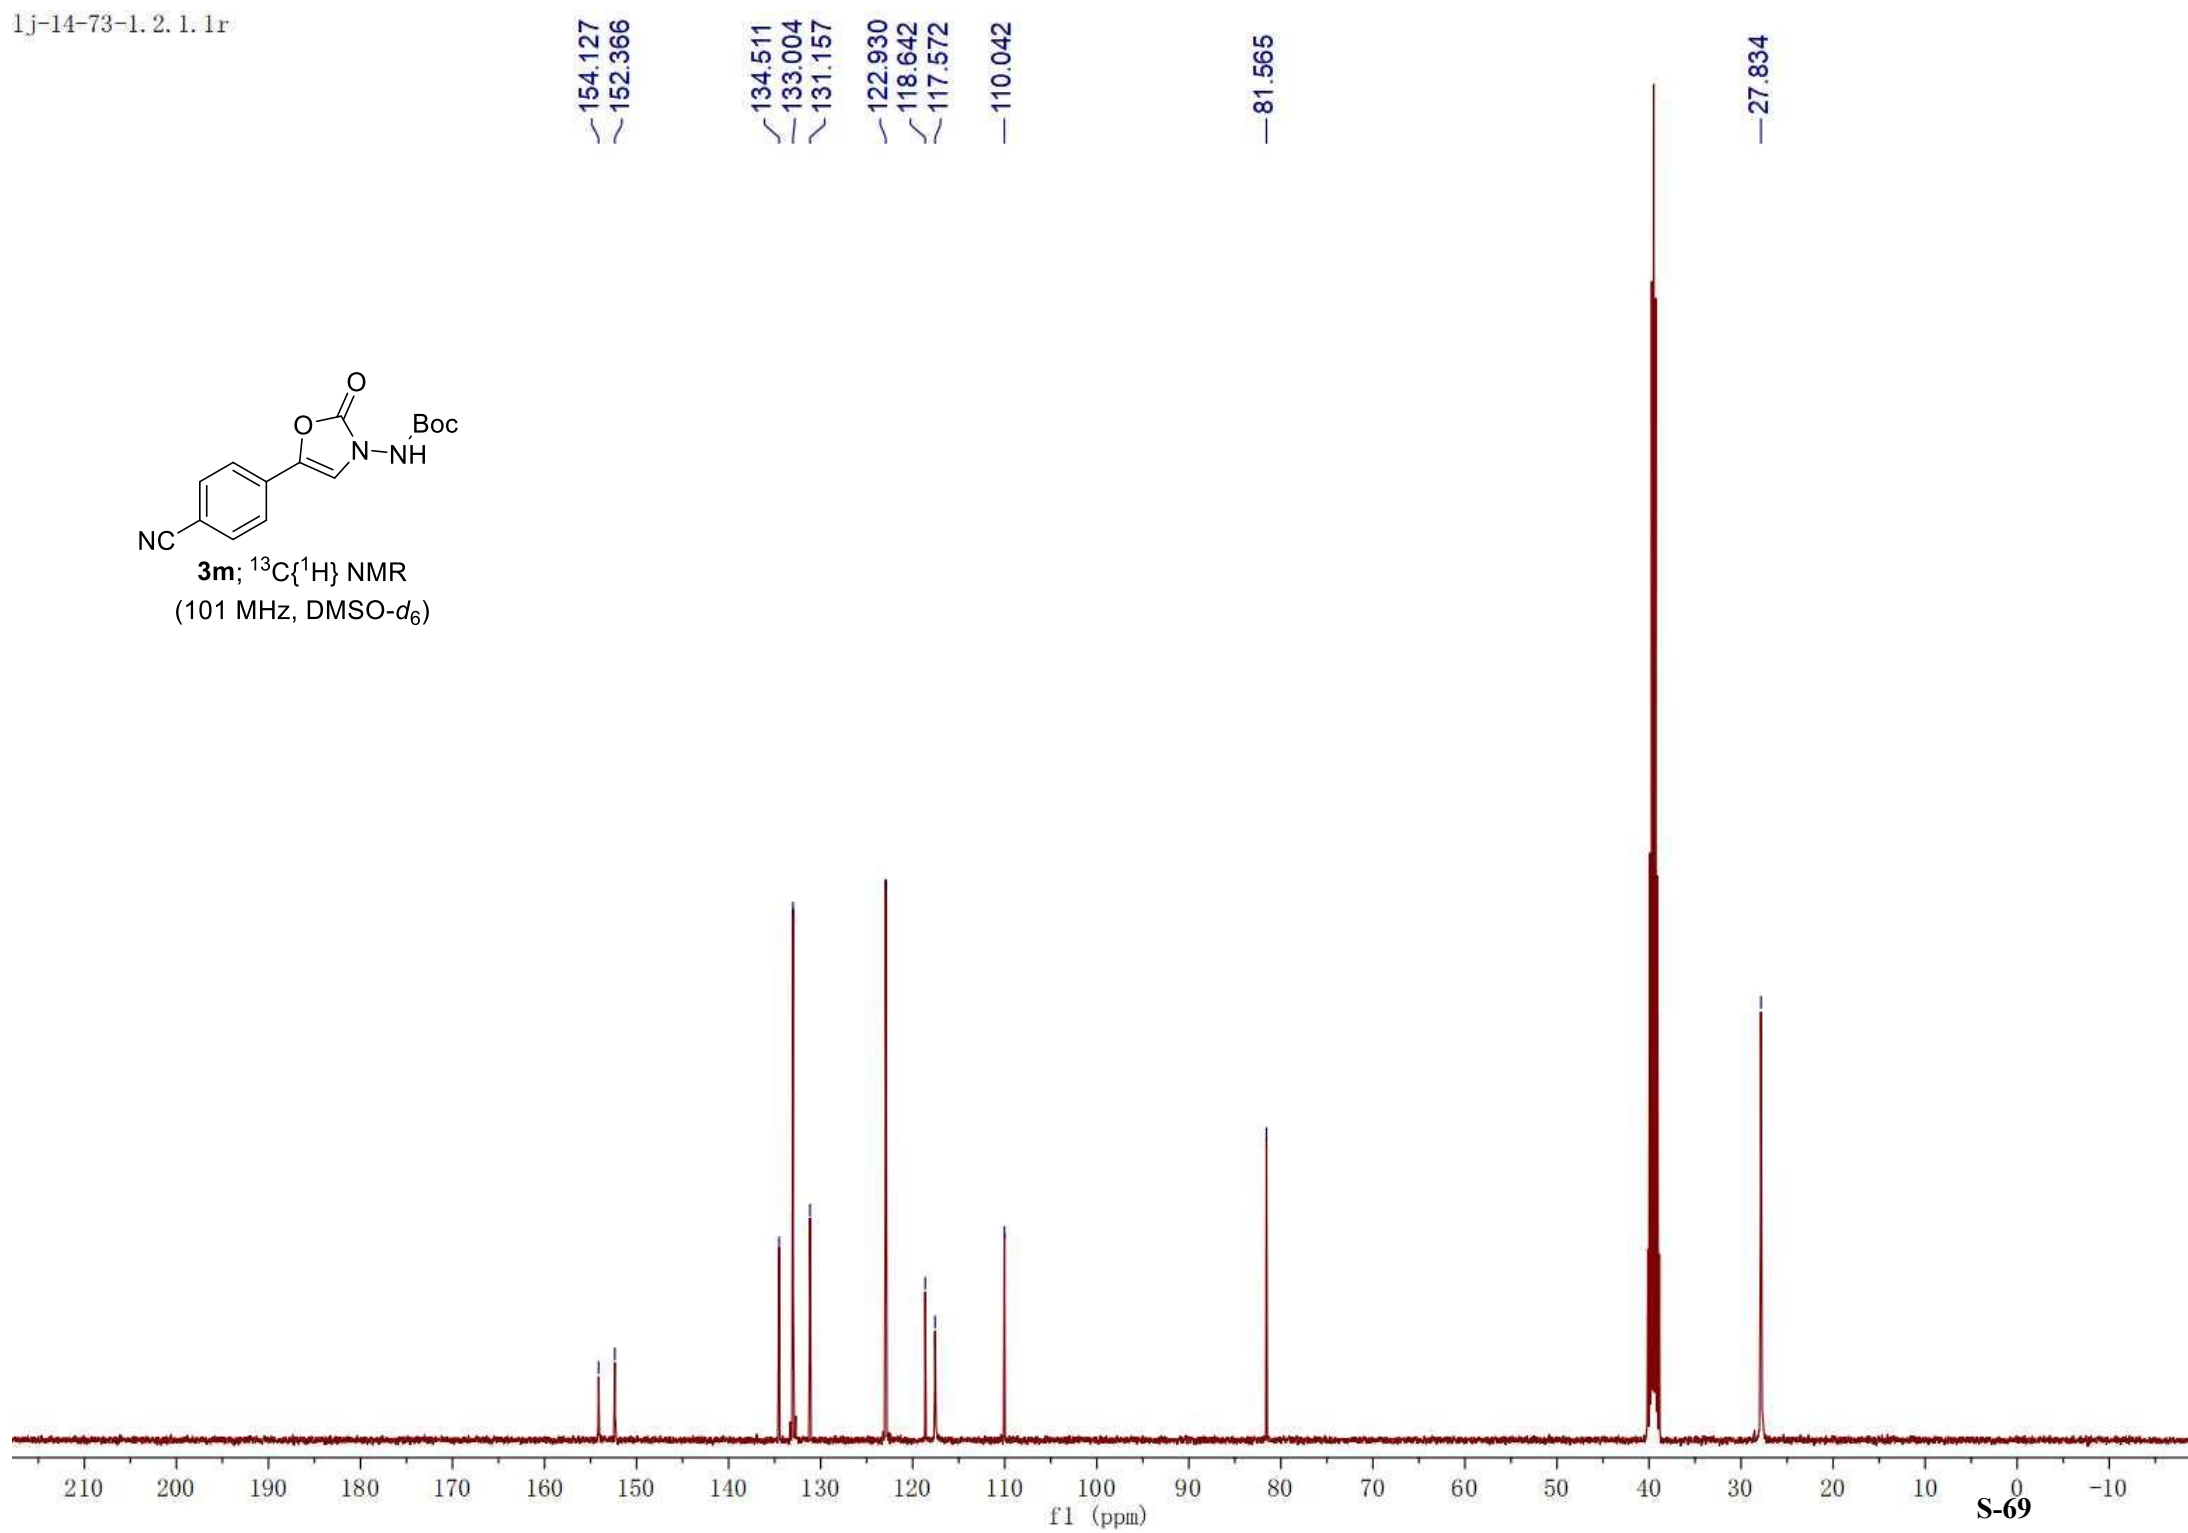

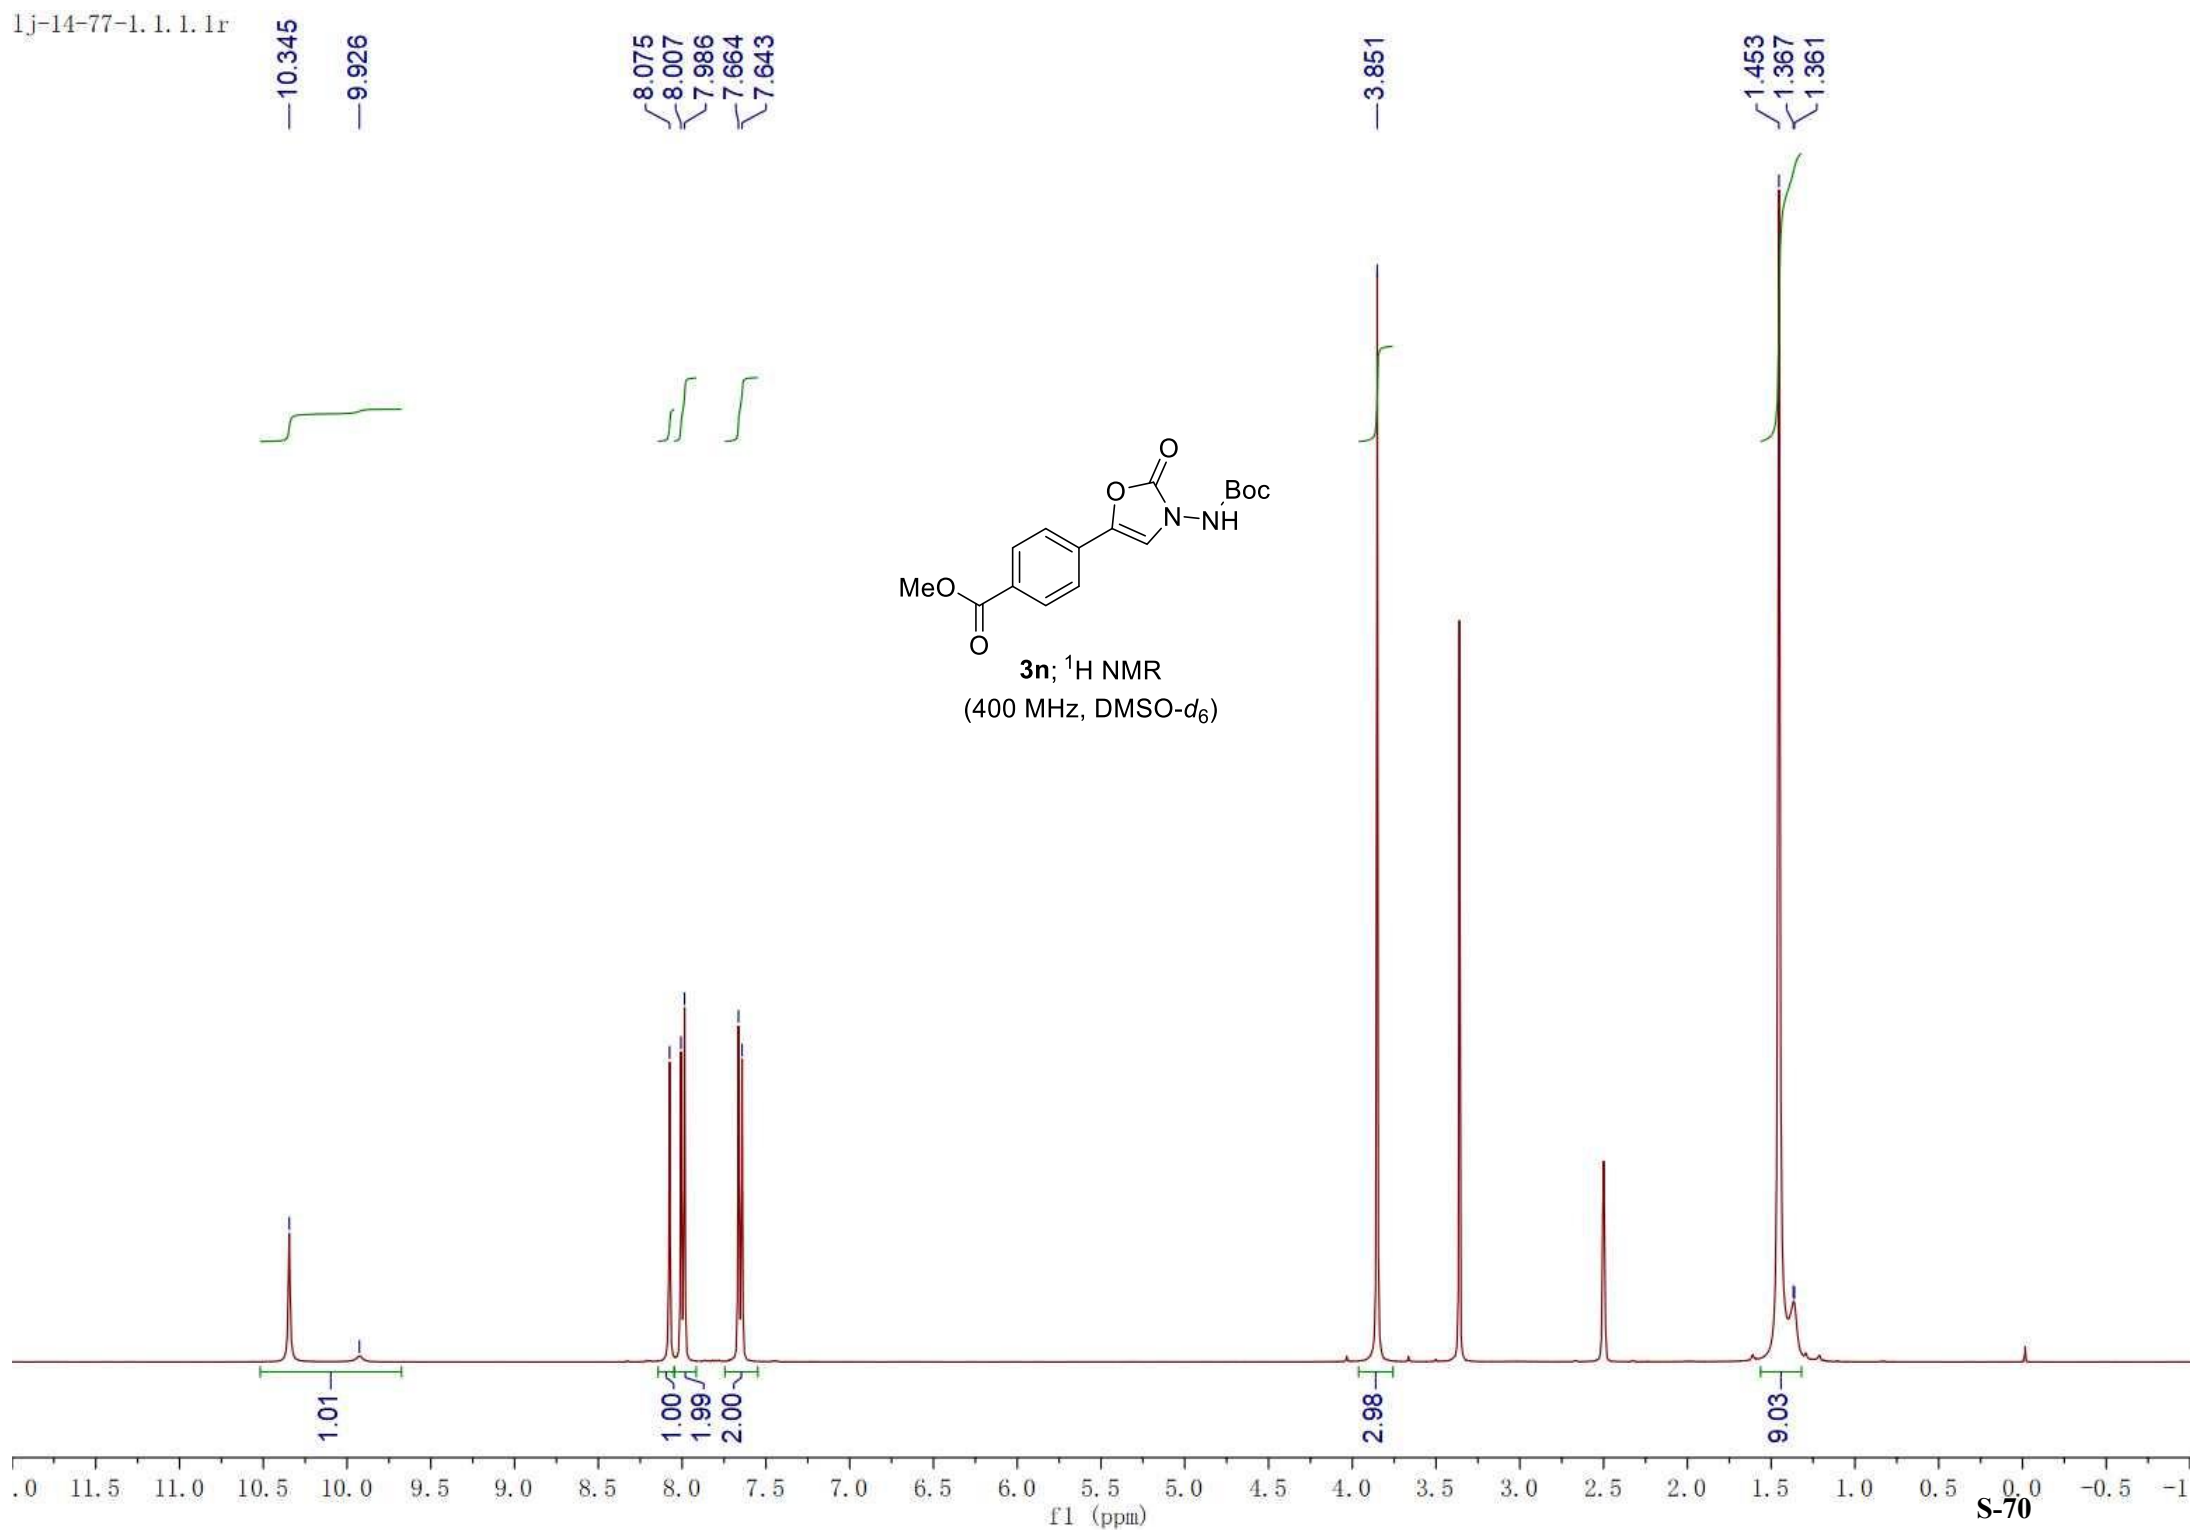

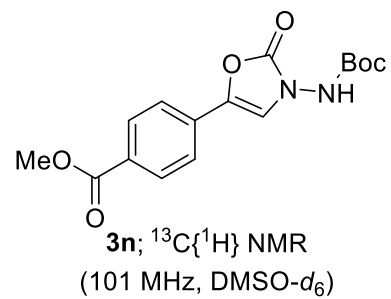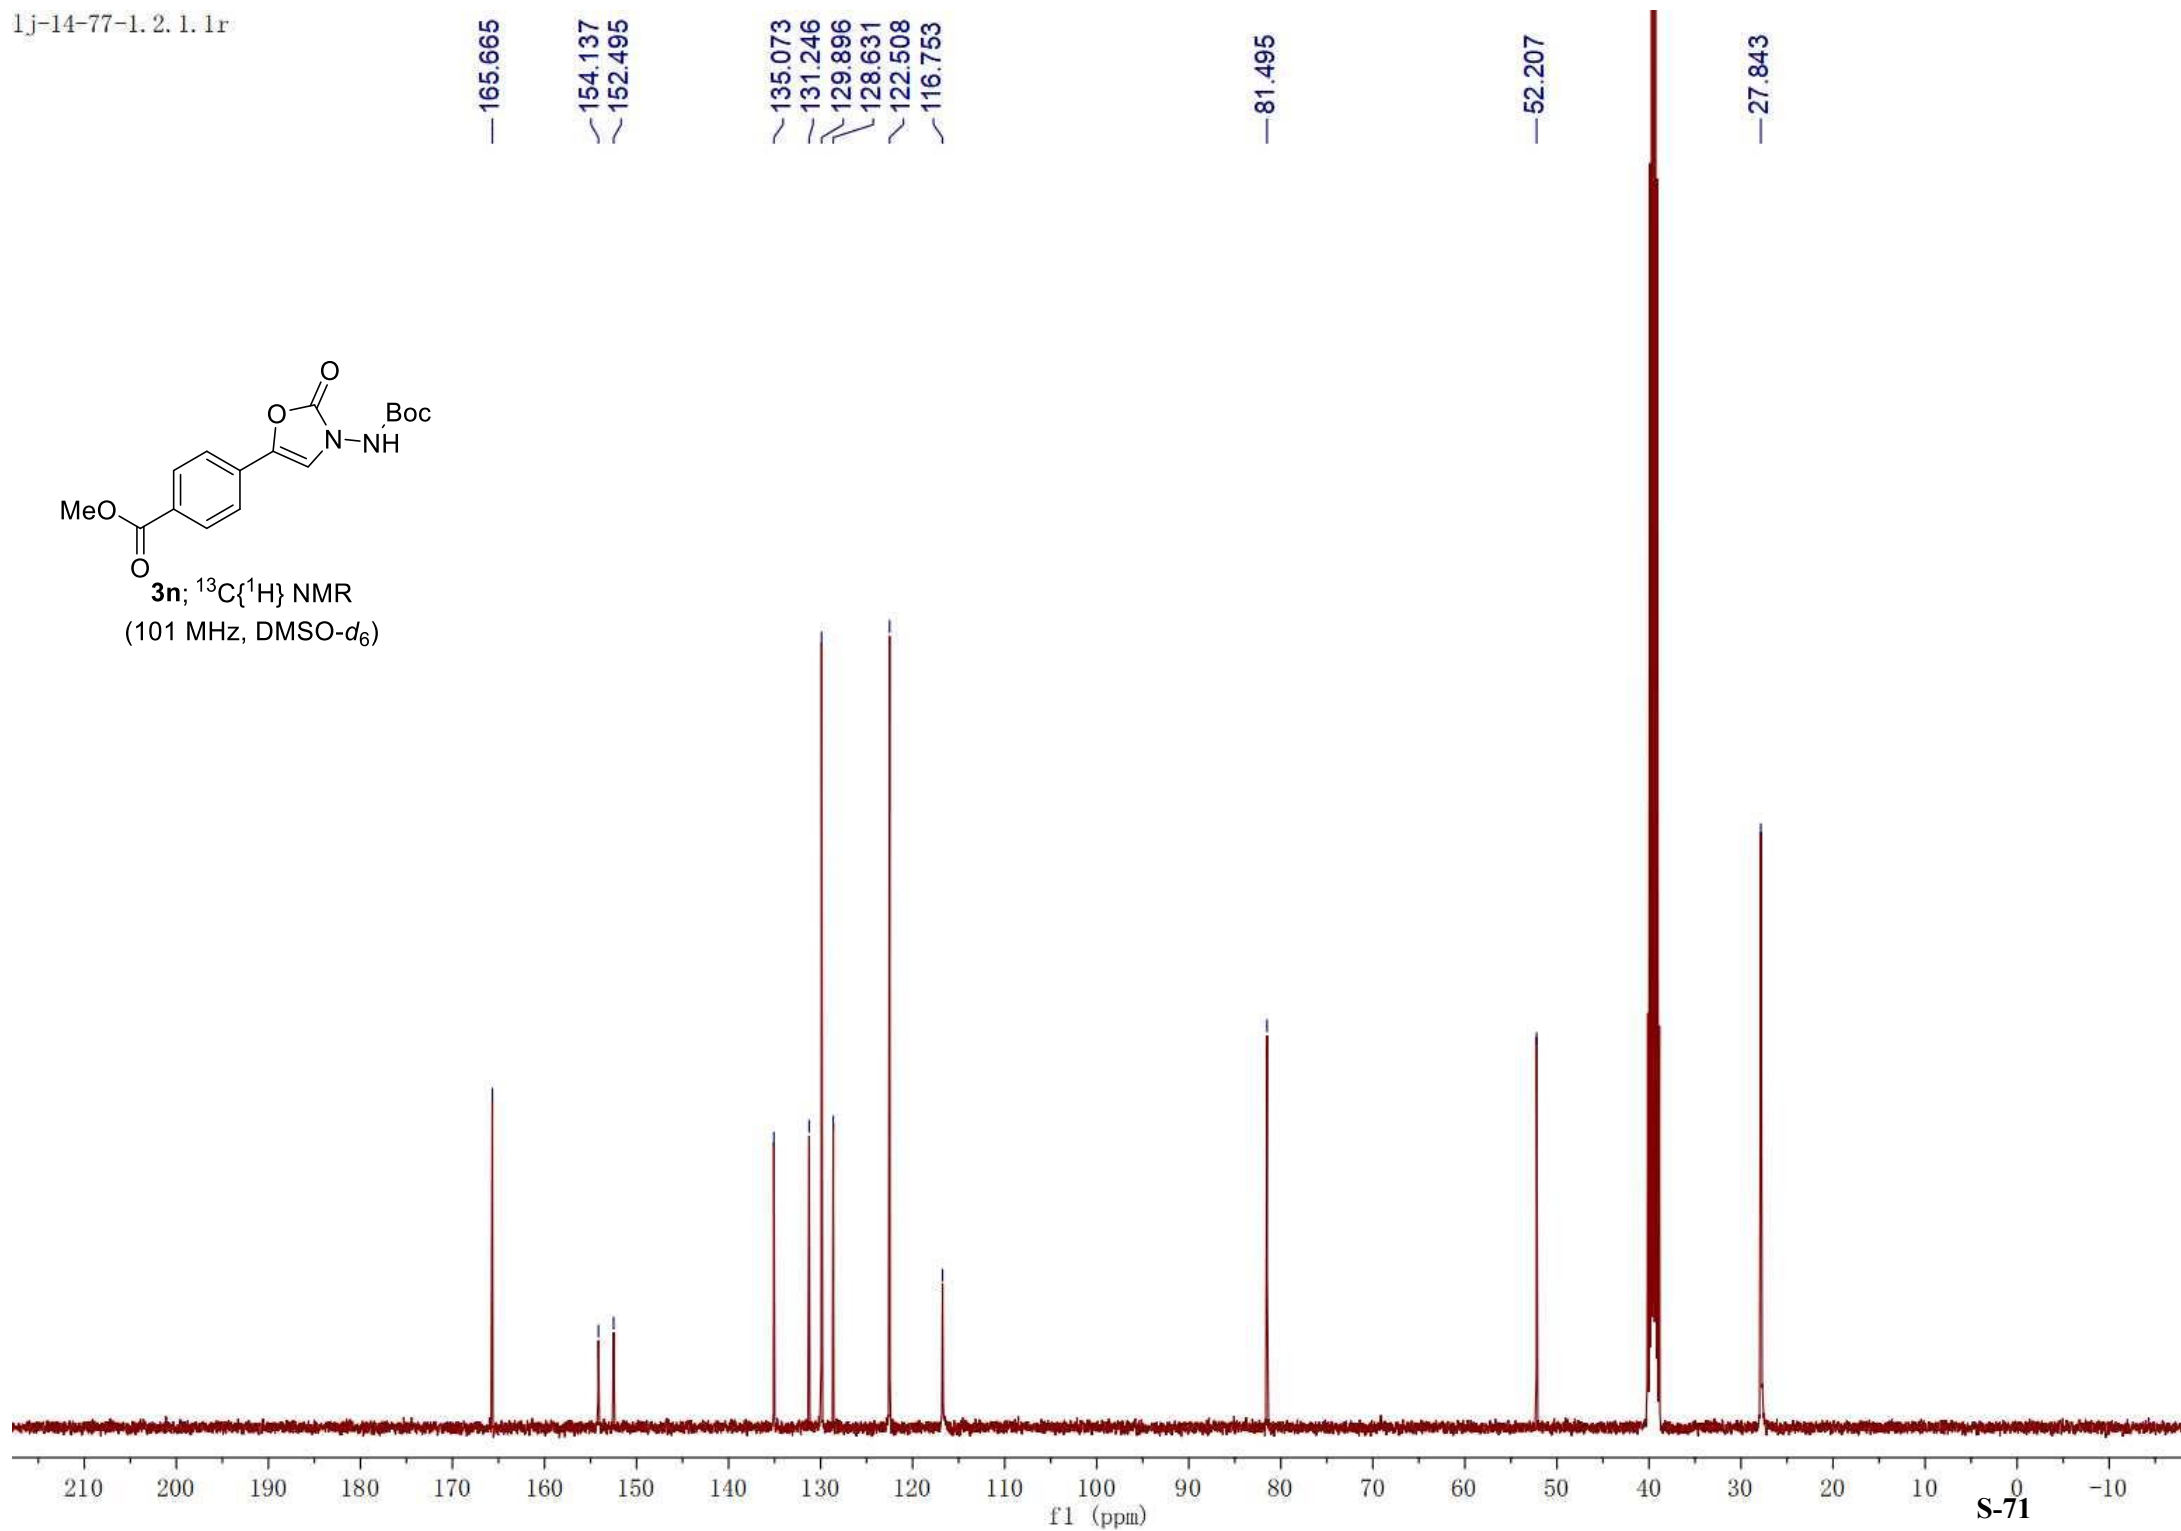

8.130  
7.968  
7.947  
7.736  
7.716

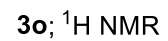

(400 MHz, DMSO-*d*<sub>6</sub>)

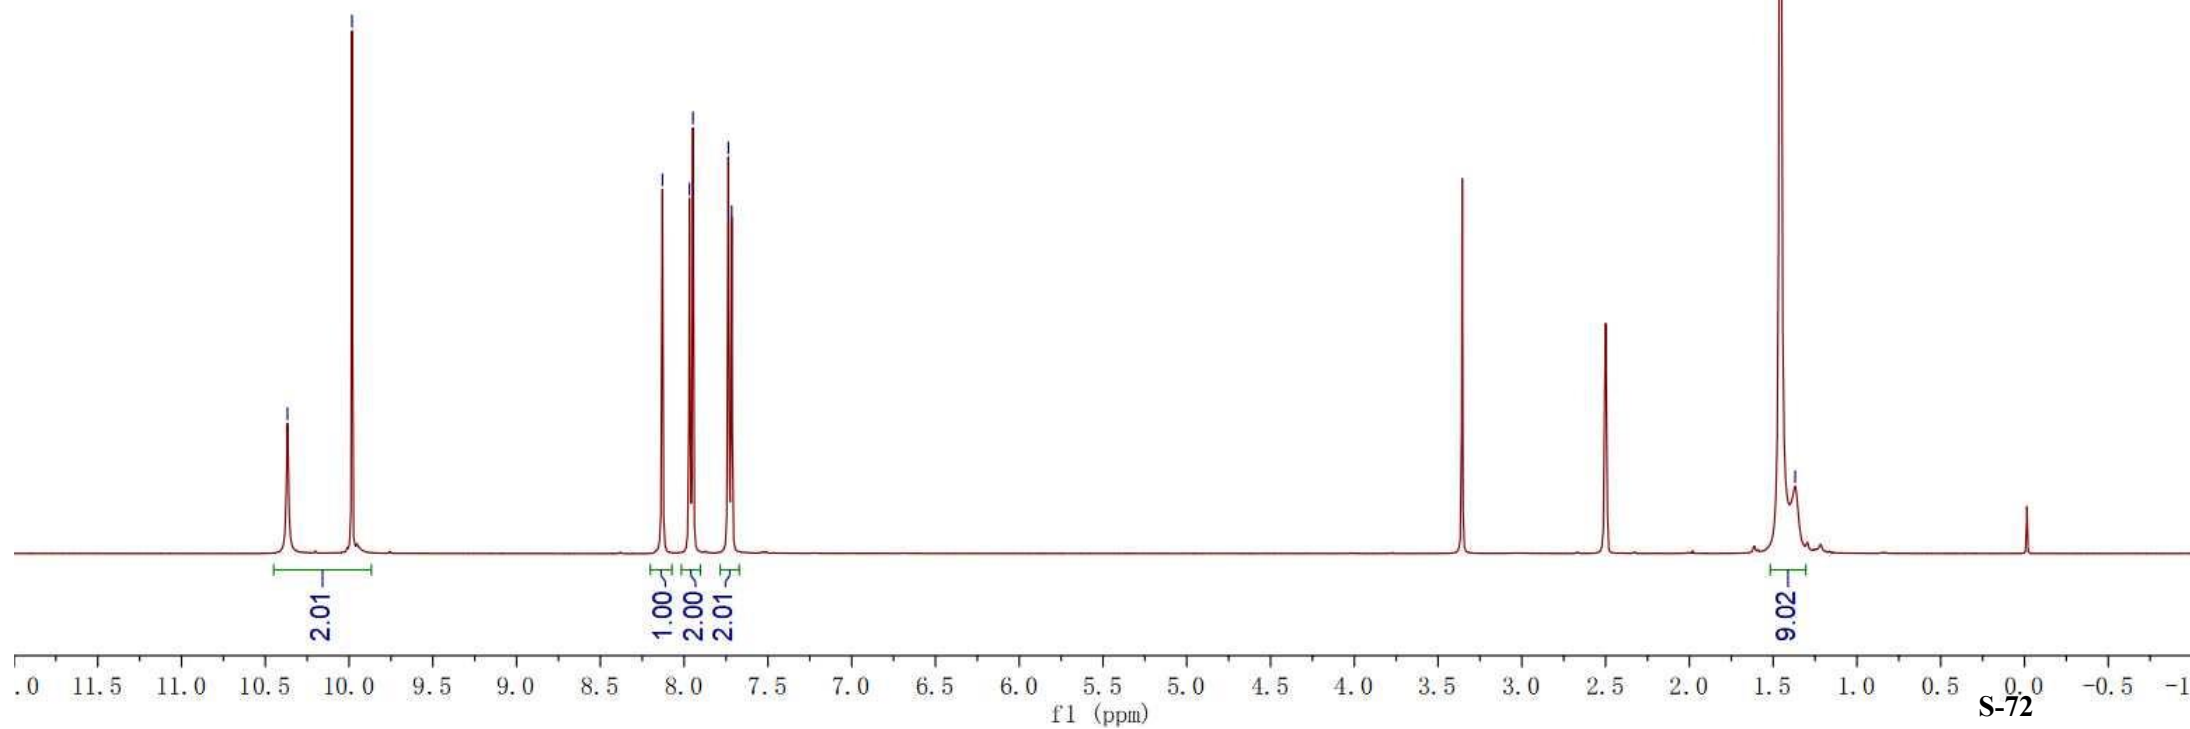

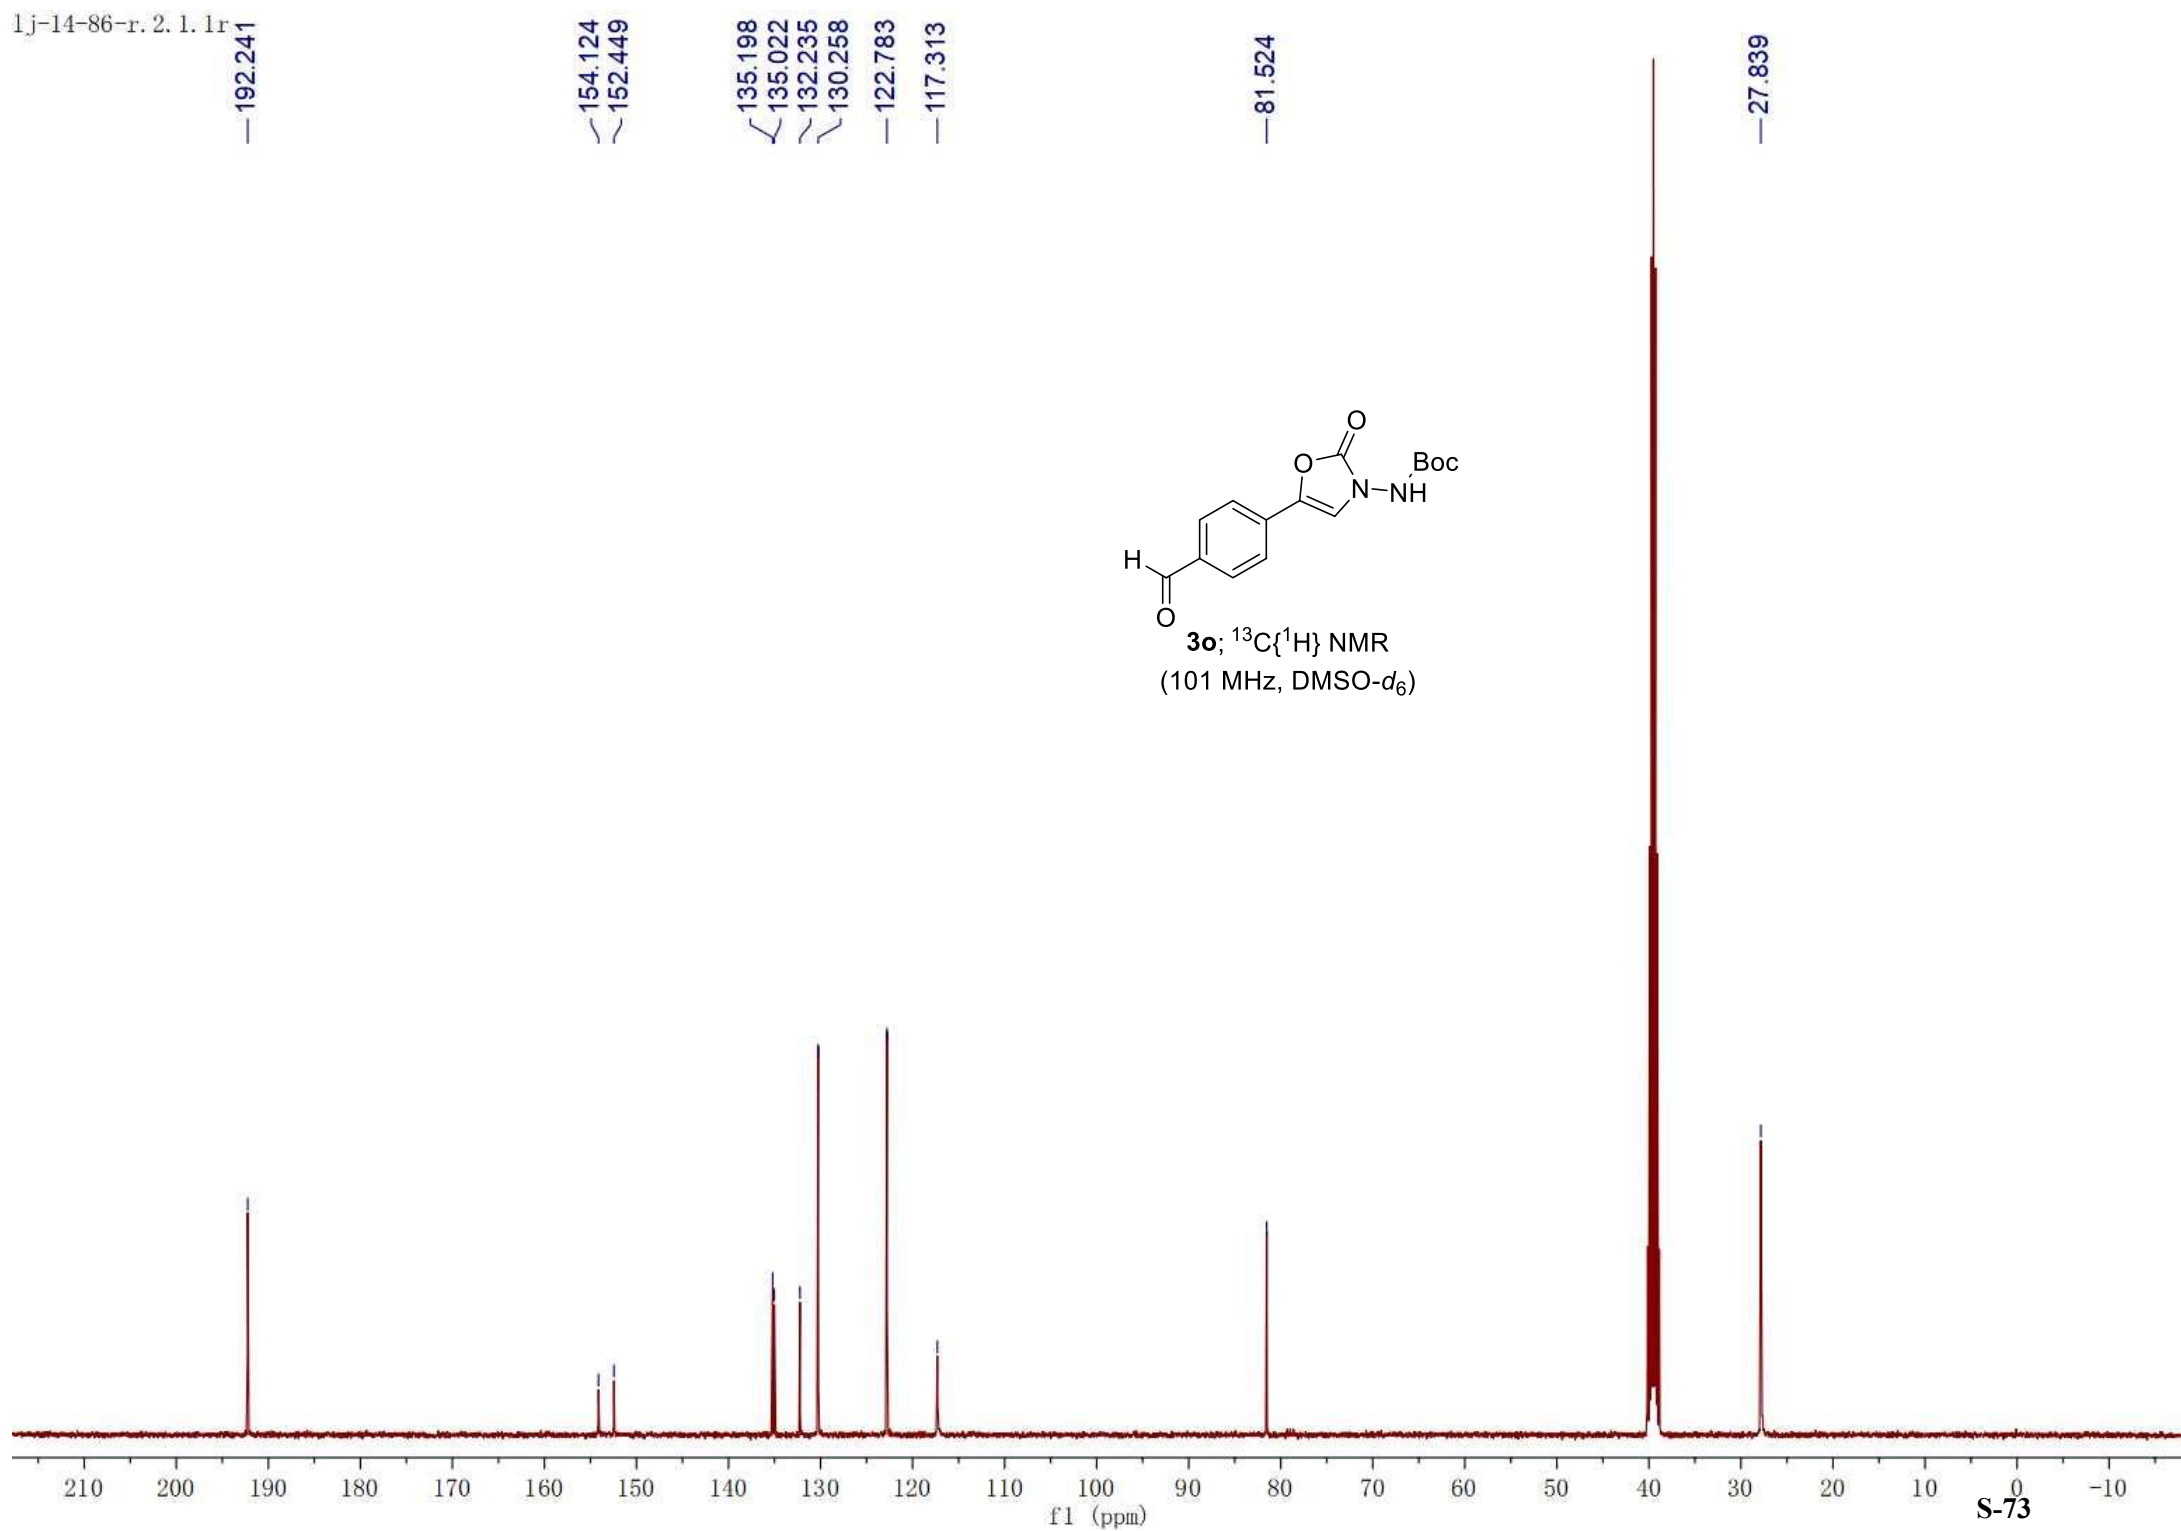

— 10.355

— 9.940

8.097

7.803

7.782

7.734

7.713

1.454

1.360

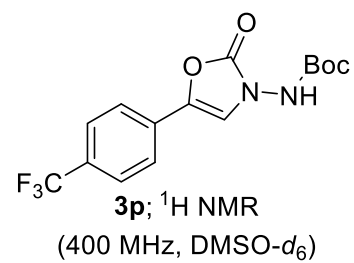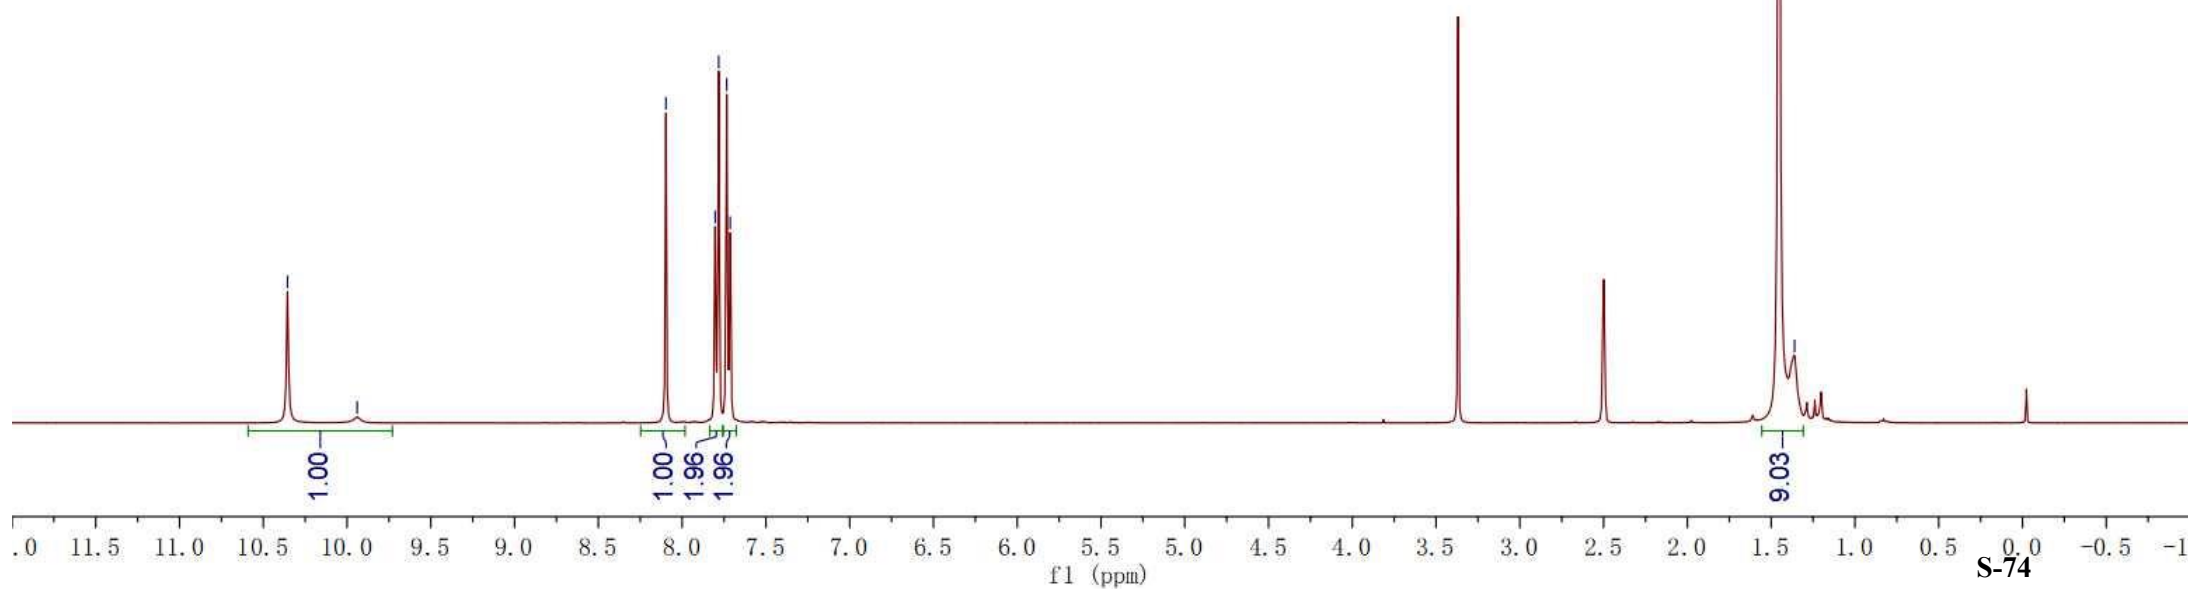

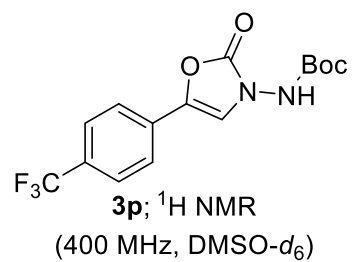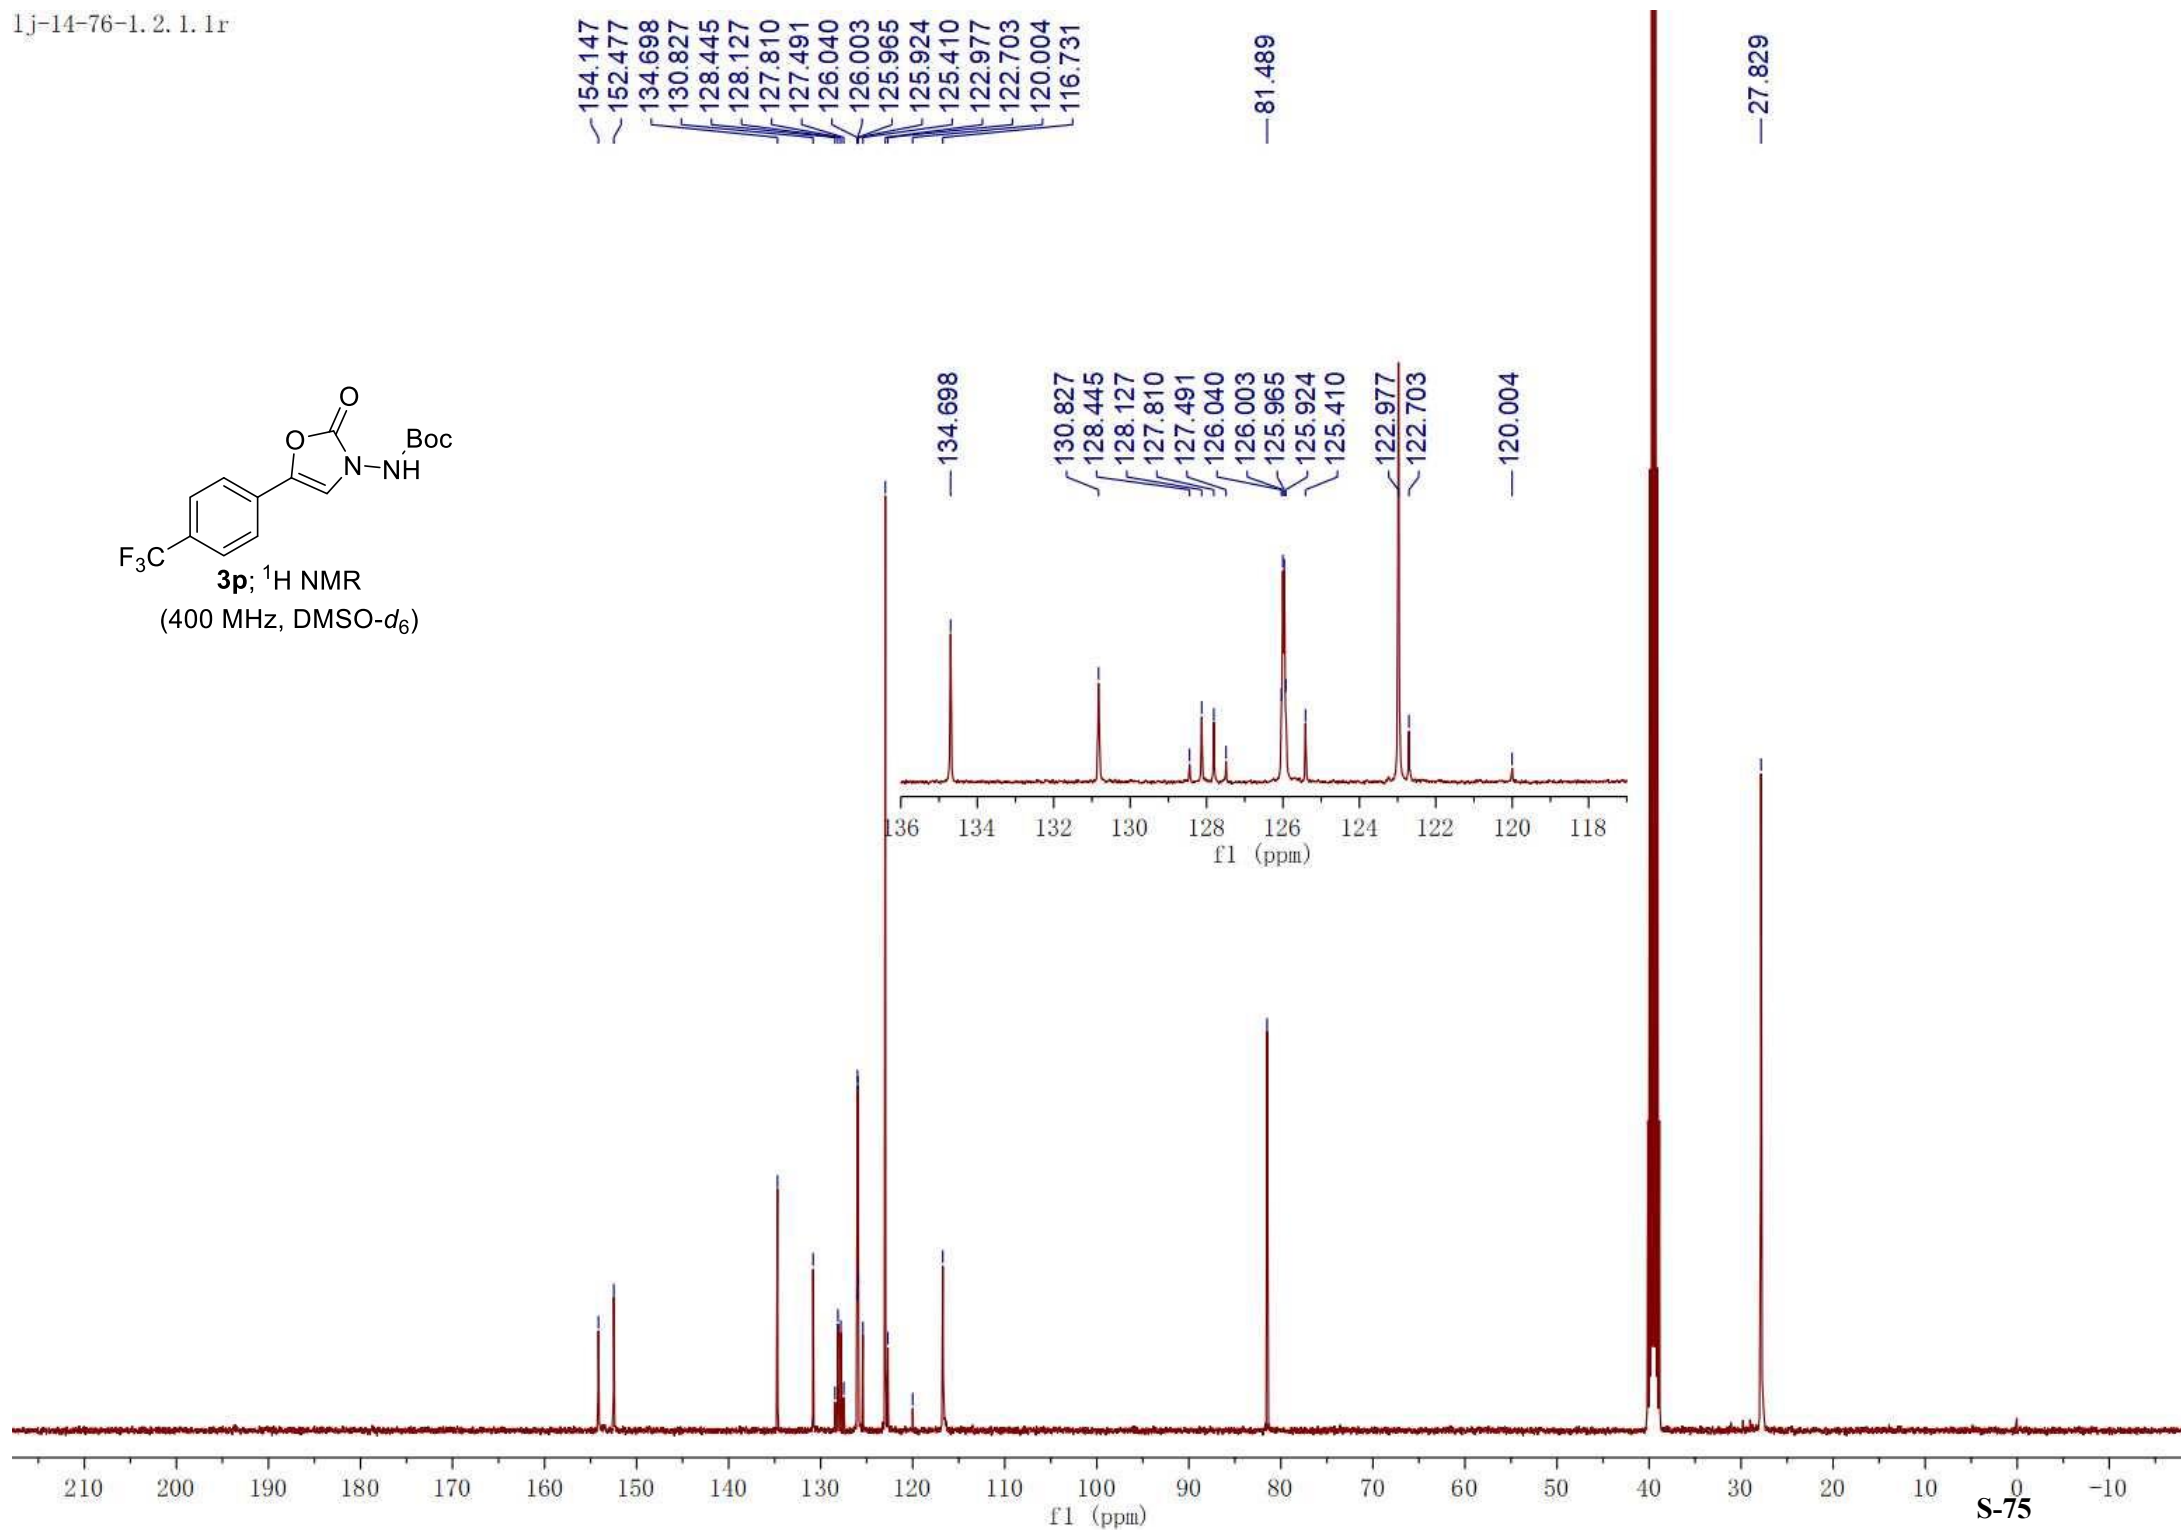

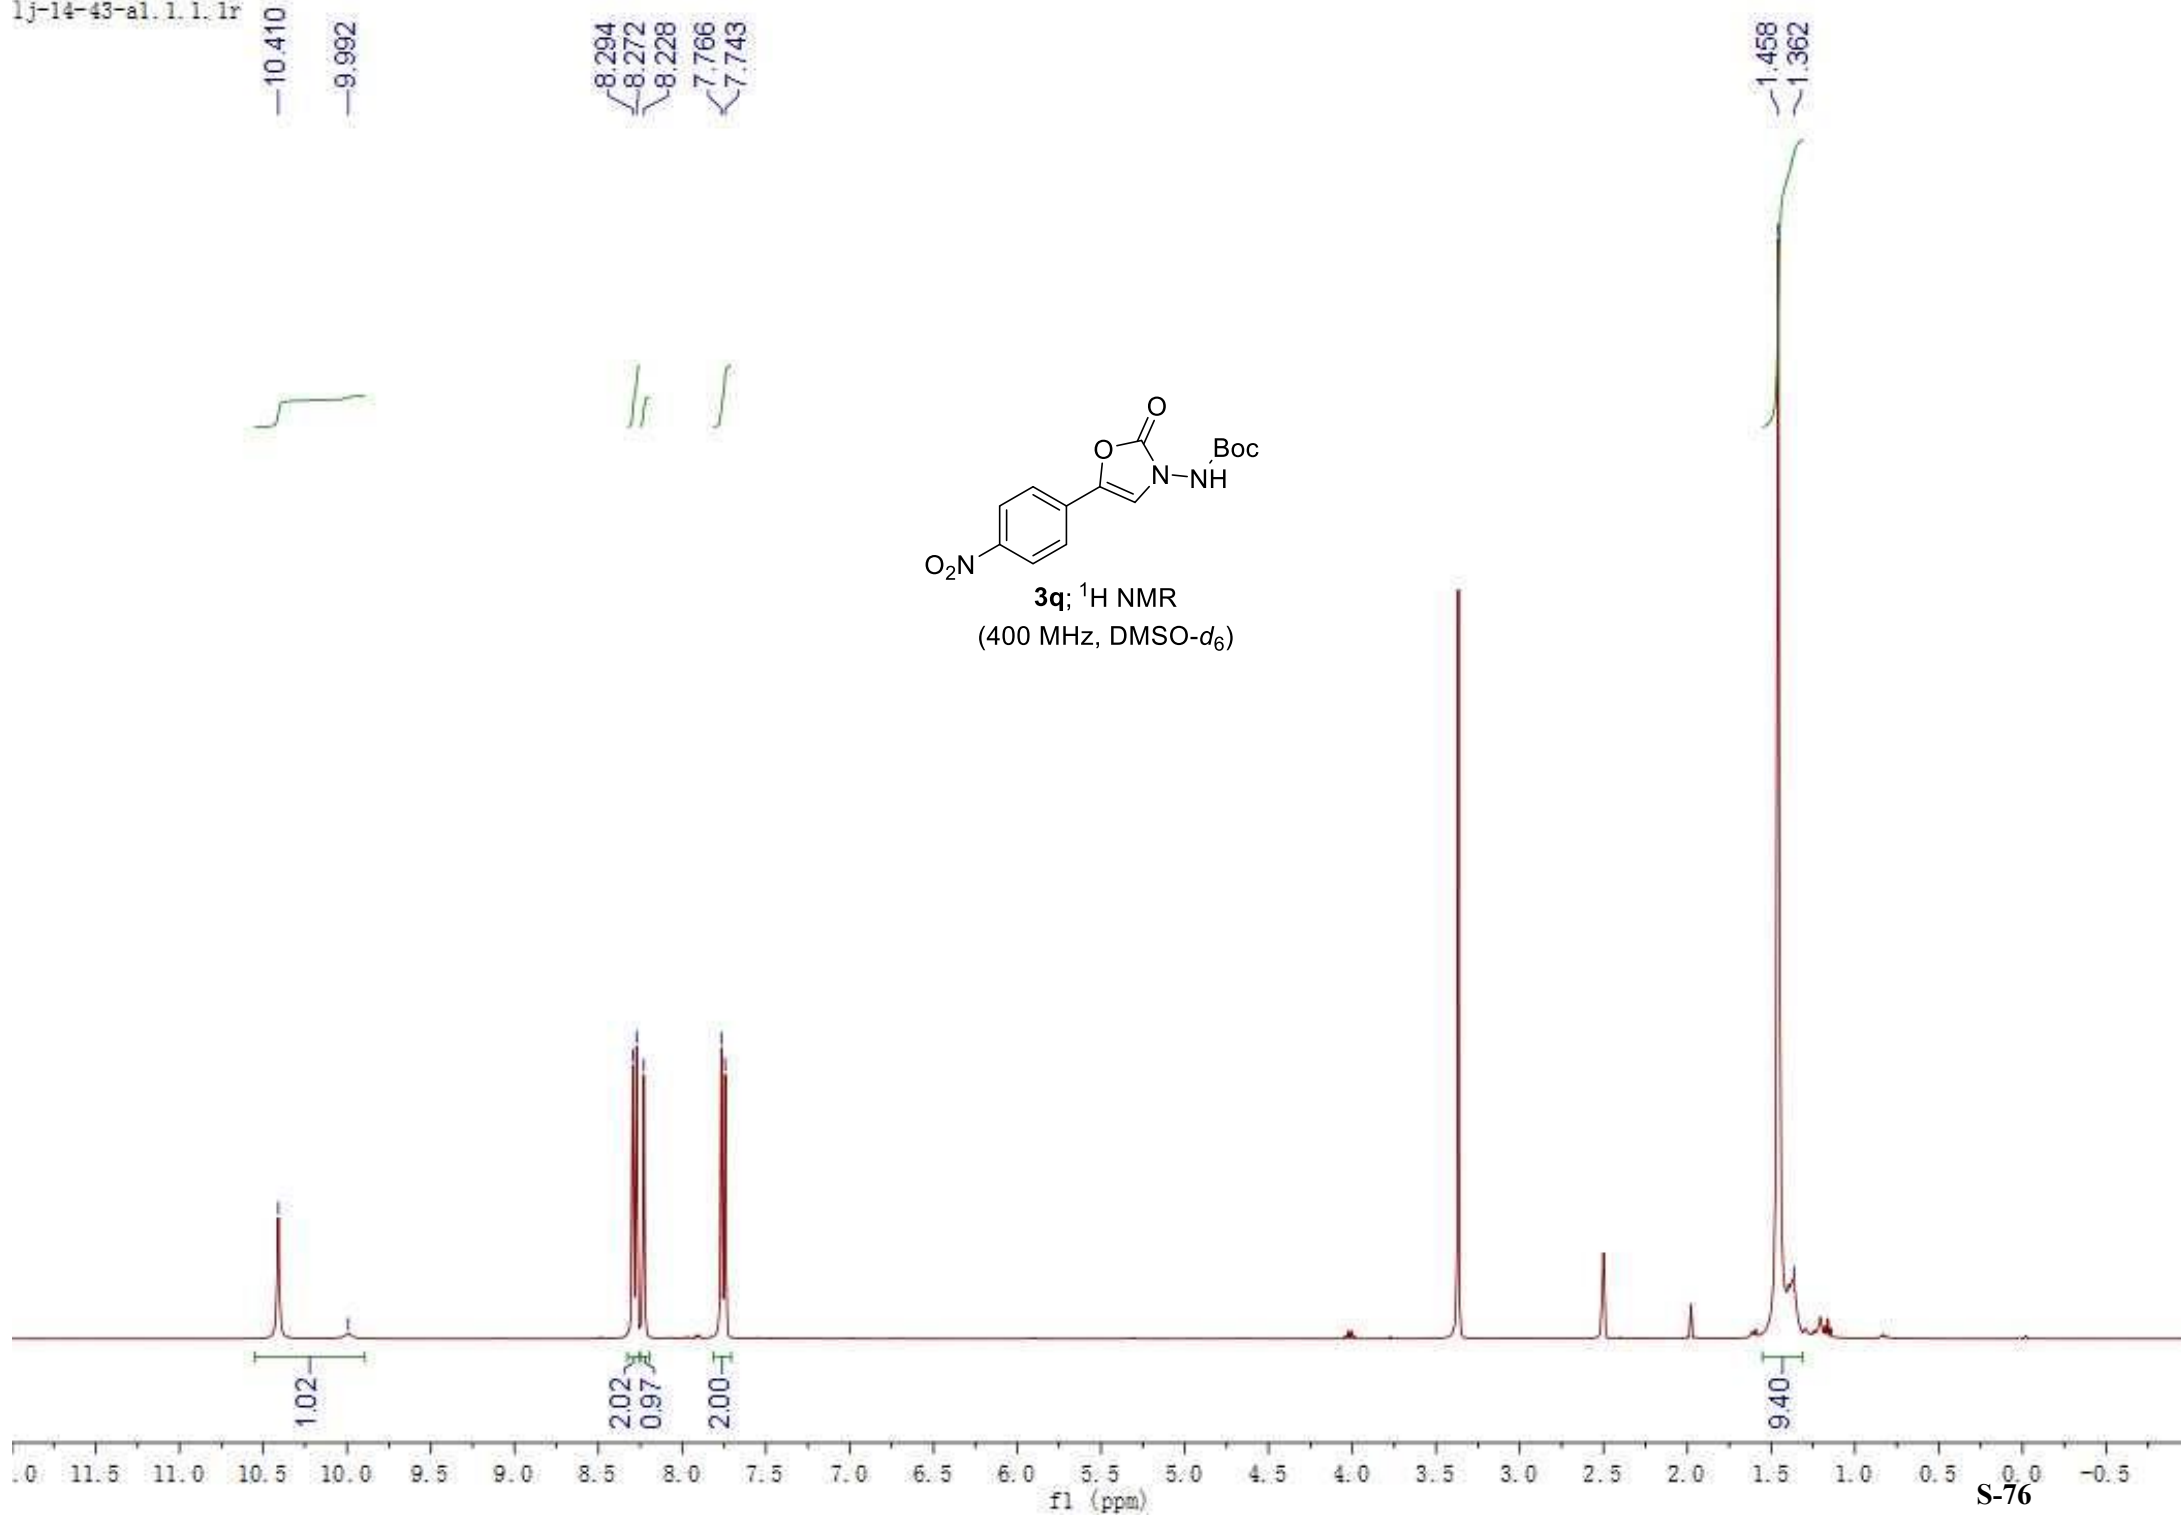



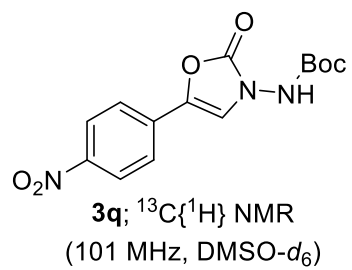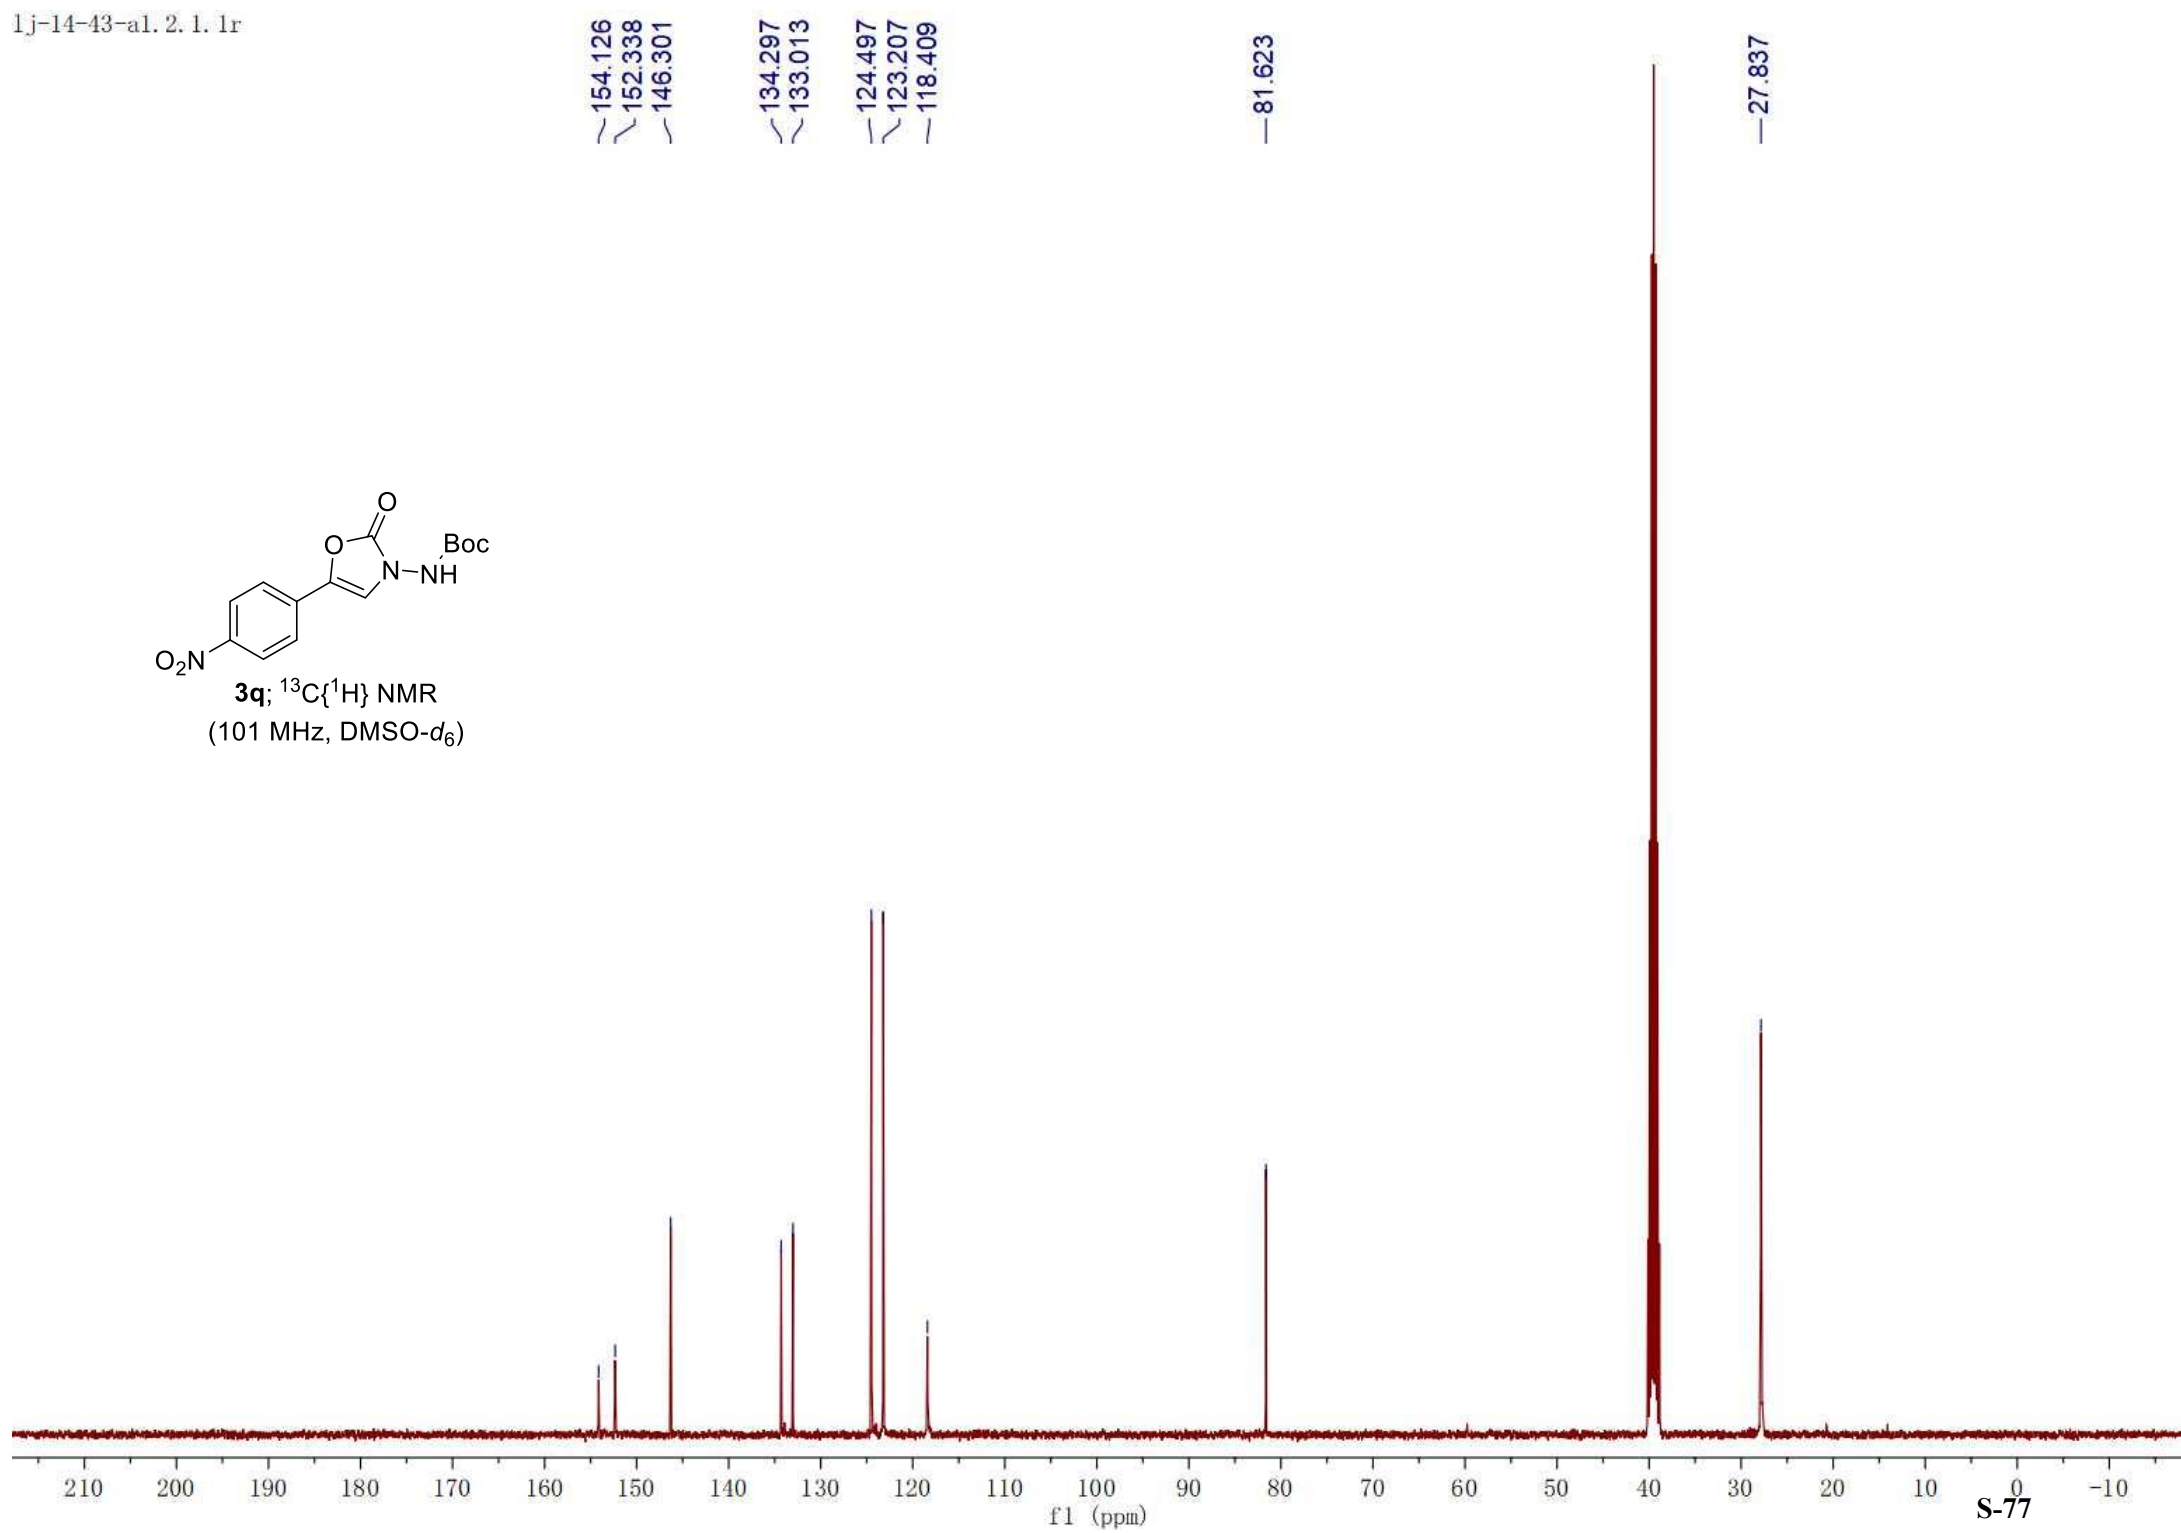

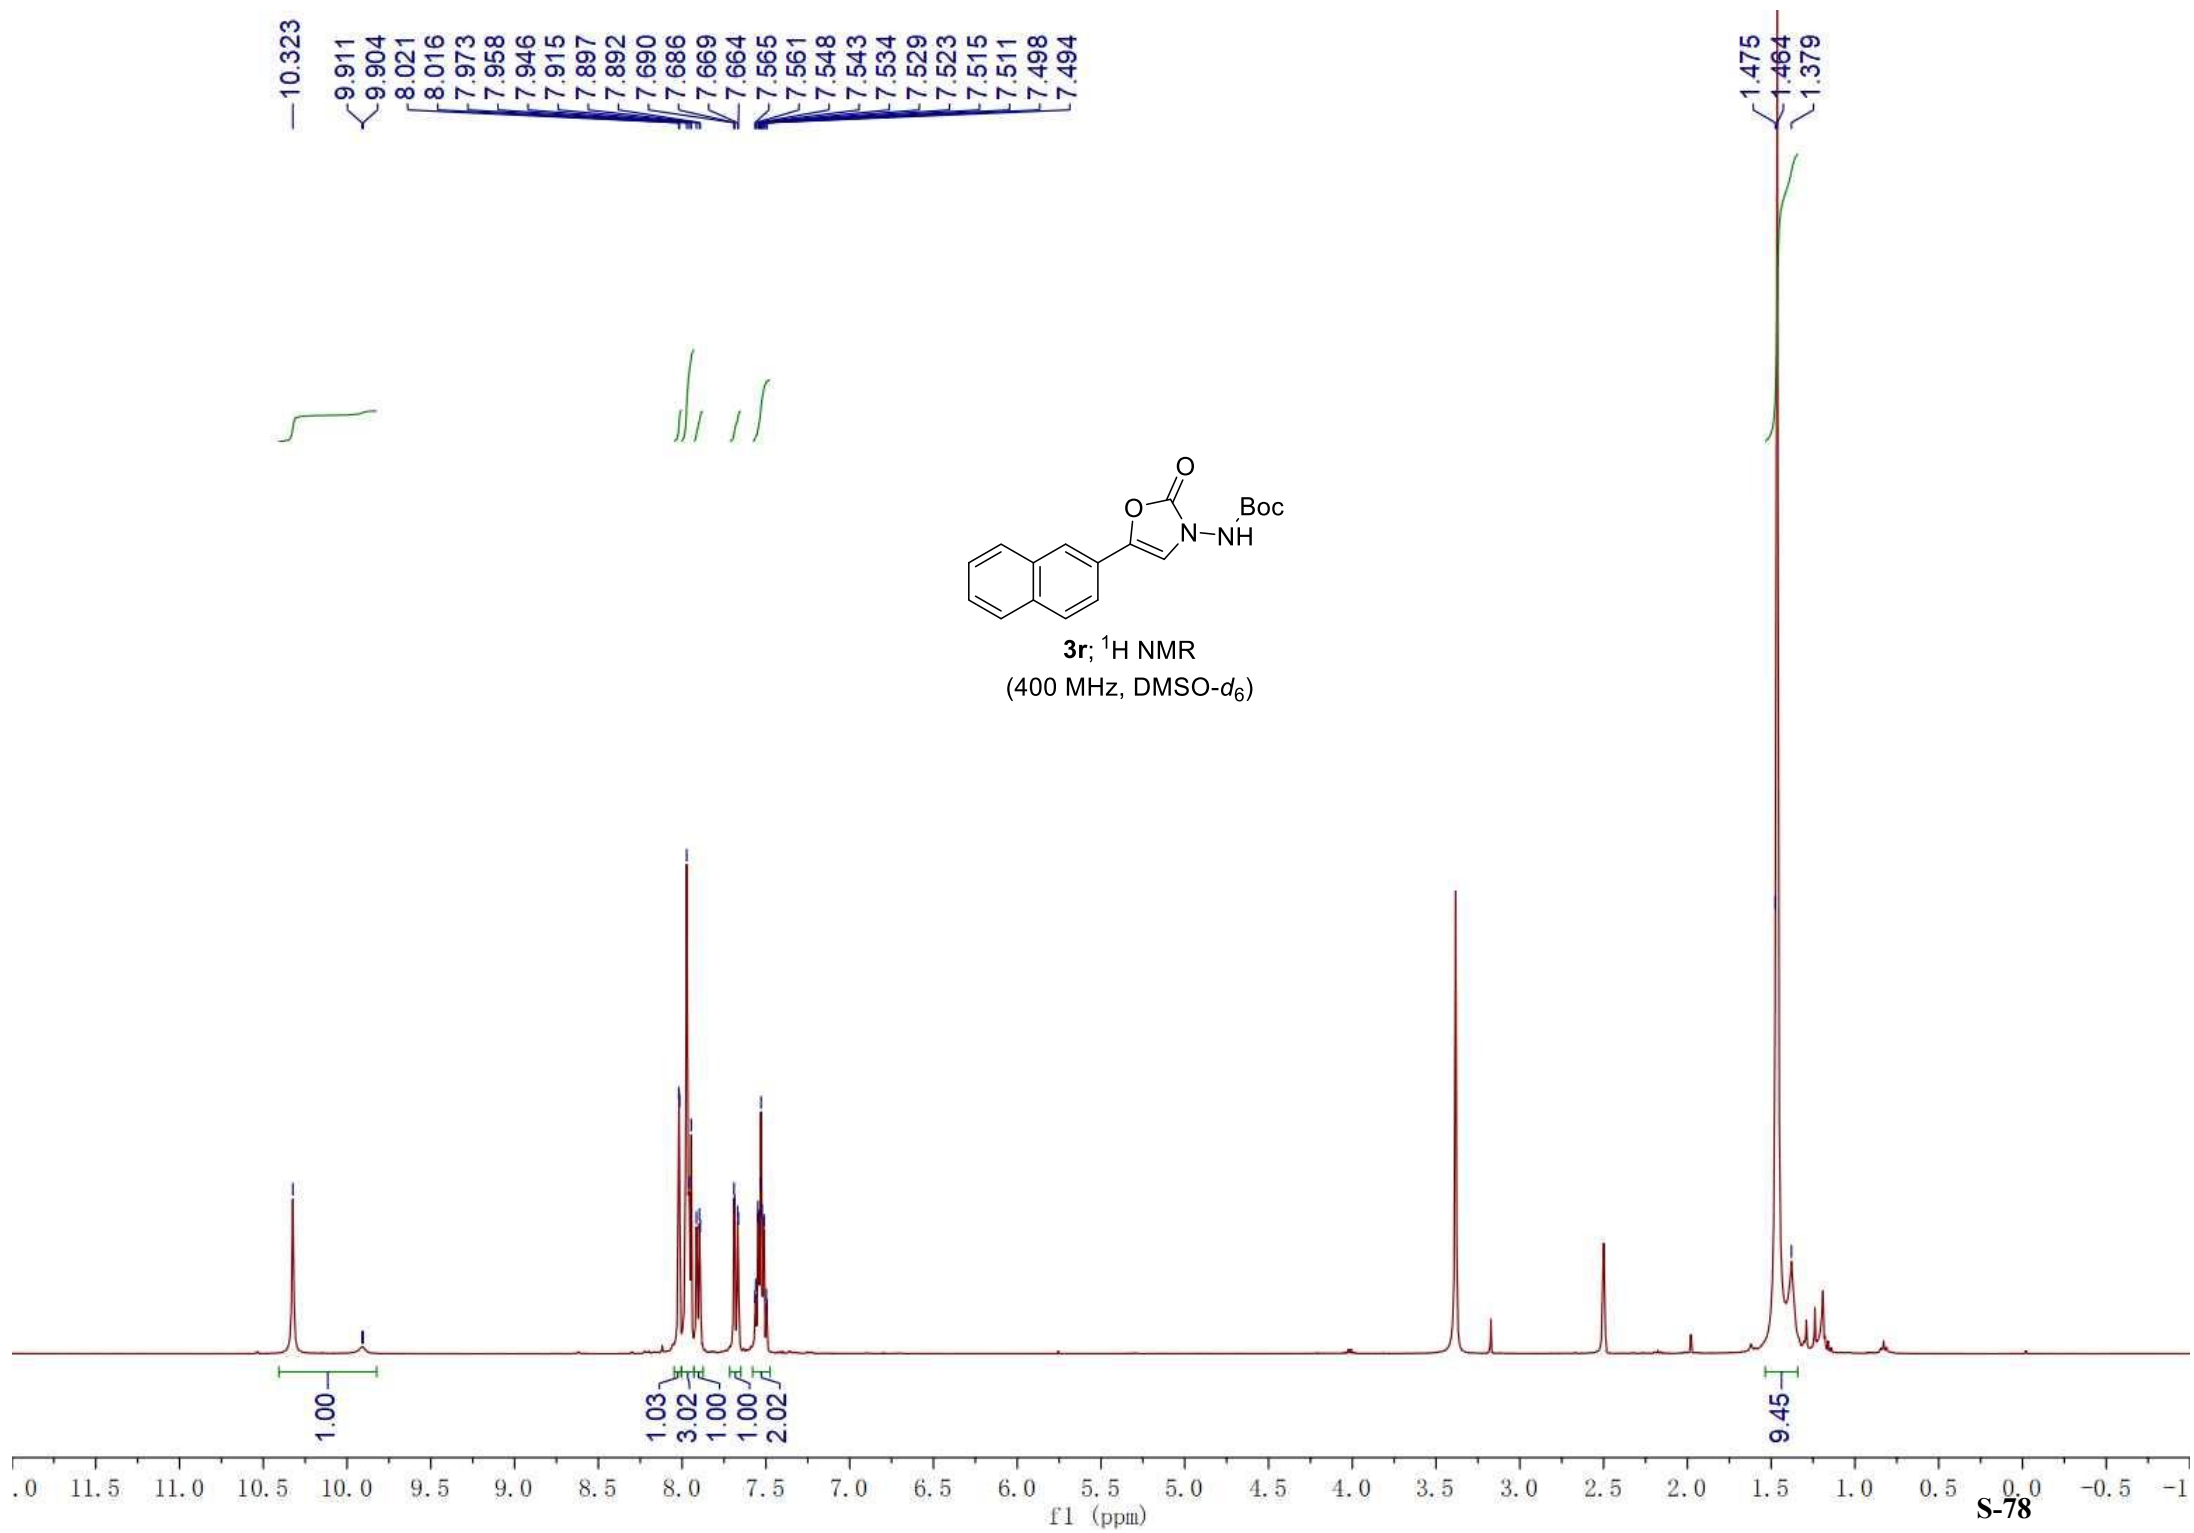

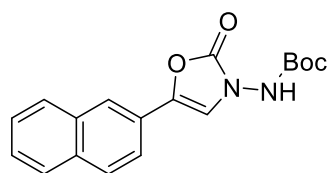

**3r**;  $^1\text{H}$  NMR  
(400 MHz,  $\text{DMSO}-d_6$ )

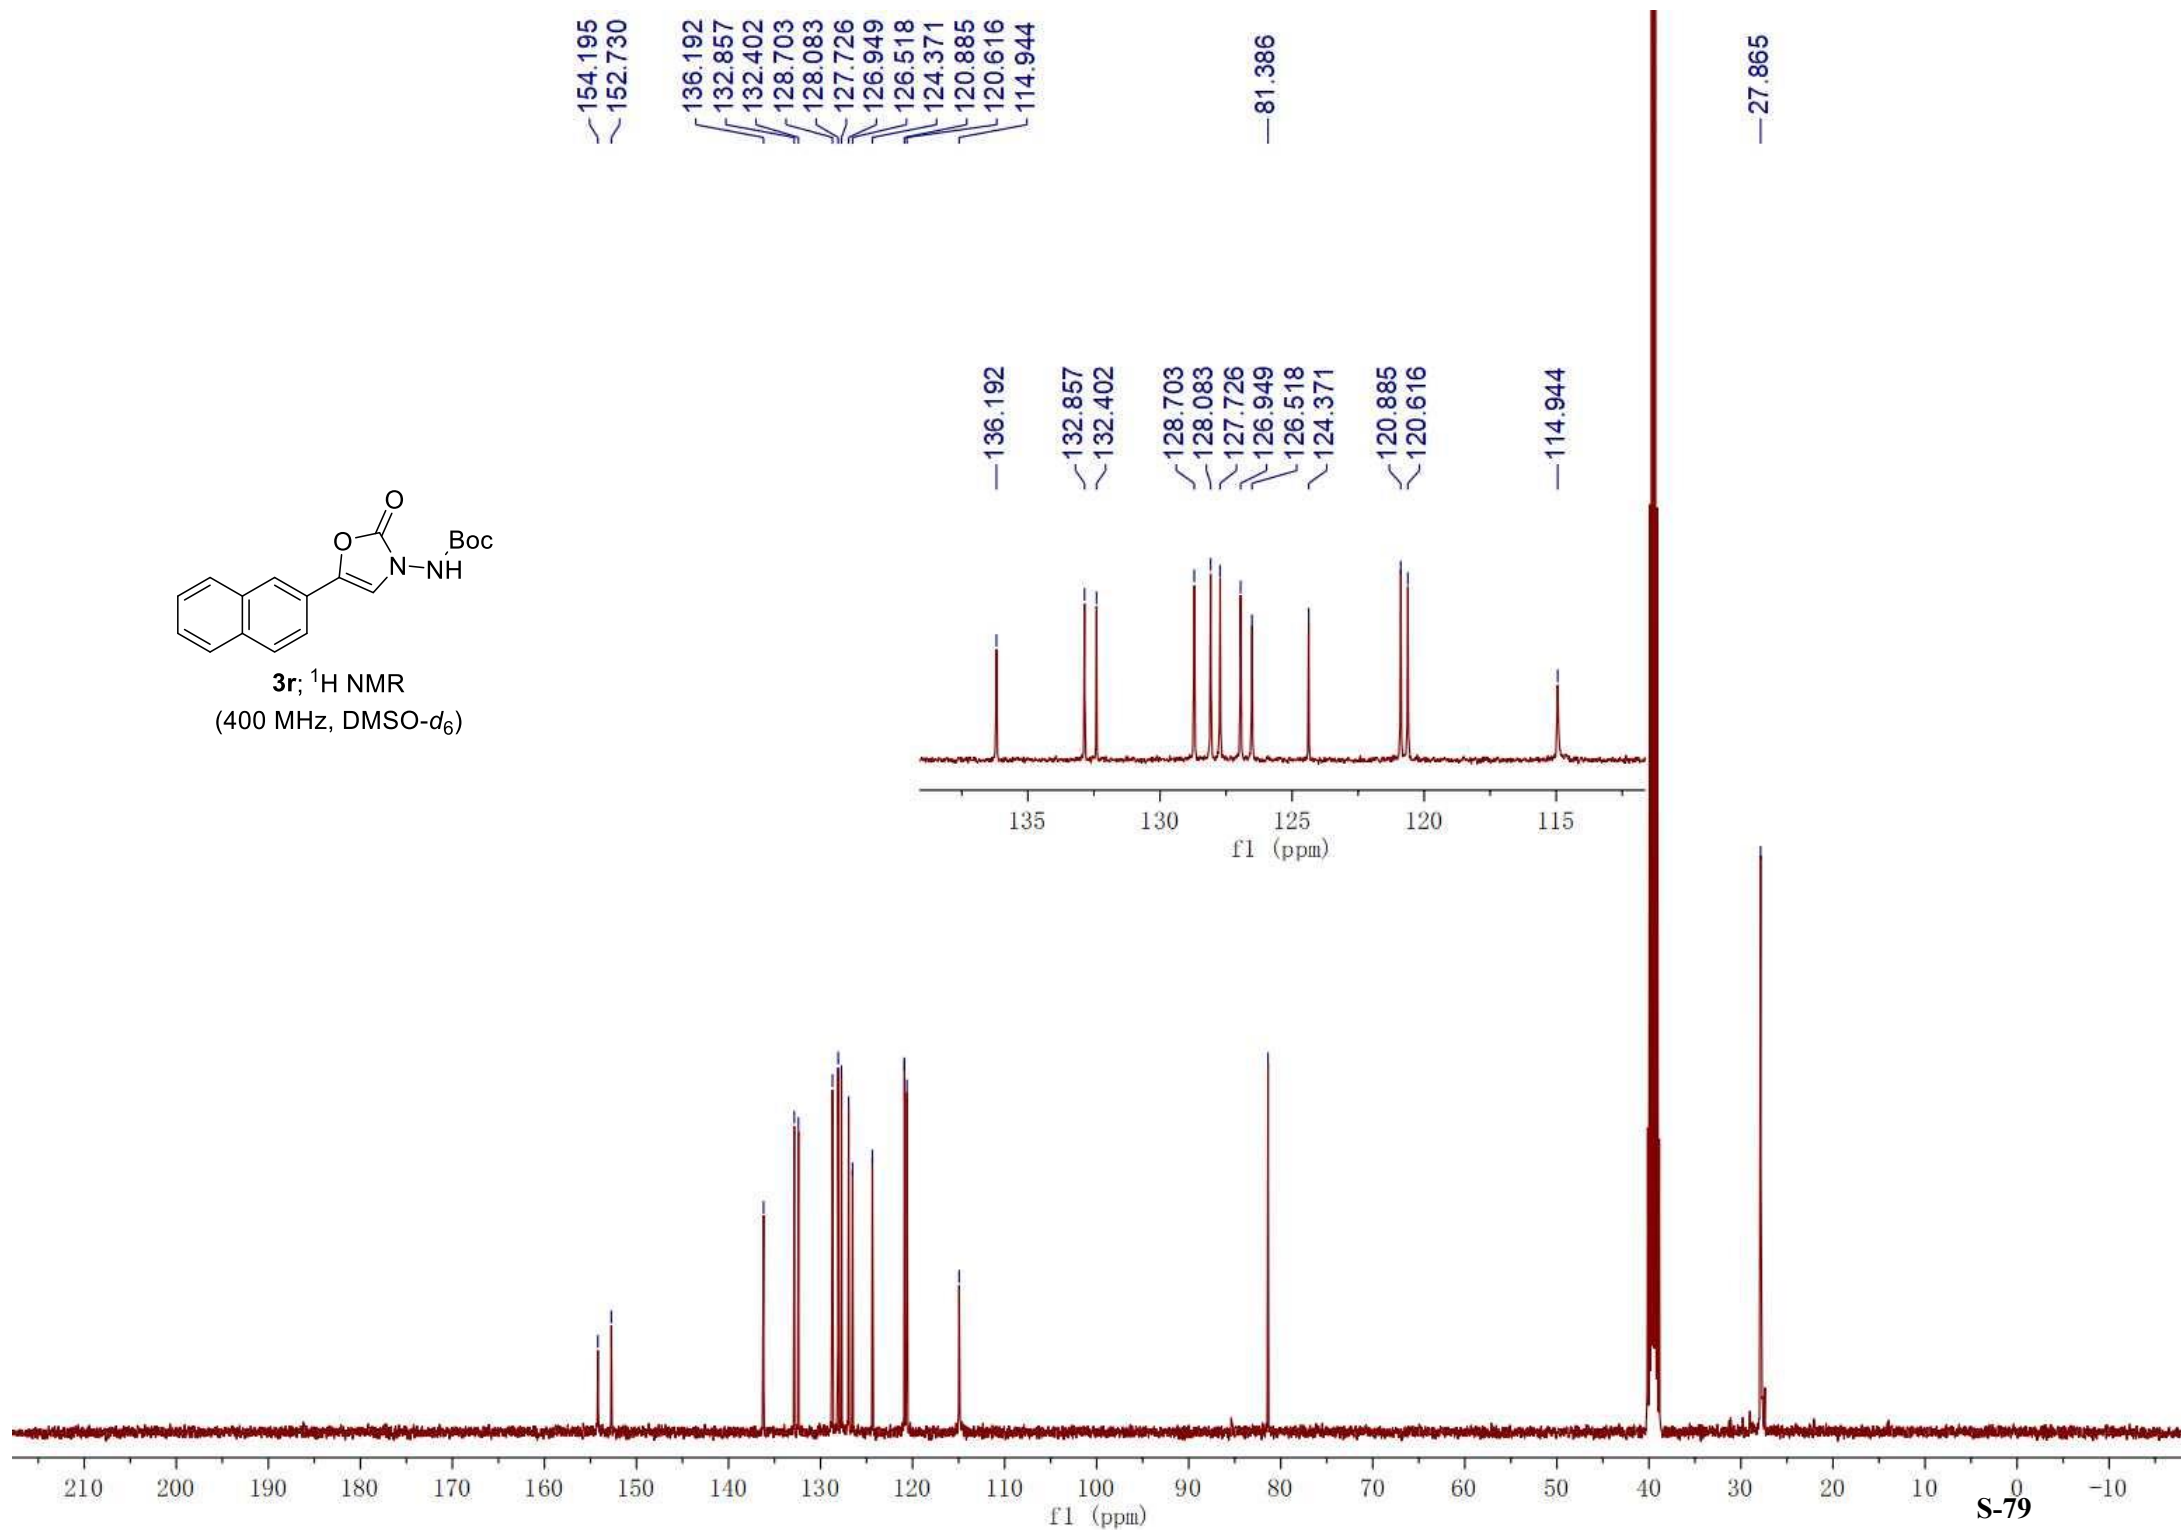

-10.221

-9.802

7.678  
7.670  
7.665  
7.658  
7.643  
7.640  
7.635  
7.632  
7.622  
7.315  
7.312  
7.303  
7.2991.447  
1.361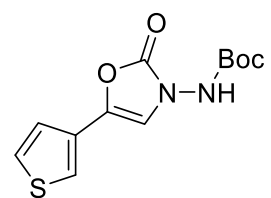

**3s**;  $^1\text{H}$  NMR  
(400 MHz,  $\text{DMSO}-d_6$ )

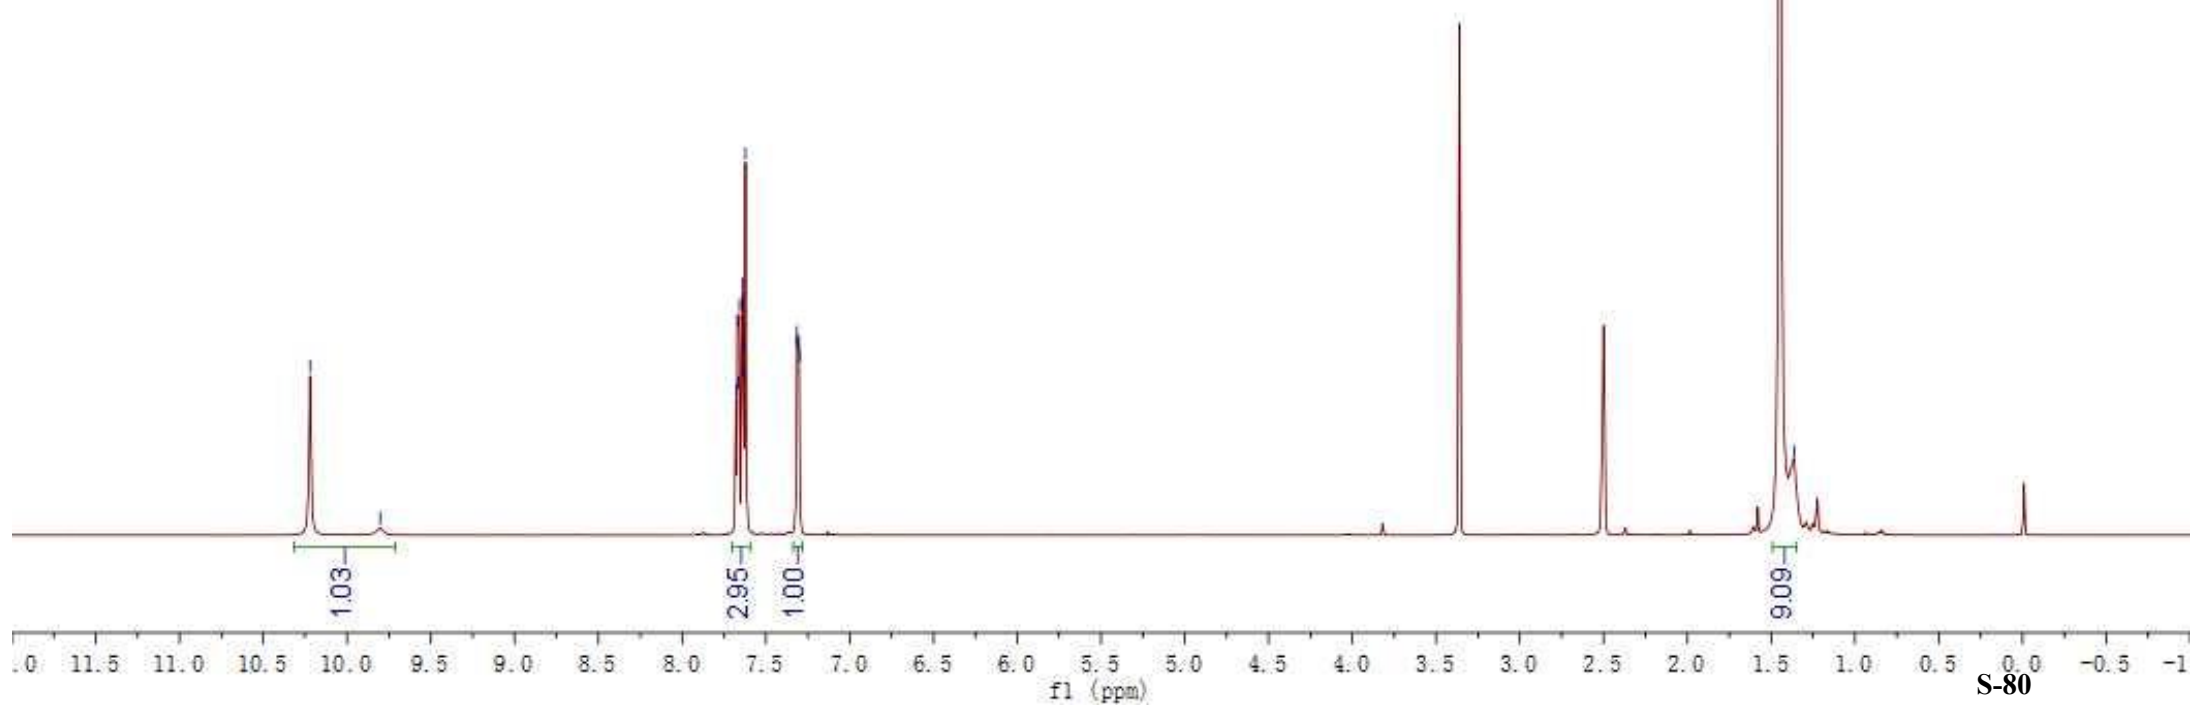

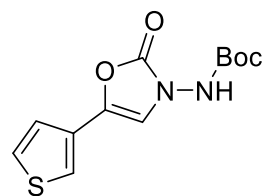

**3s**;  $^{13}\text{C}\{^1\text{H}\}$  NMR  
(101 MHz,  $\text{DMSO}-d_6$ )

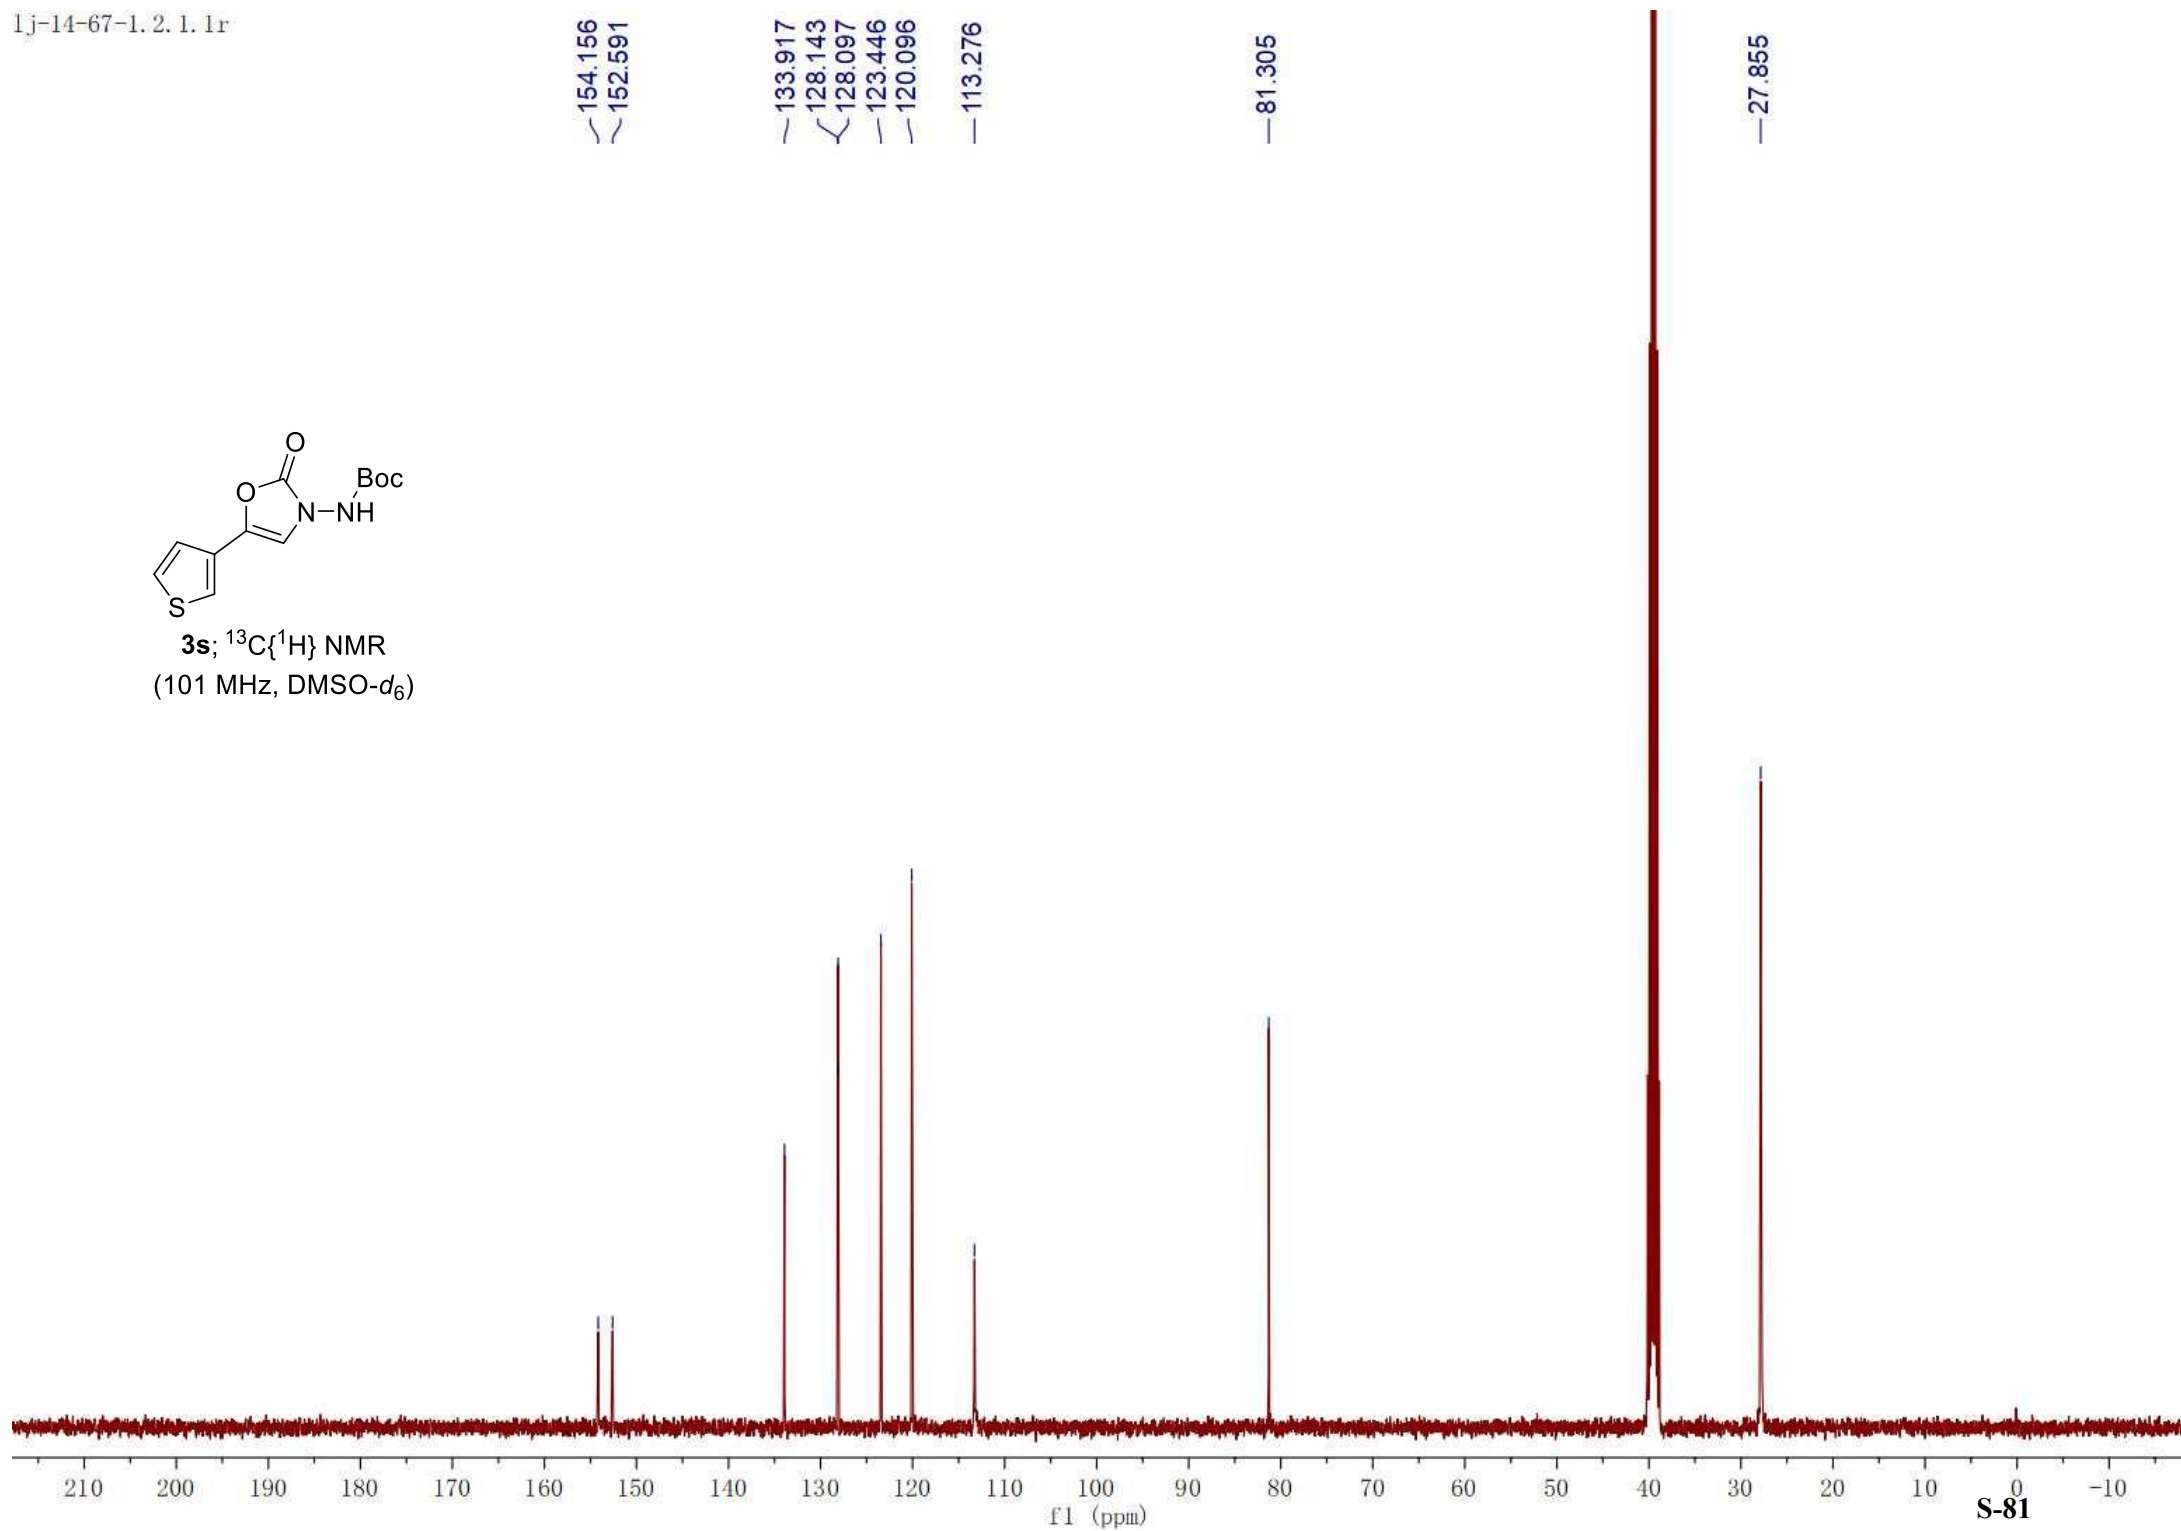

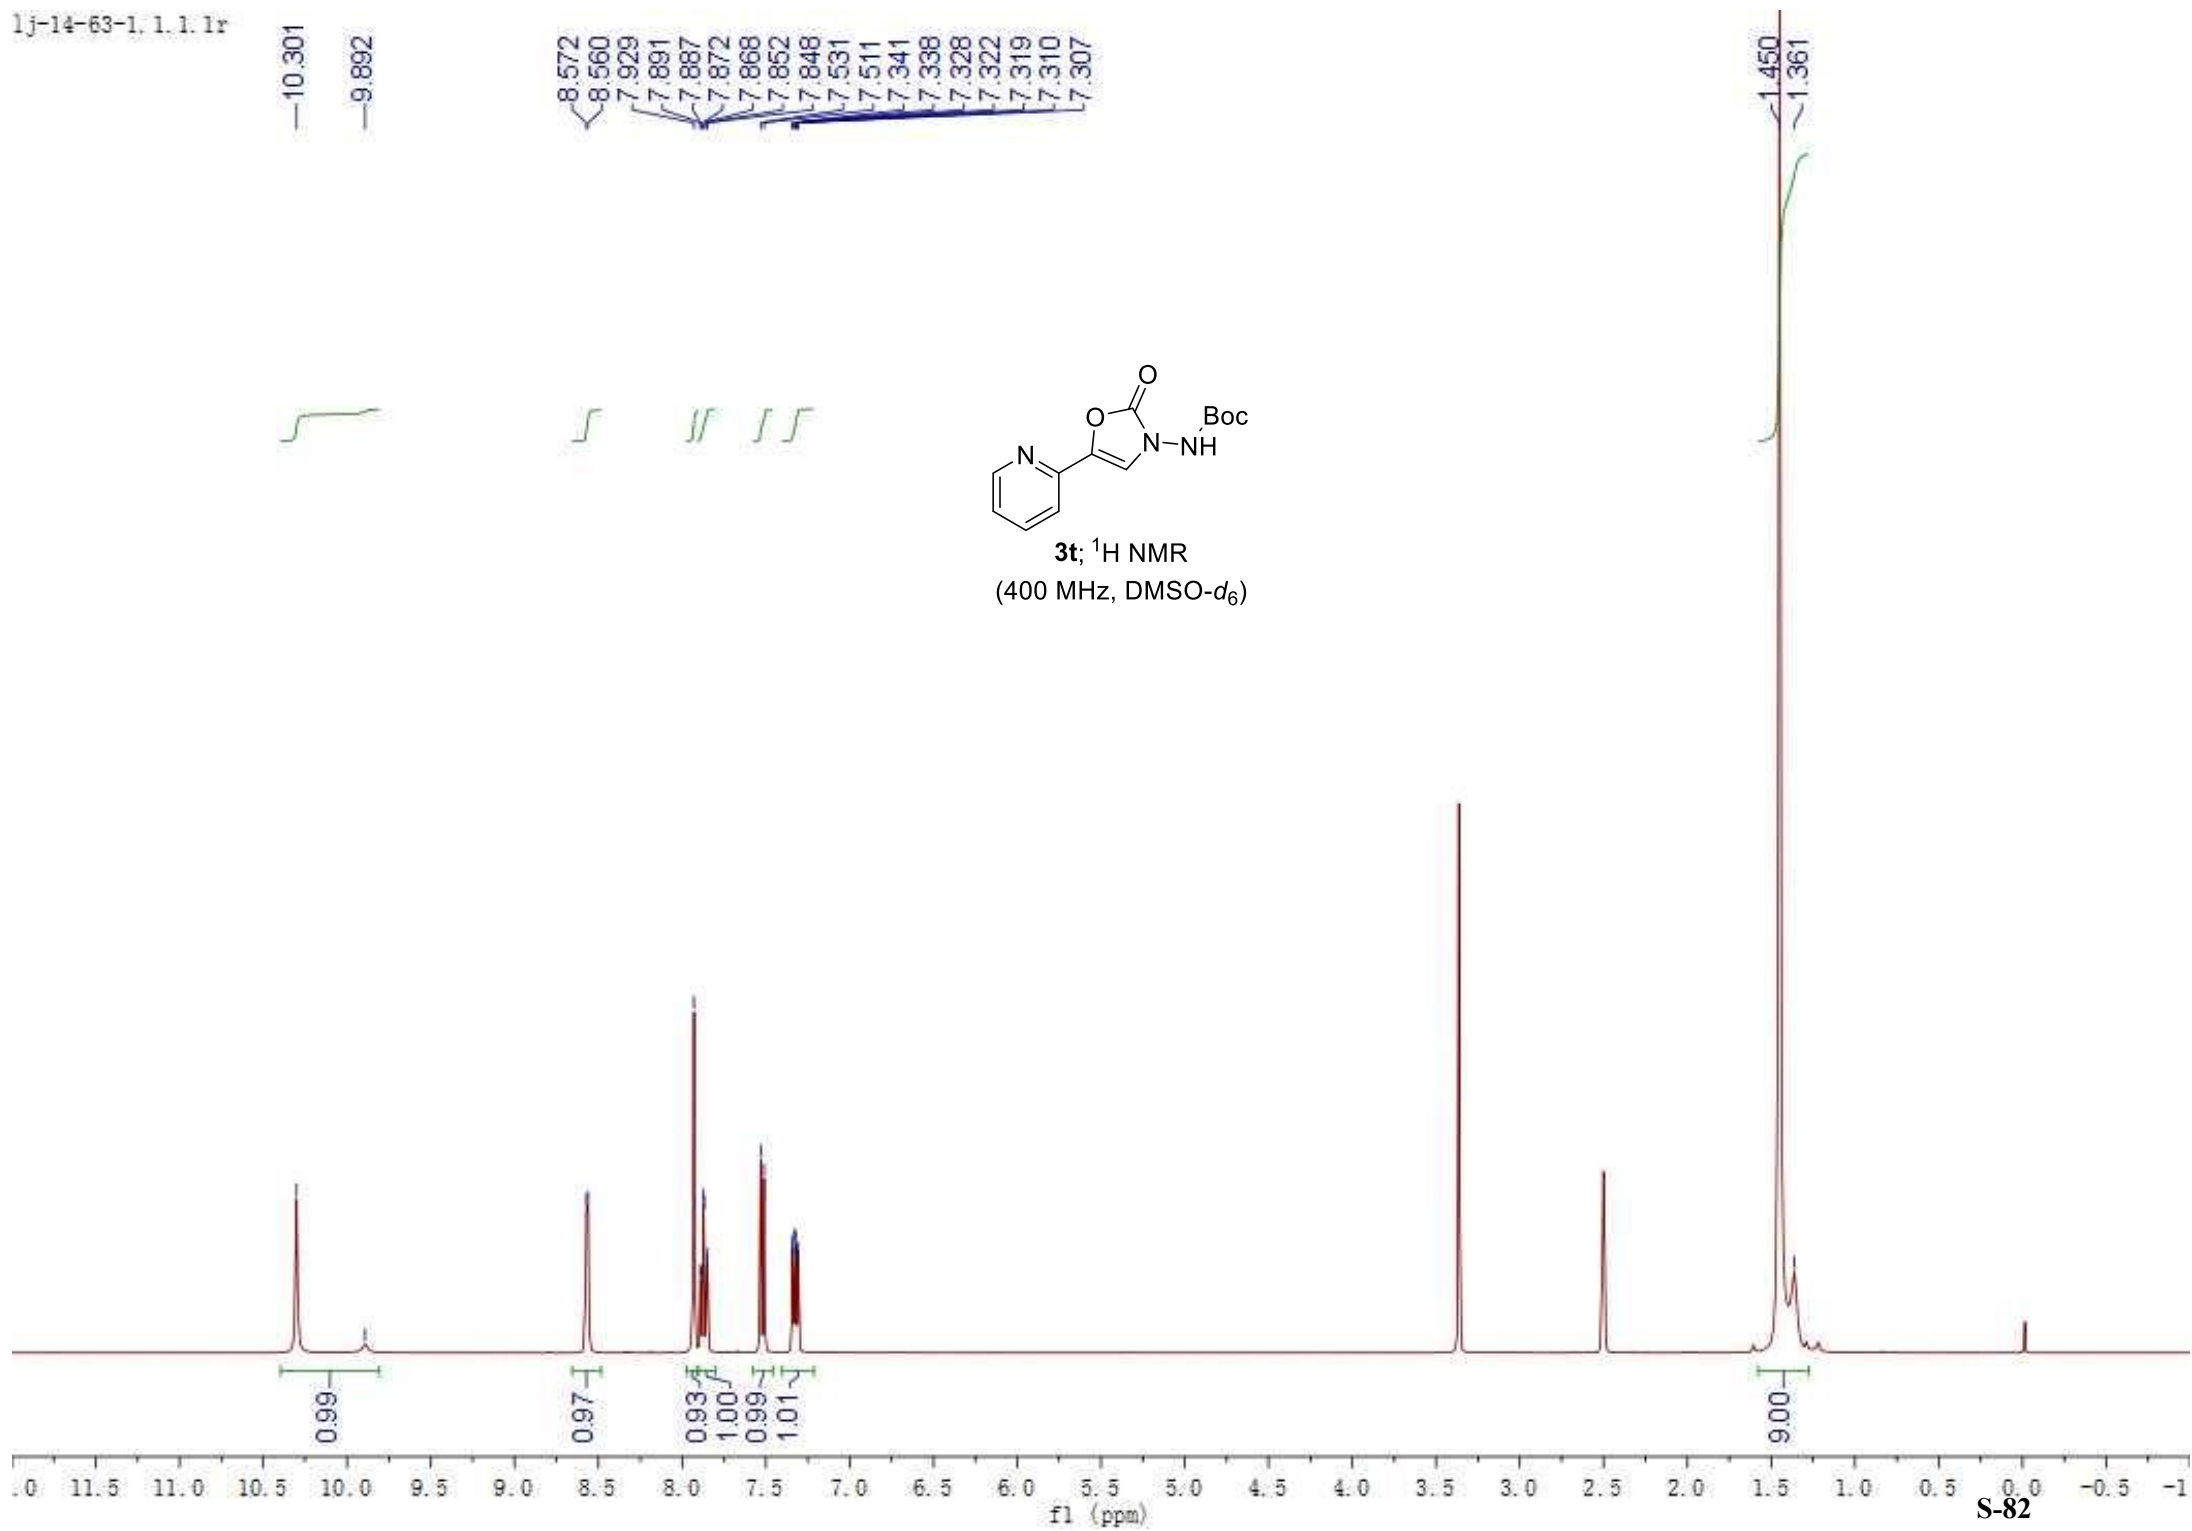

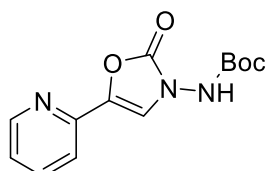

**3t**;  $^{13}\text{C}\{^1\text{H}\}$  NMR  
(101 MHz,  $\text{DMSO}-d_6$ )

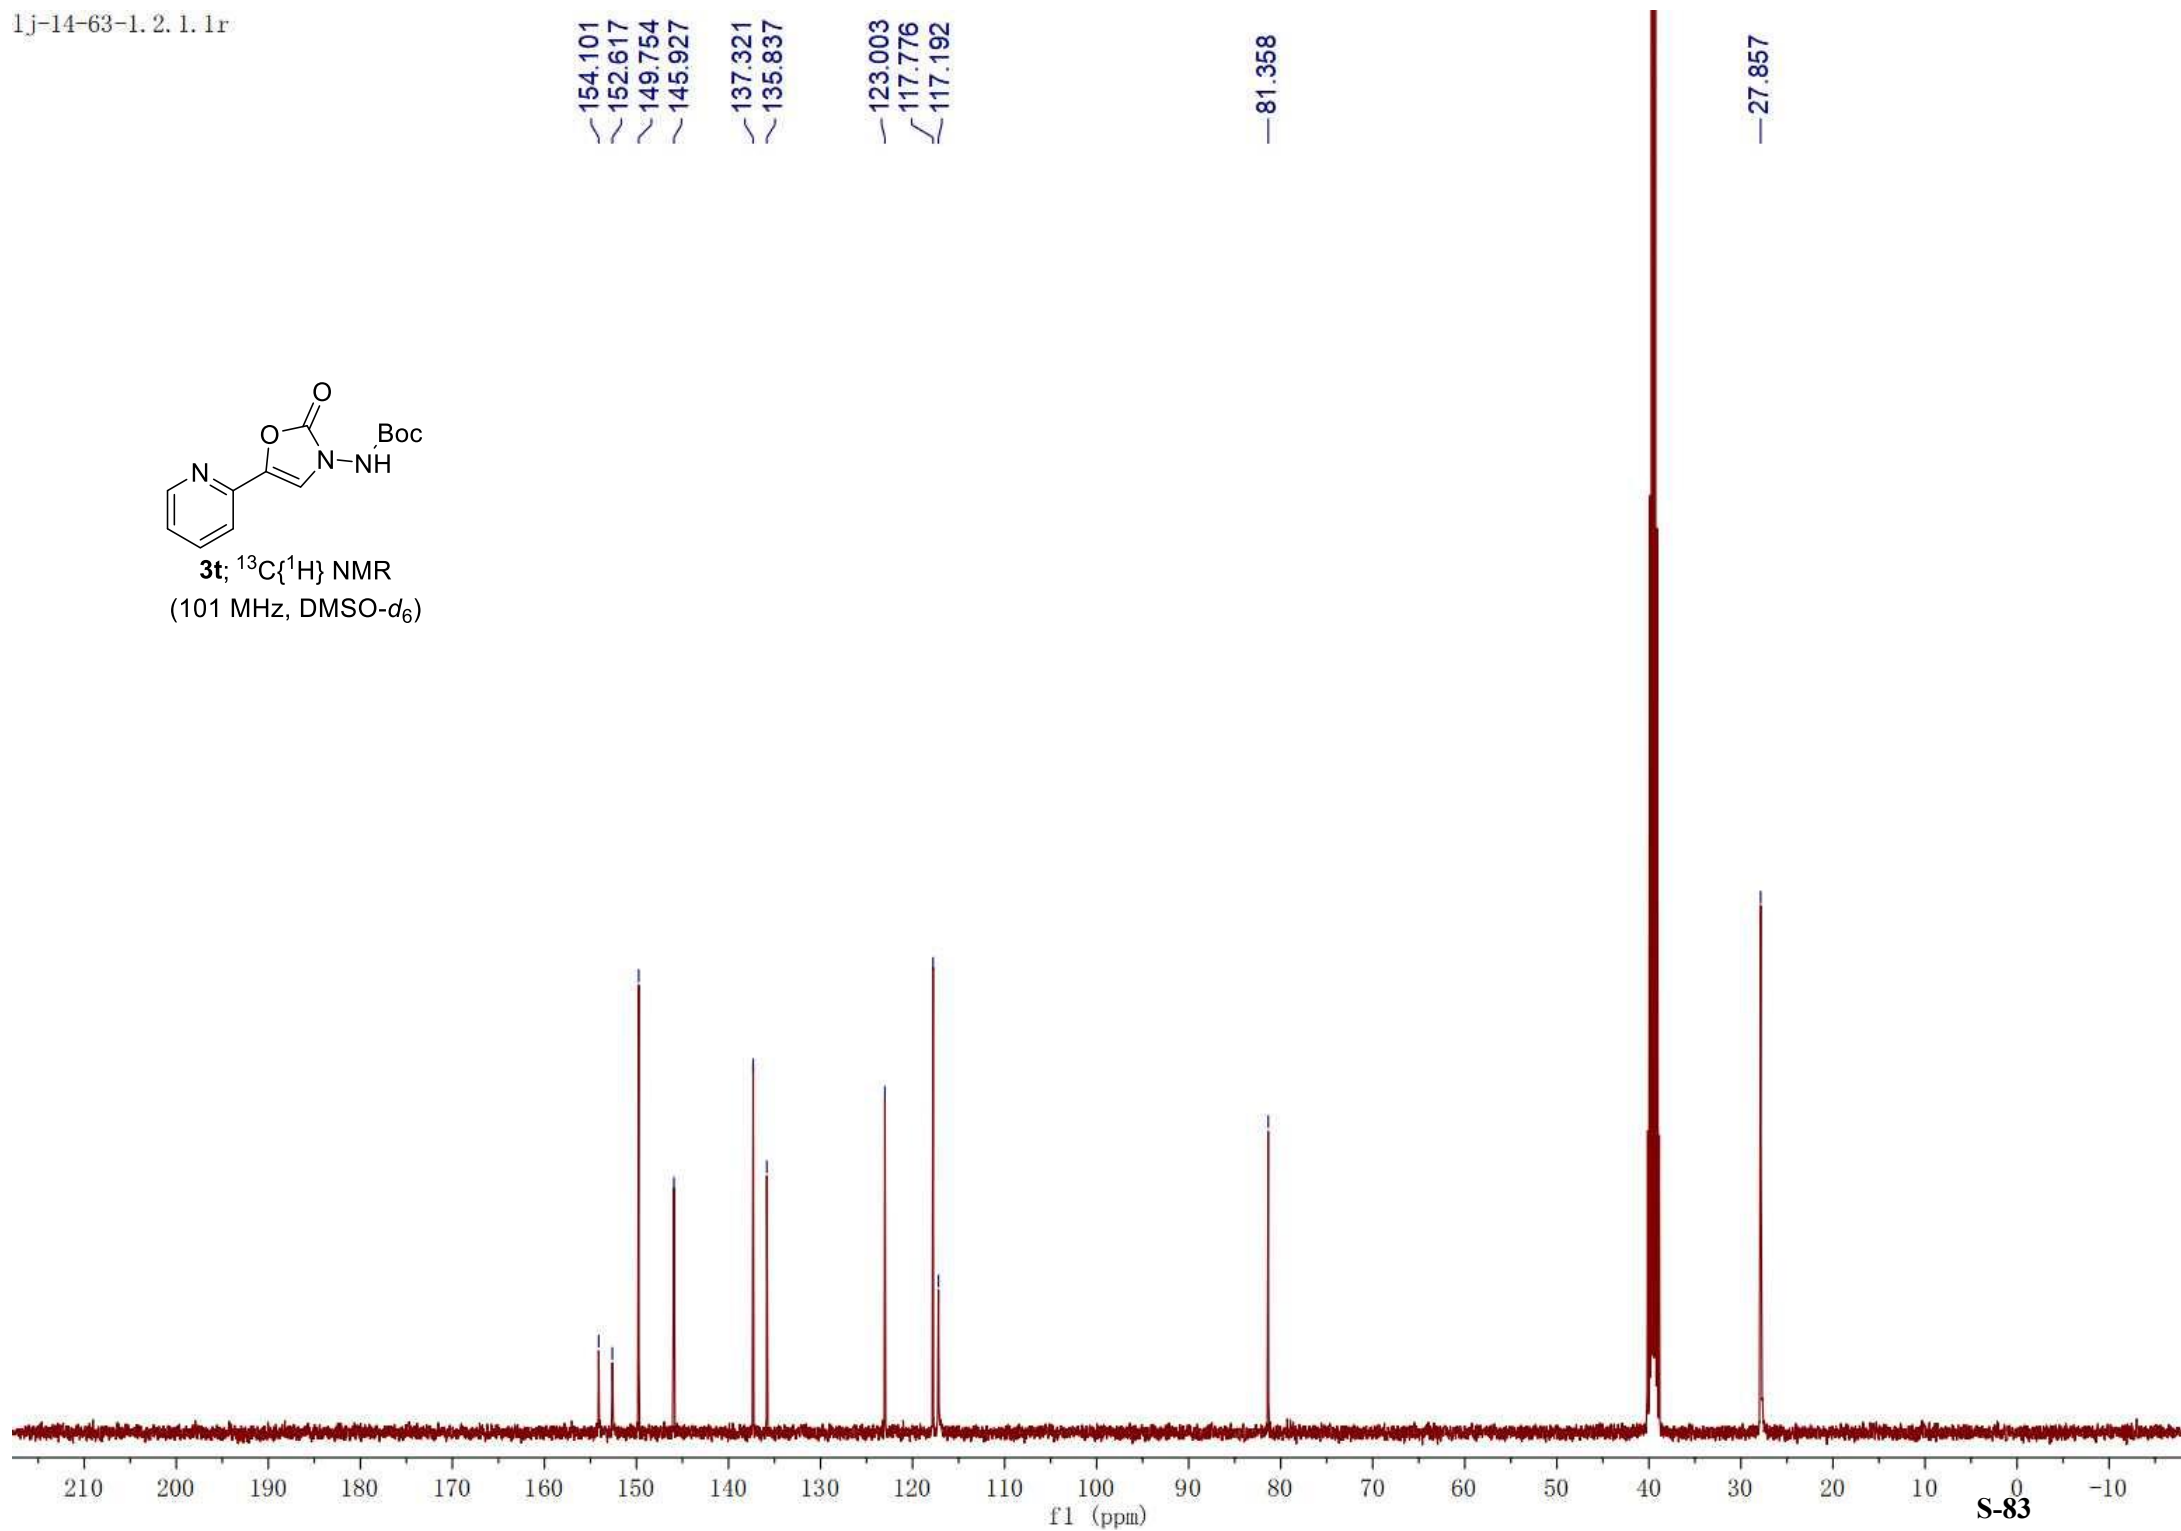

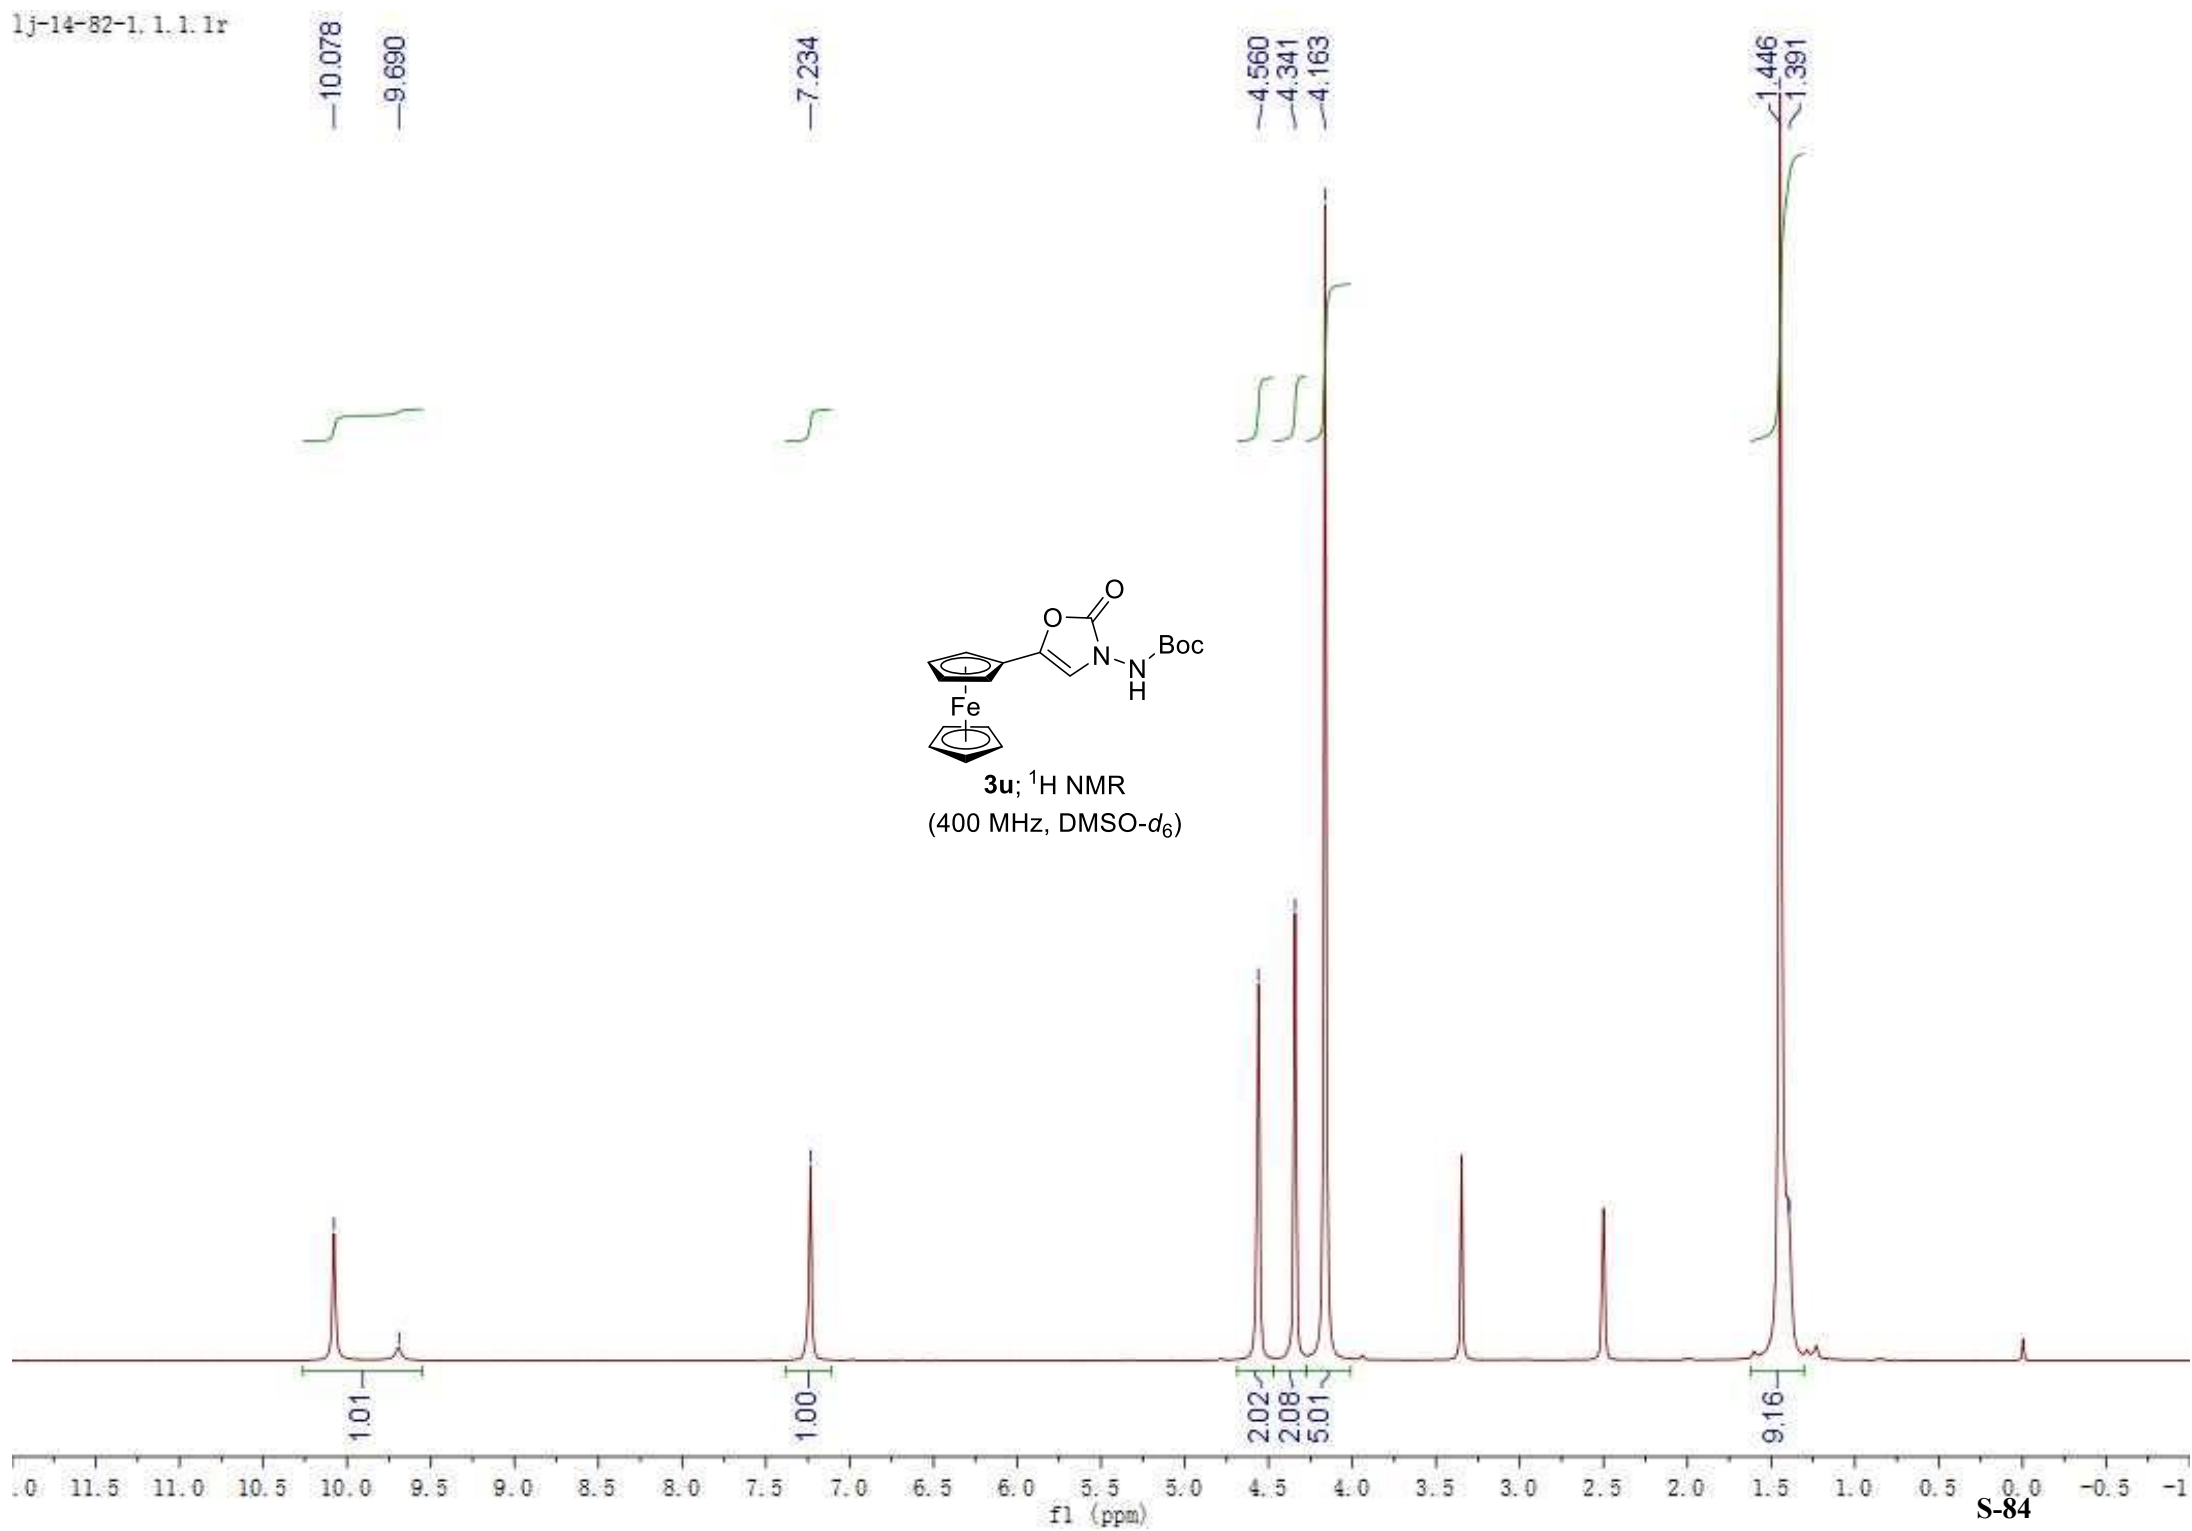



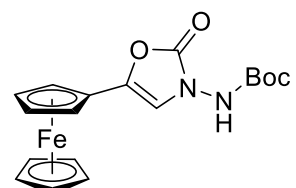

**3u**,  $^{13}\text{C}\{^1\text{H}\}$  NMR  
(101 MHz,  $\text{DMSO}-d_6$ )

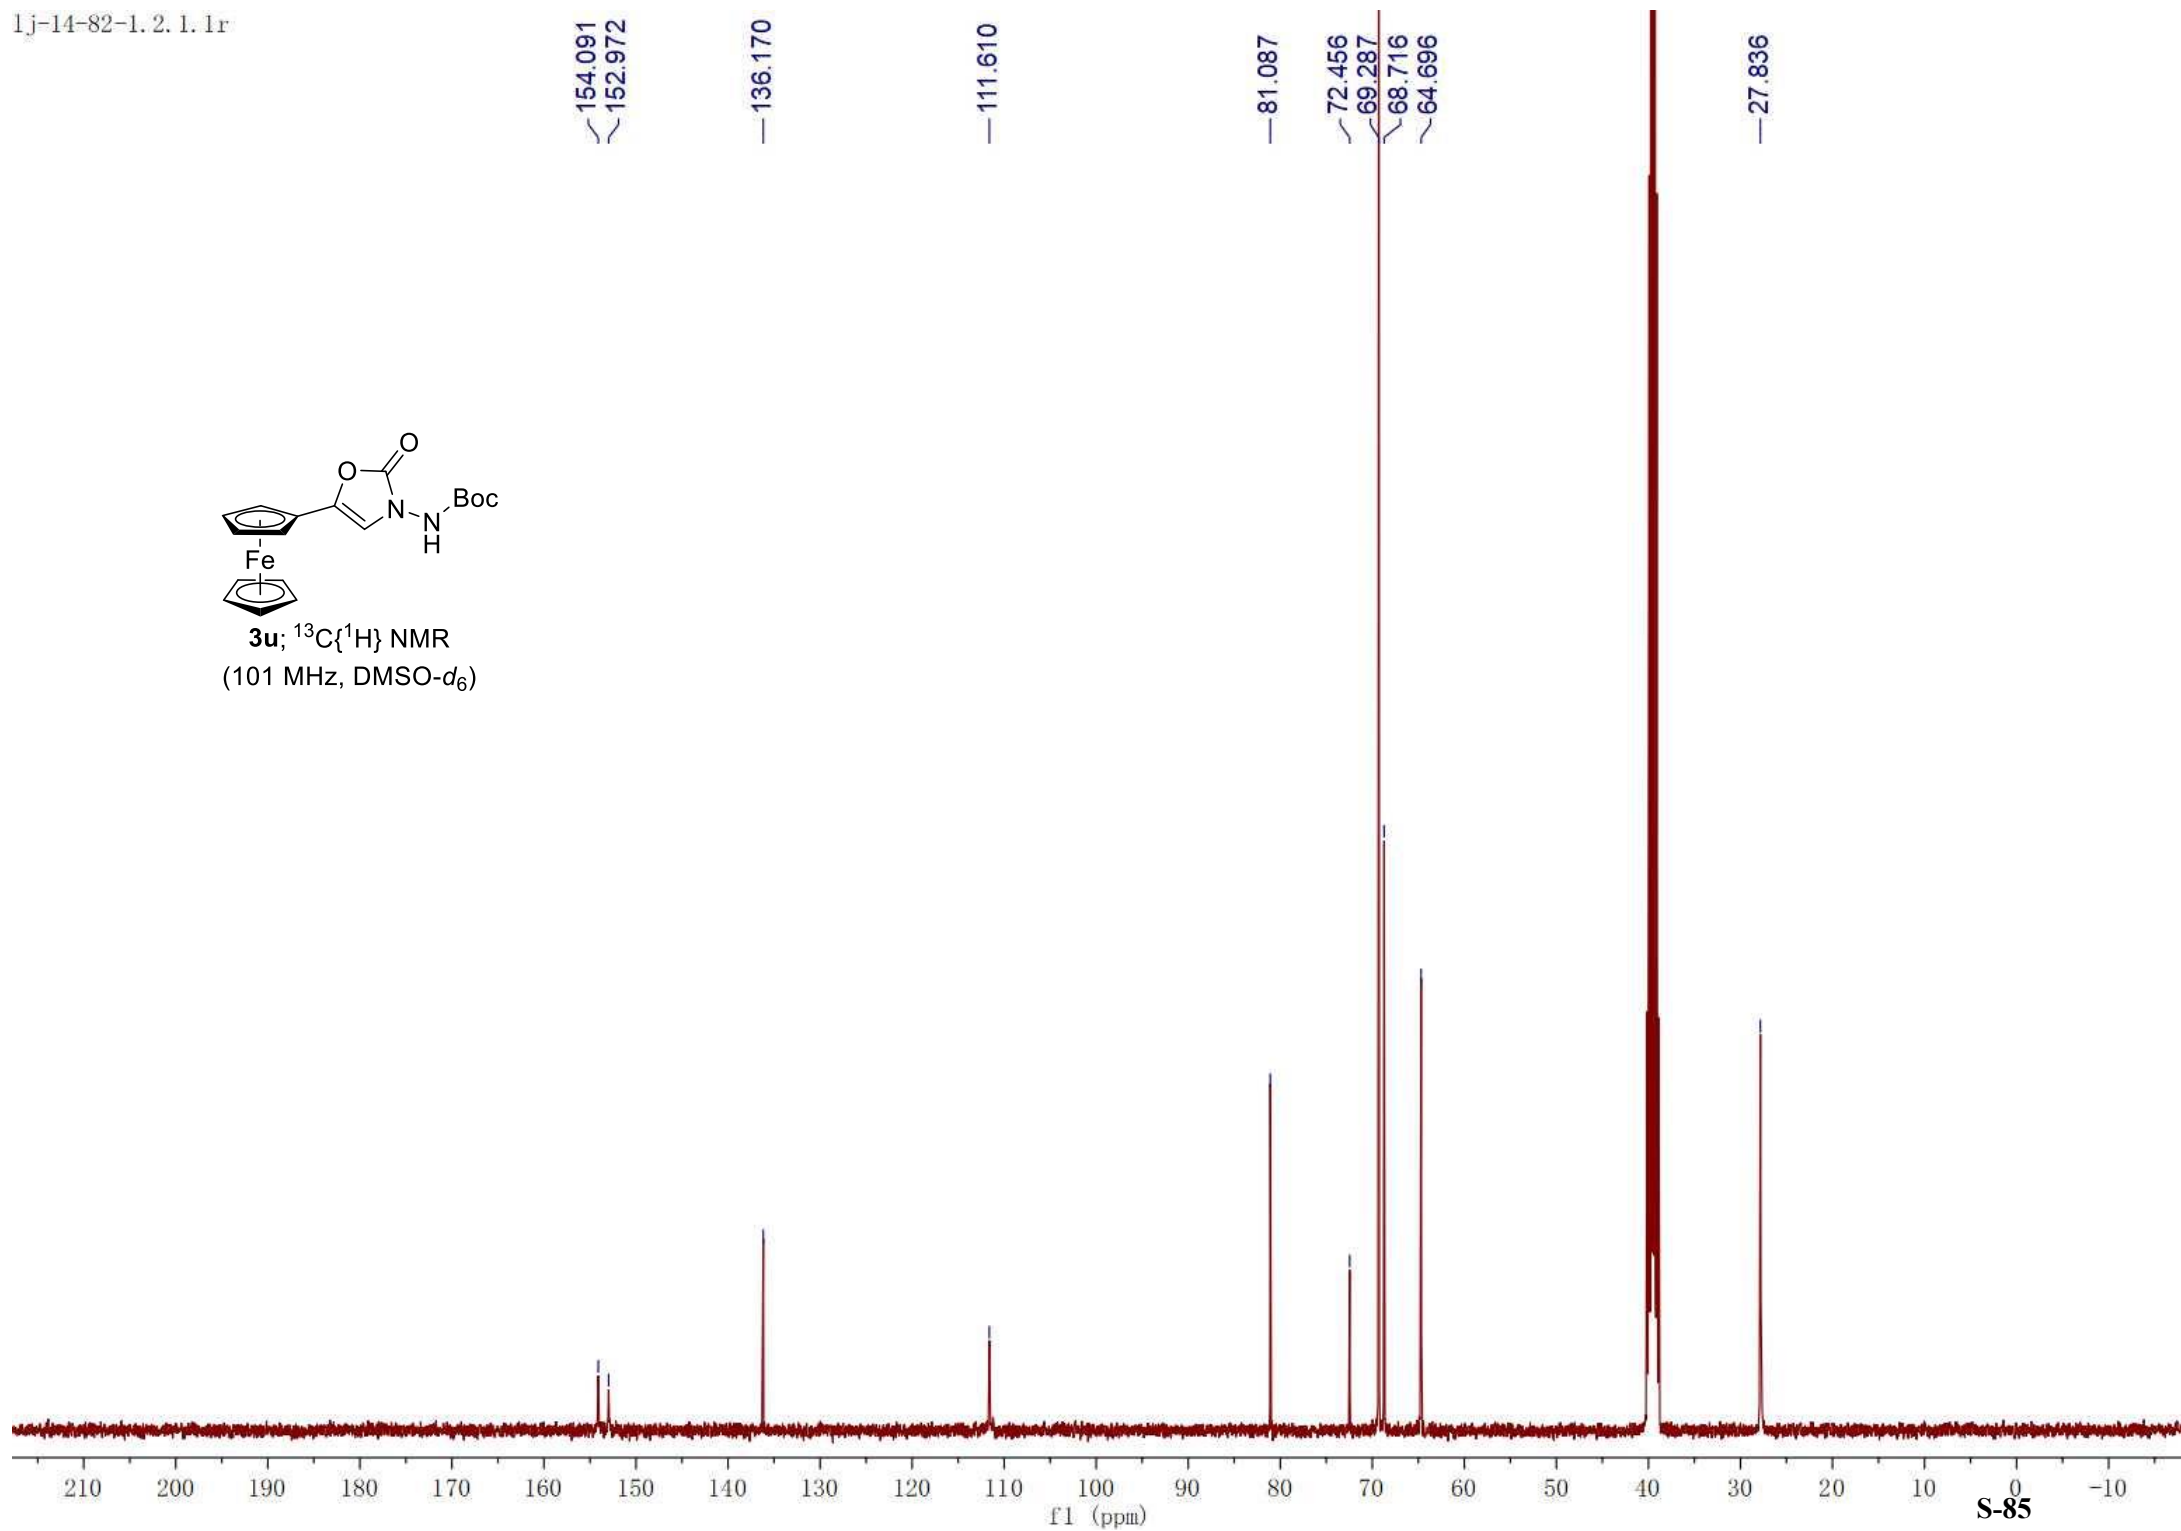

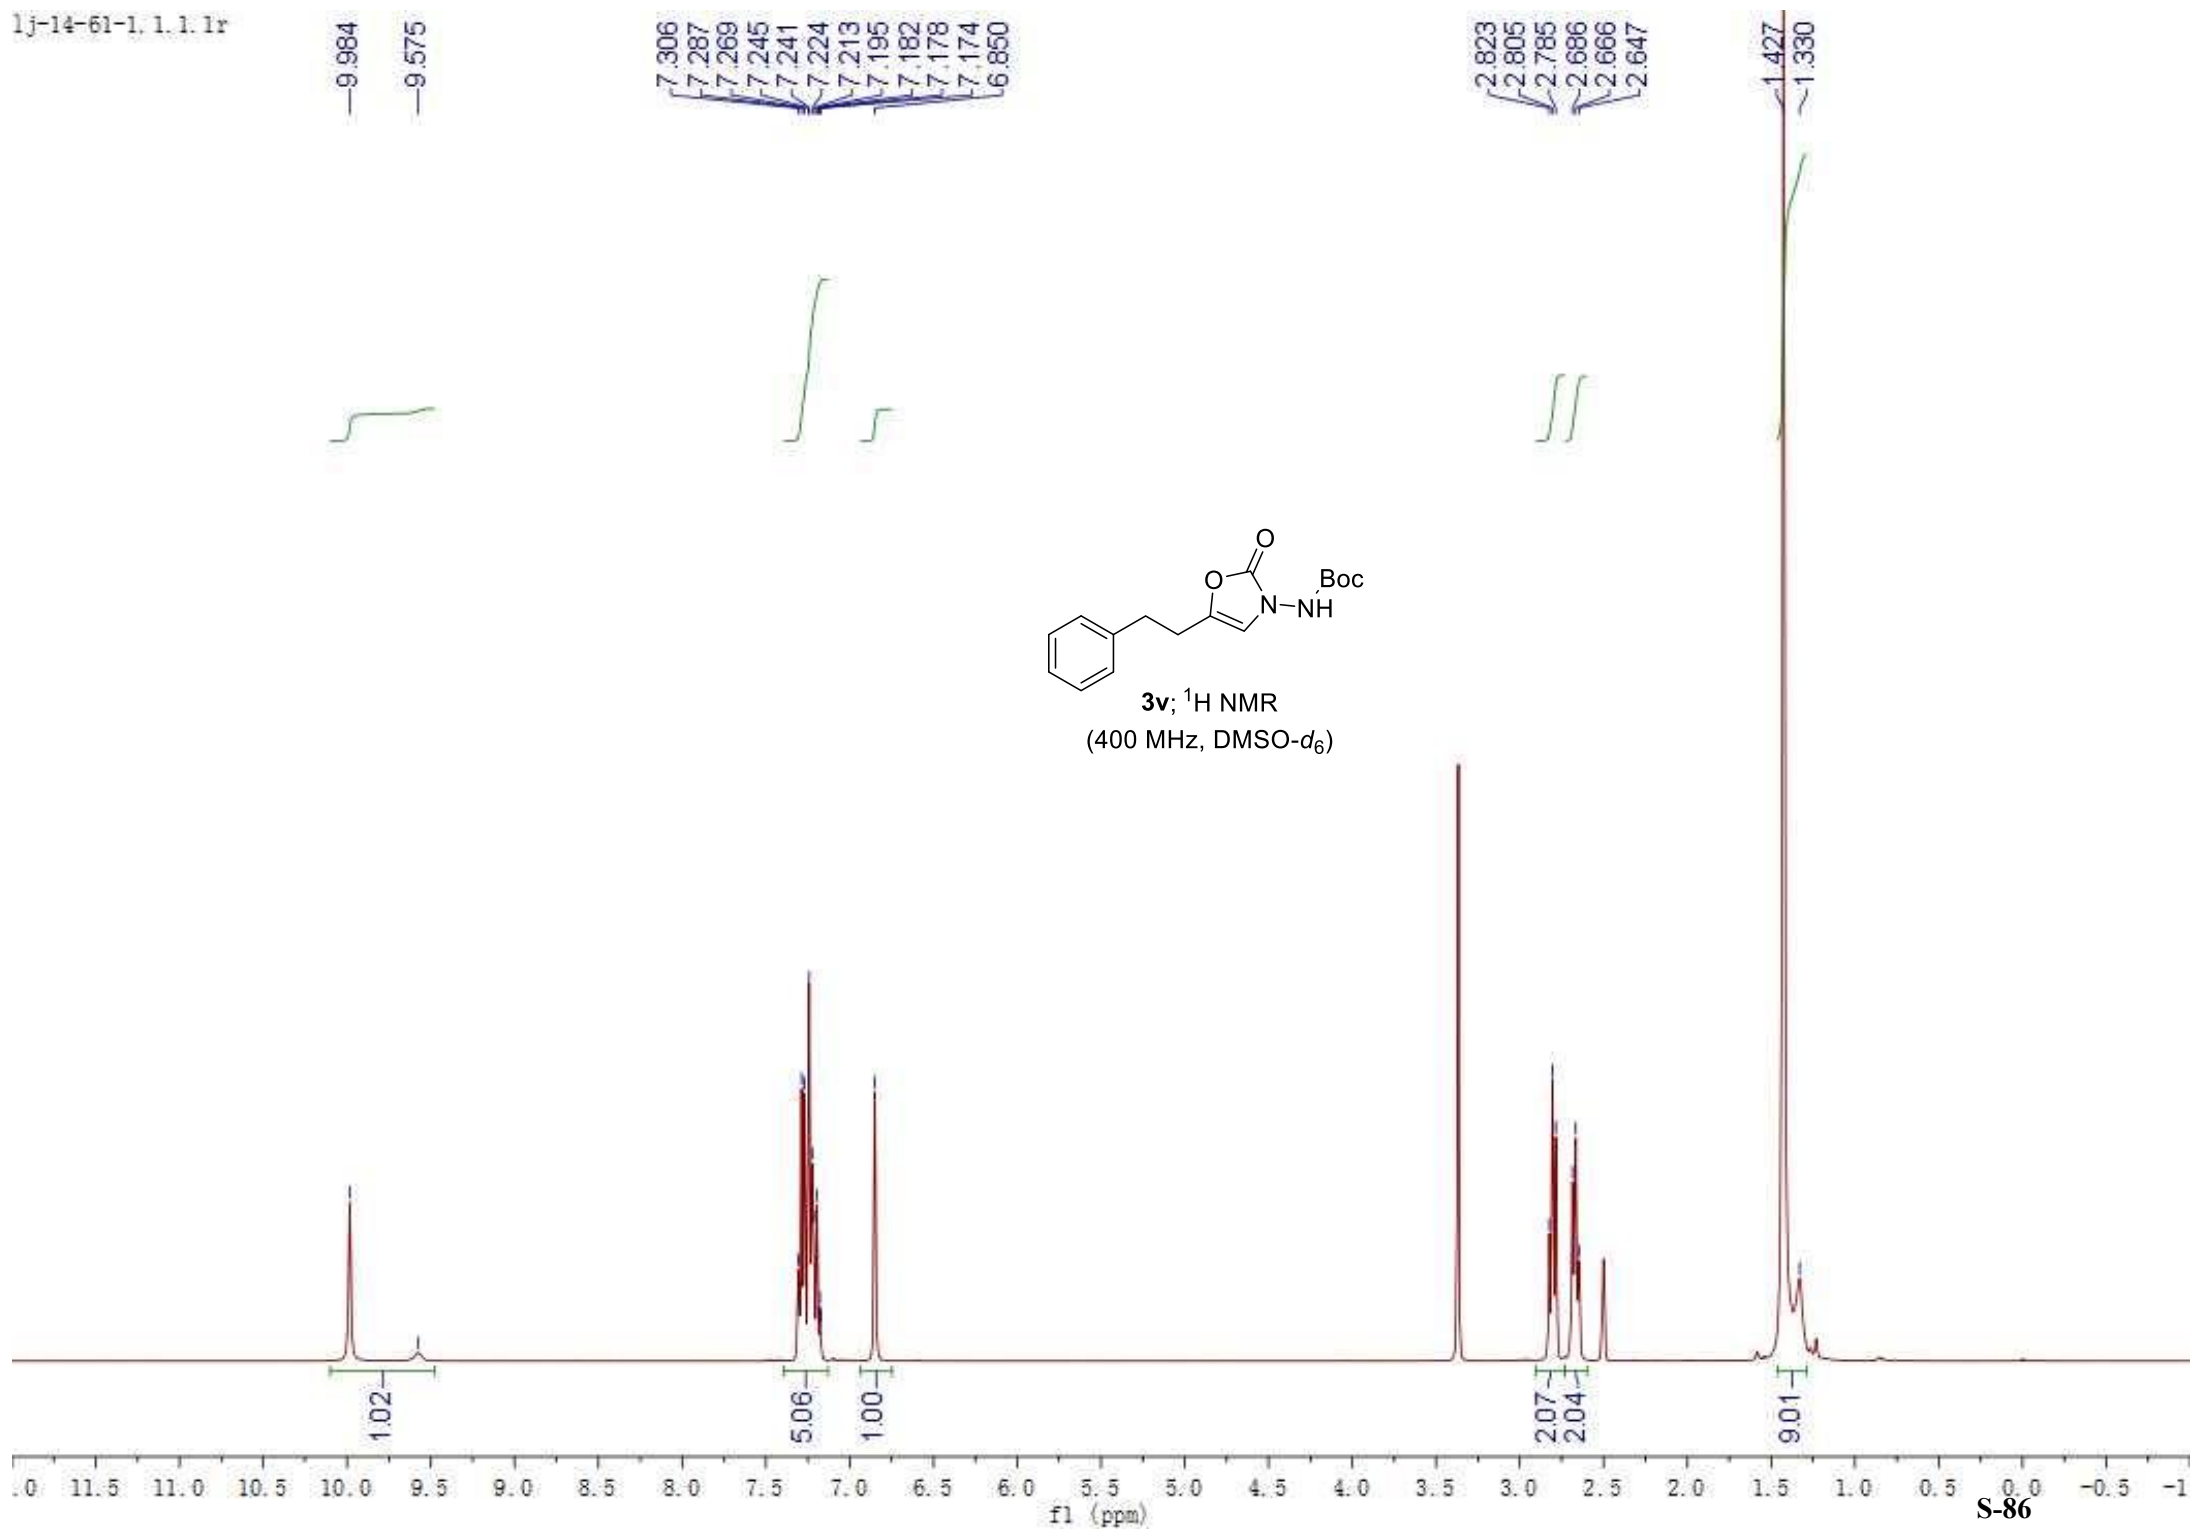

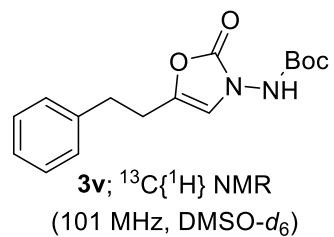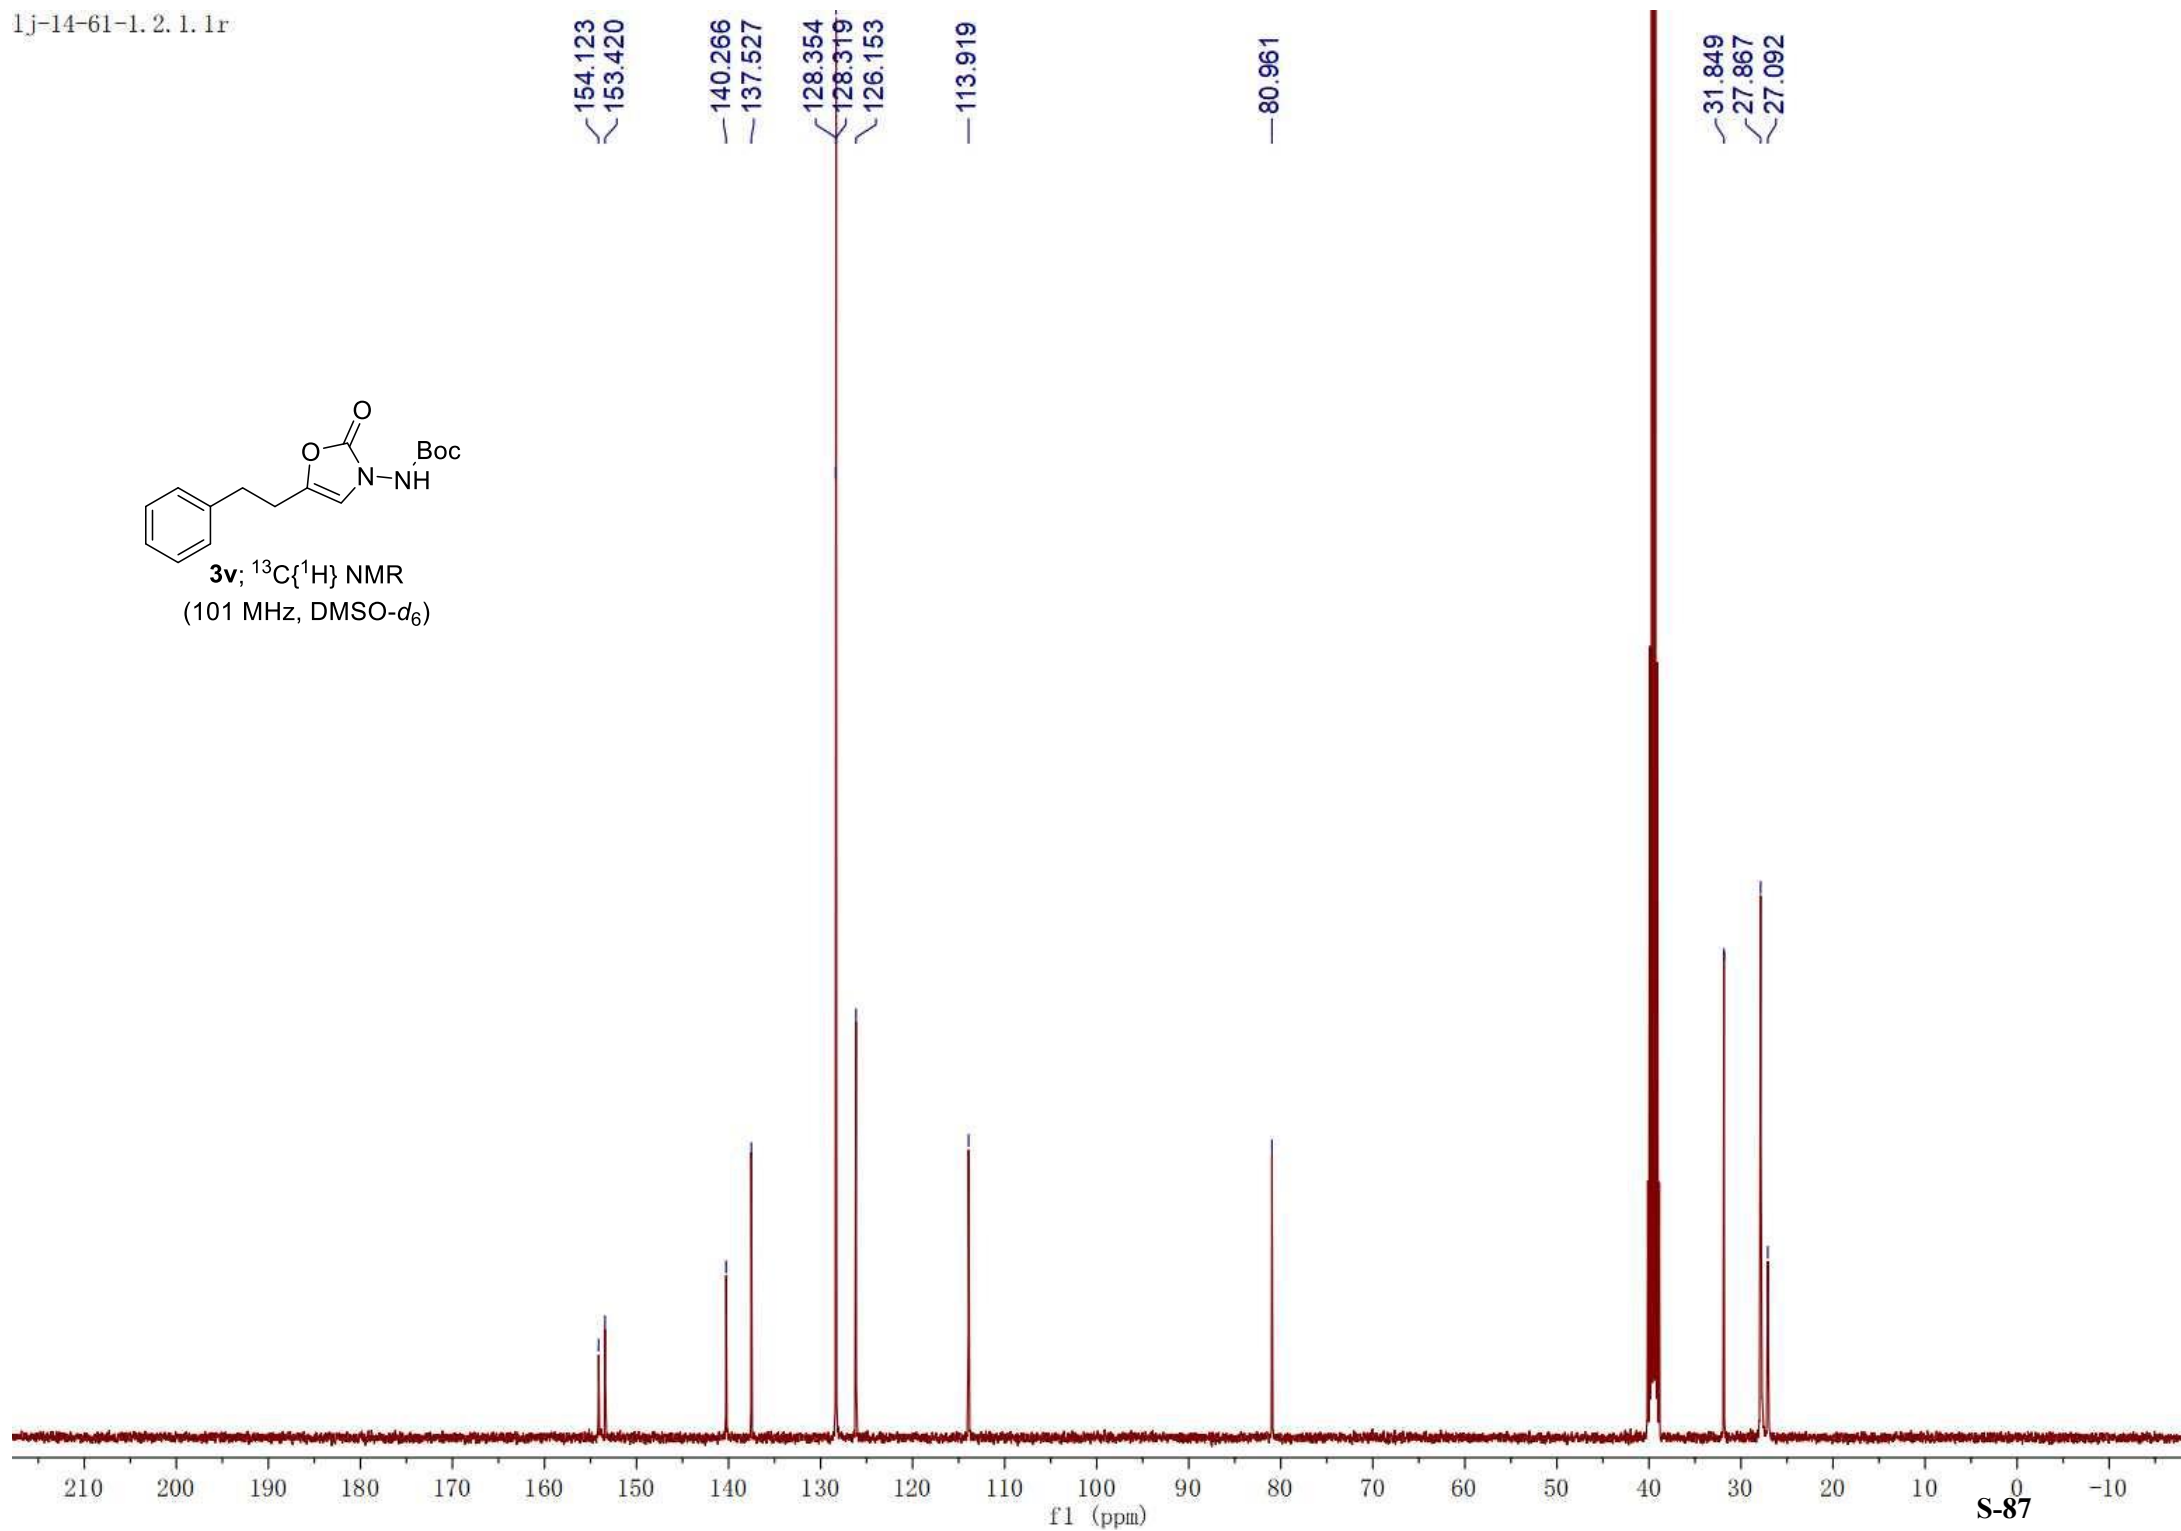

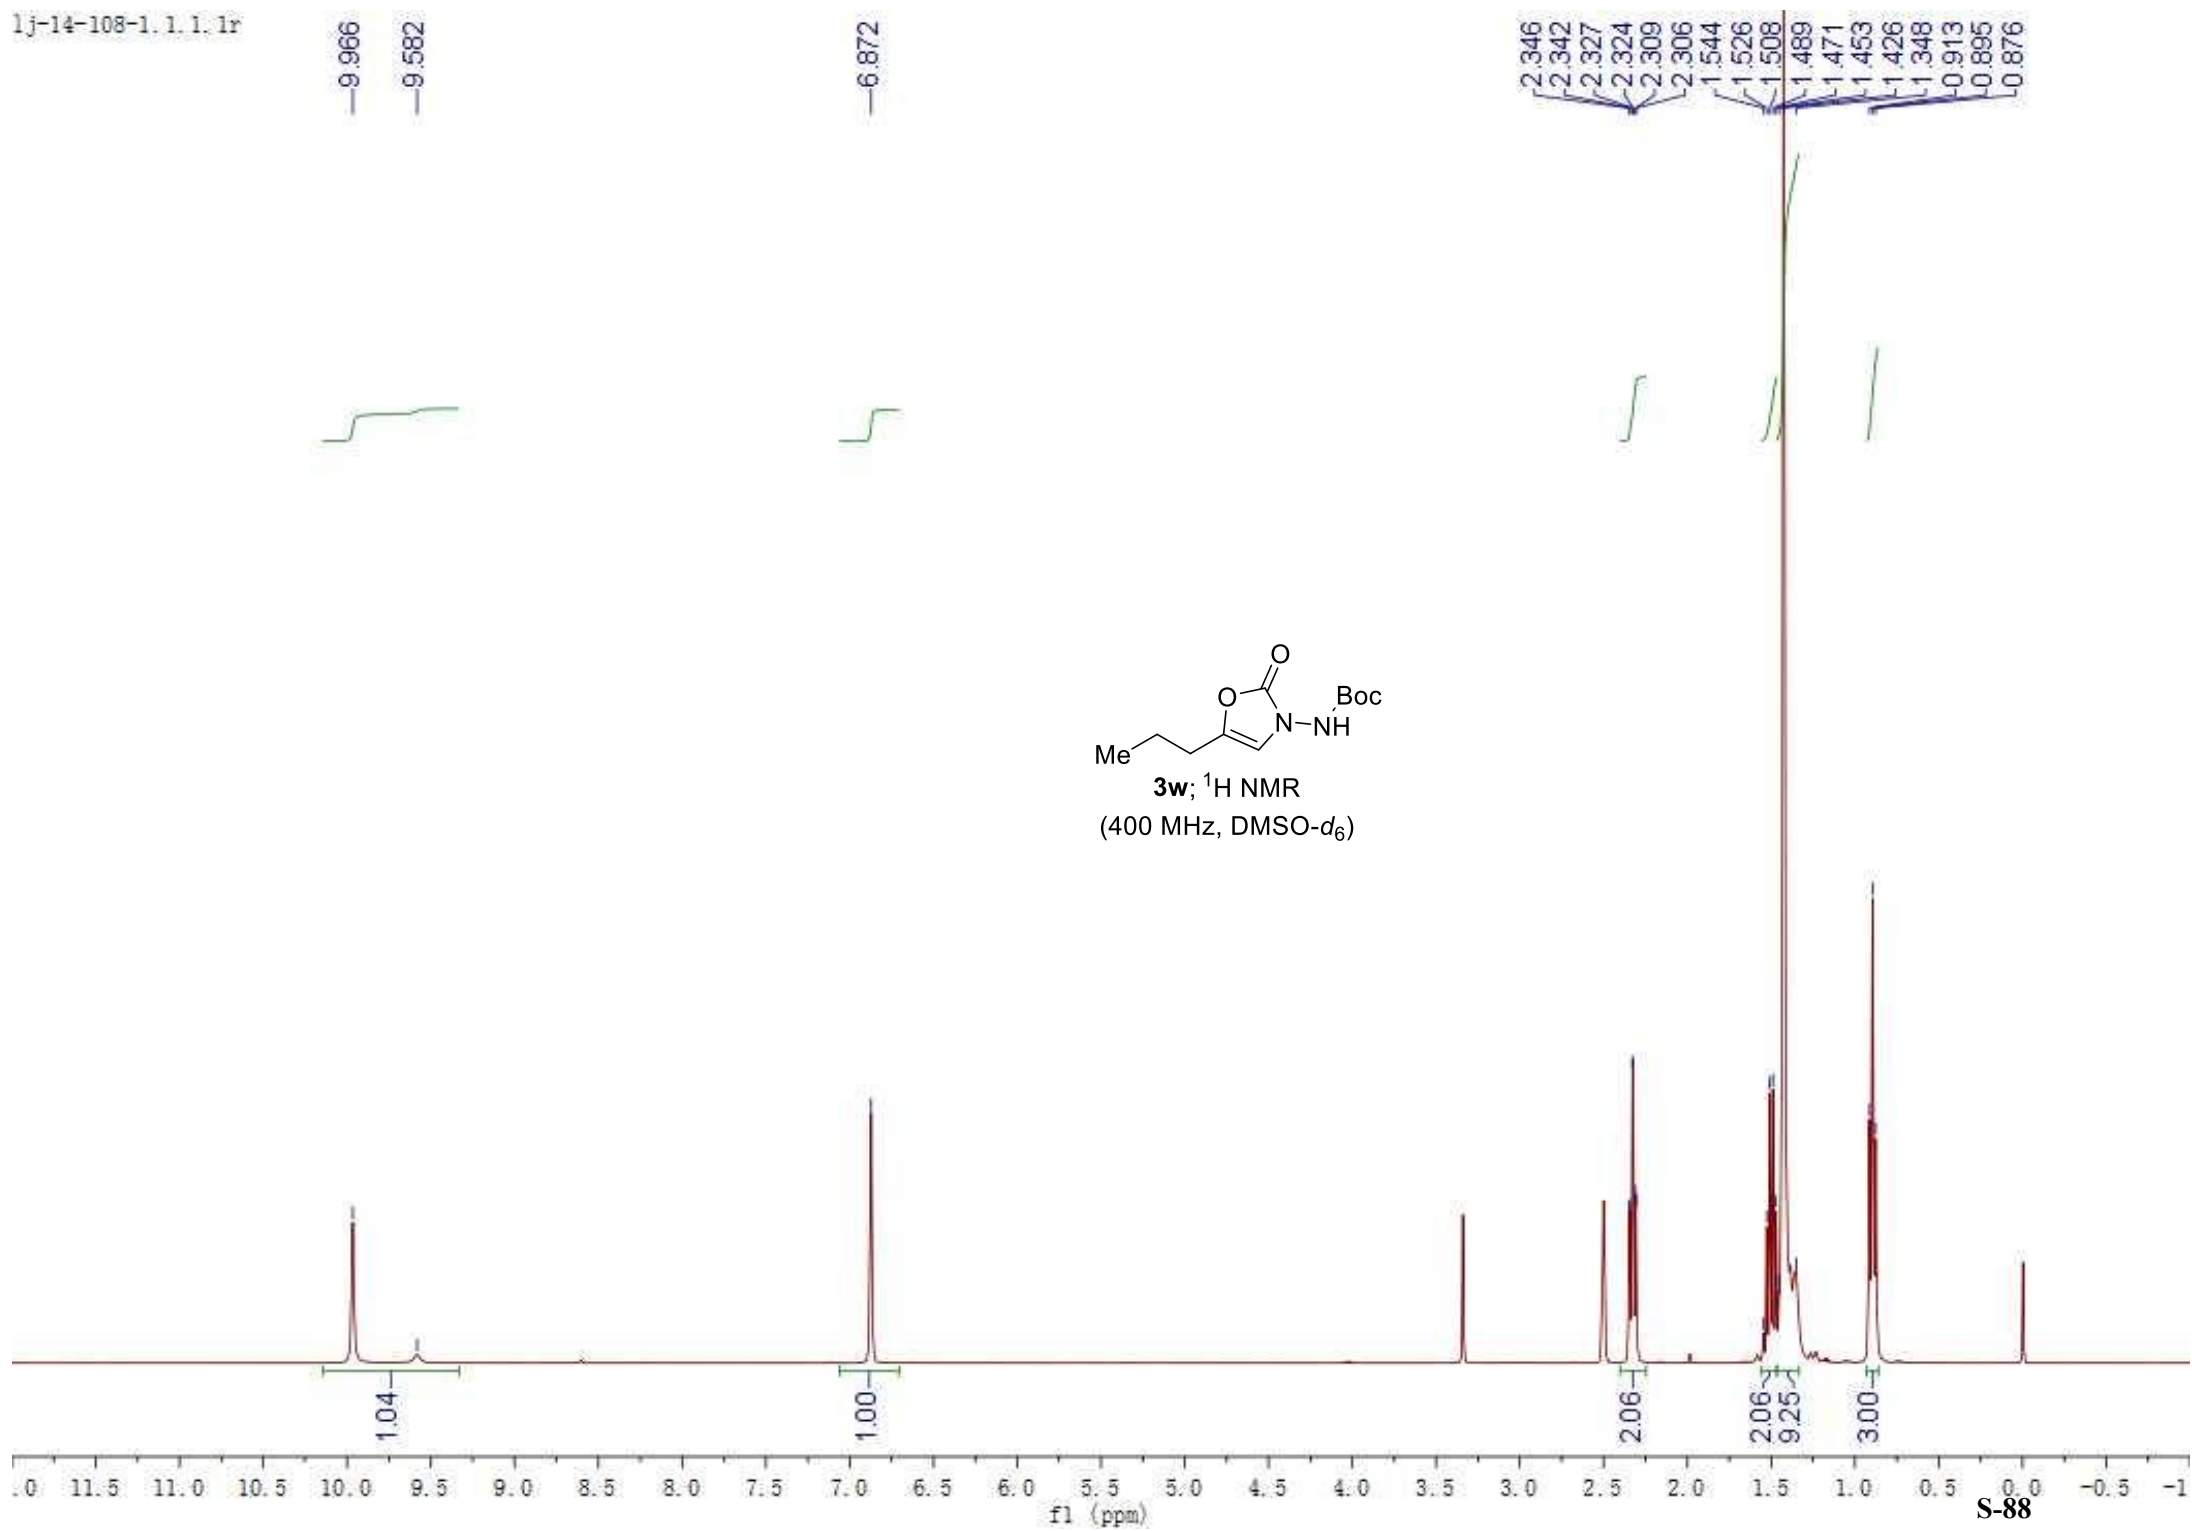

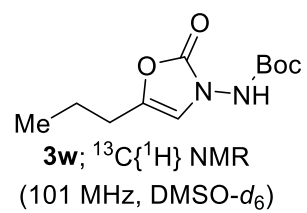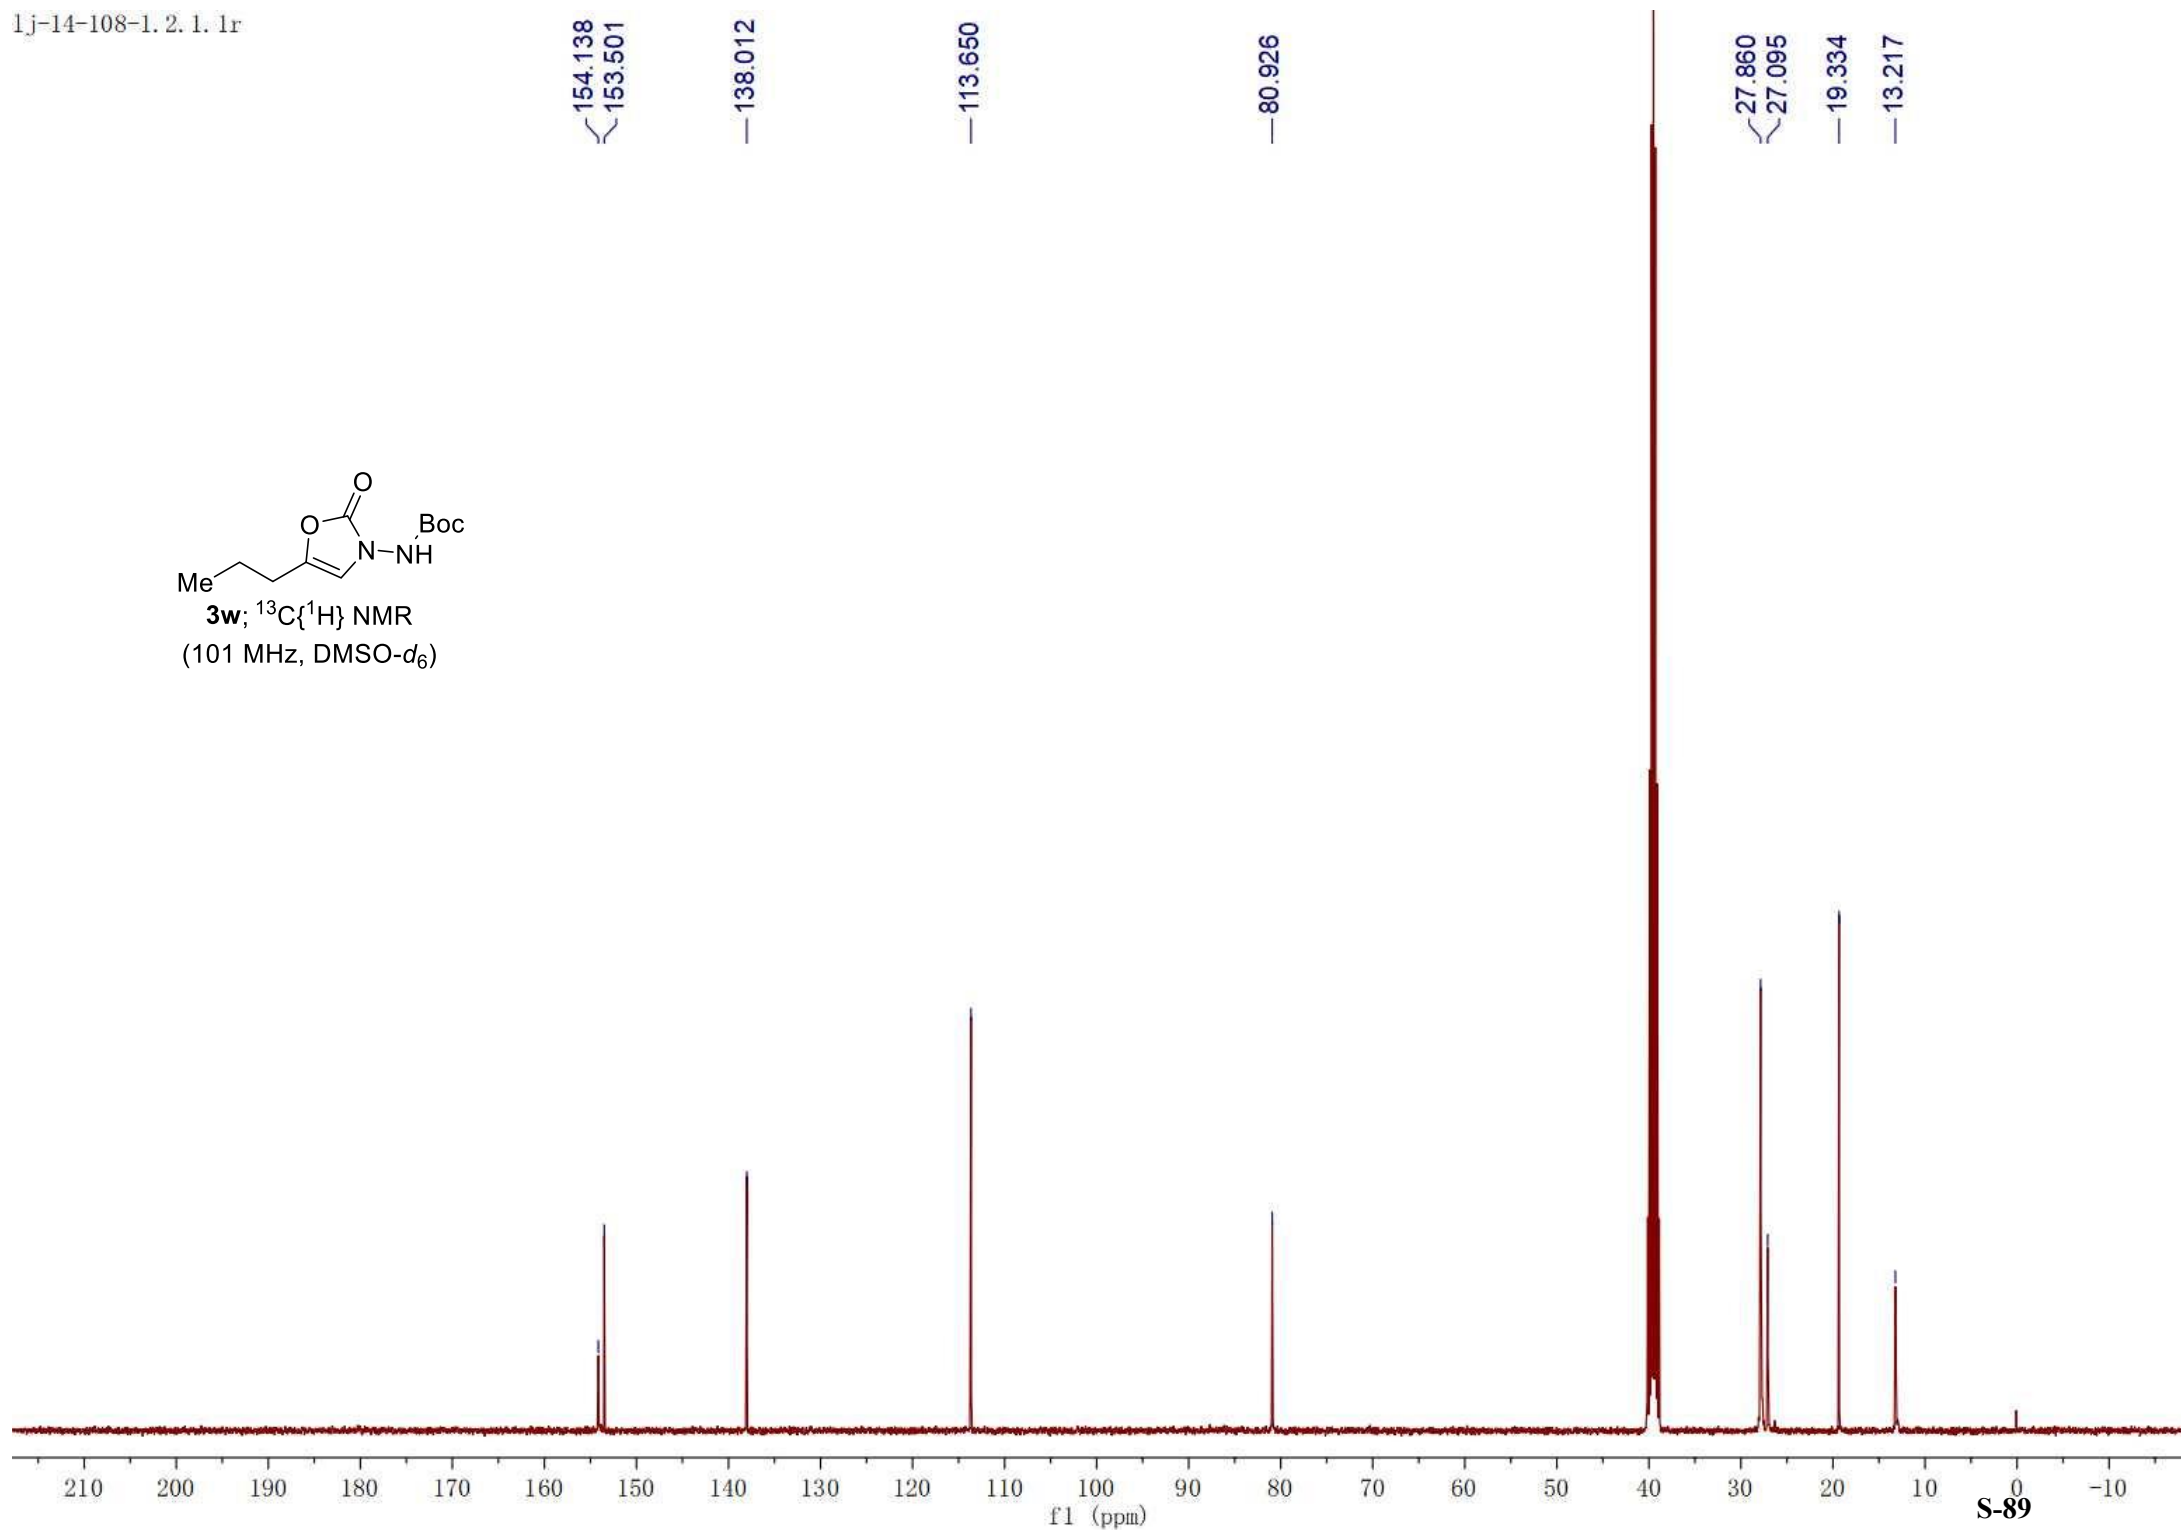

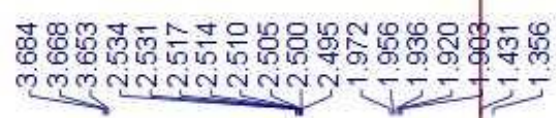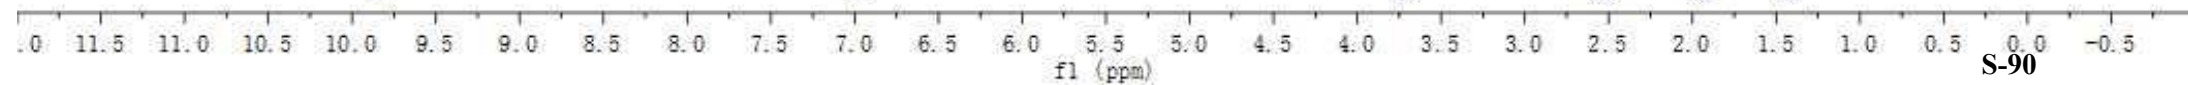

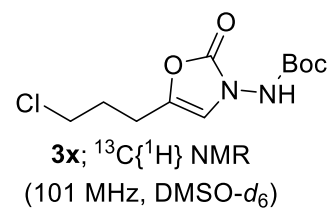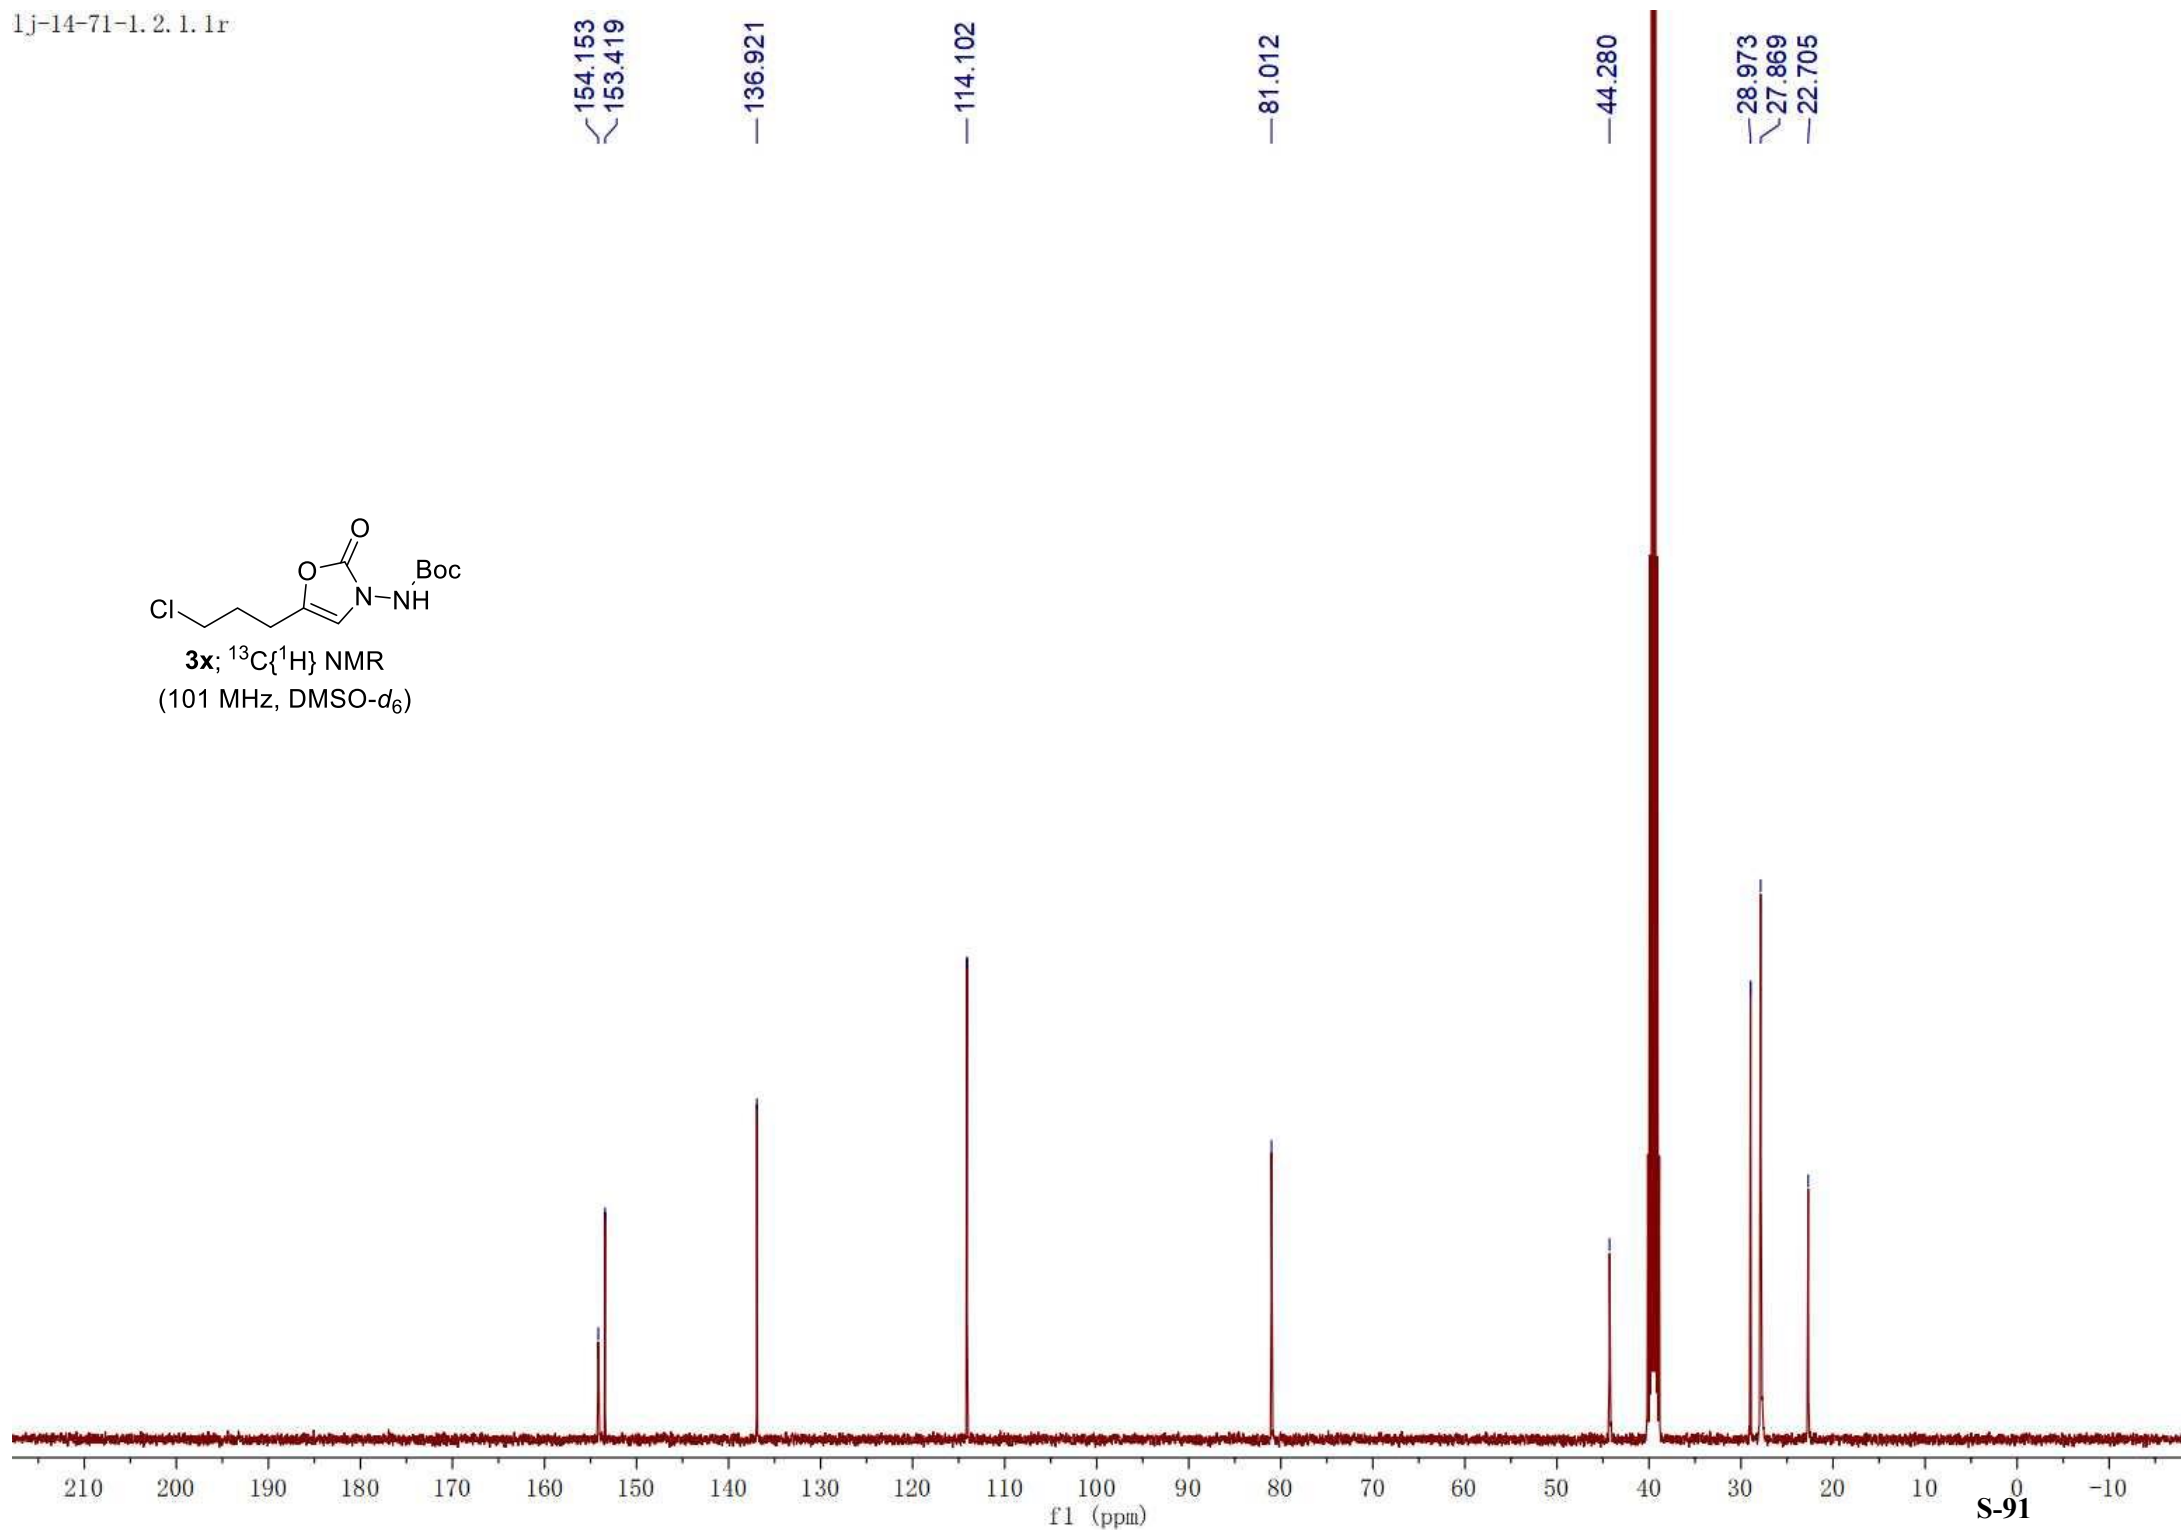

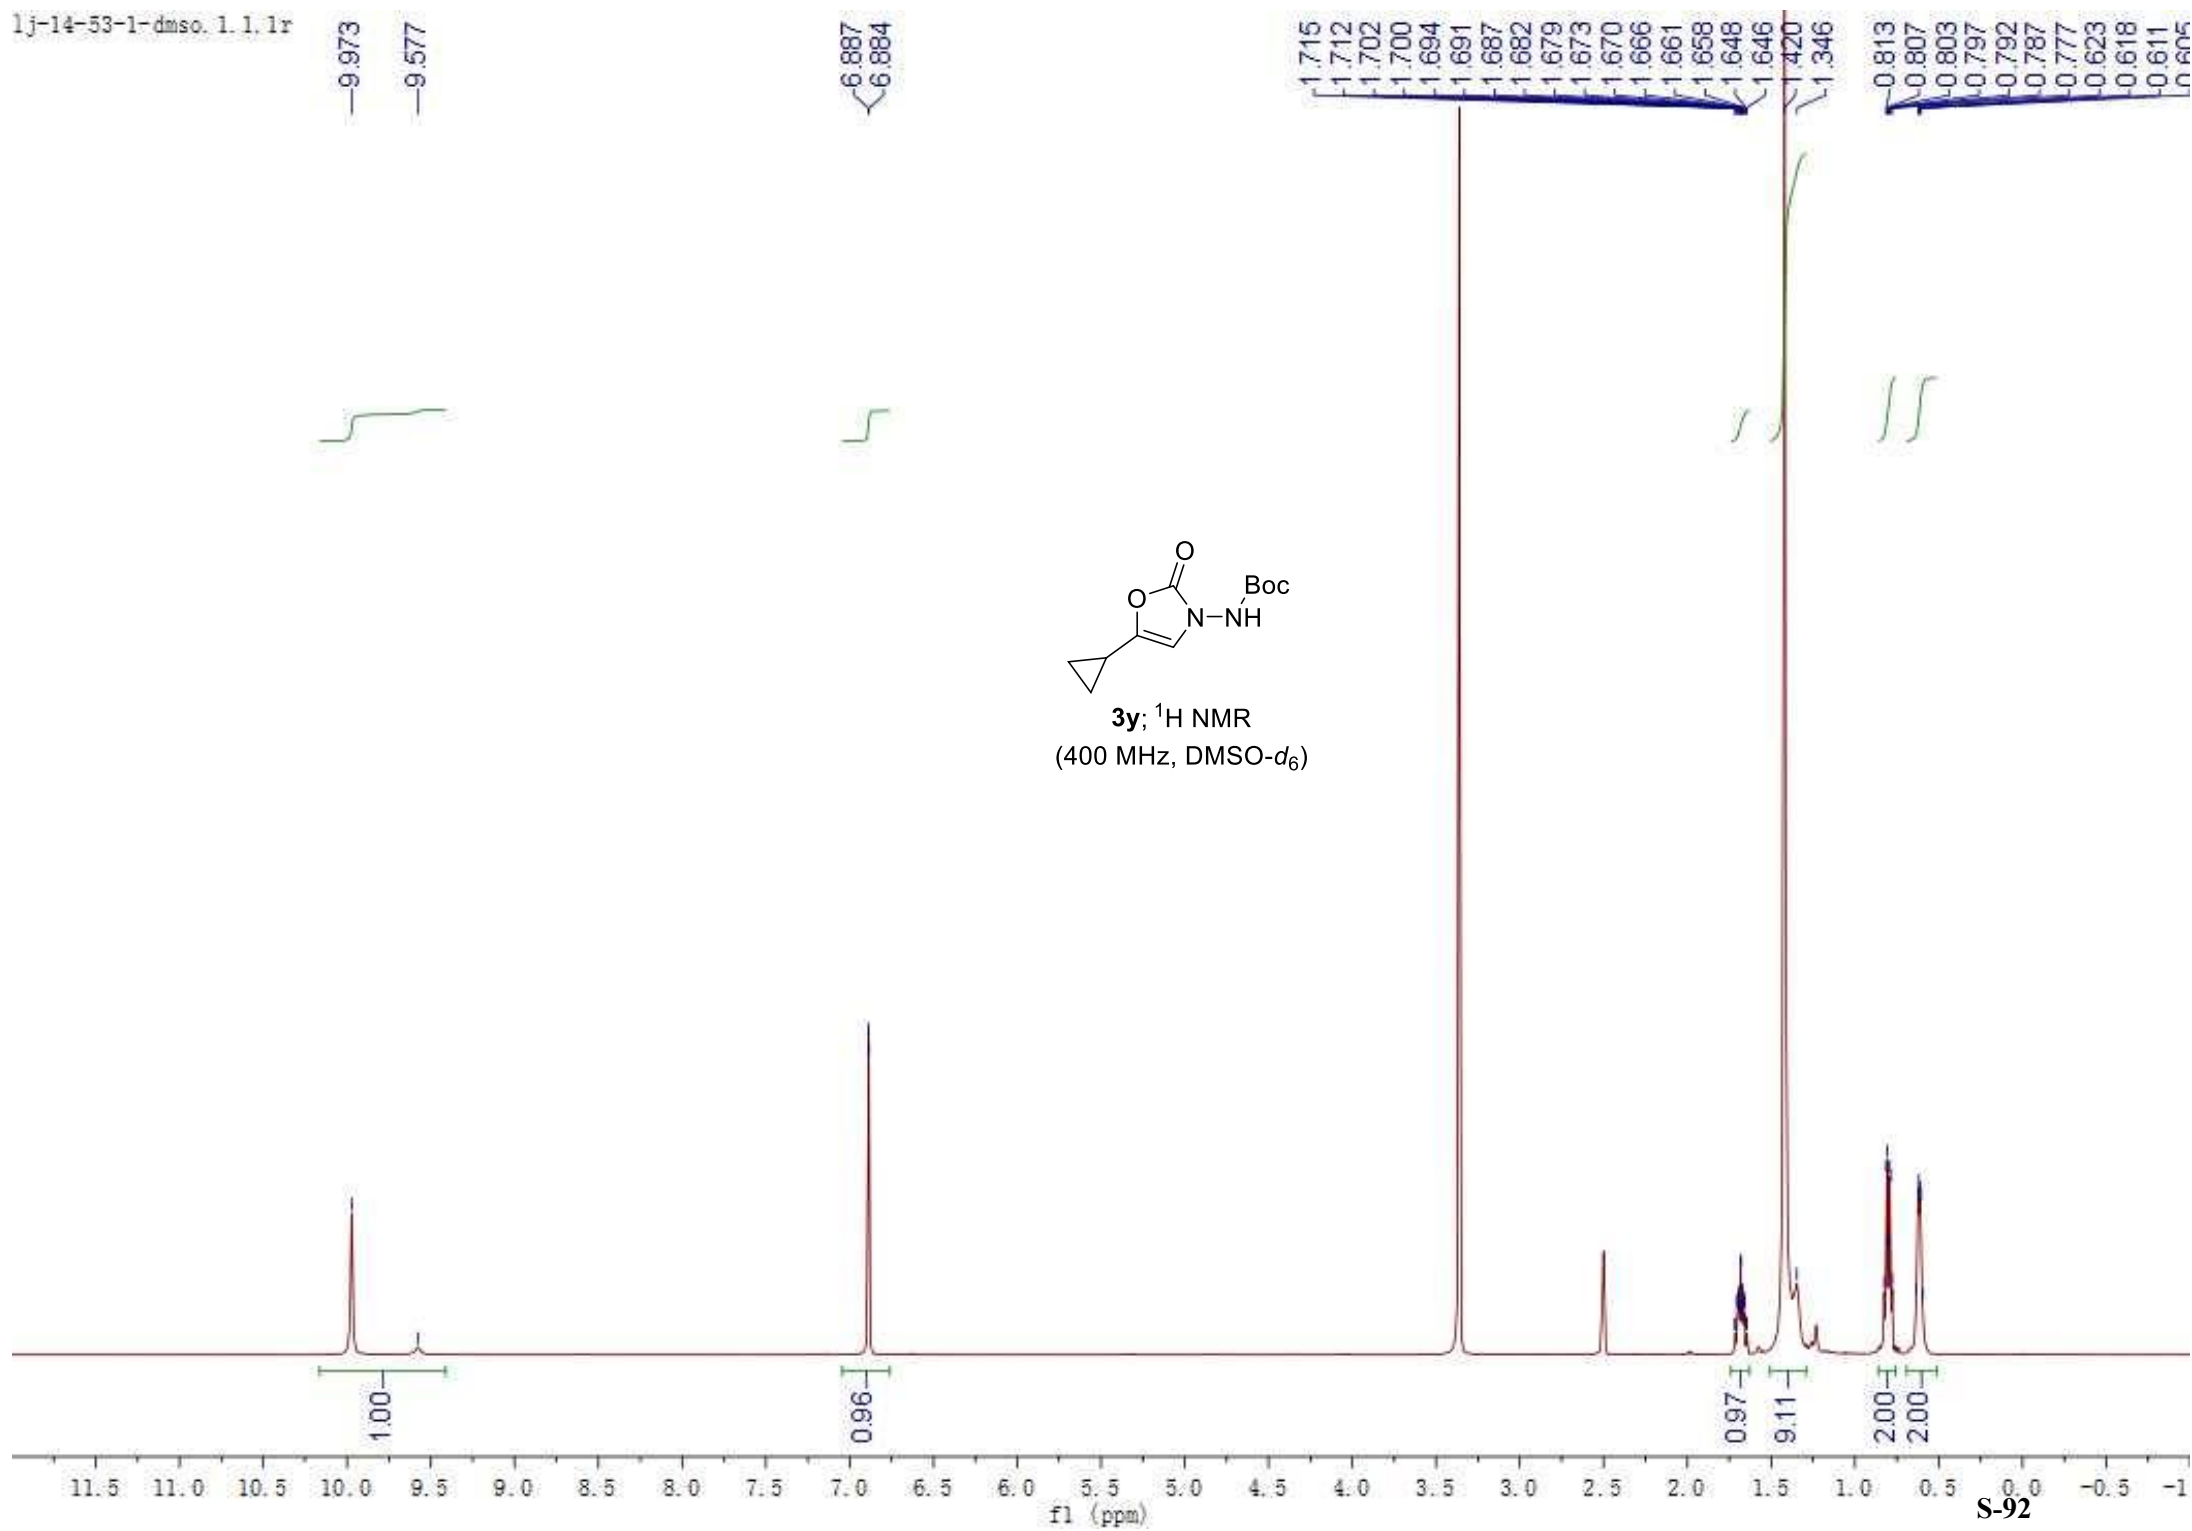



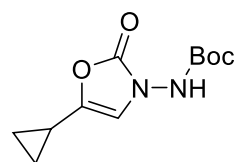

**3y**;  $^{13}\text{C}\{^1\text{H}\}$  NMR  
(101 MHz, DMSO- $d_6$ )

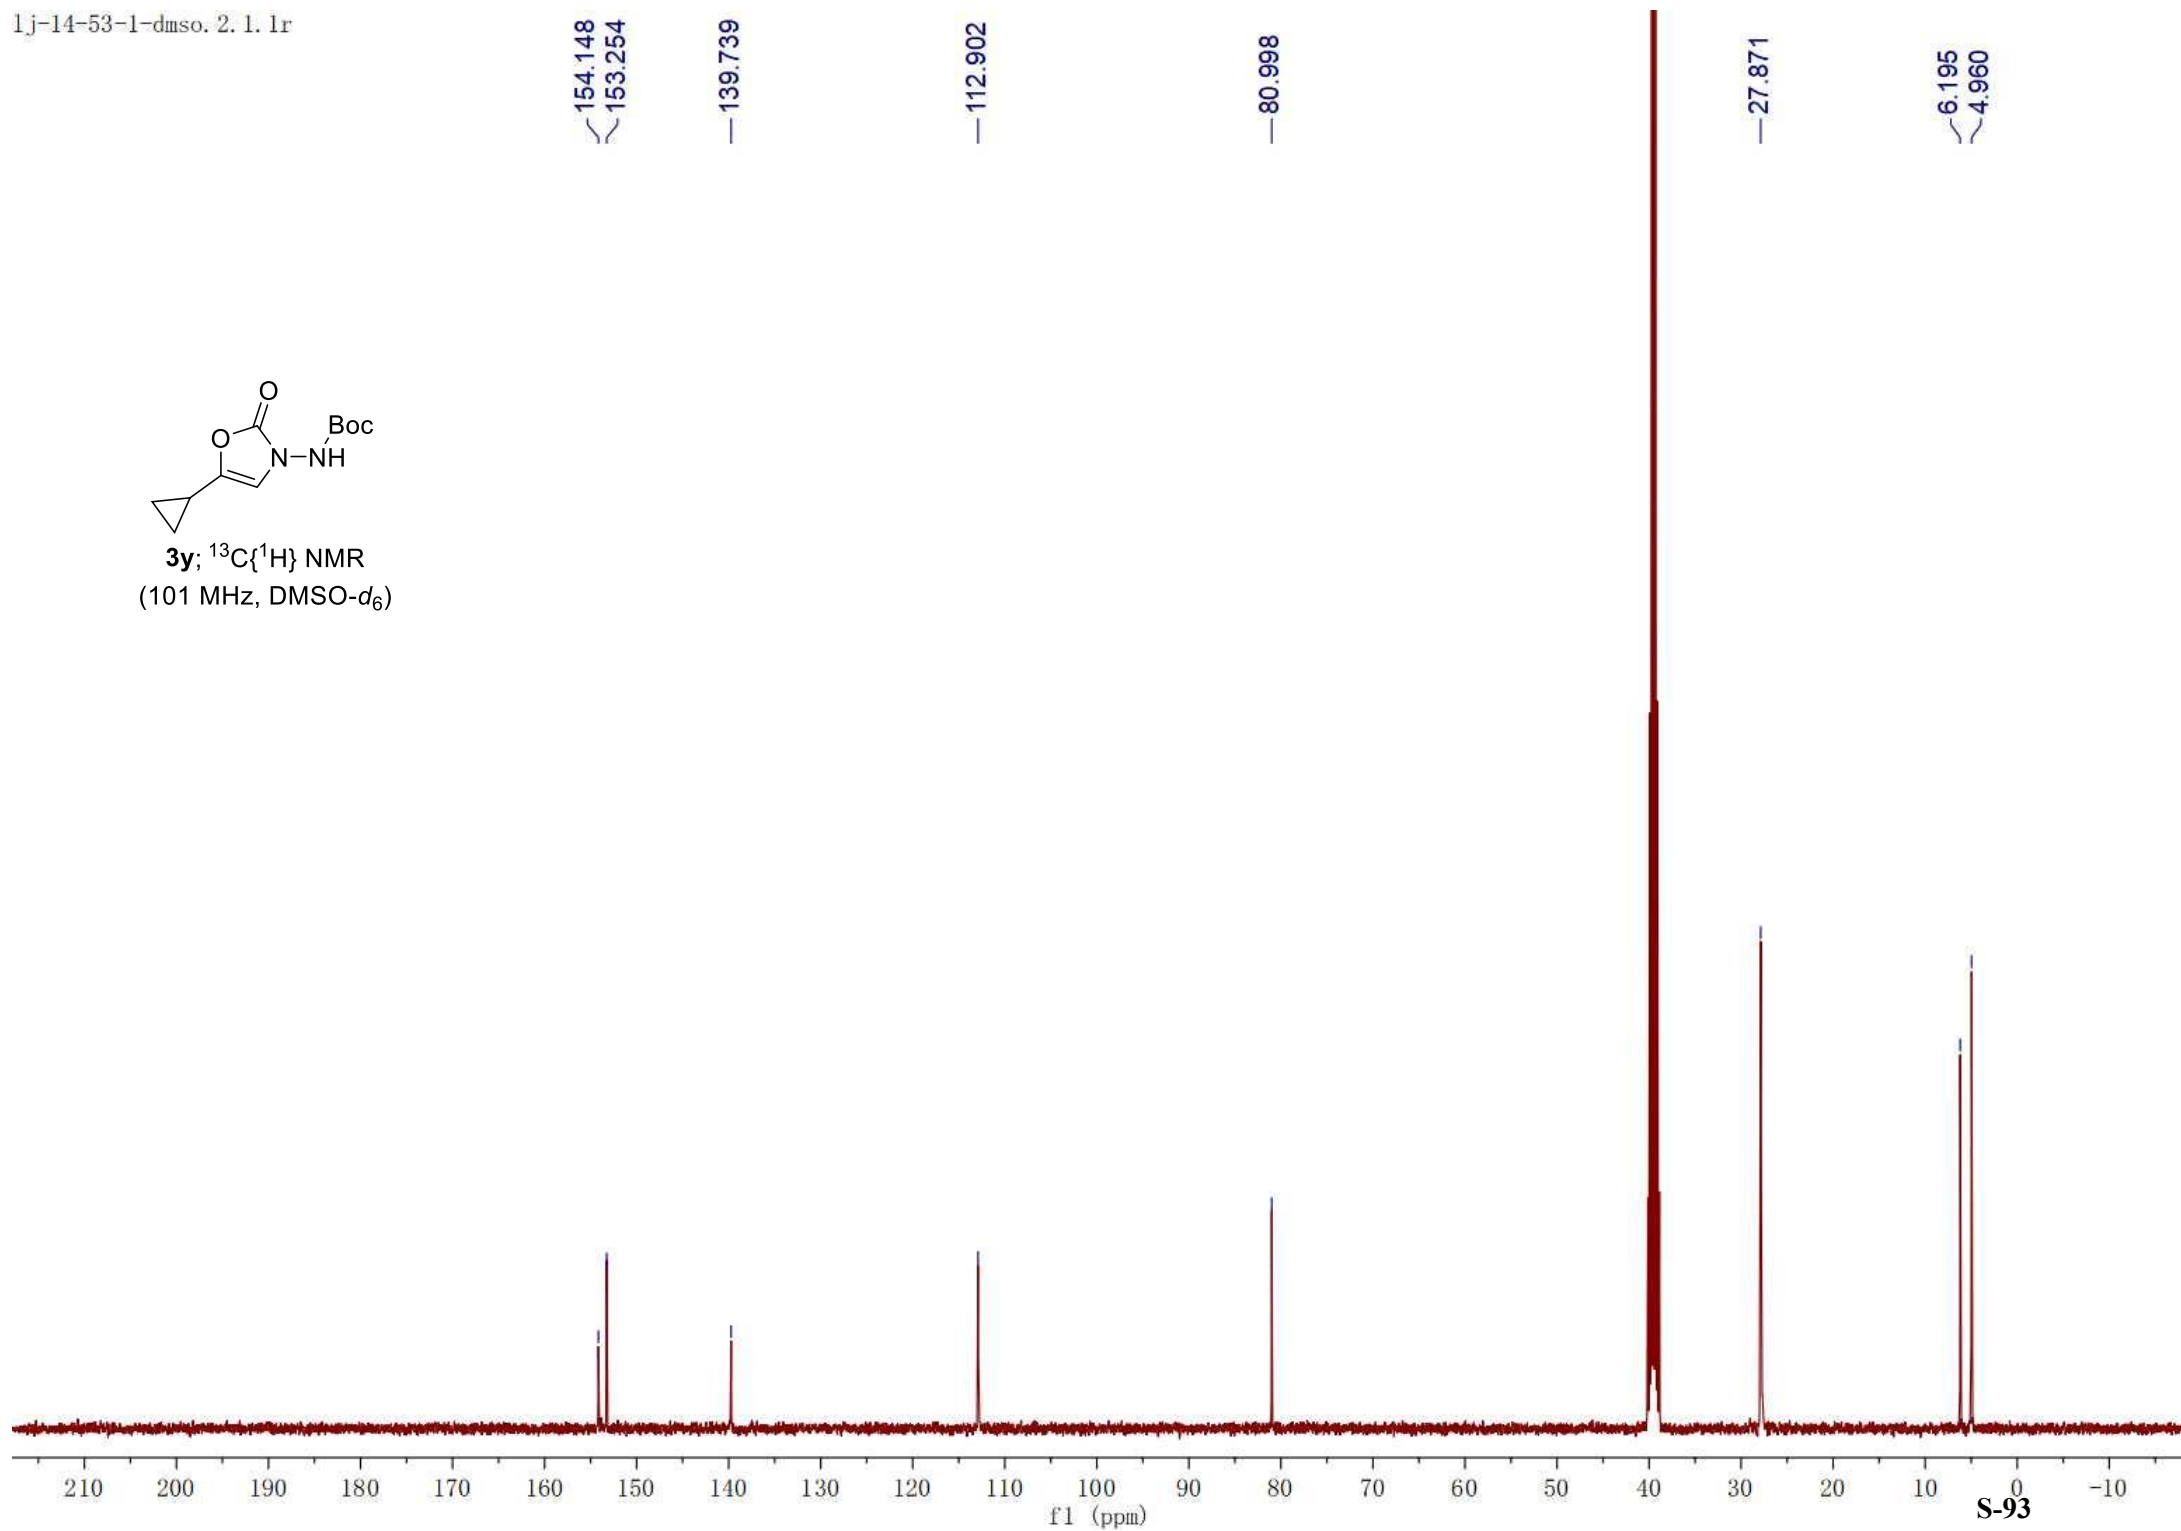

9.972  
9.605

6.843

1.429  
1.344  
1.197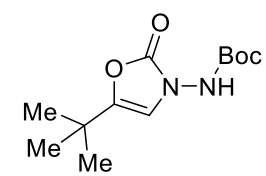

**3z**;  $^1\text{H}$  NMR  
(400 MHz,  $\text{DMSO}-d_6$ )

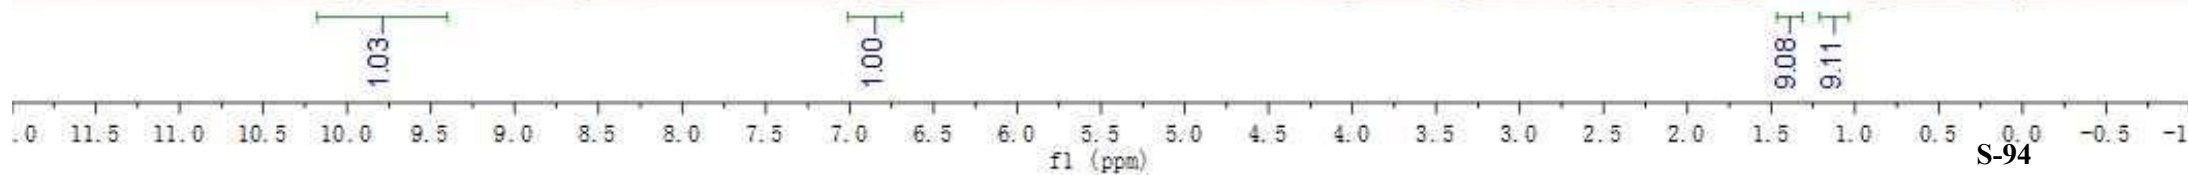

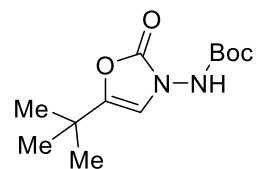

**3z**;  $^{13}\text{C}\{^1\text{H}\}$  NMR  
(101 MHz, DMSO- $d_6$ )

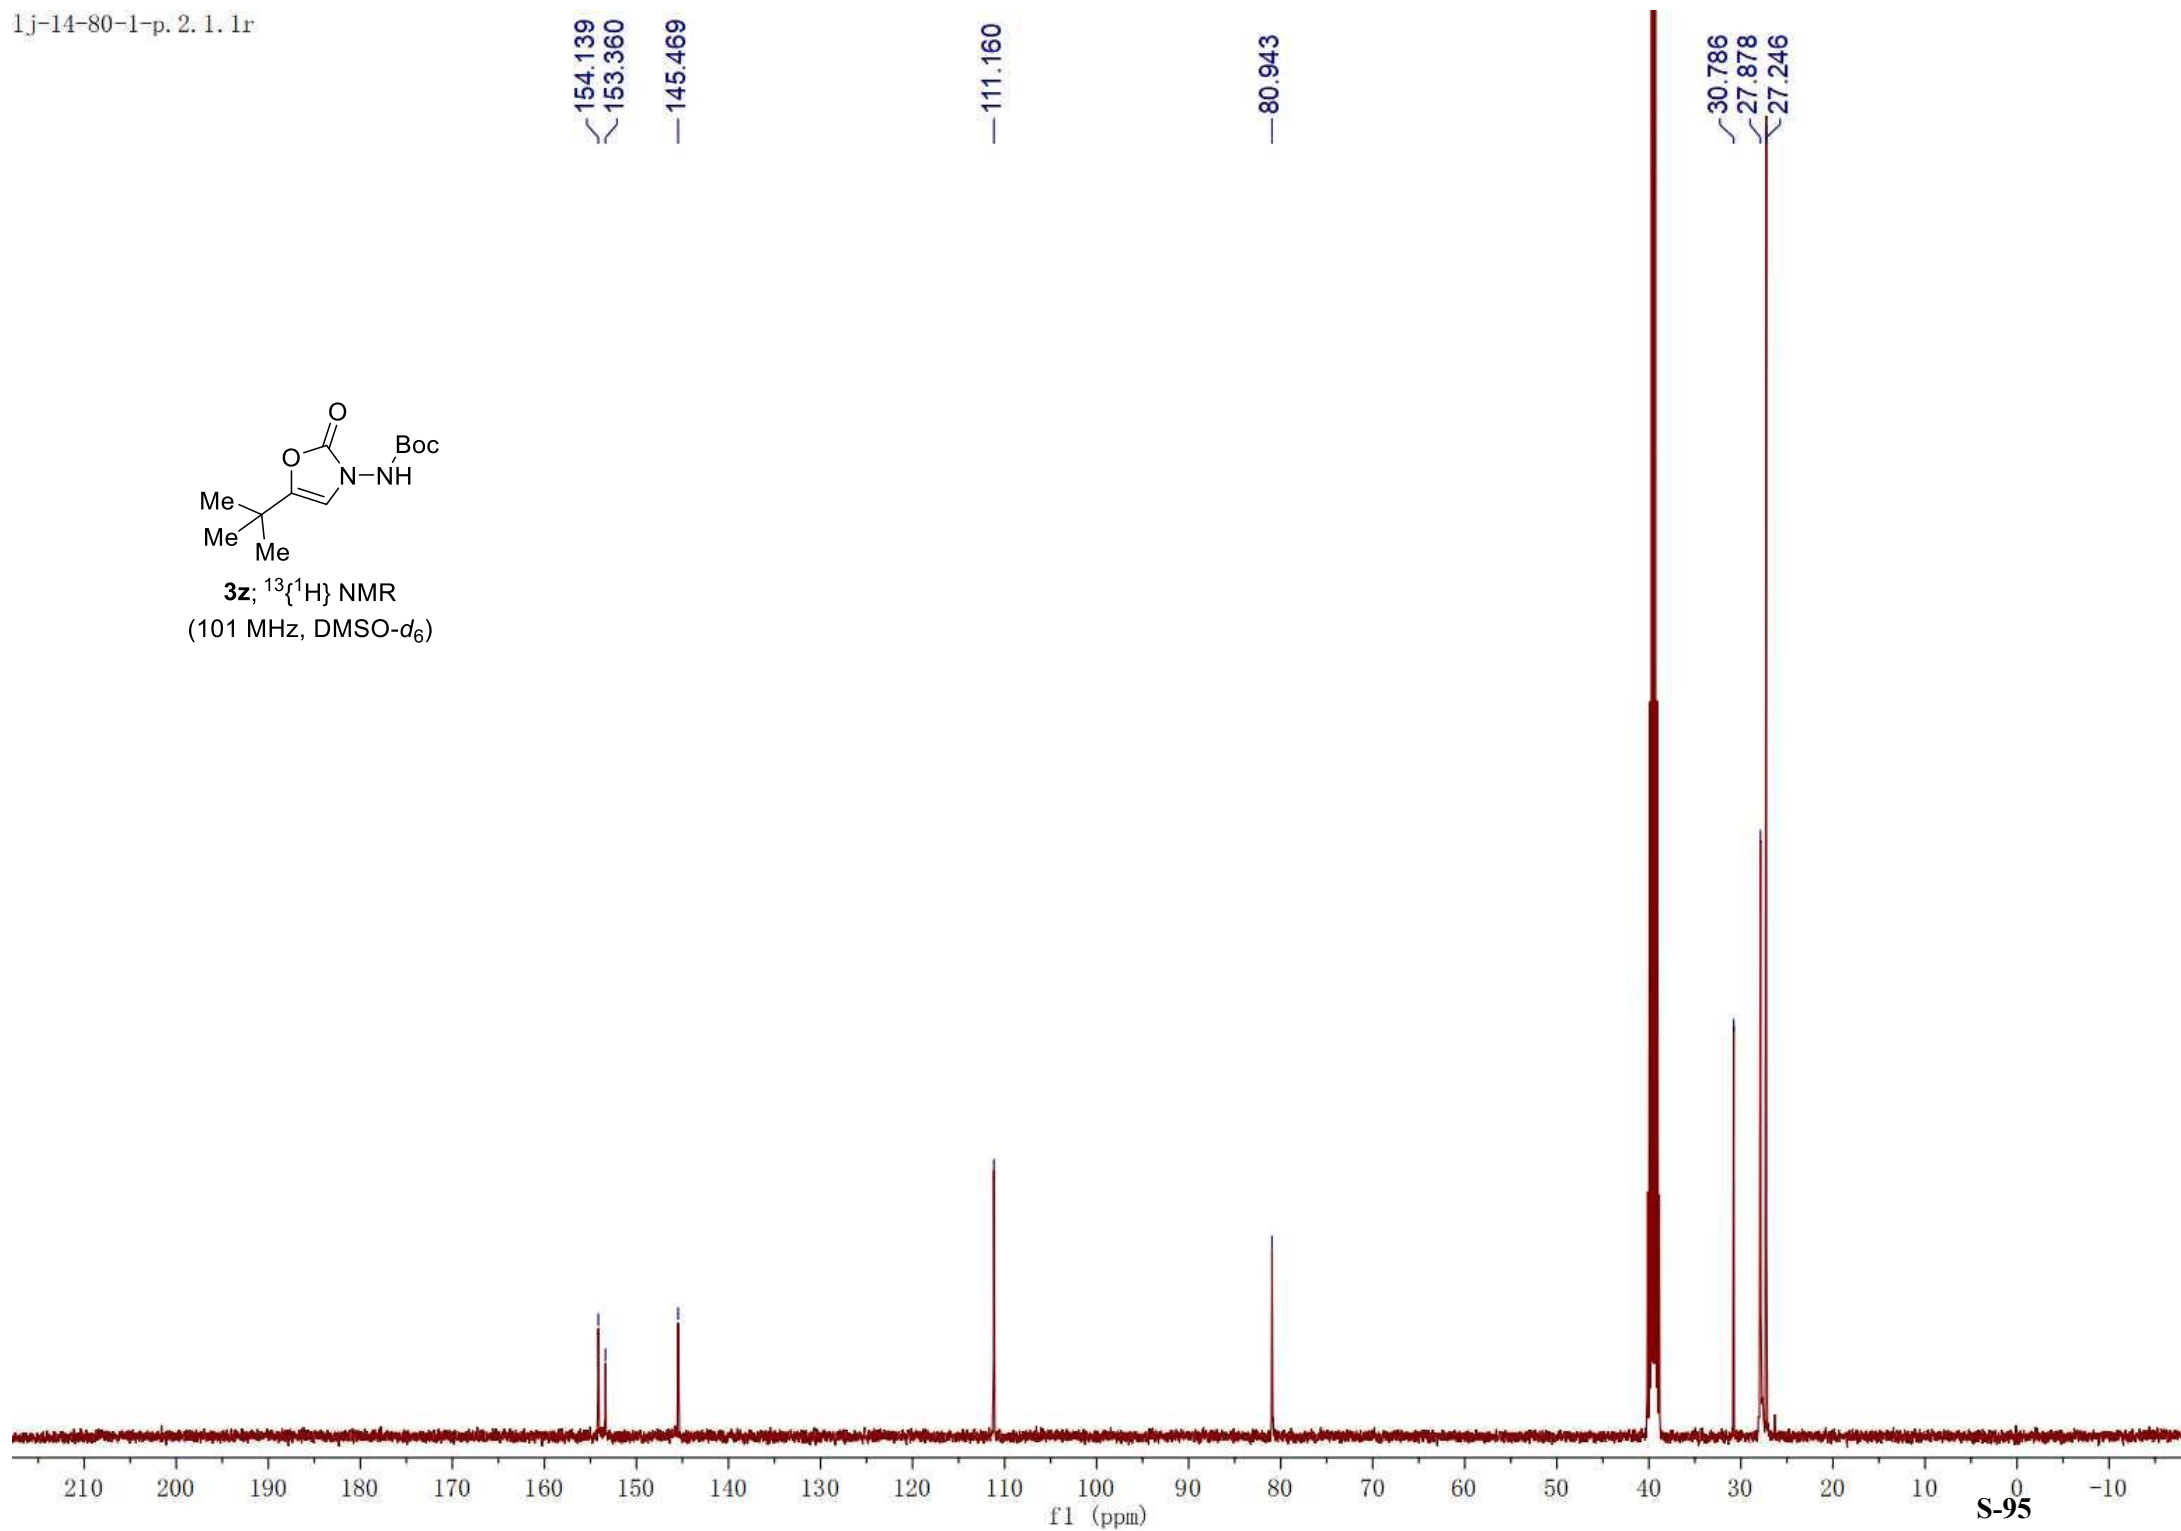

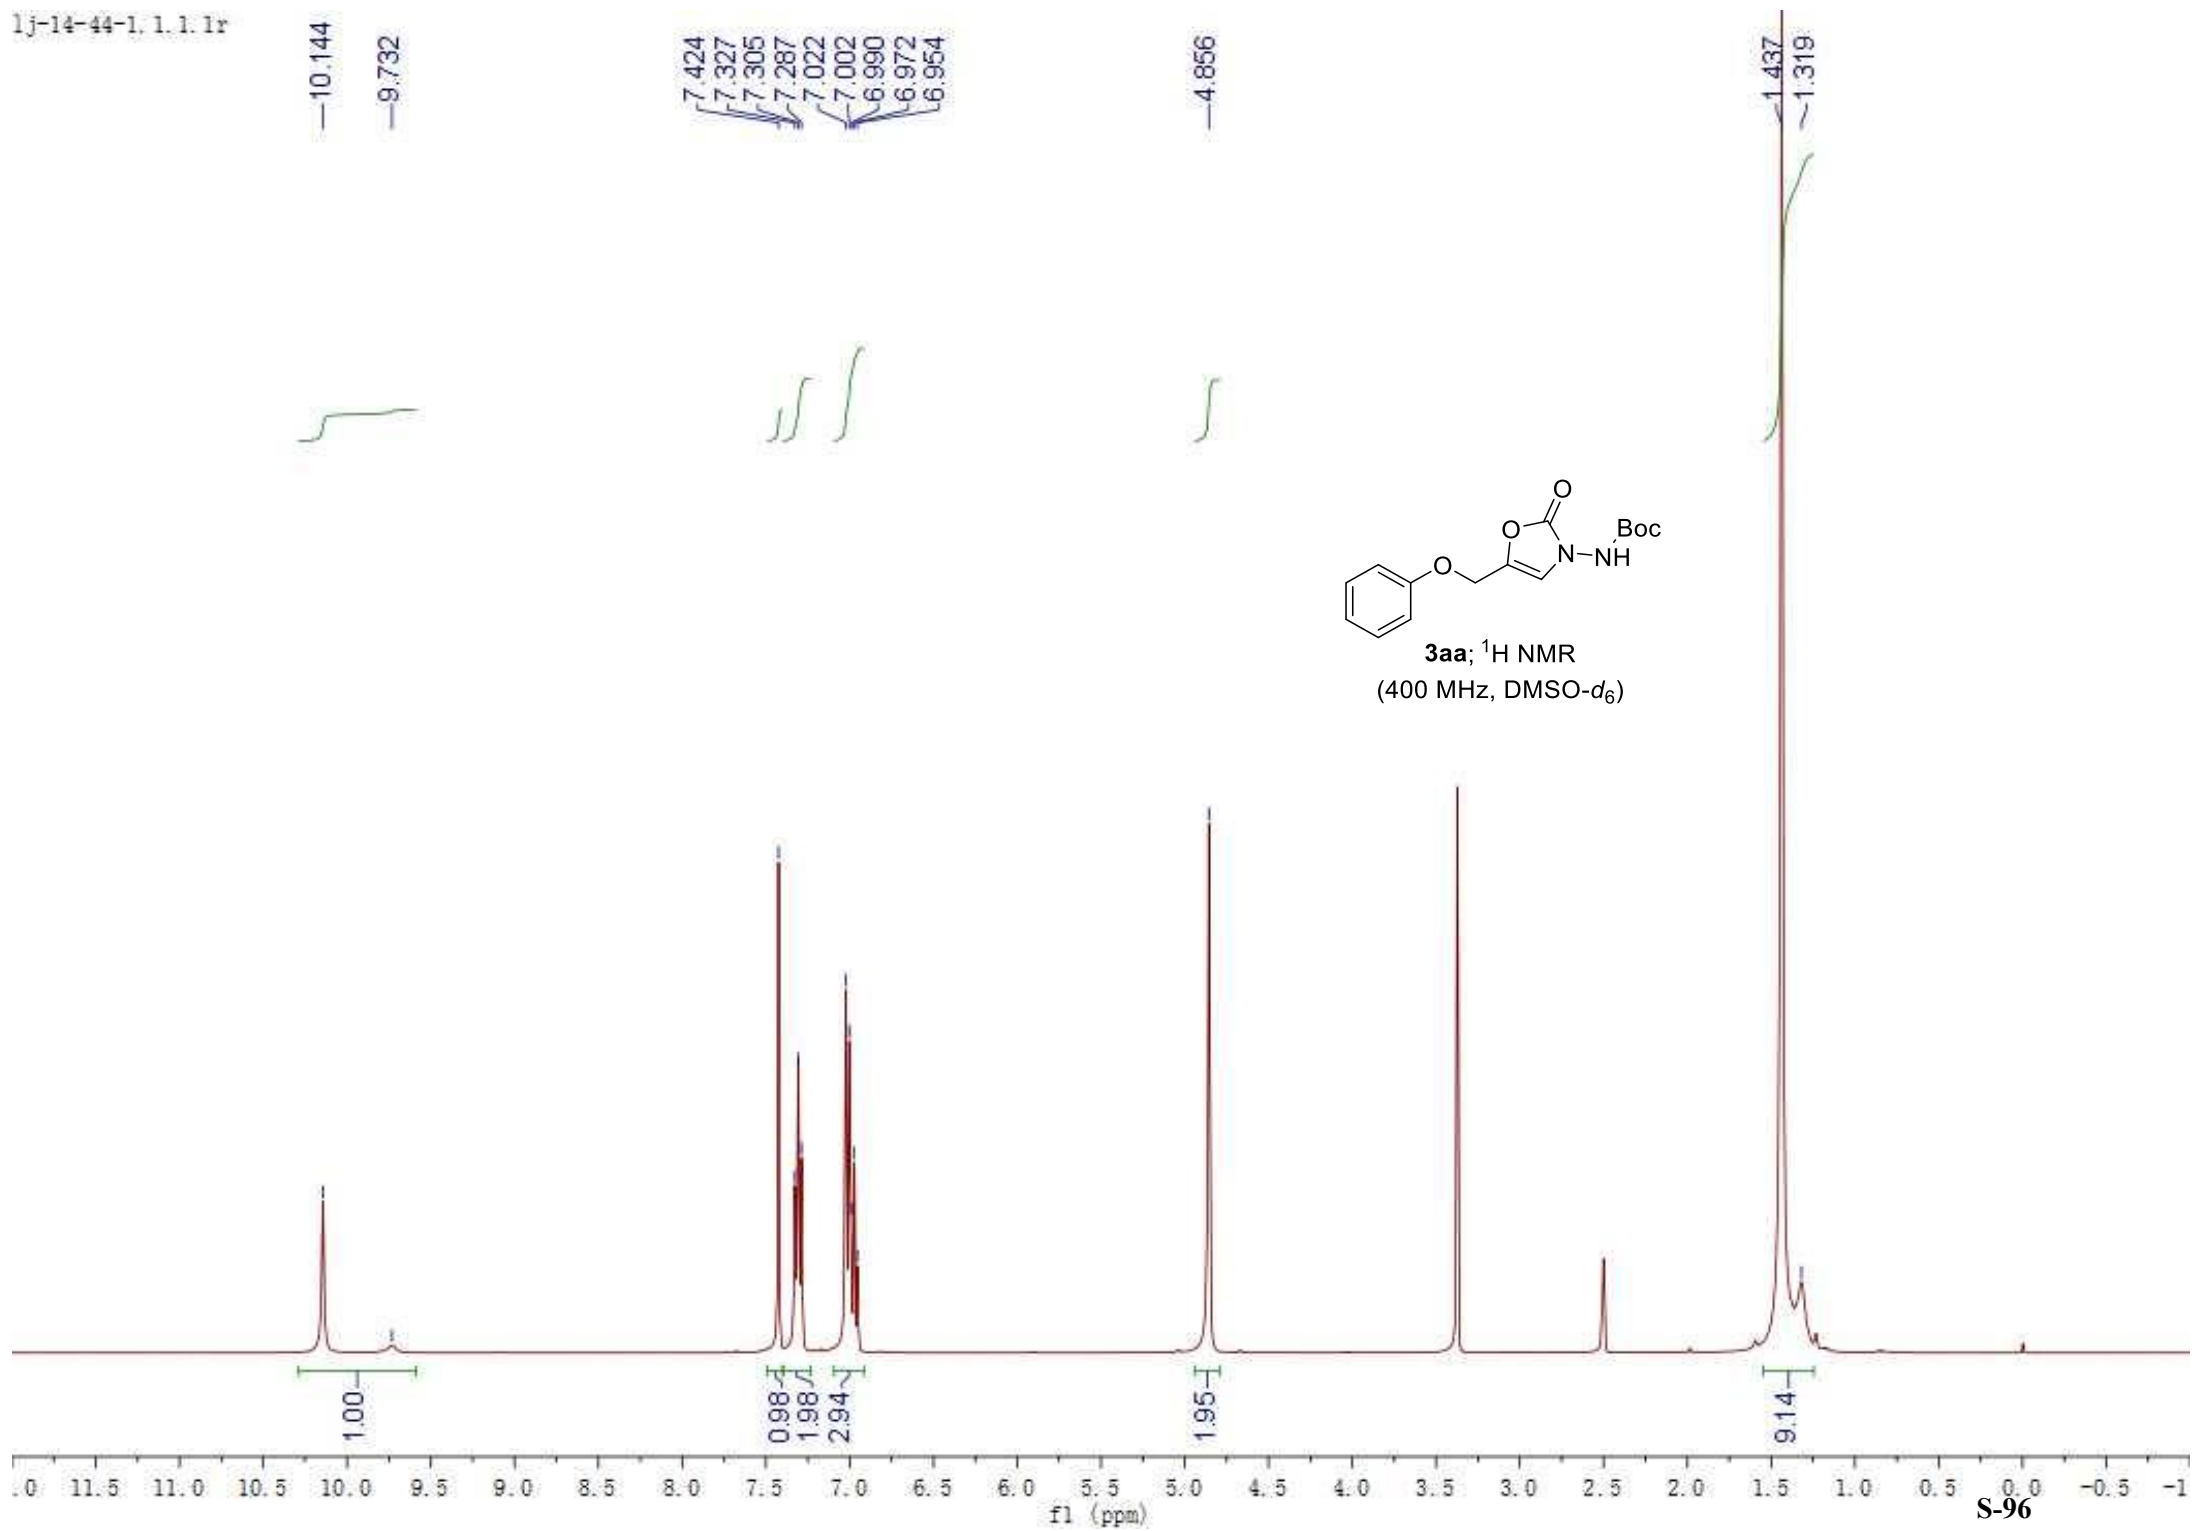

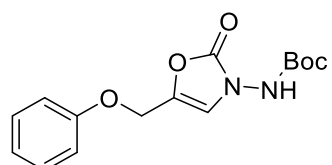

**3aa**;  $^{13}\text{C}\{^1\text{H}\}$  NMR  
(101 MHz,  $\text{DMSO}-d_6$ )

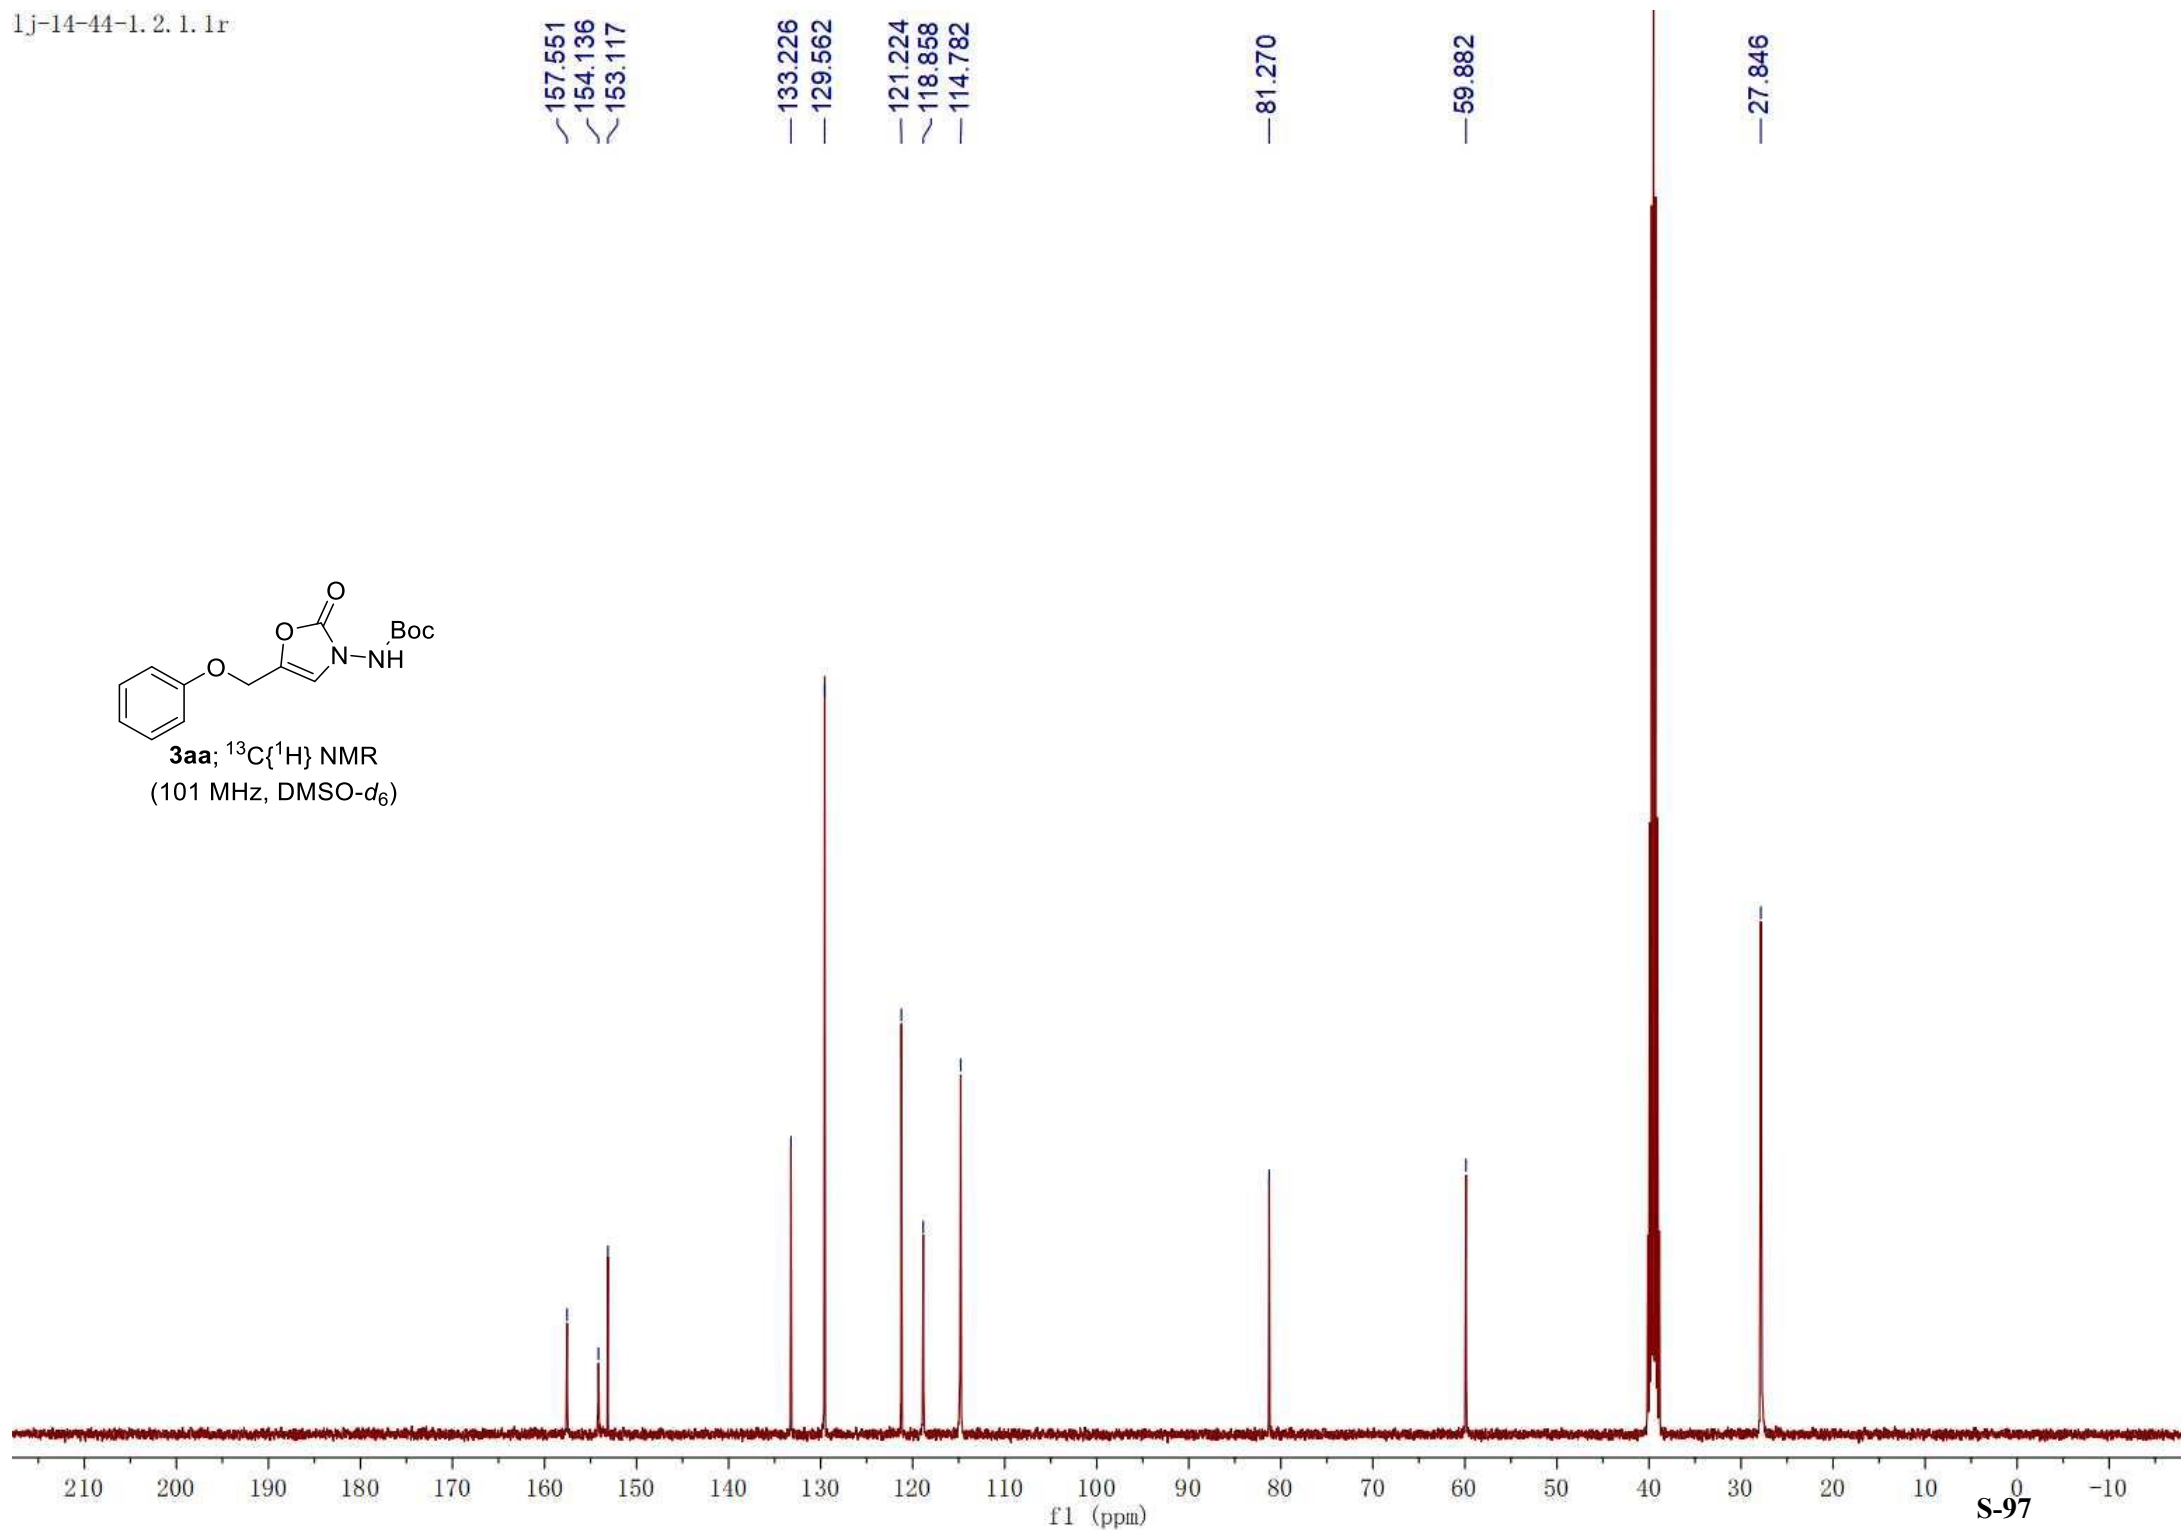

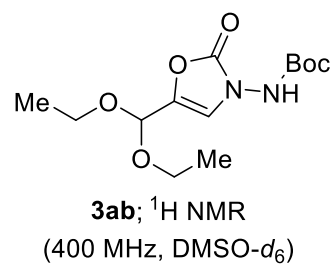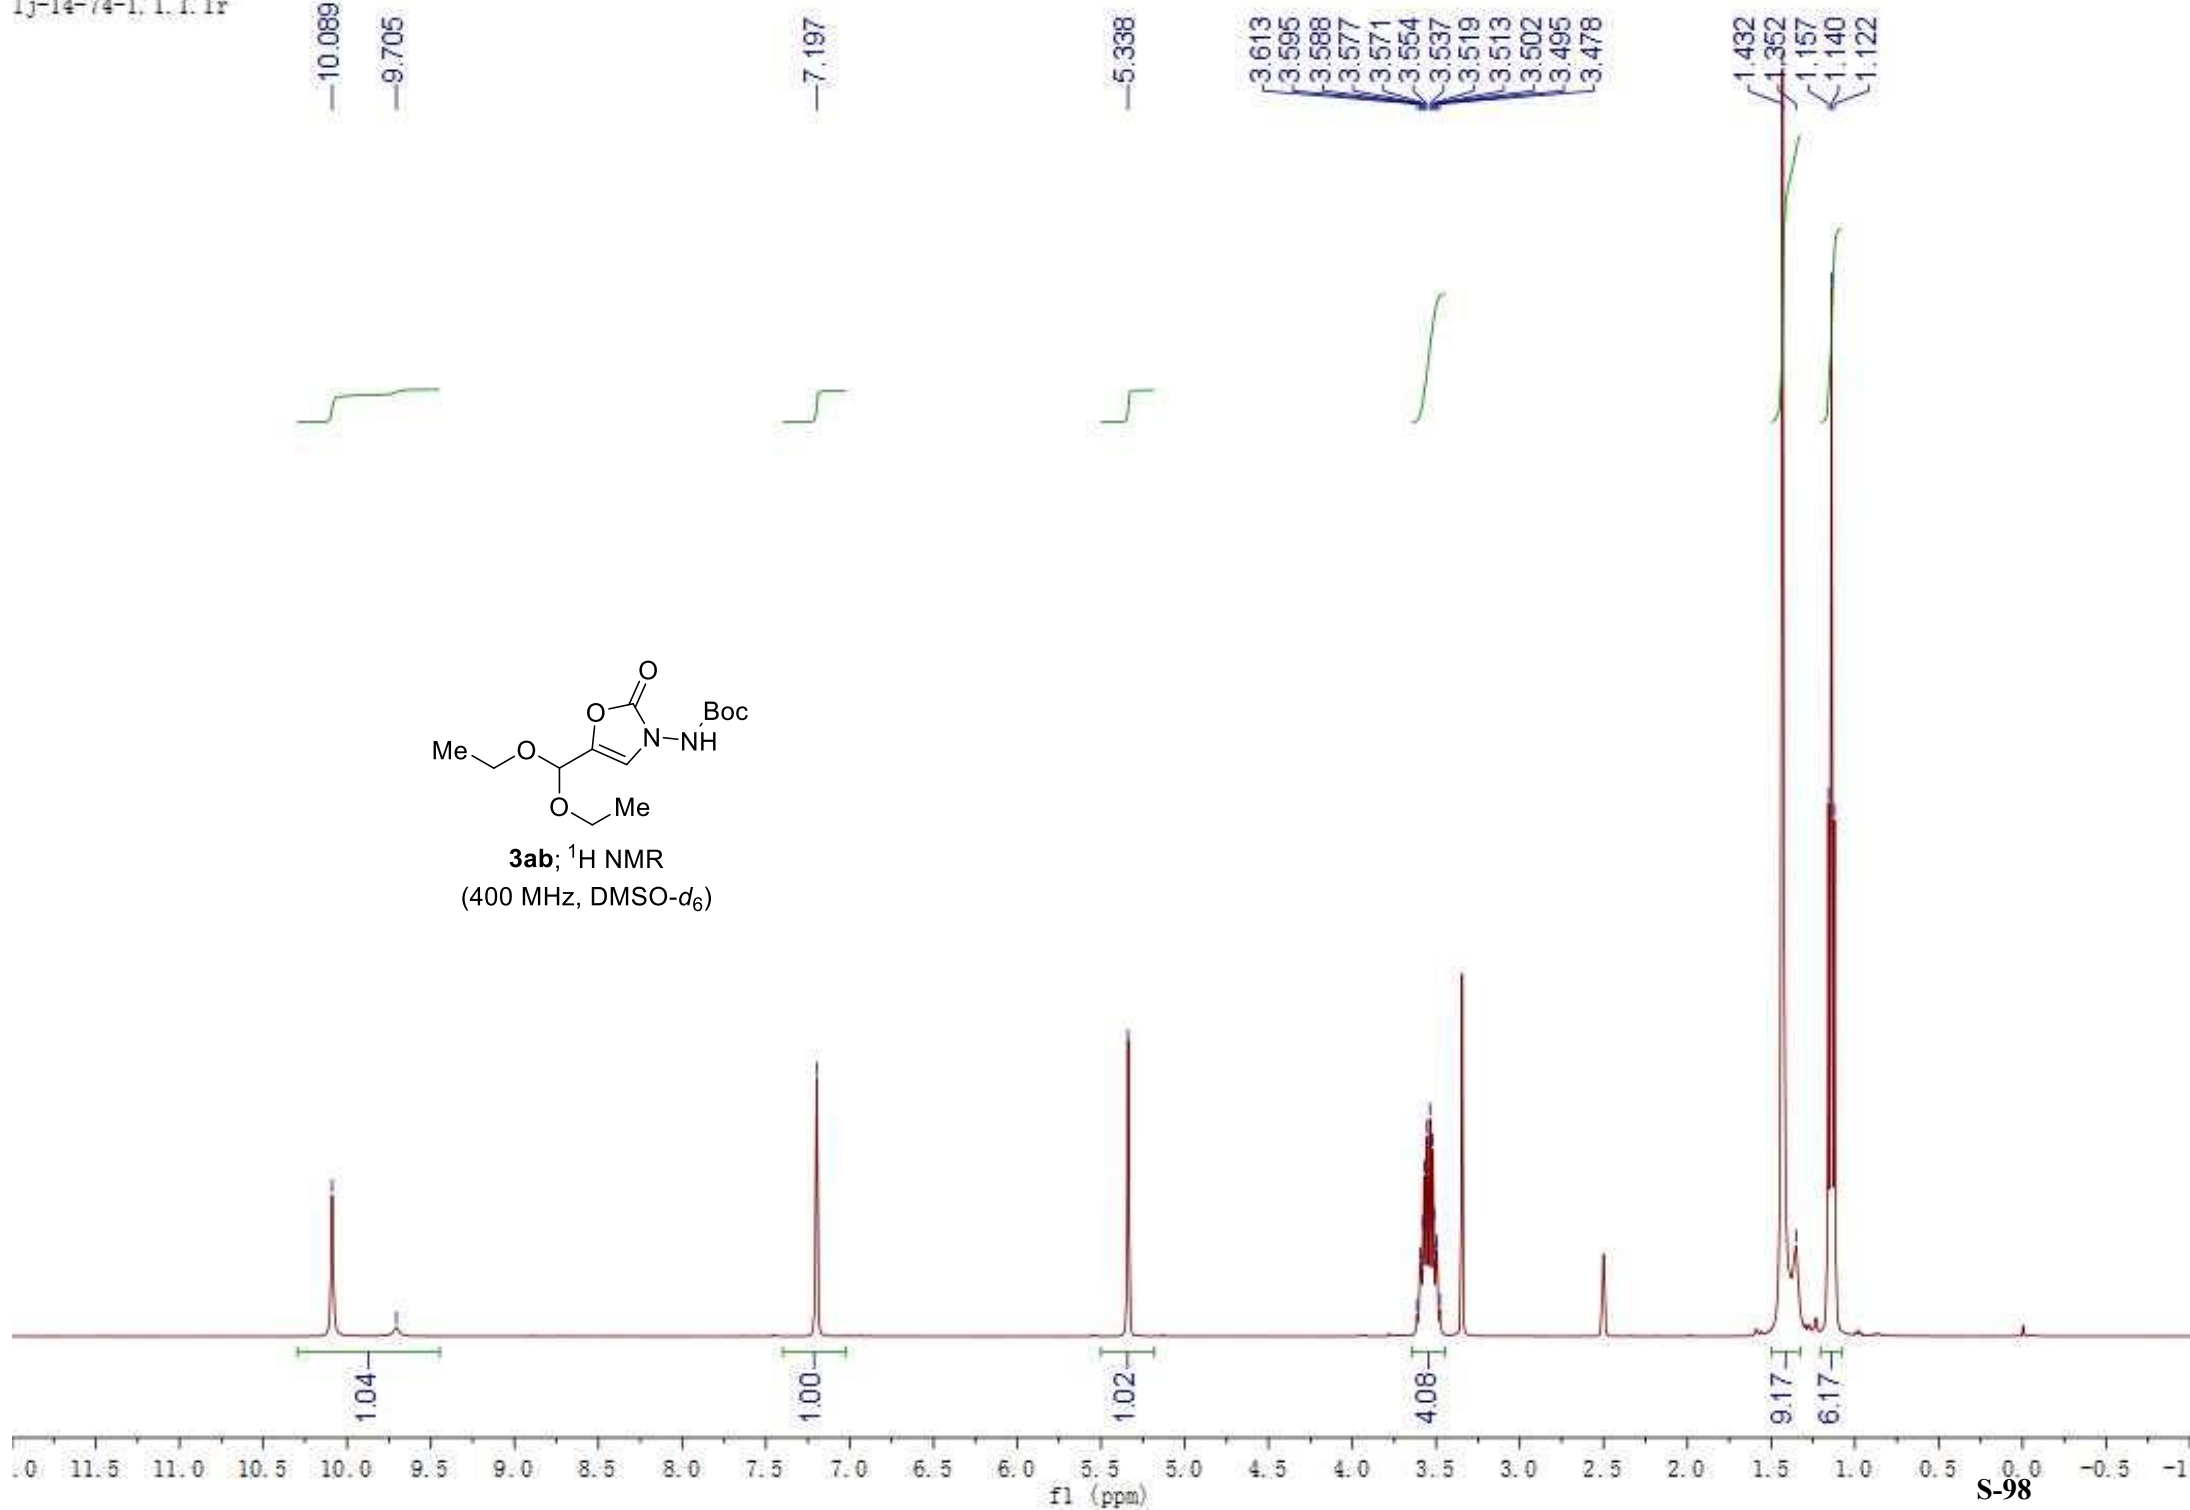

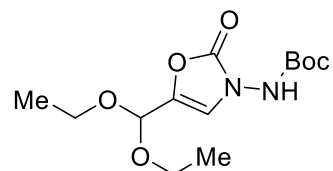

**3ab**;  $^{13}\text{C}\{^1\text{H}\}$  NMR  
(101 MHz,  $\text{DMSO}-d_6$ )

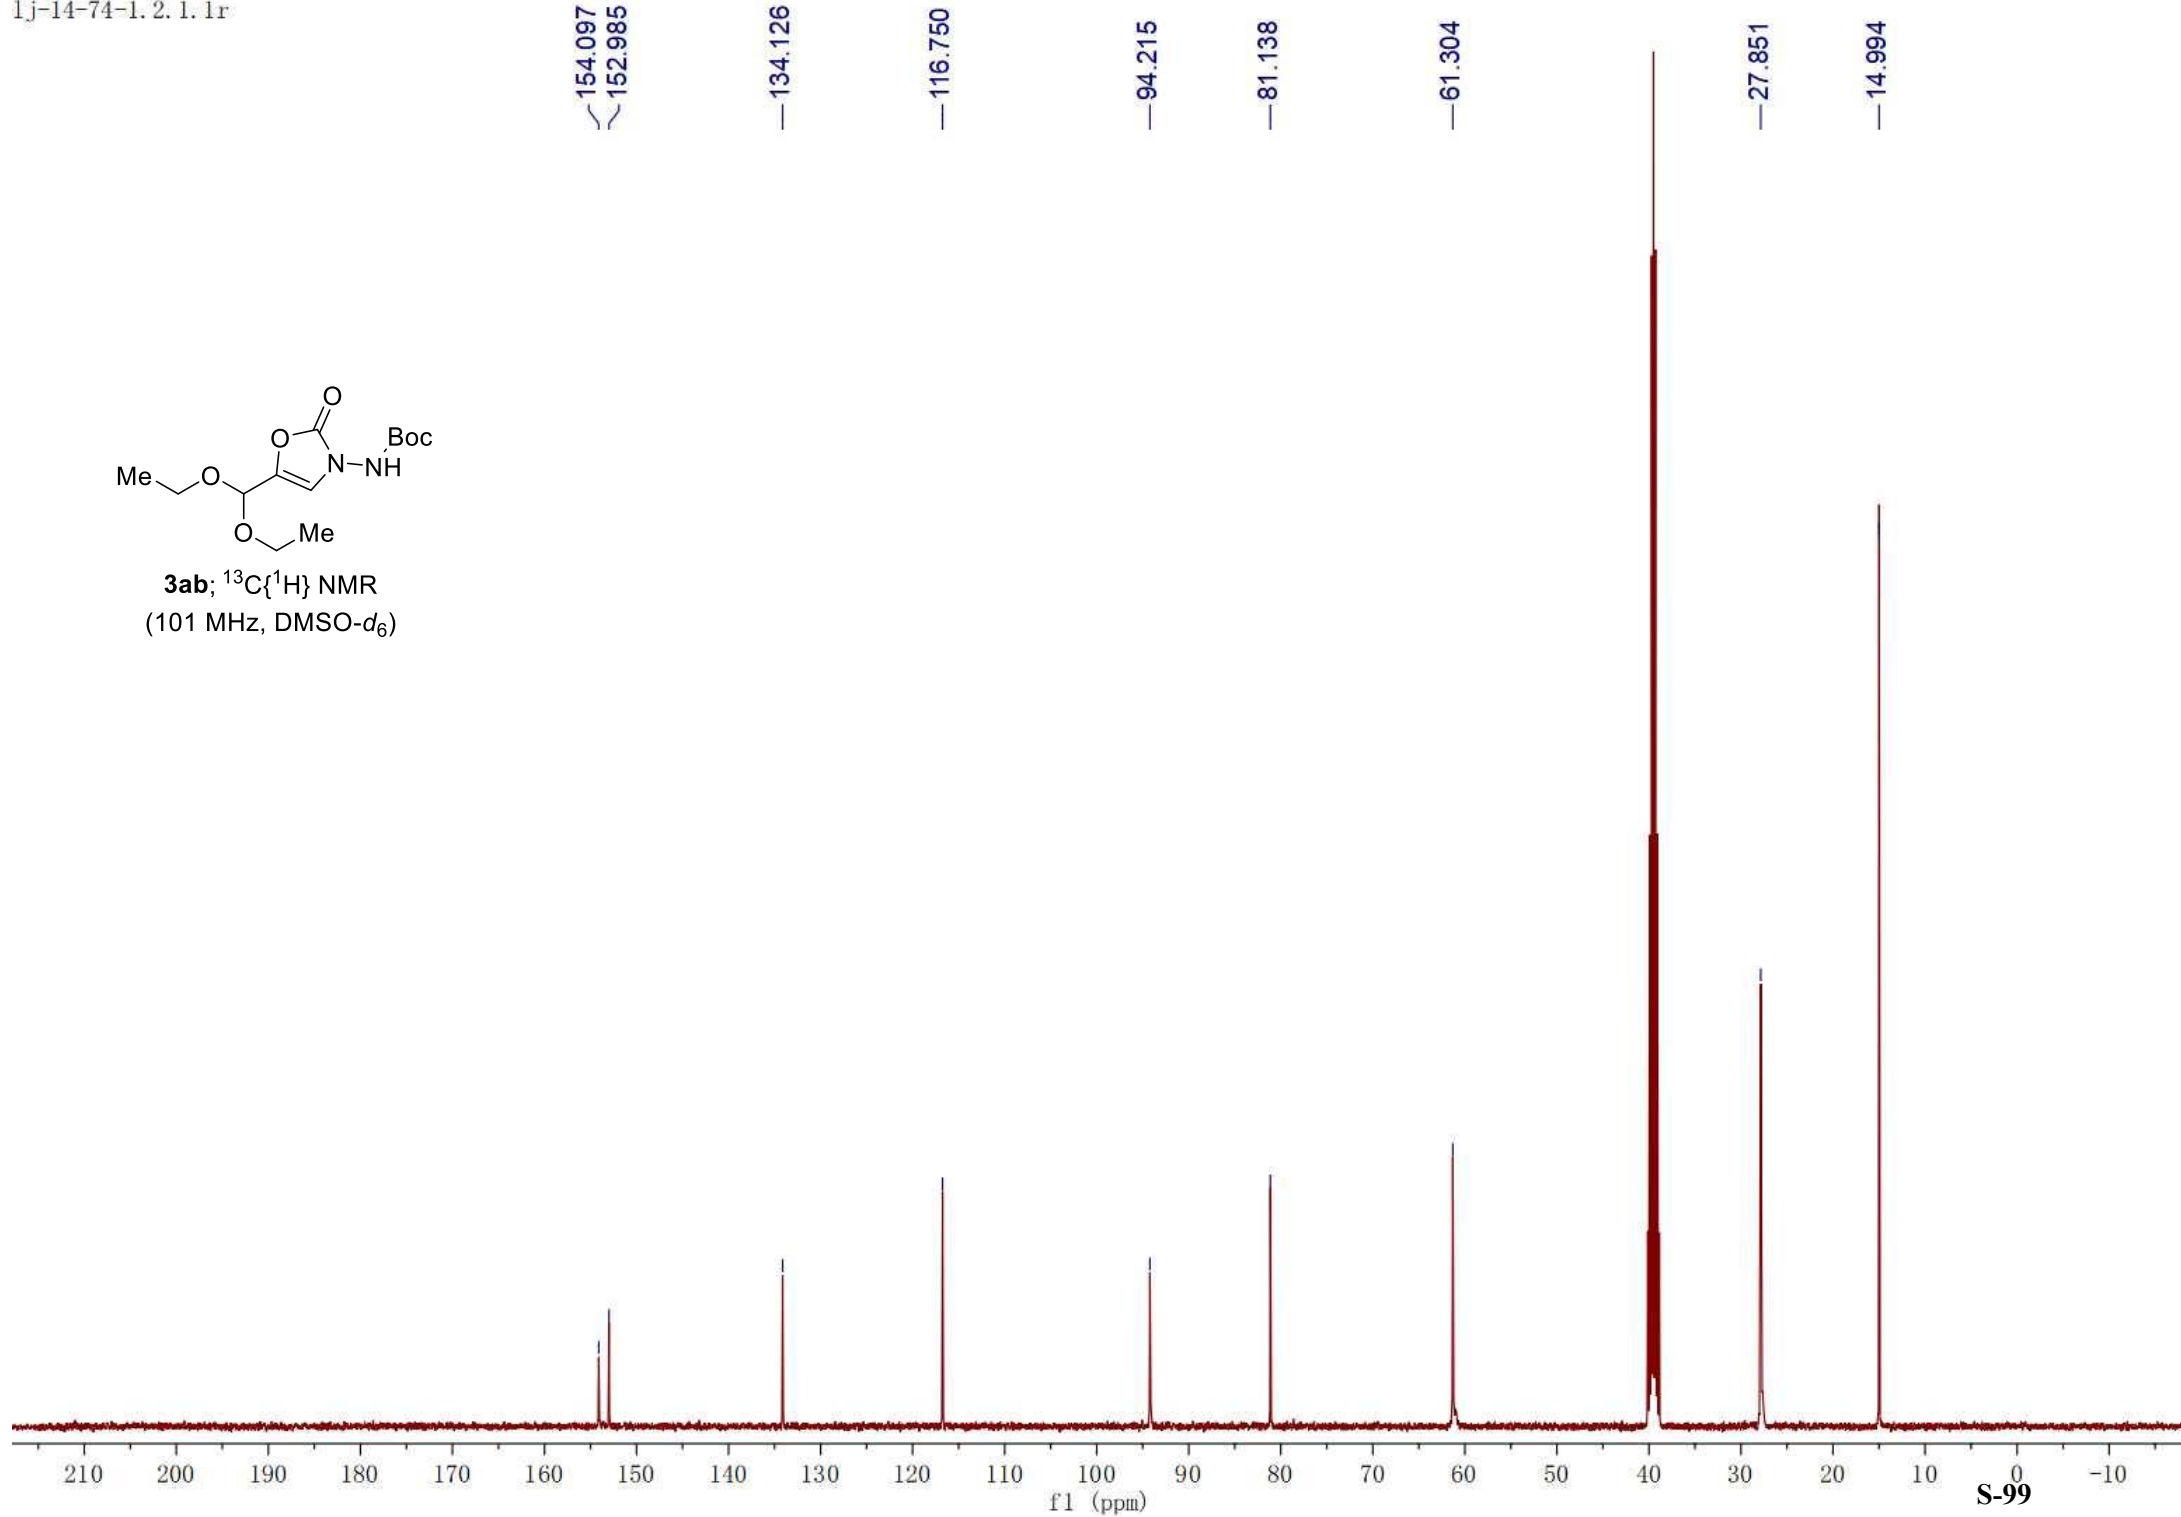

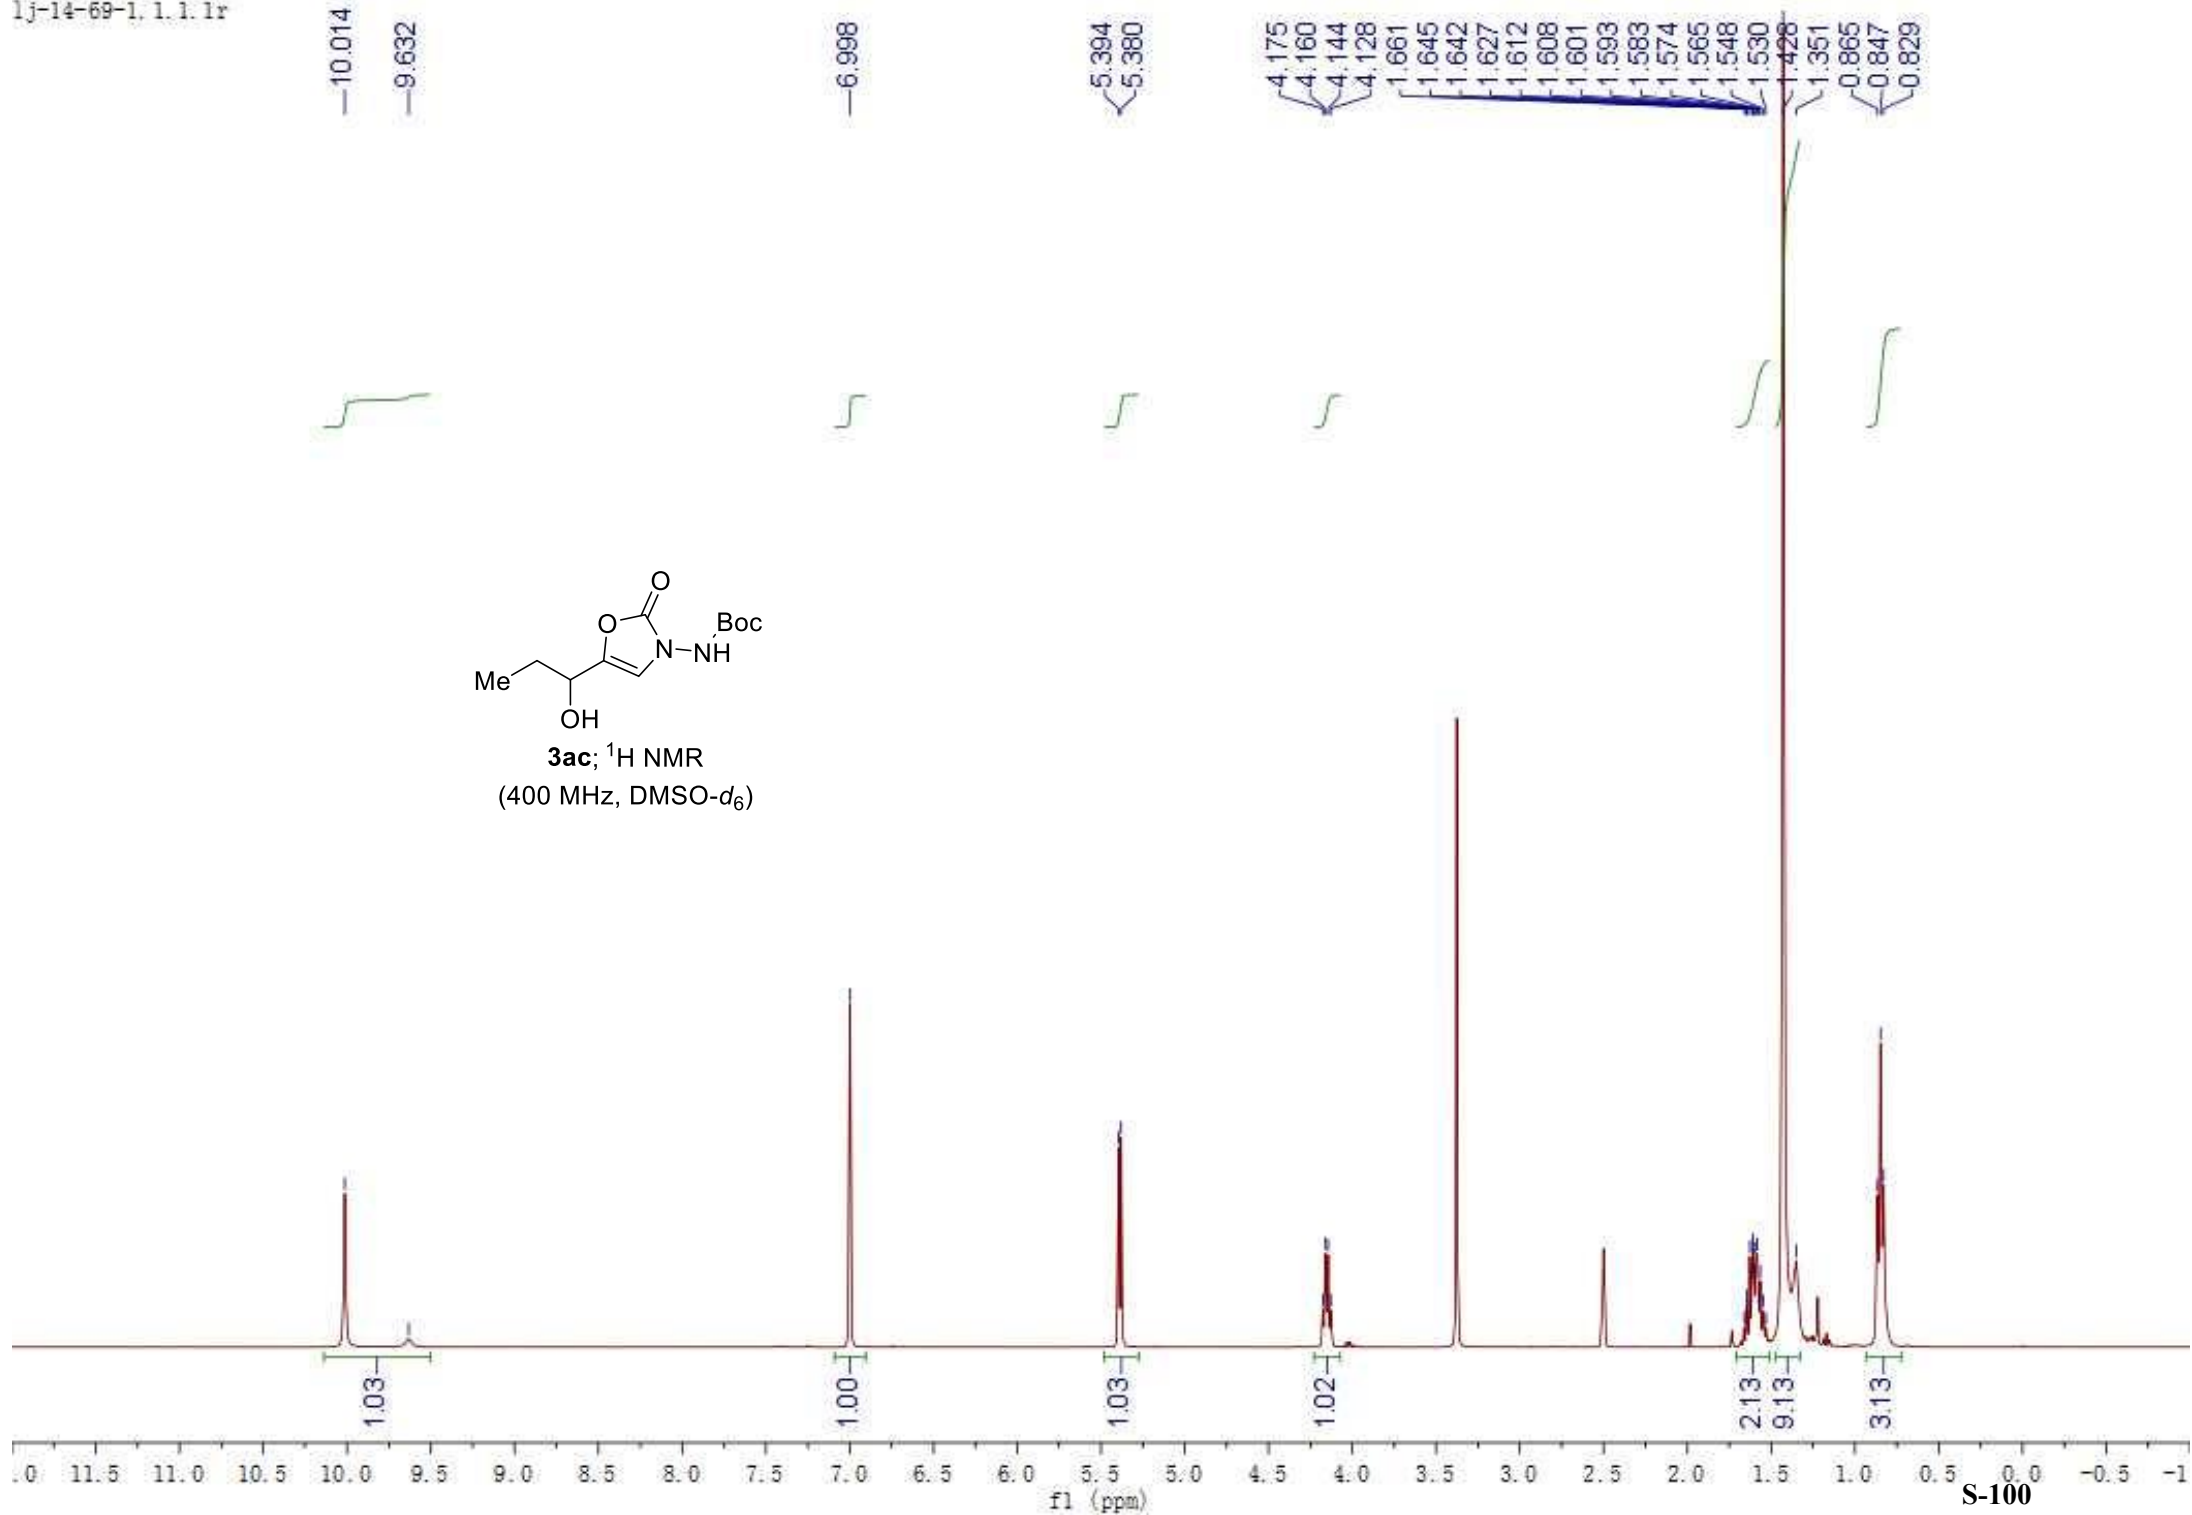



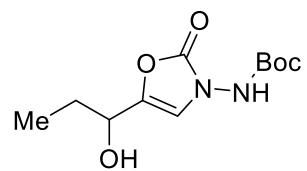

**3ac**;  $^{13}\text{C}\{^1\text{H}\}$  NMR  
(101 MHz, DMSO- $d_6$ )

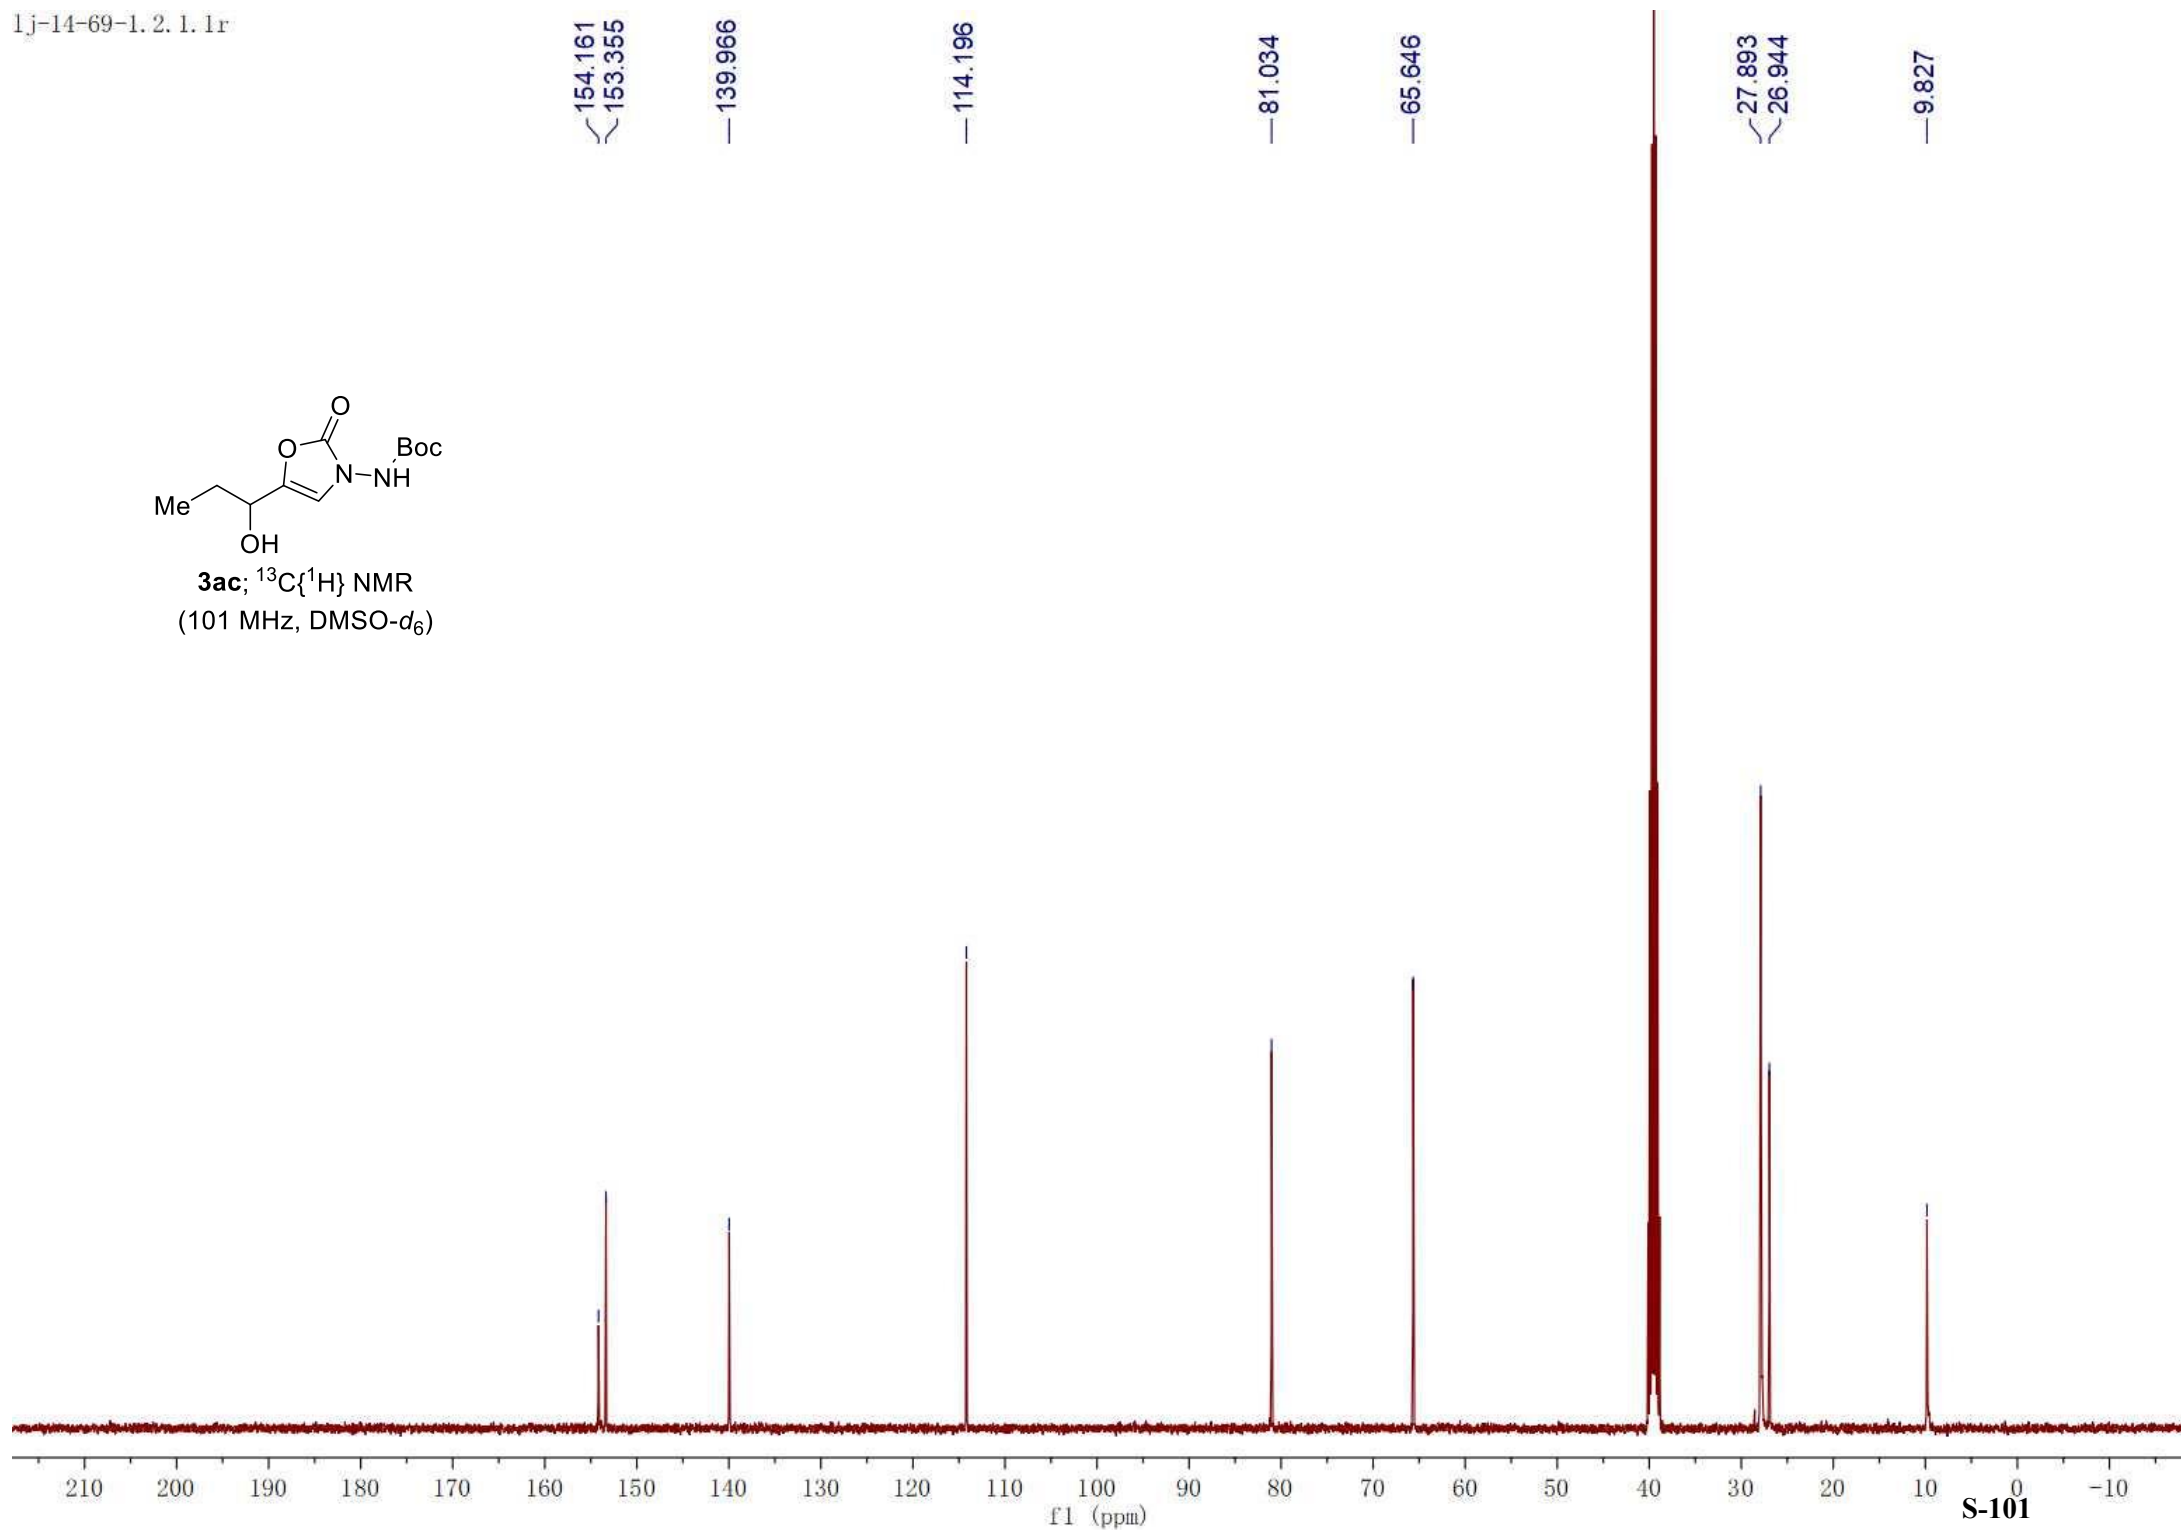

—10.001

—9.641

—6.958

—5.084

—1.615

—1.430

—1.360

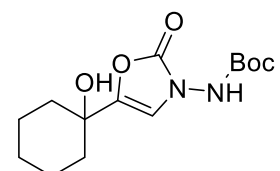

**3ad**;  $^1\text{H}$  NMR  
(400 MHz,  $\text{DMSO-}d_6$ )

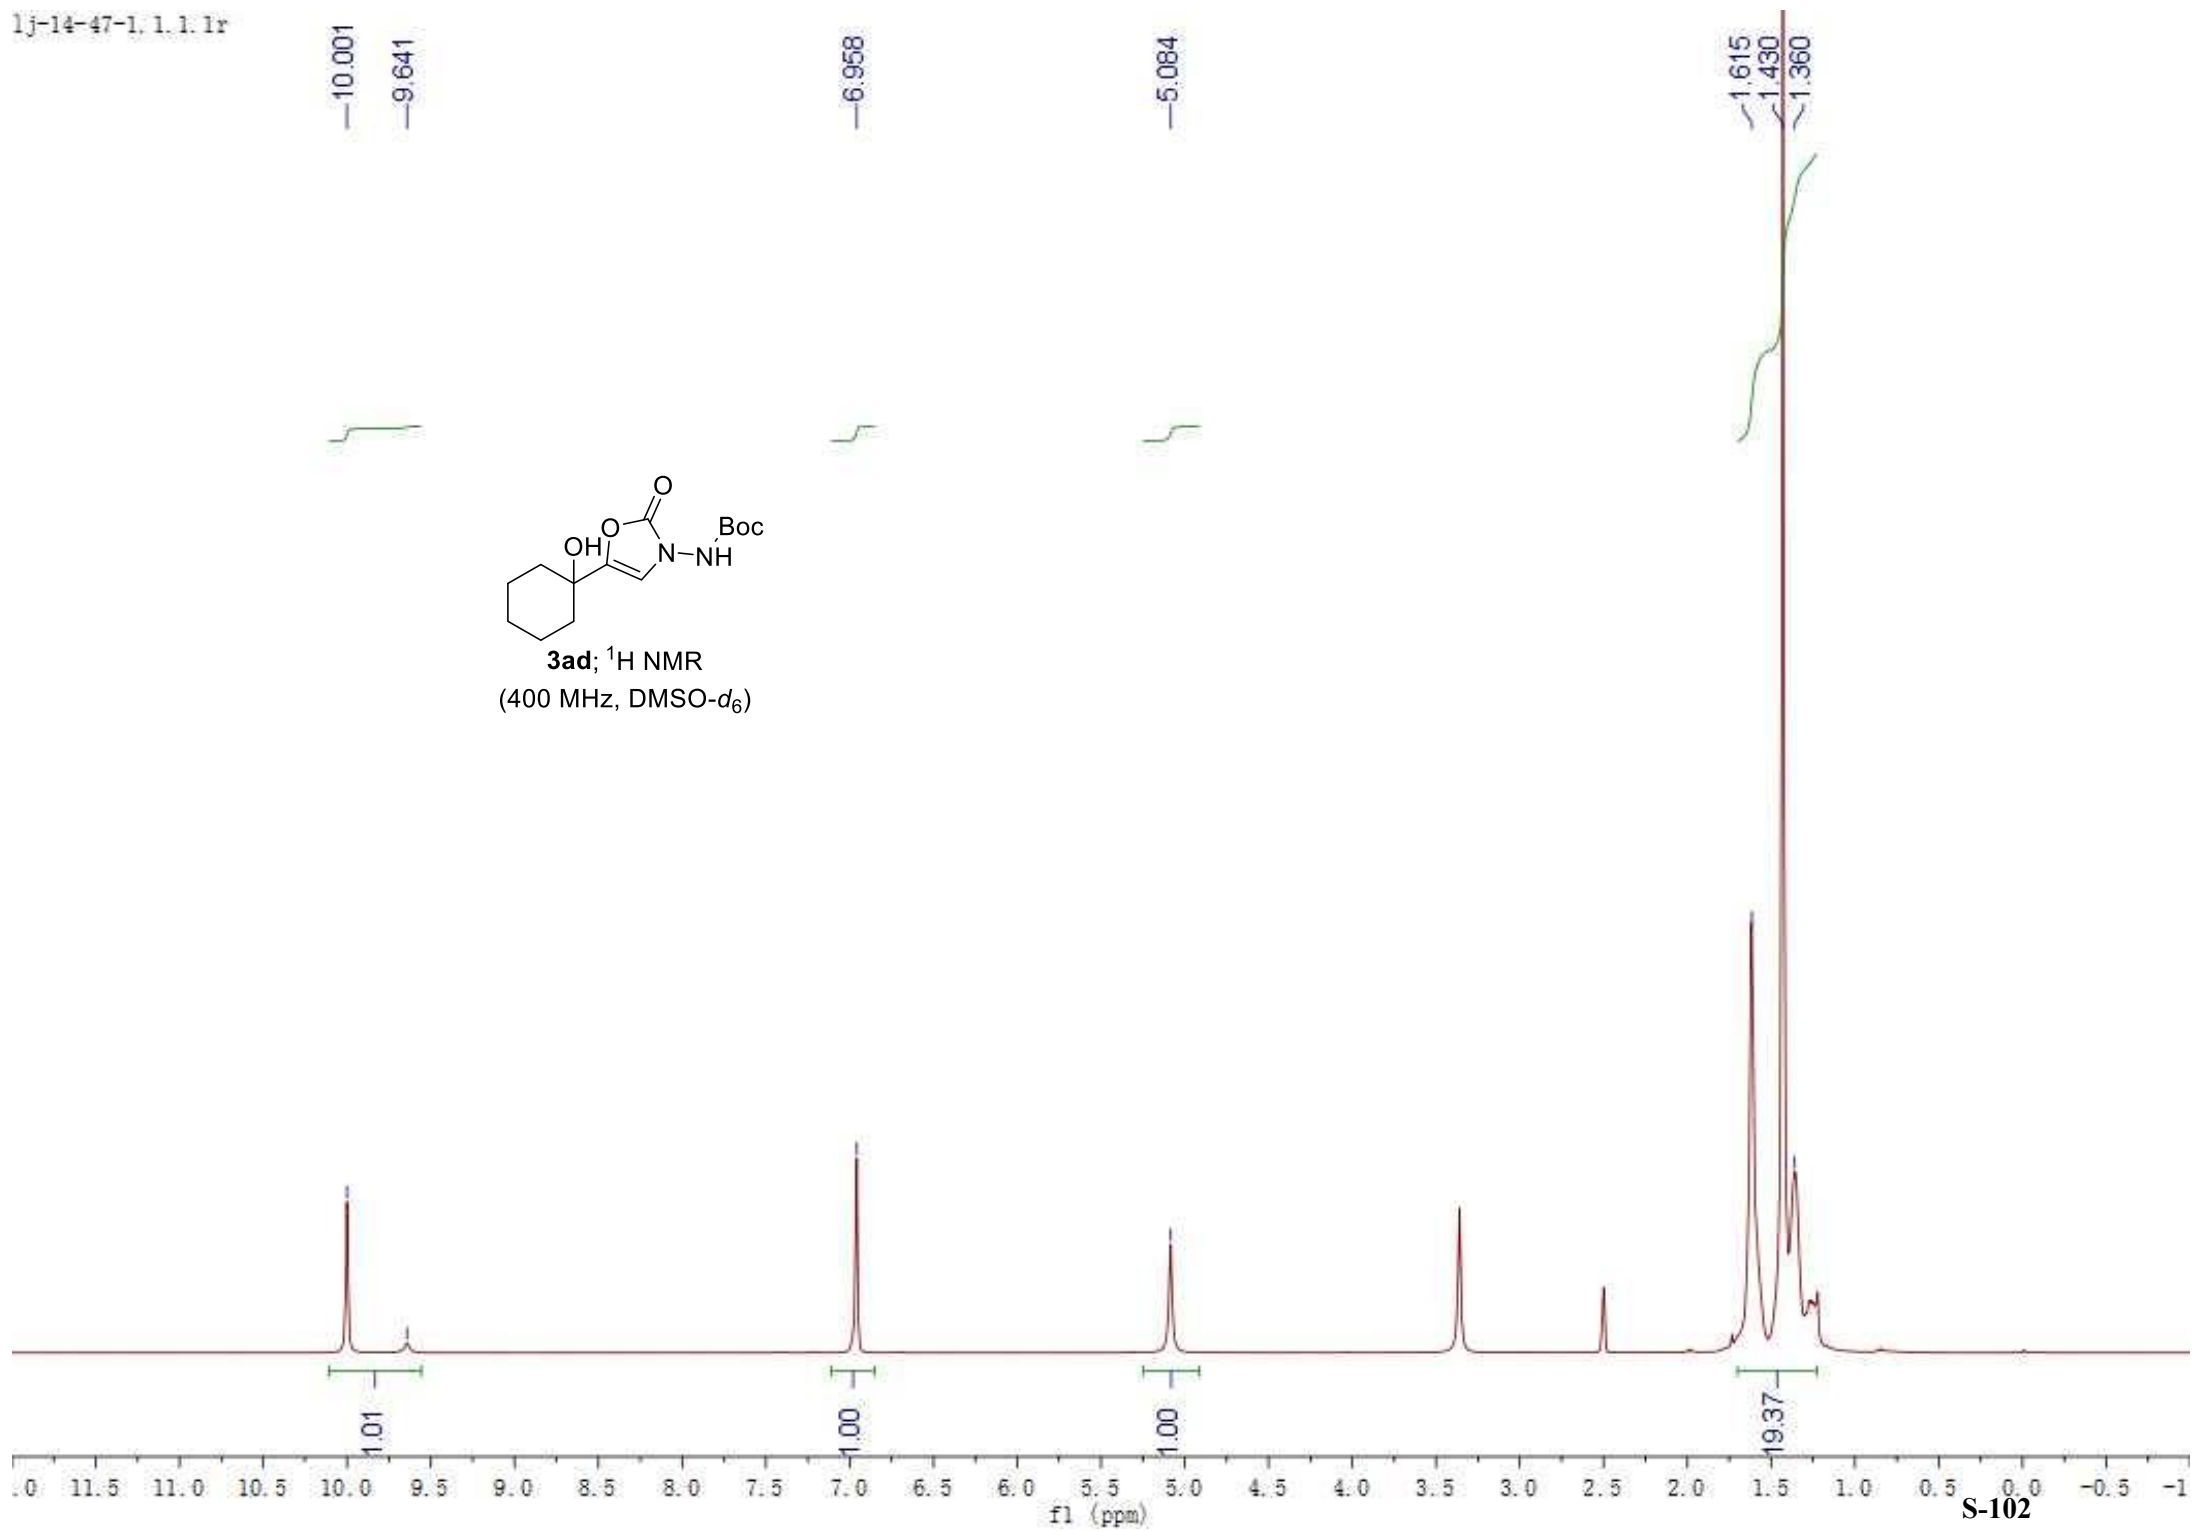

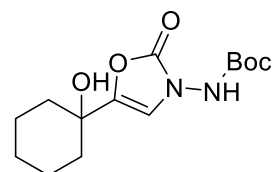

**3ad**;  $^{13}\text{C}\{^1\text{H}\}$  NMR  
(101 MHz,  $\text{DMSO}-d_6$ )

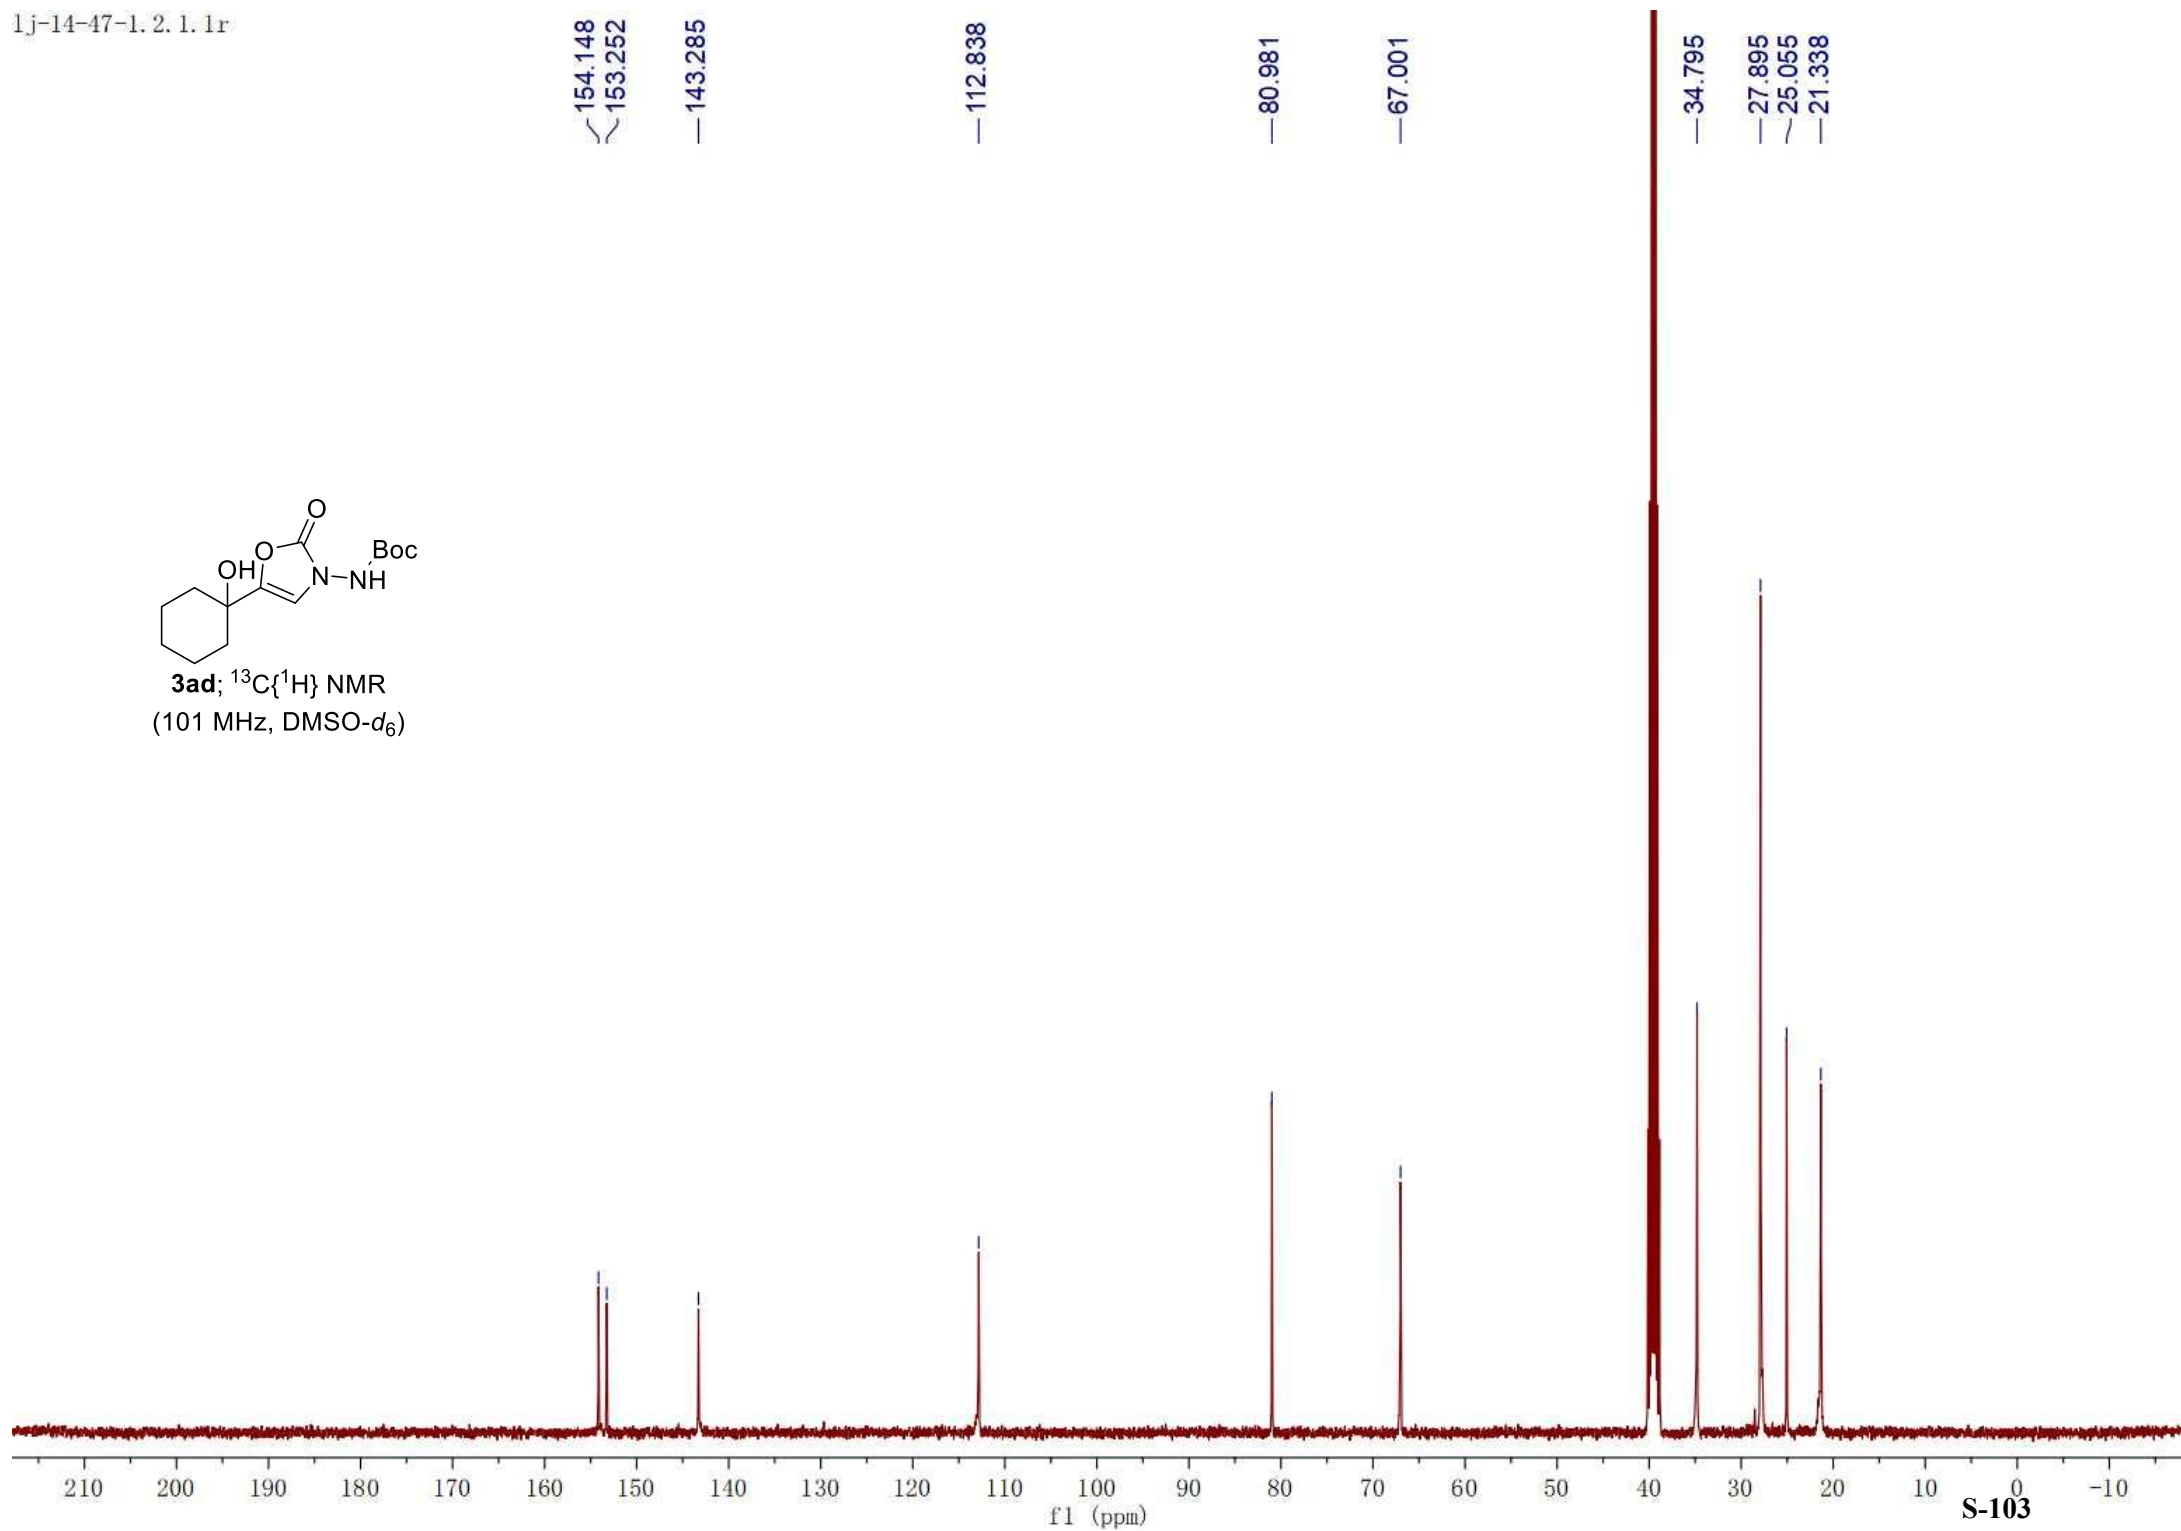

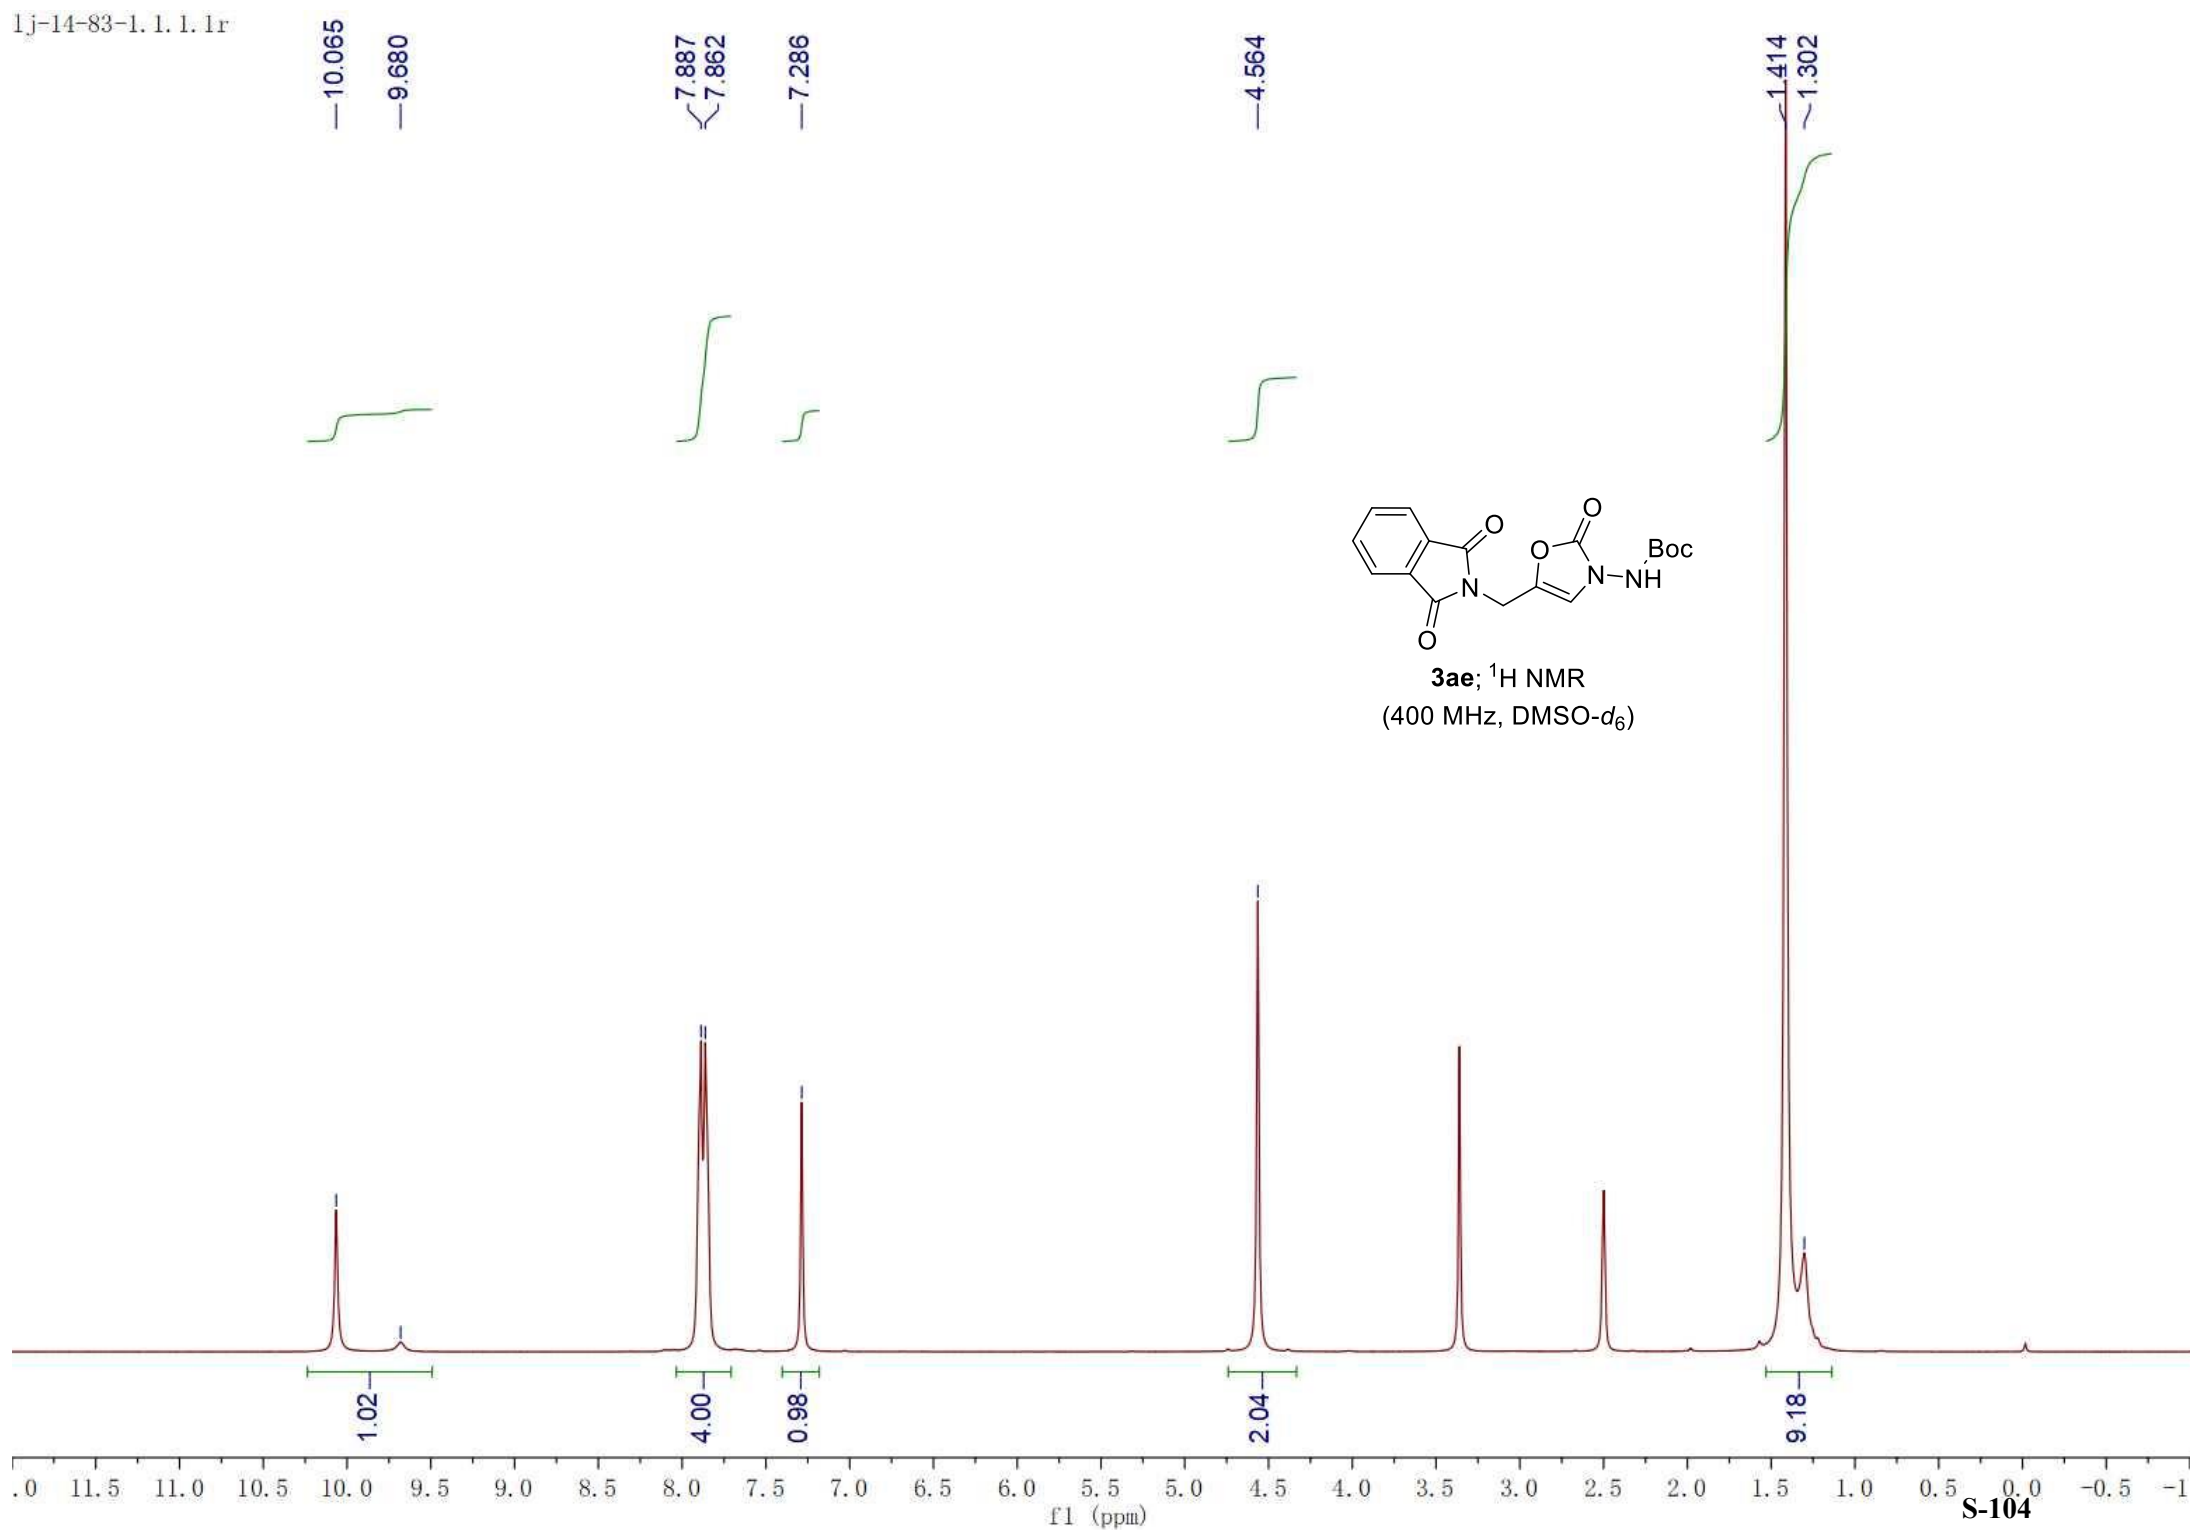

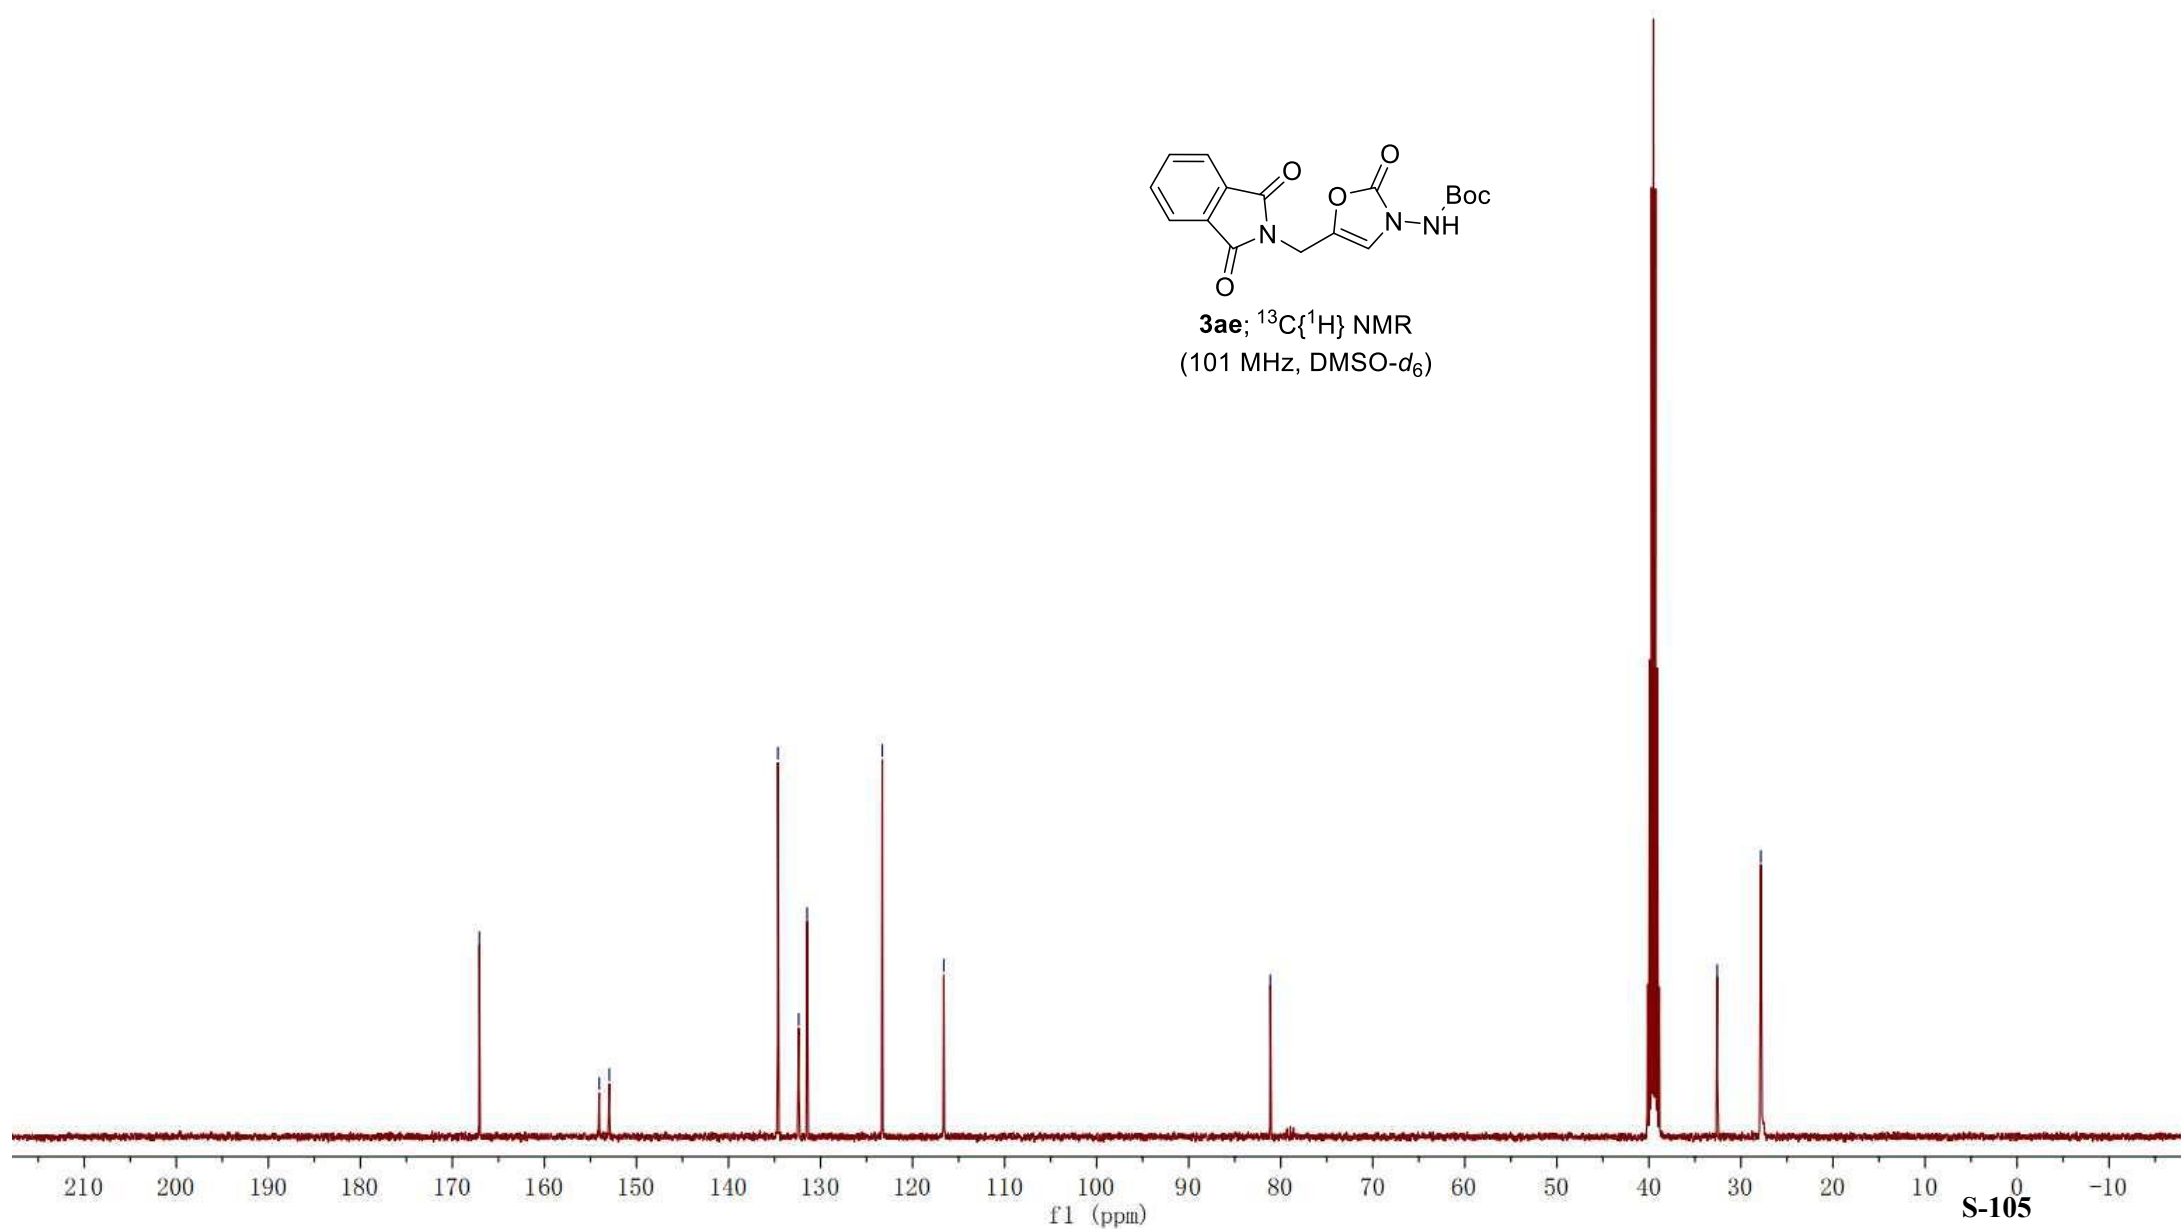

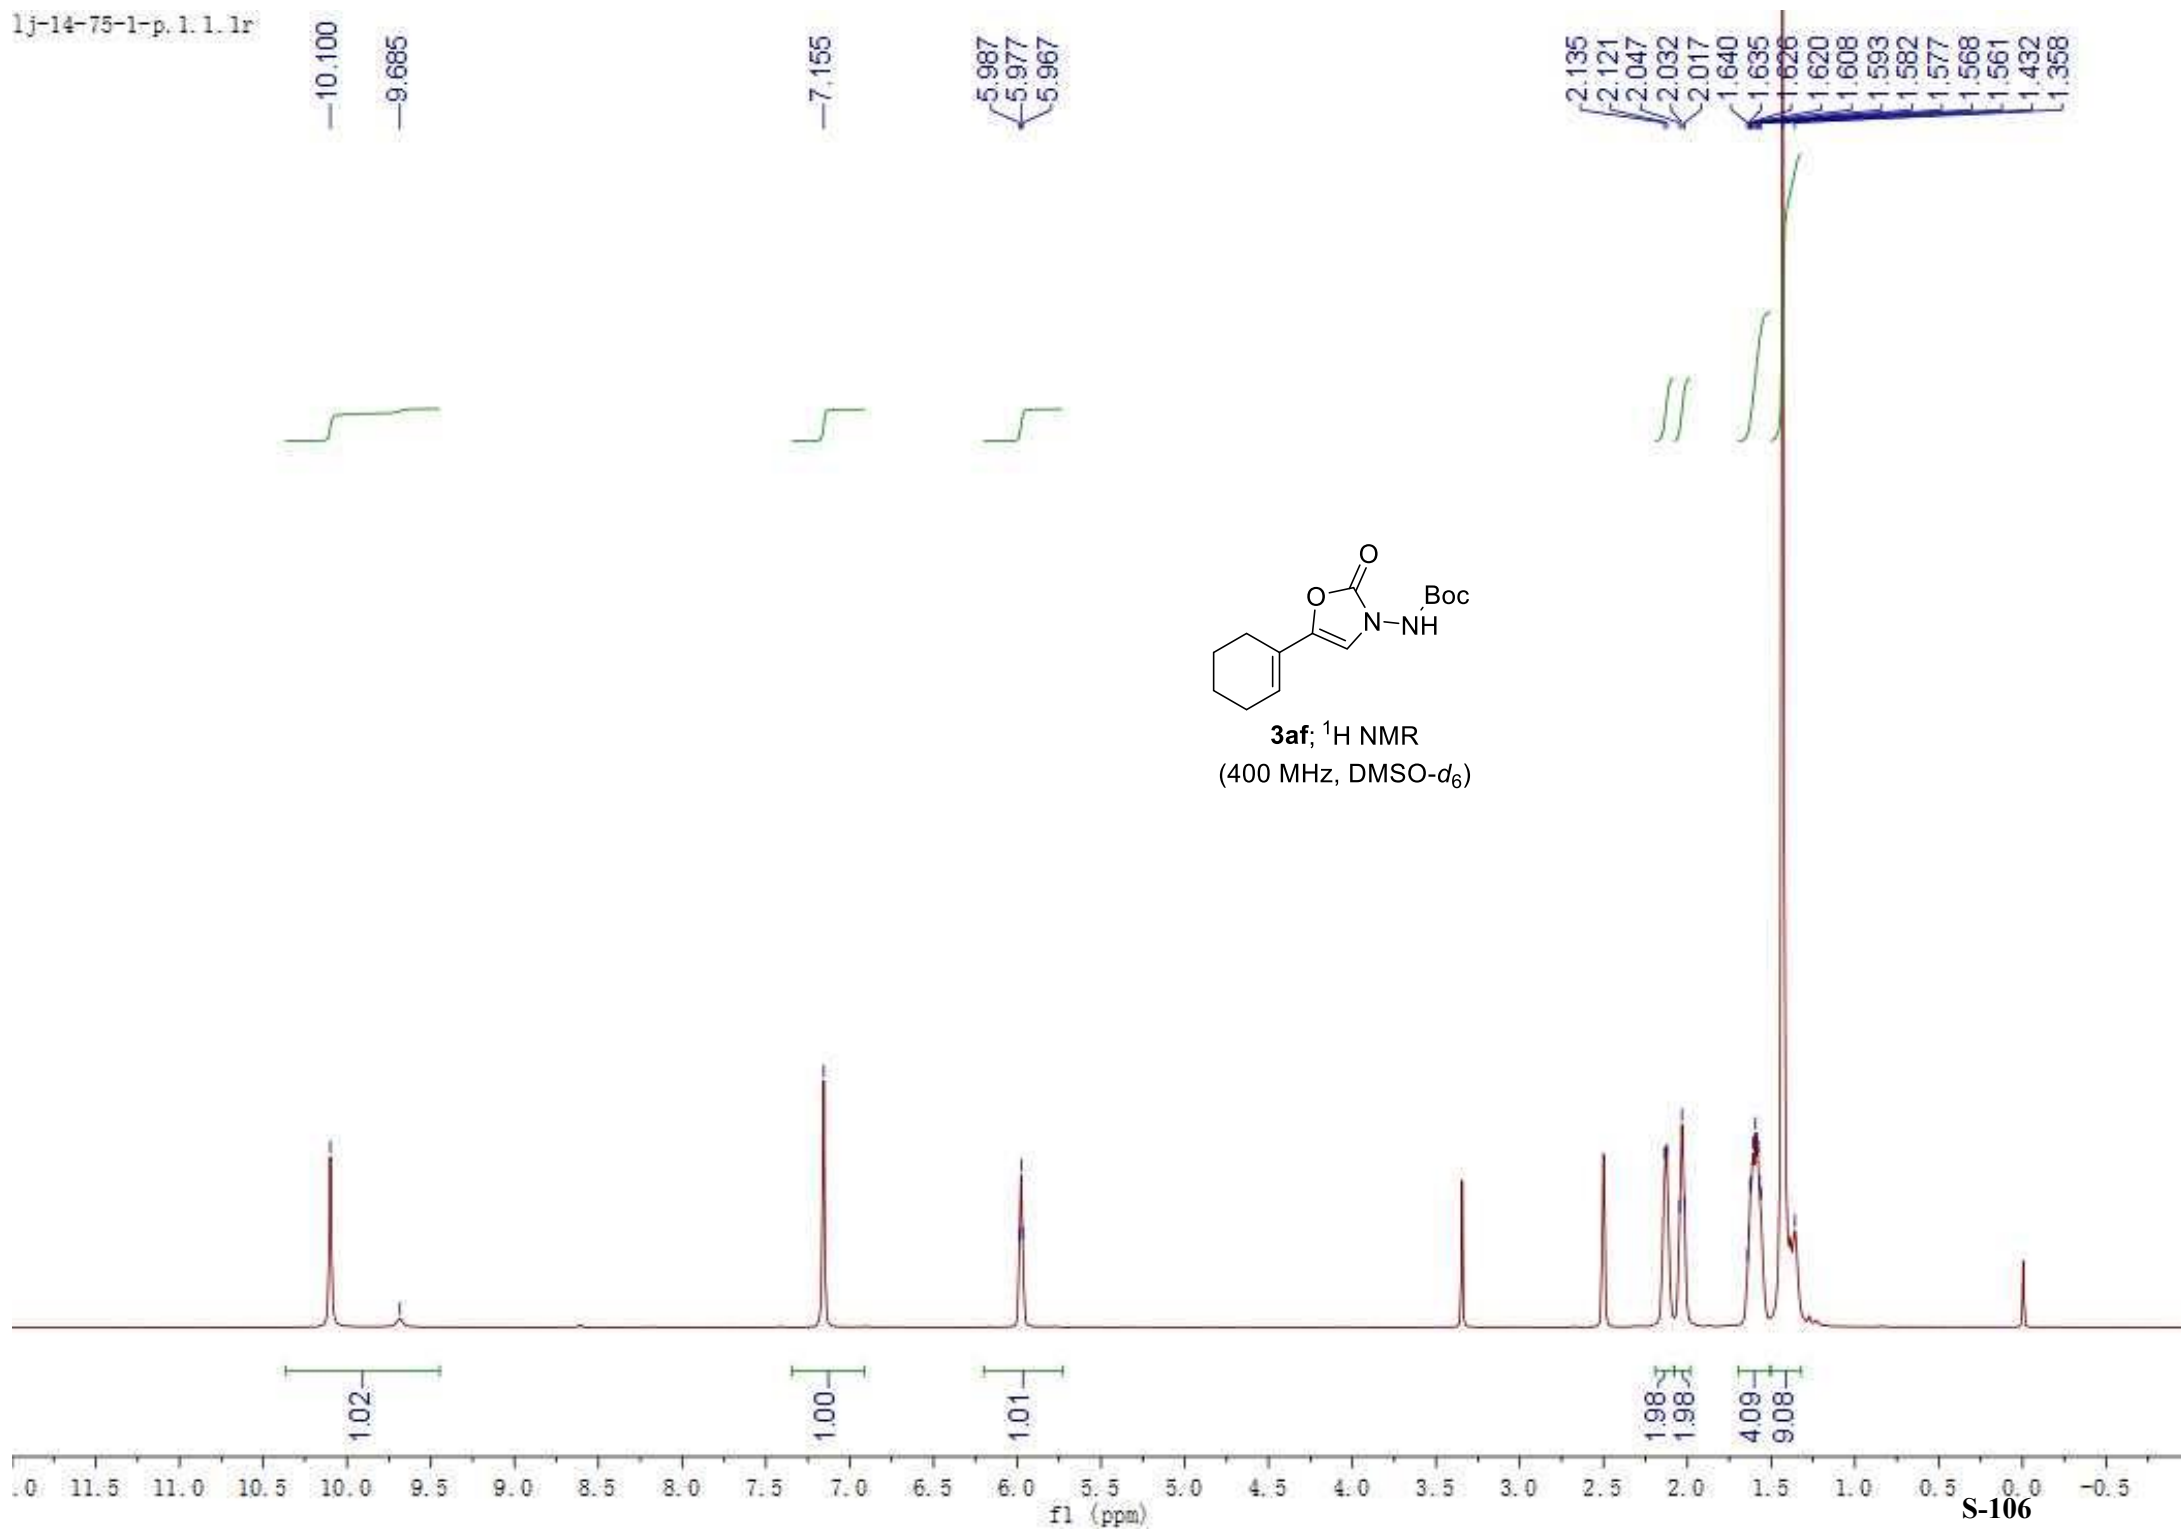

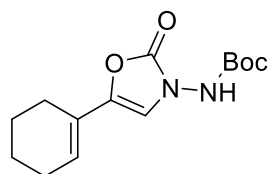

**3af**,  $^{13}\text{C}\{^1\text{H}\}$  NMR  
(101 MHz,  $\text{DMSO}-d_6$ )

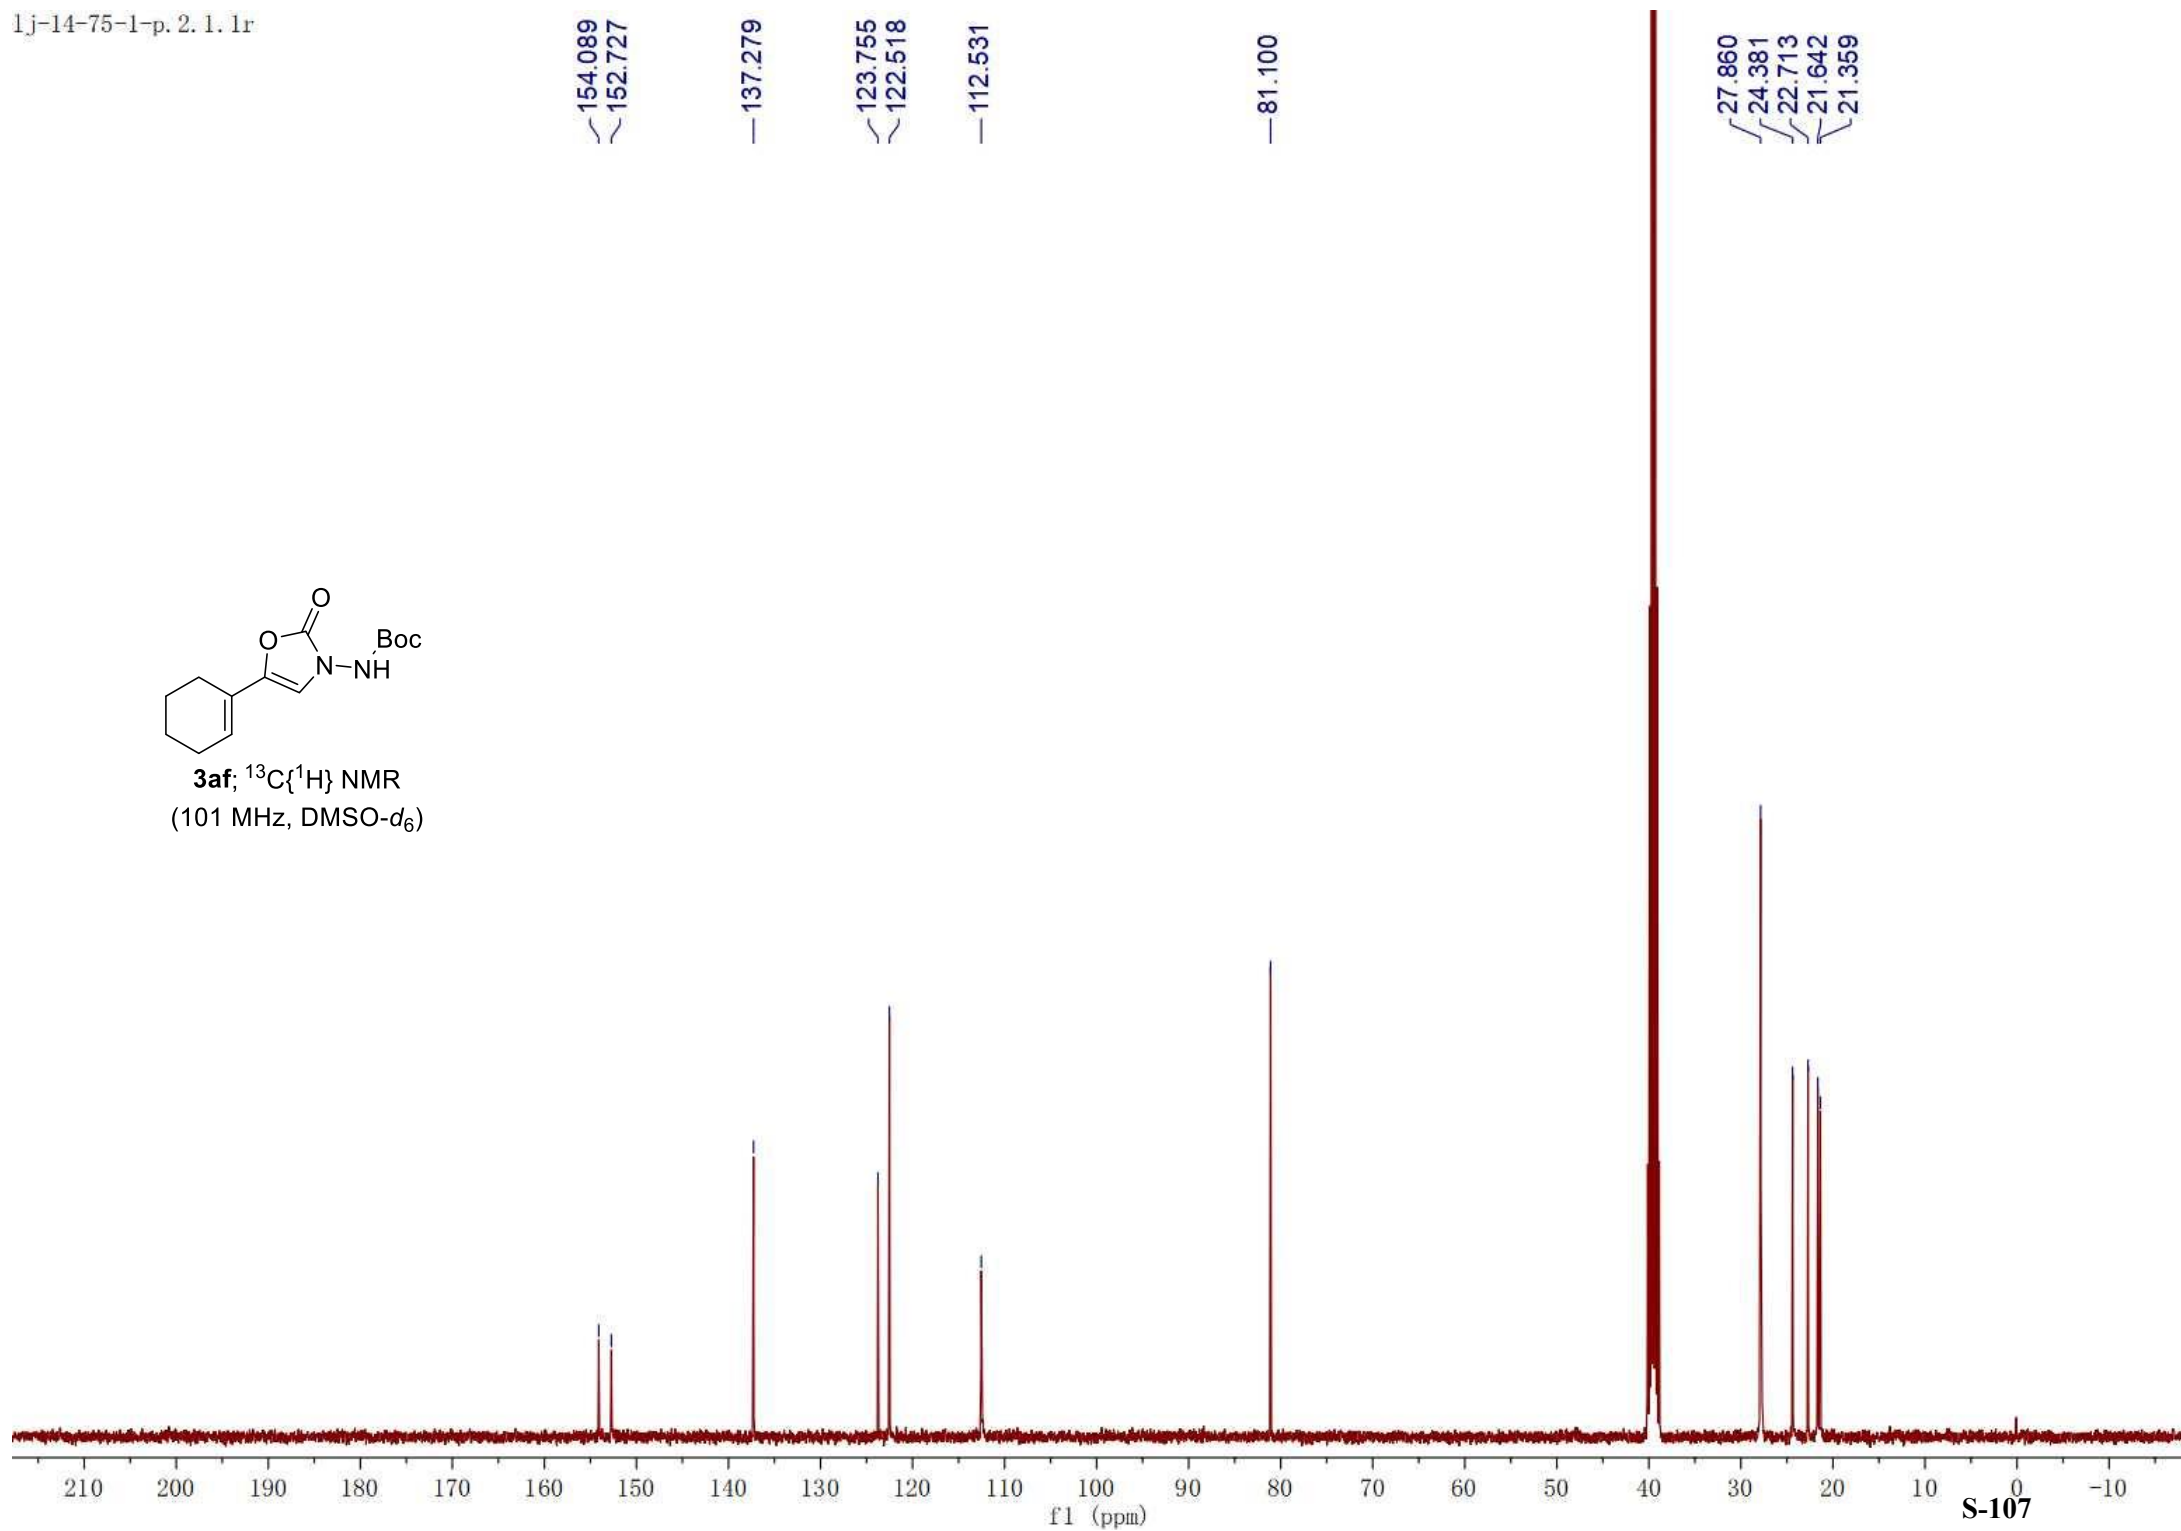

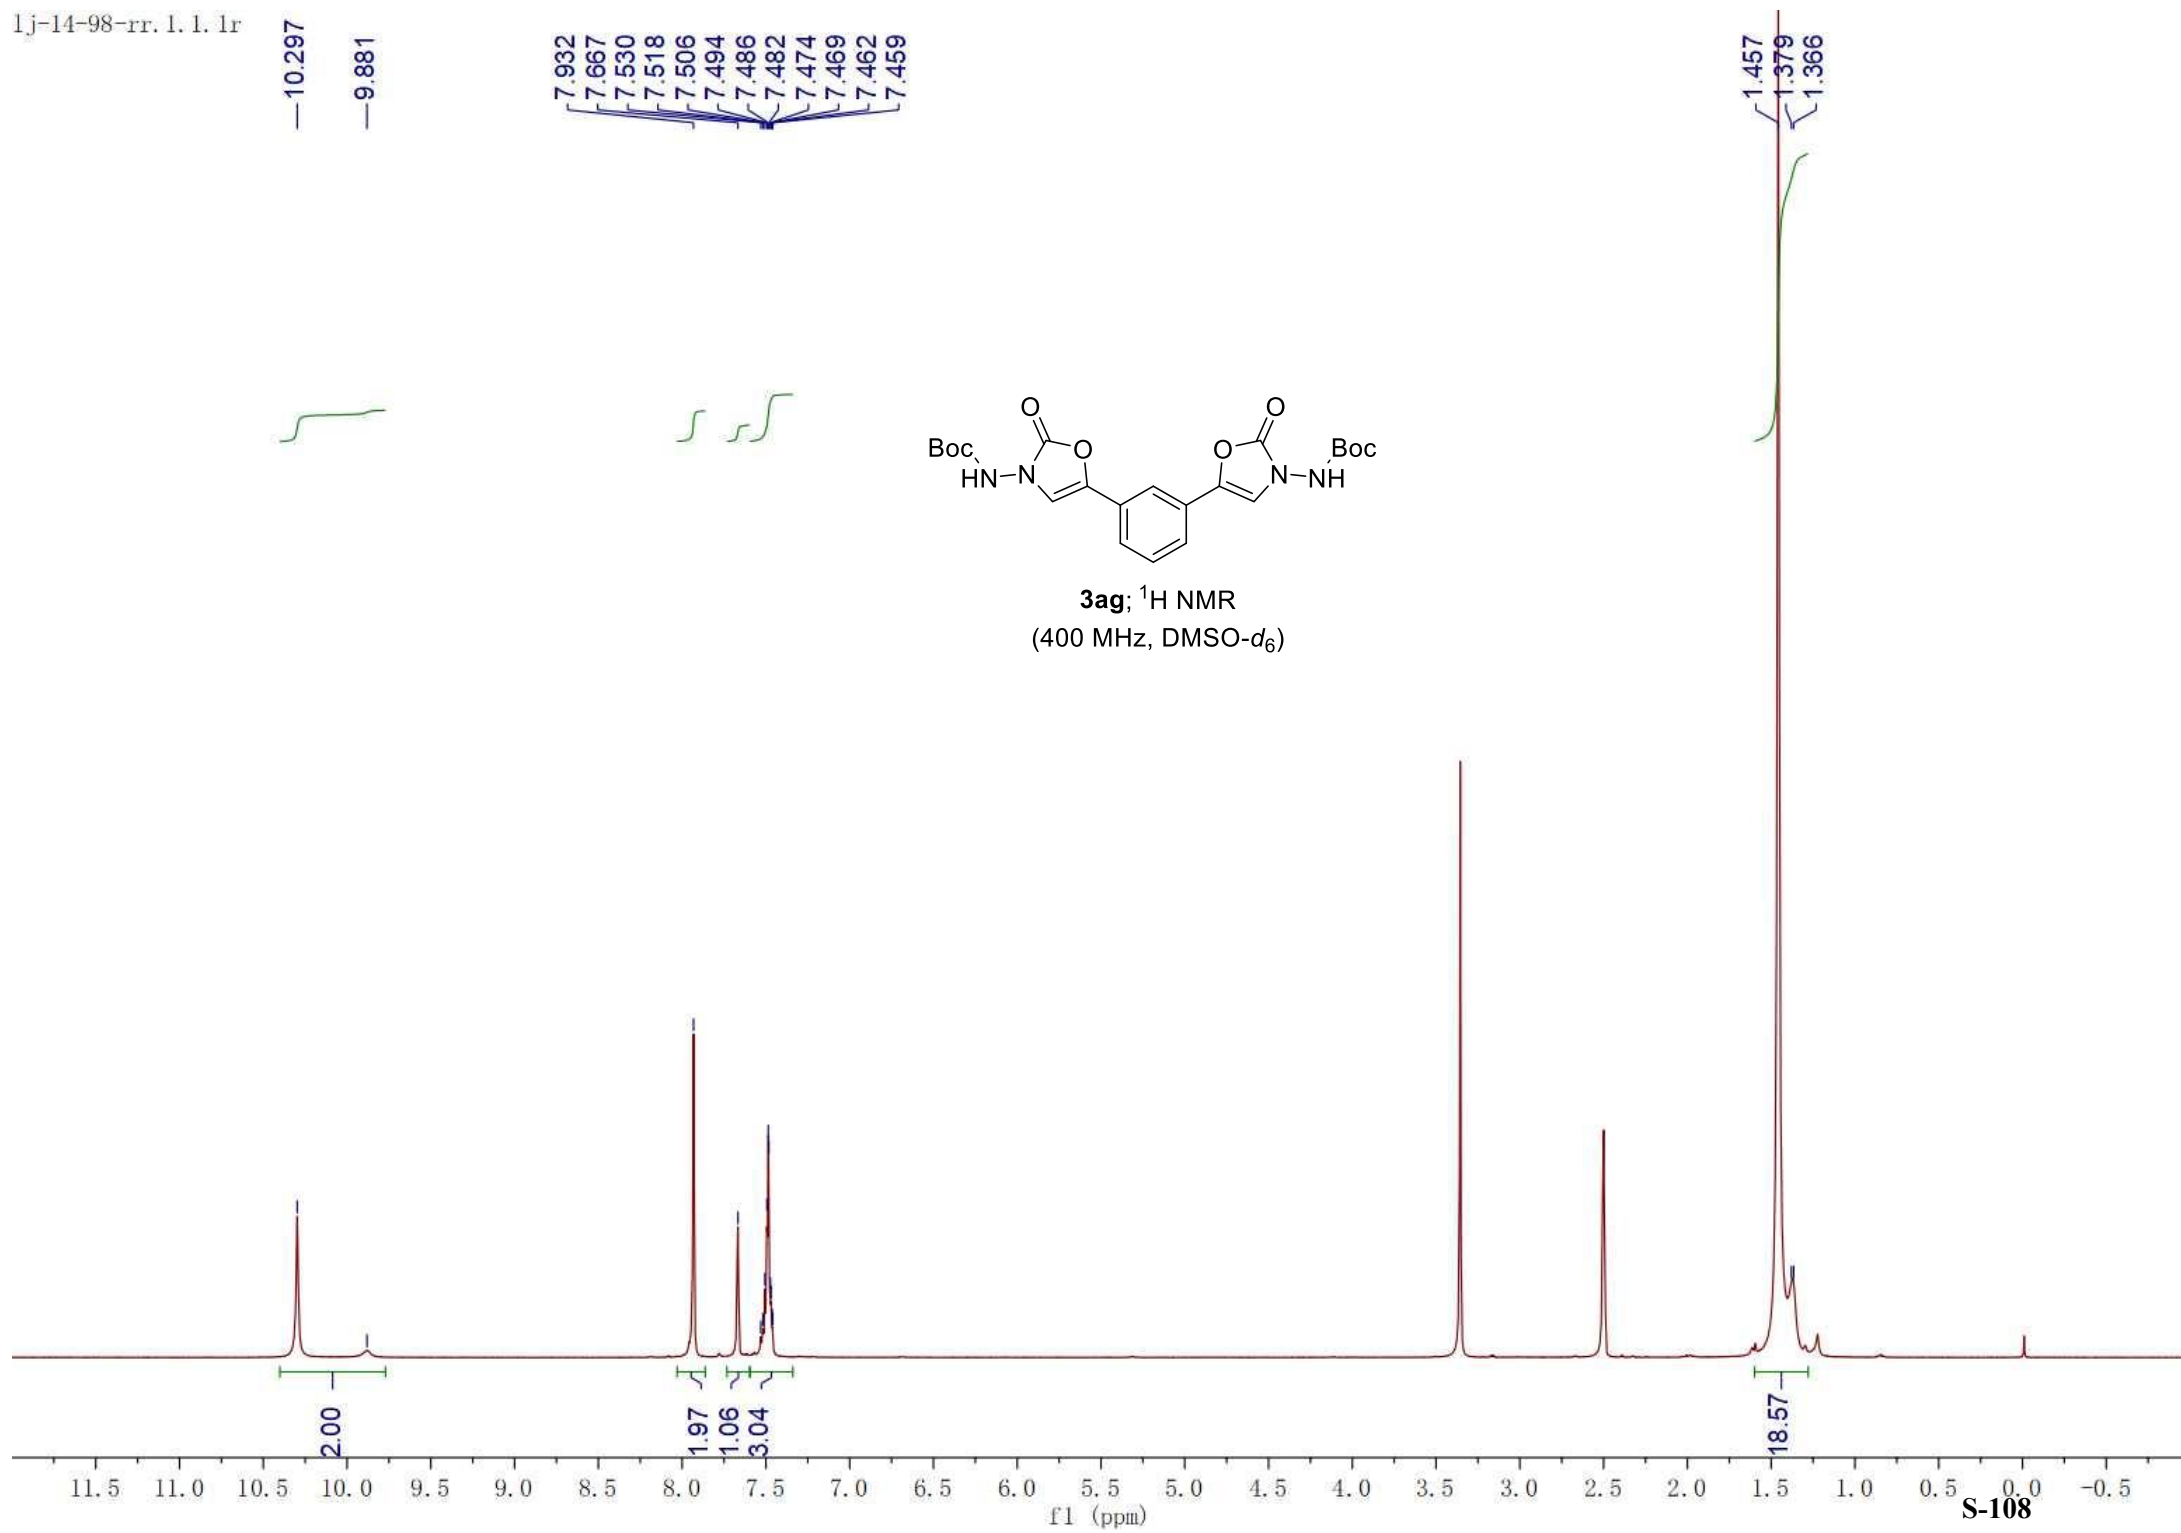



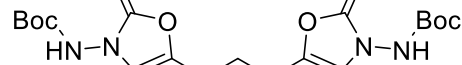

**3ag**;  $^{13}\text{C}\{^1\text{H}\}$  NMR  
(101 MHz, DMSO- $d_6$ )

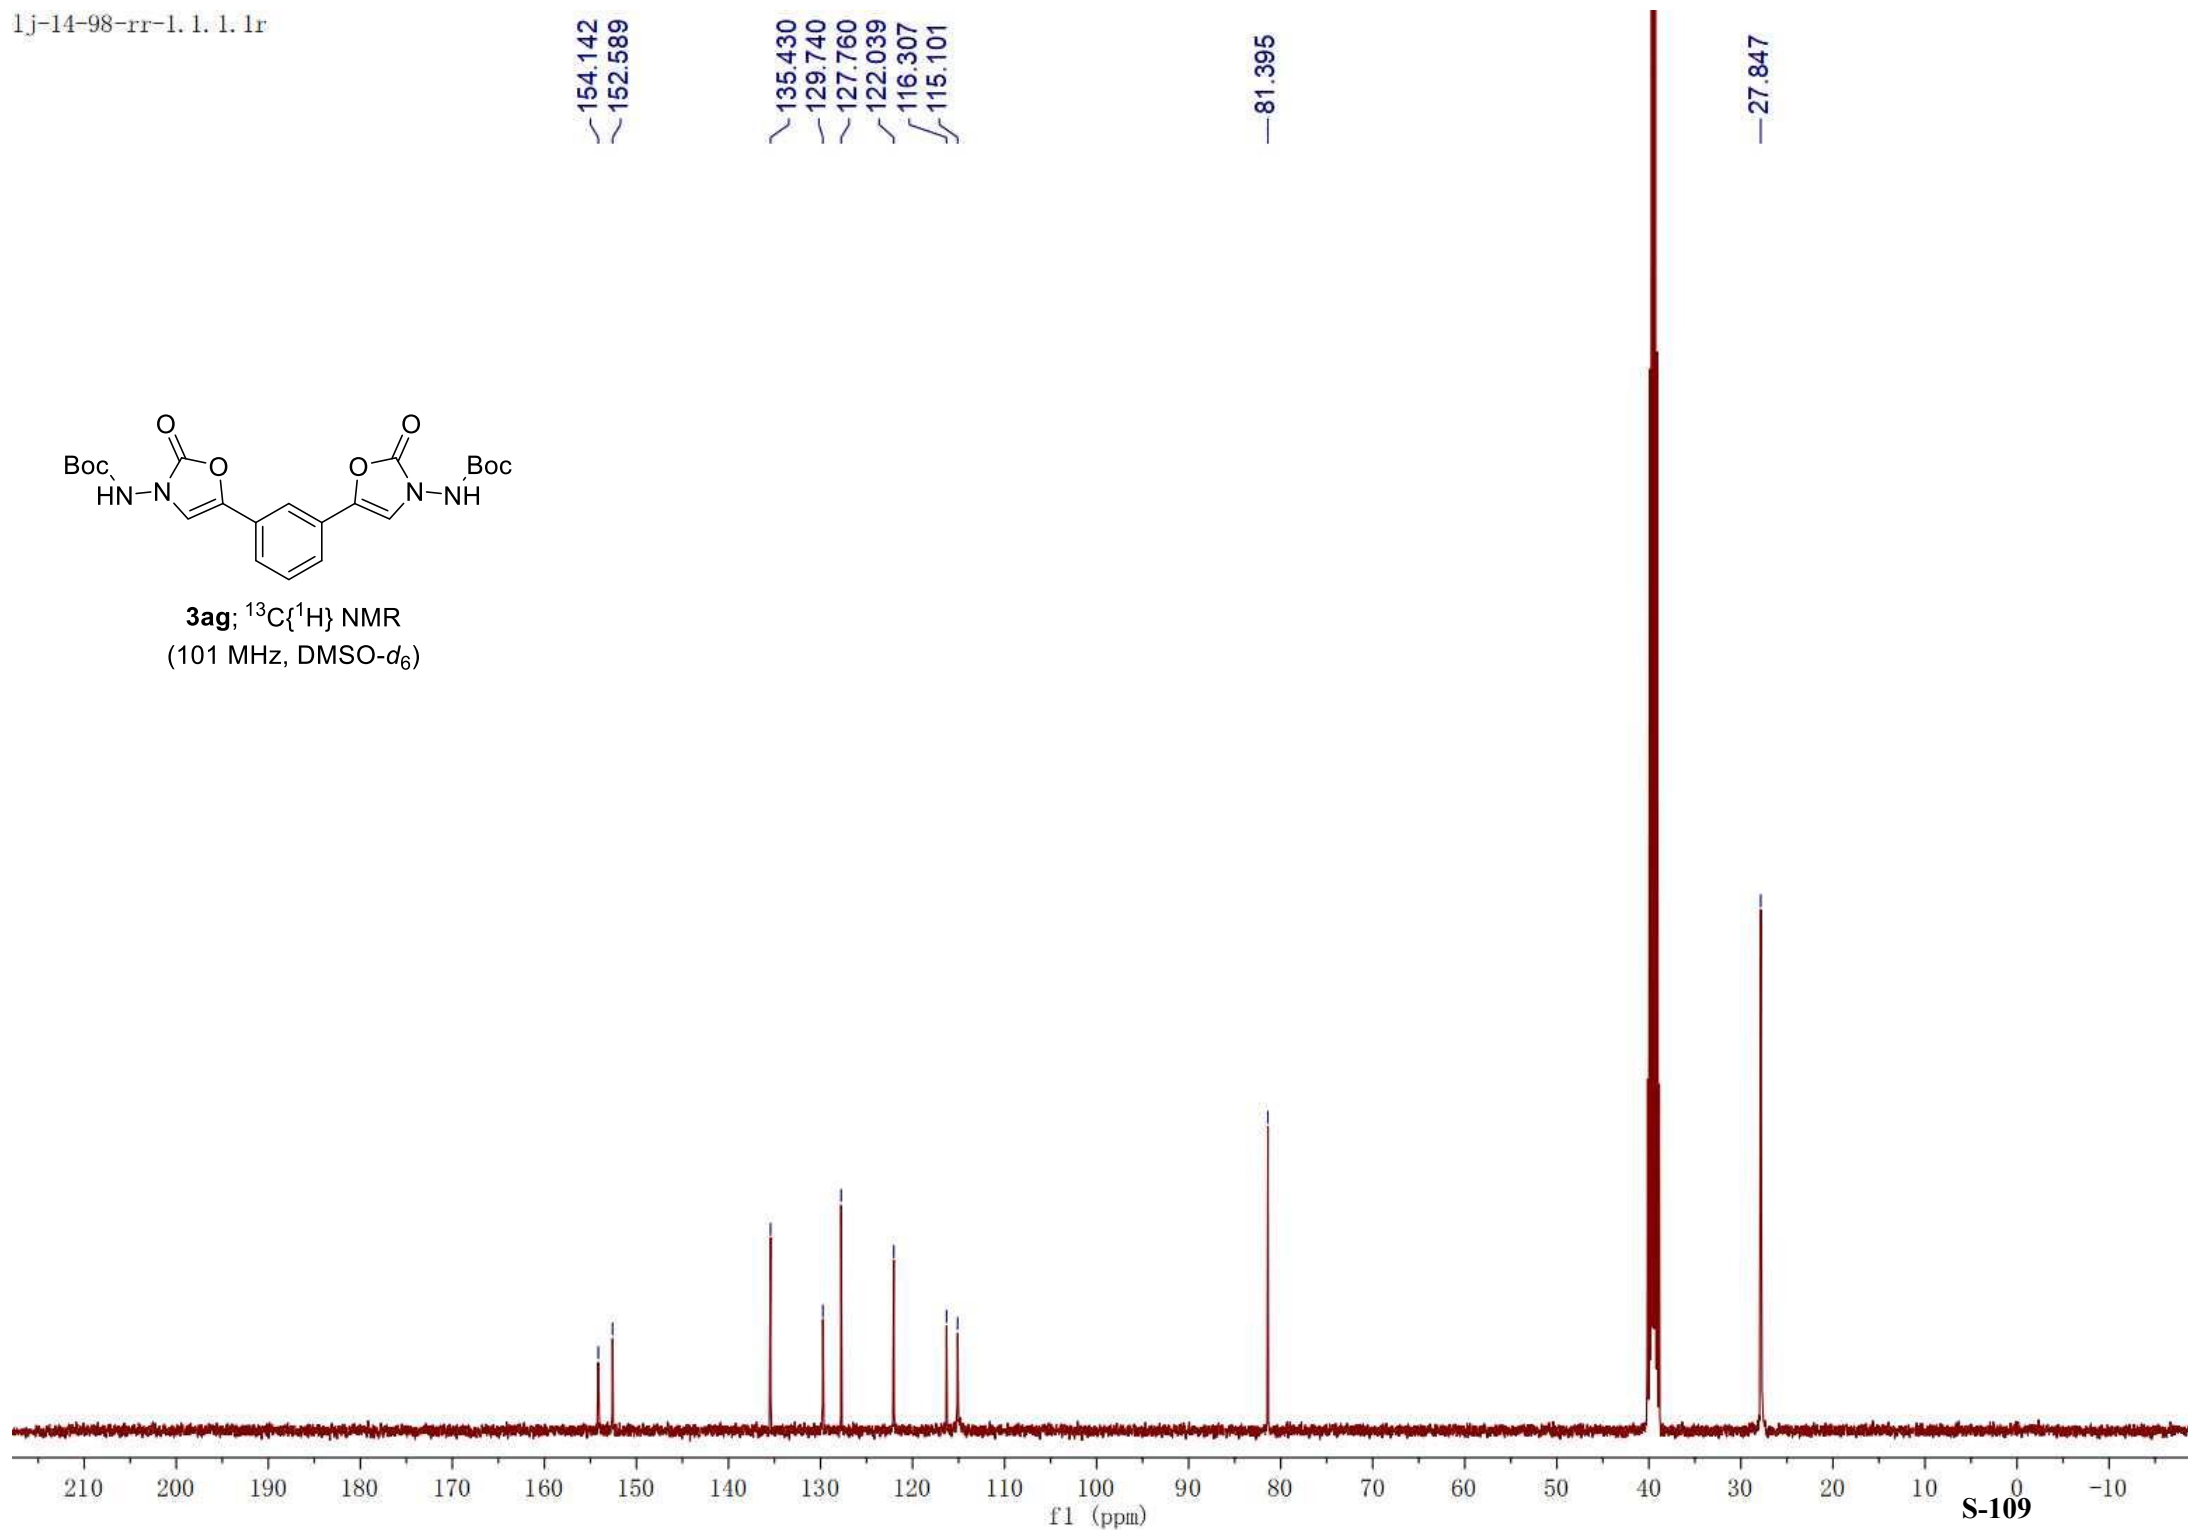

—10.112

—9.717

—7.318

—4.216

~1.433

~1.360

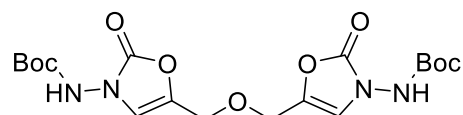

**3ah**;  $^1\text{H}$  NMR  
(400 MHz,  $\text{DMSO}-d_6$ )

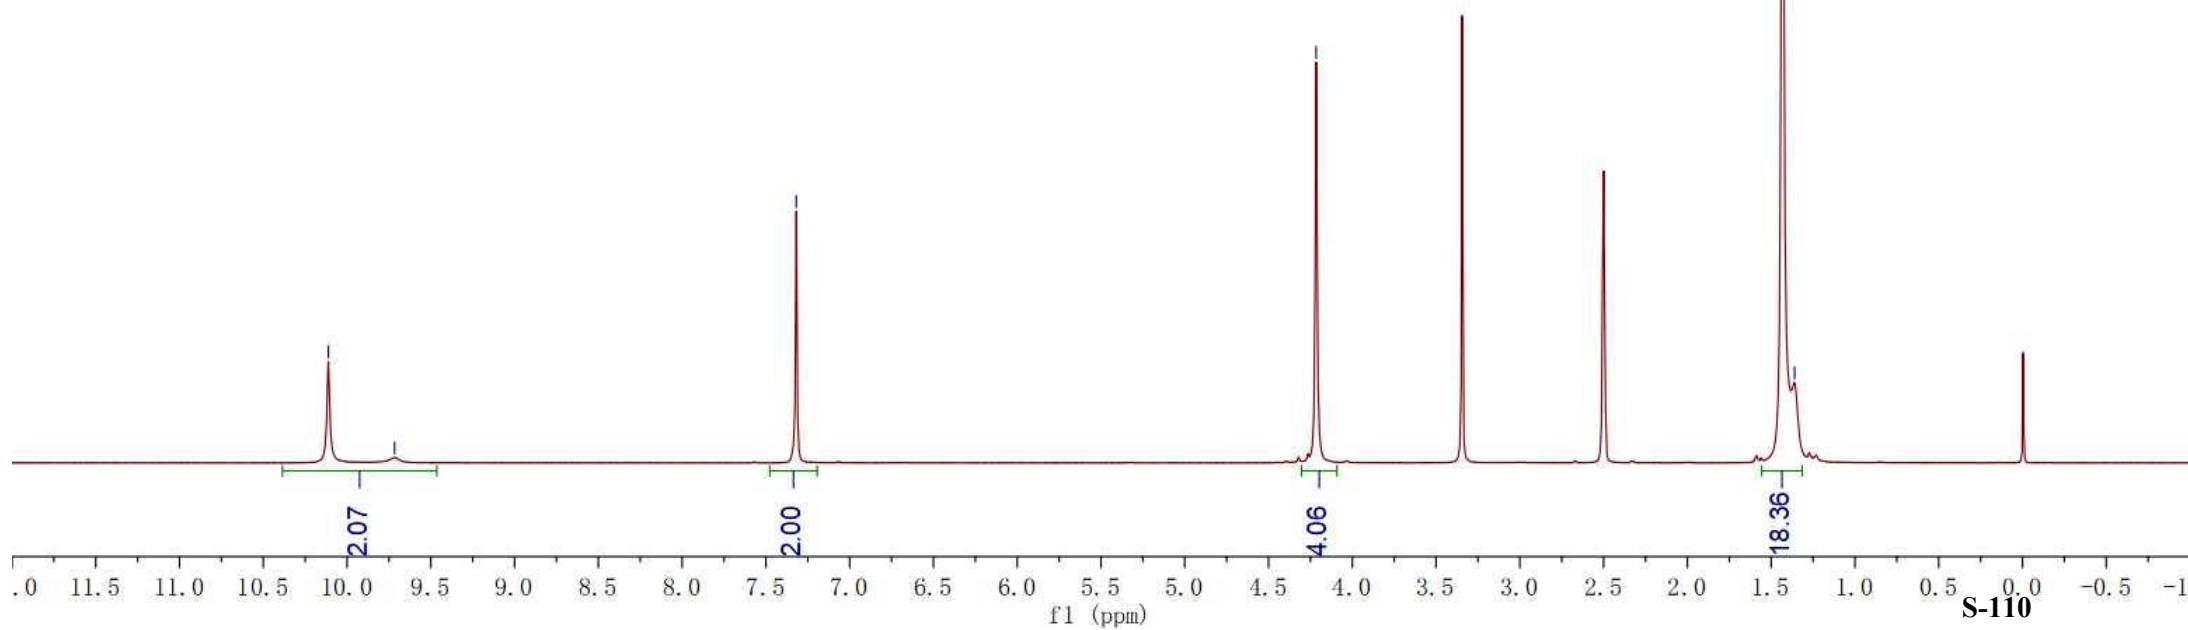

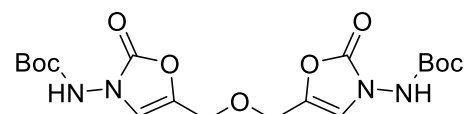

**3ah**;  $^{13}\text{C}\{^1\text{H}\}$  NMR  
(101 MHz,  $\text{DMSO}-d_6$ )

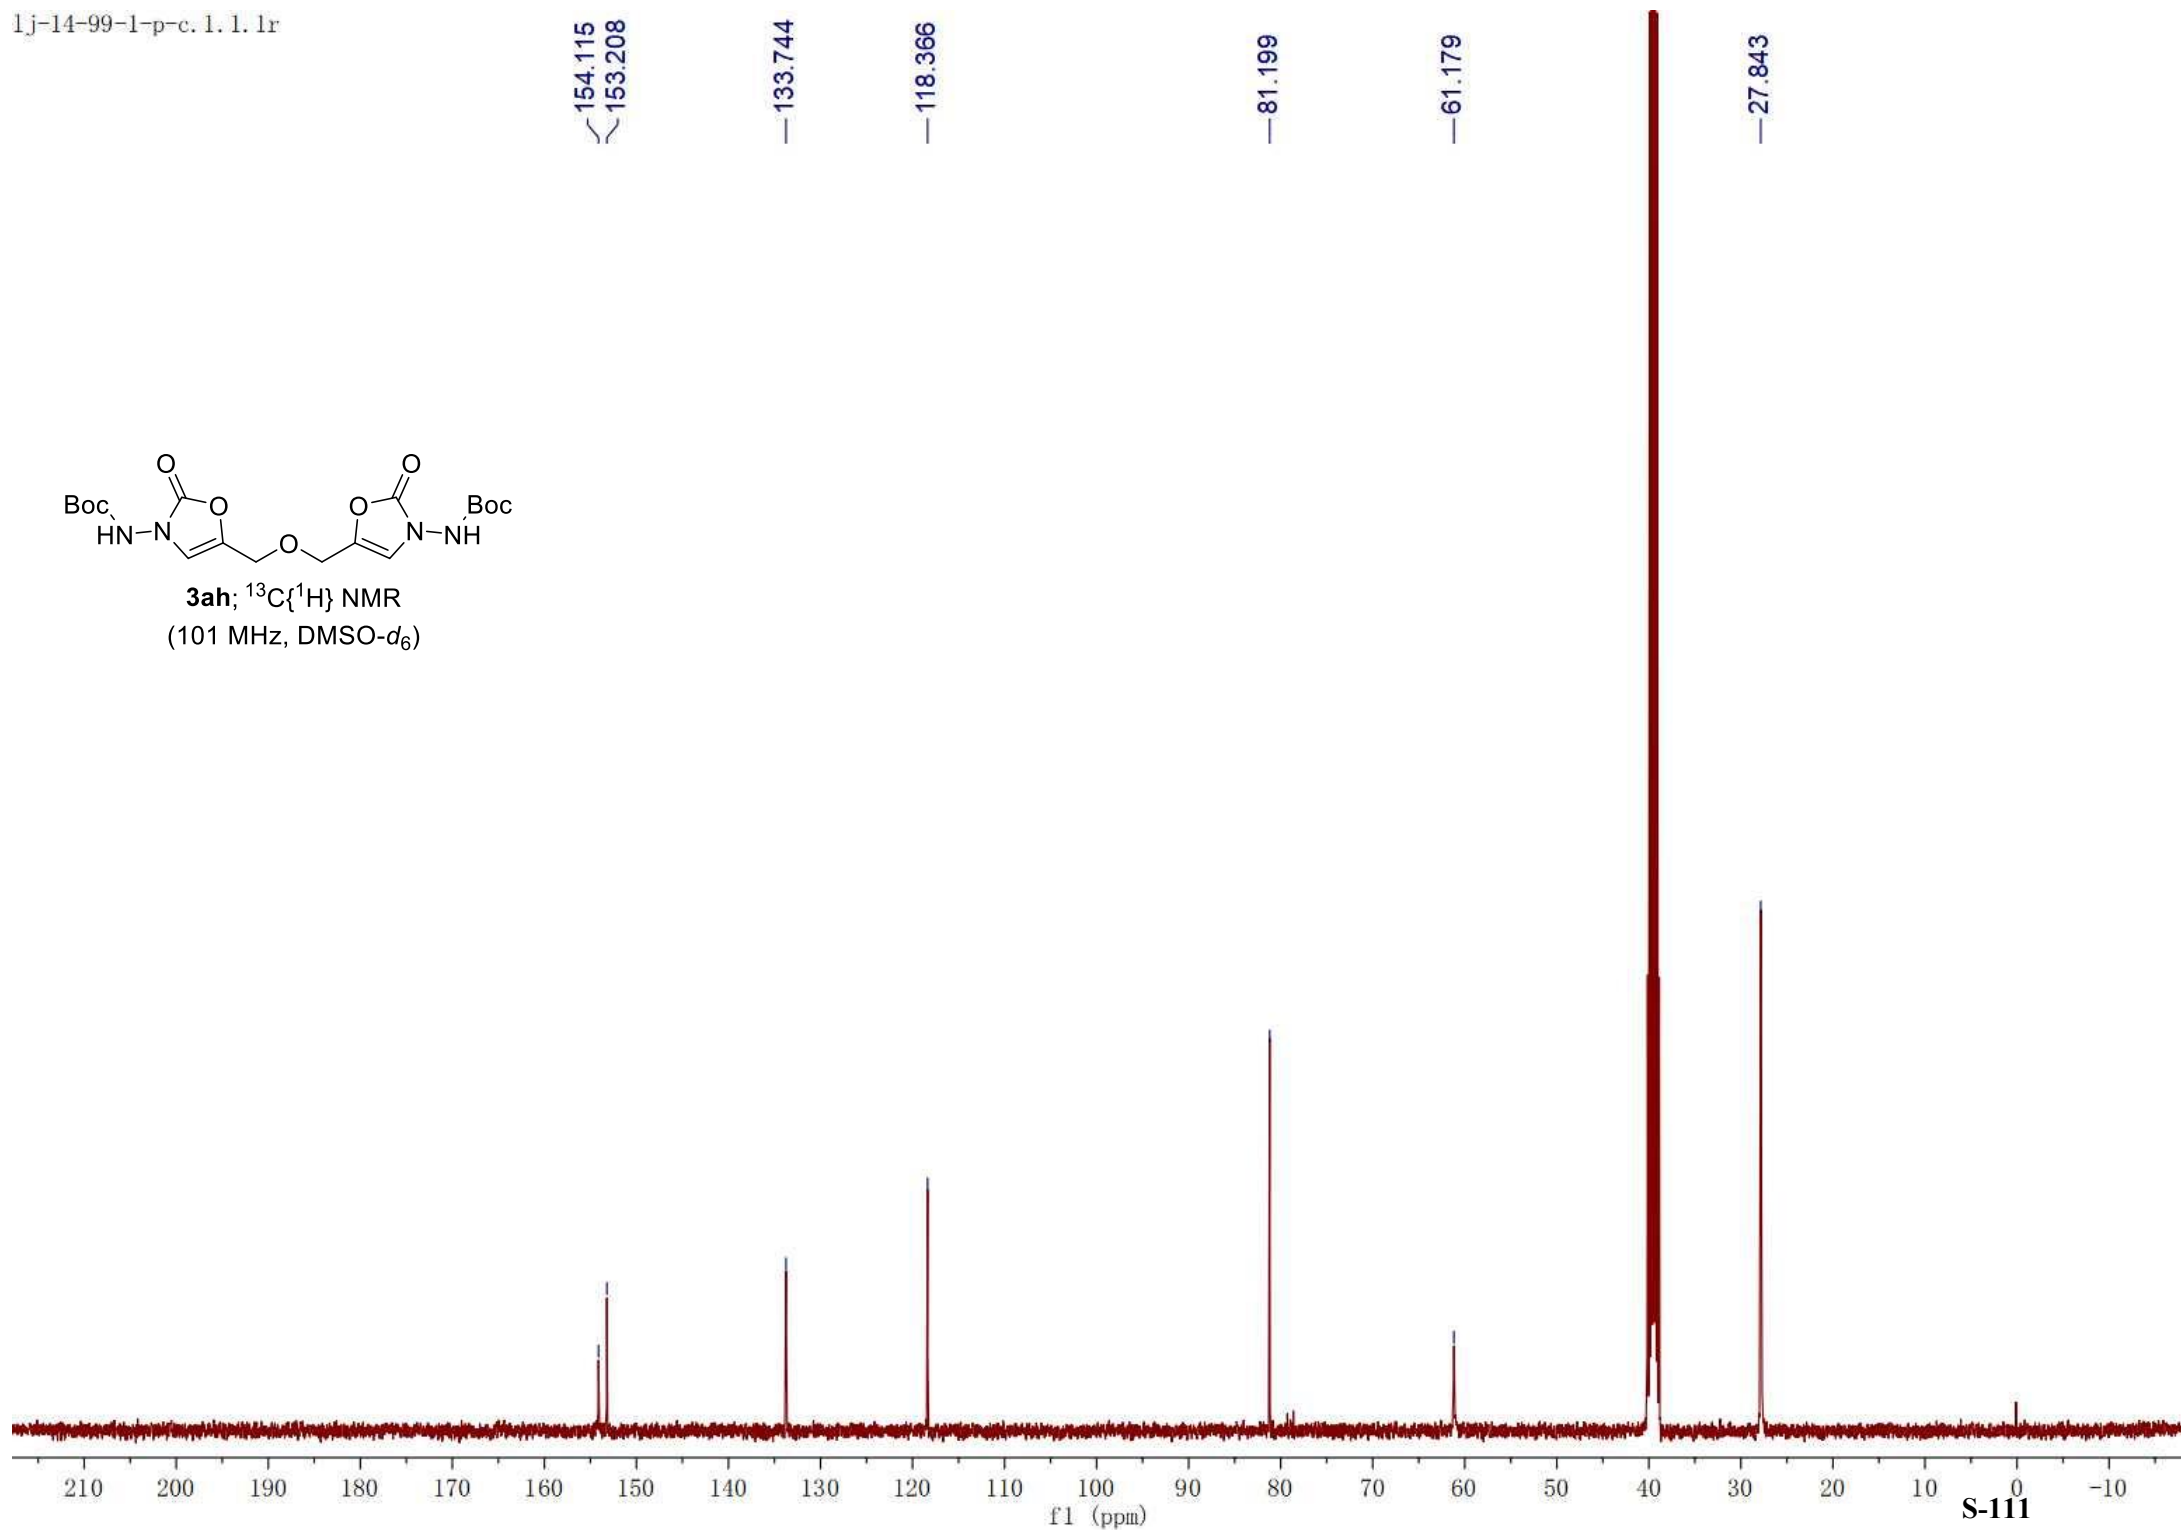

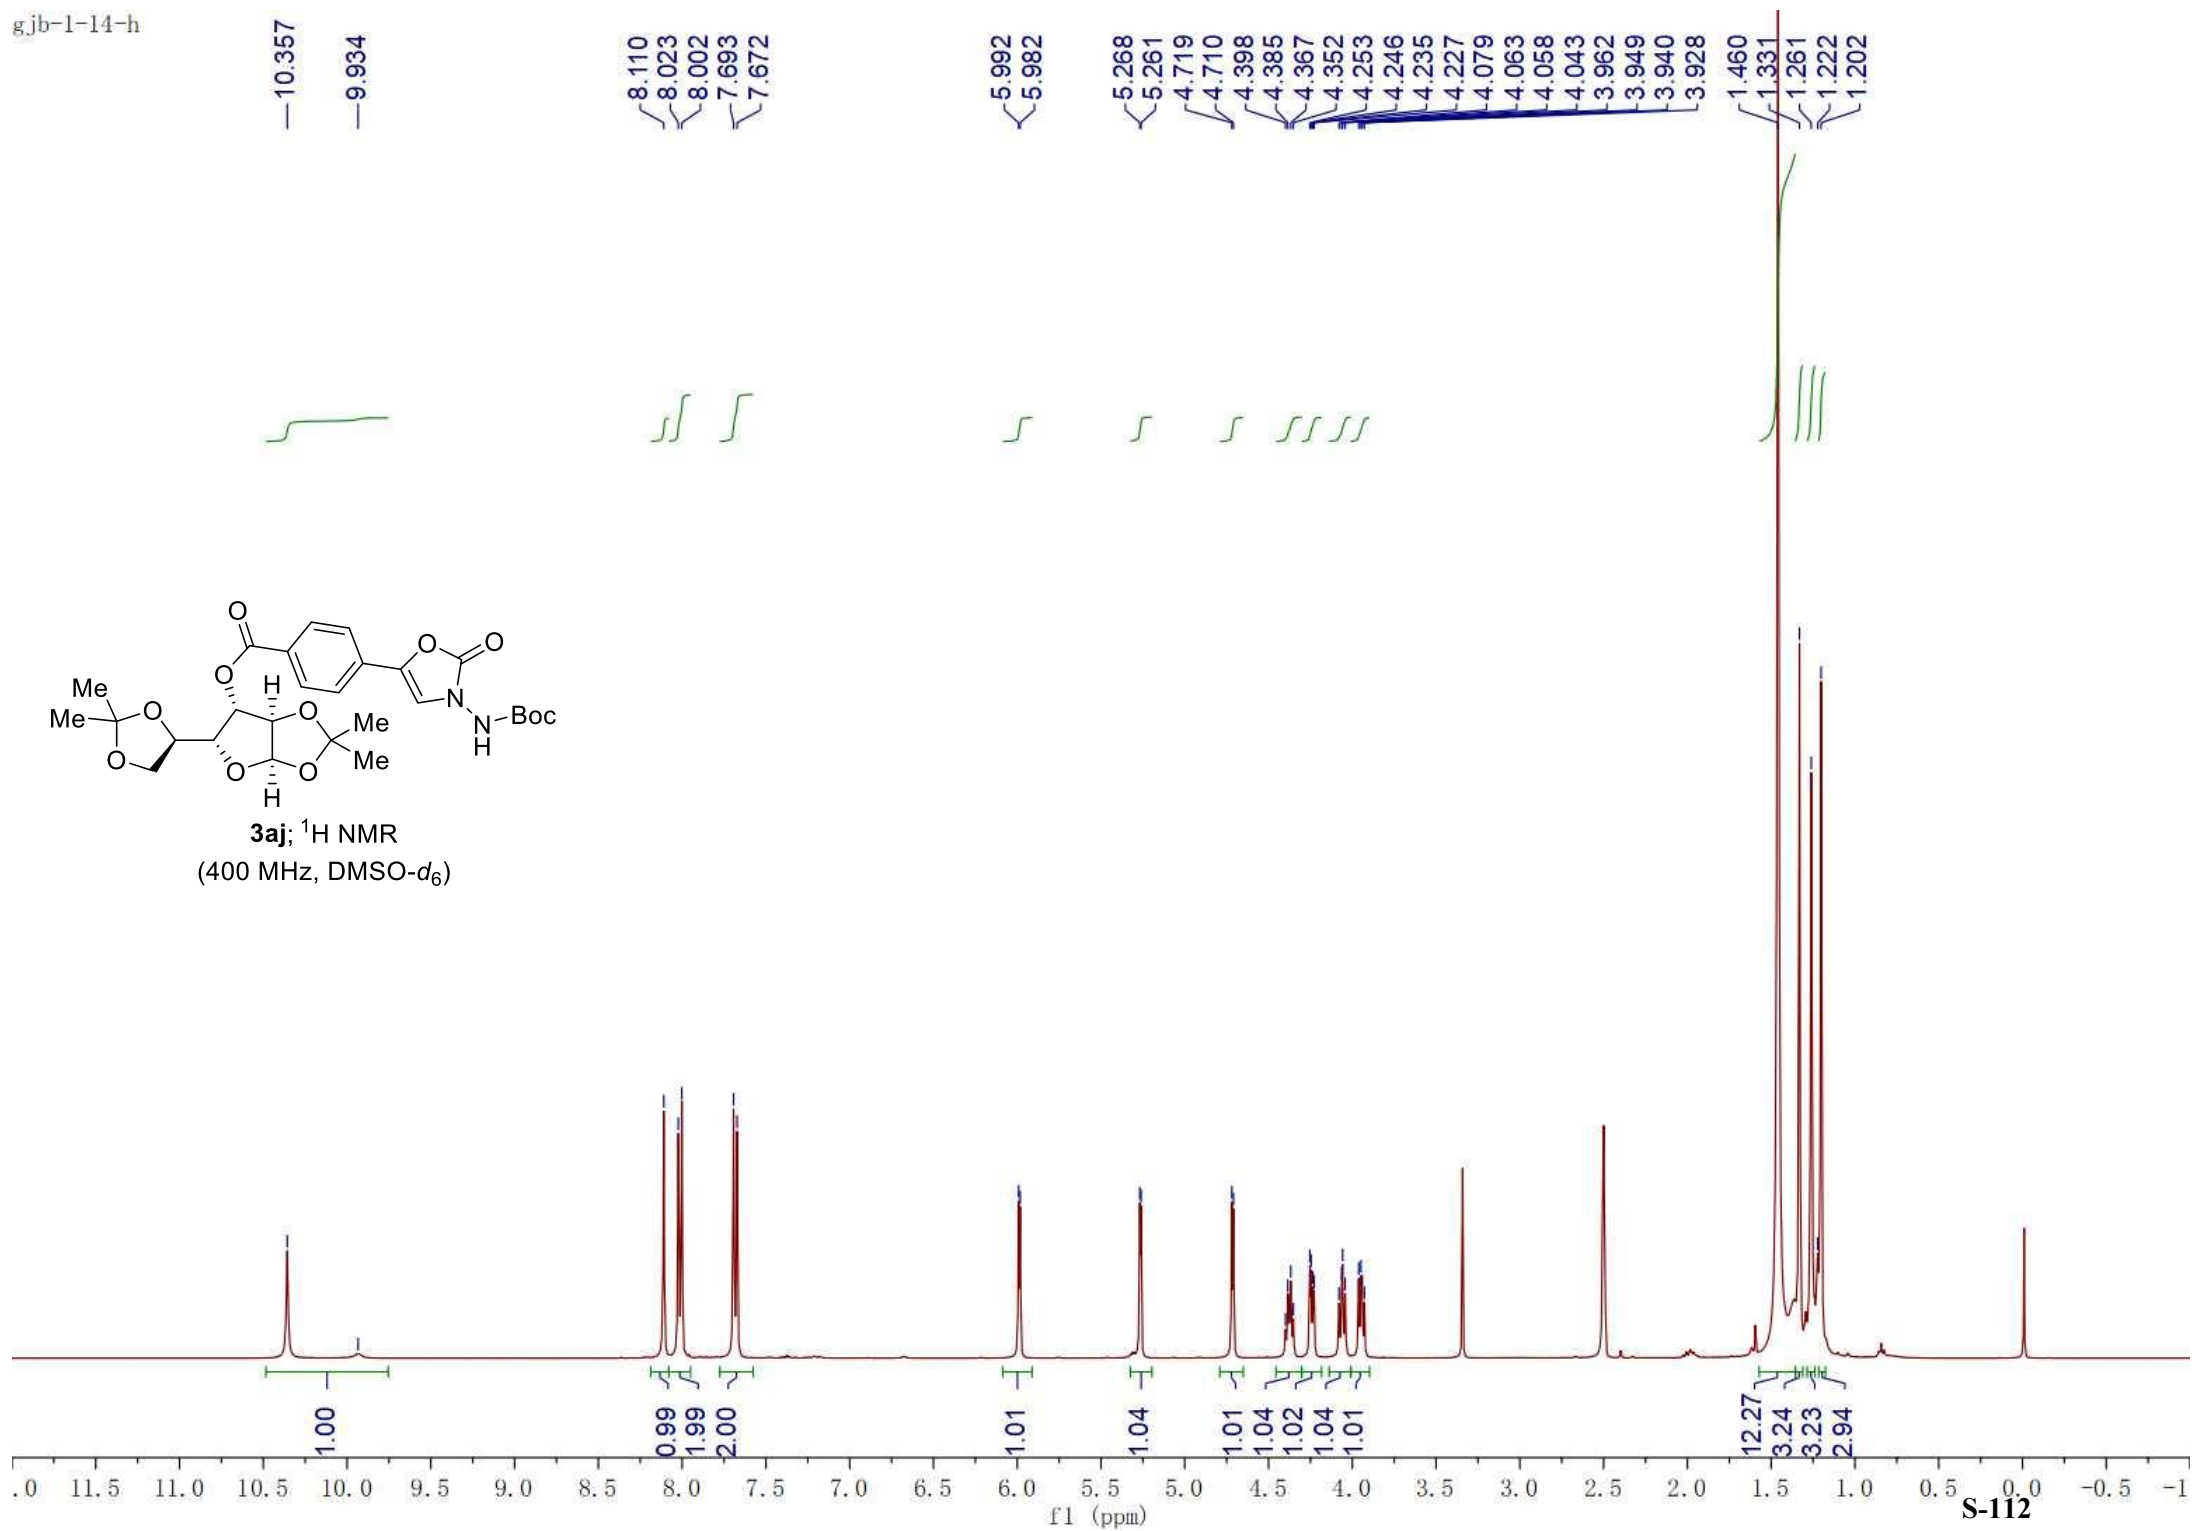

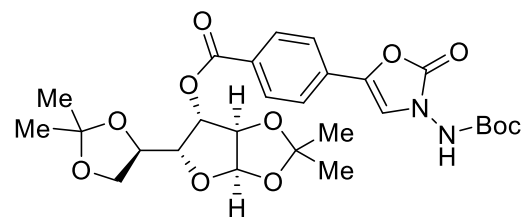

**3aj**;  $^{13}\text{C}\{^1\text{H}\}$  NMR  
(101 MHz, DMSO- $d_6$ )

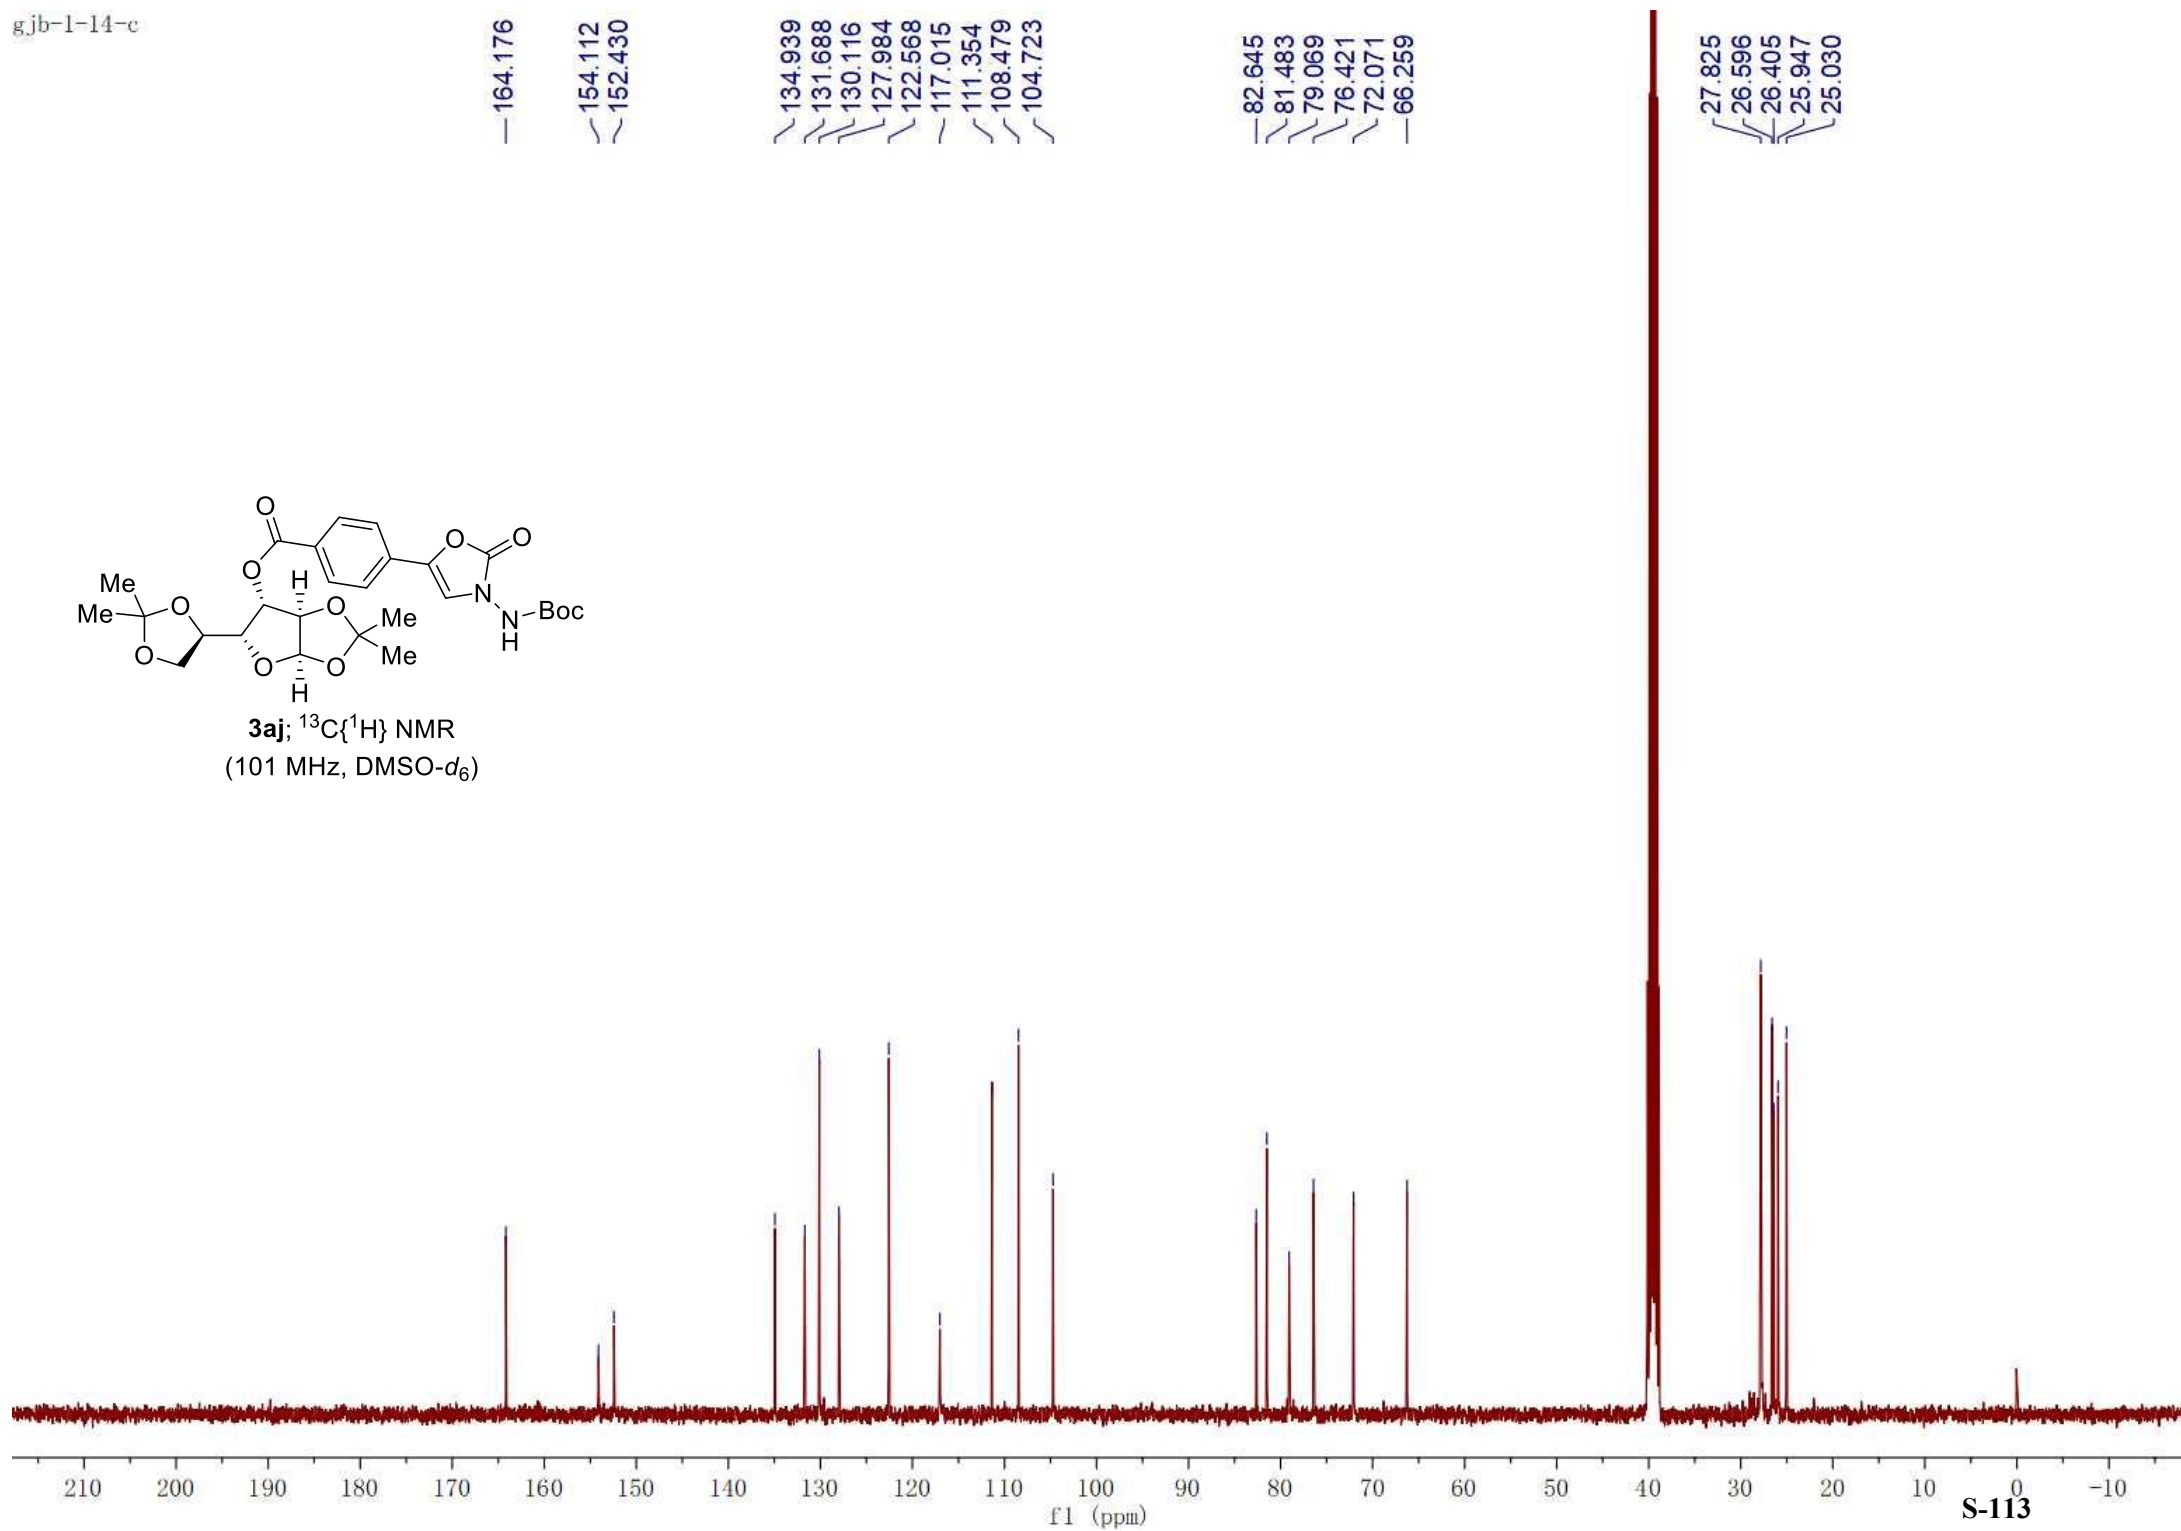

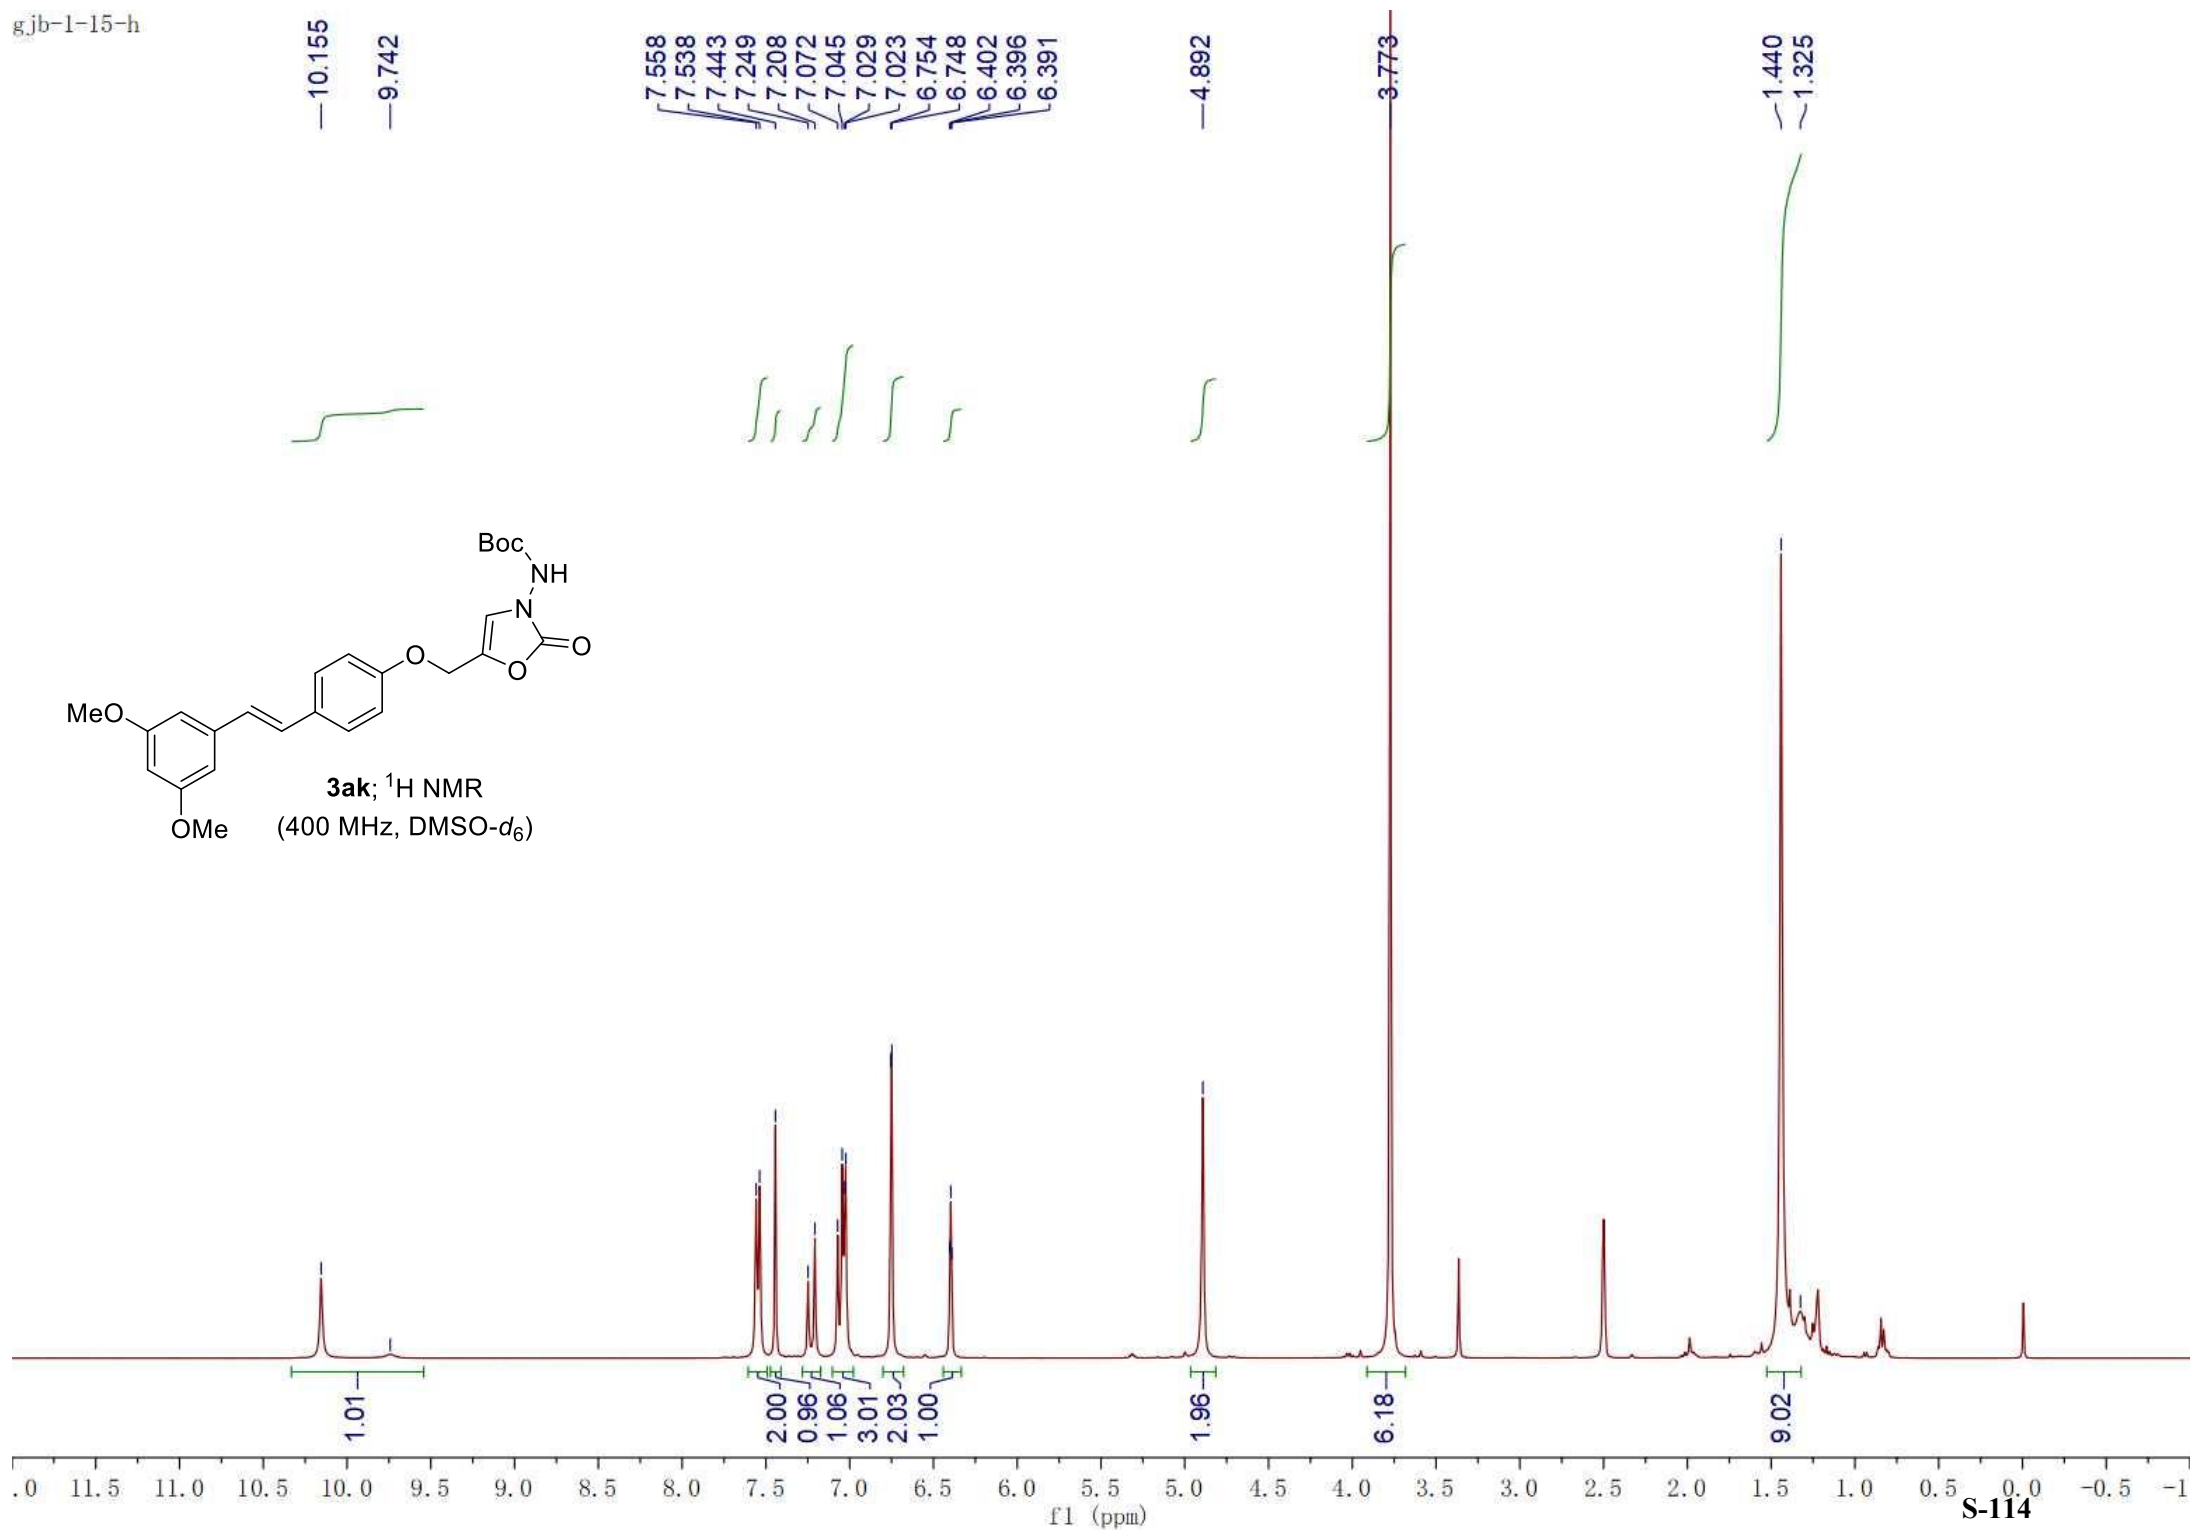

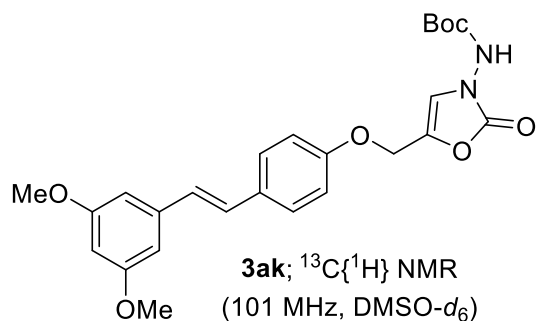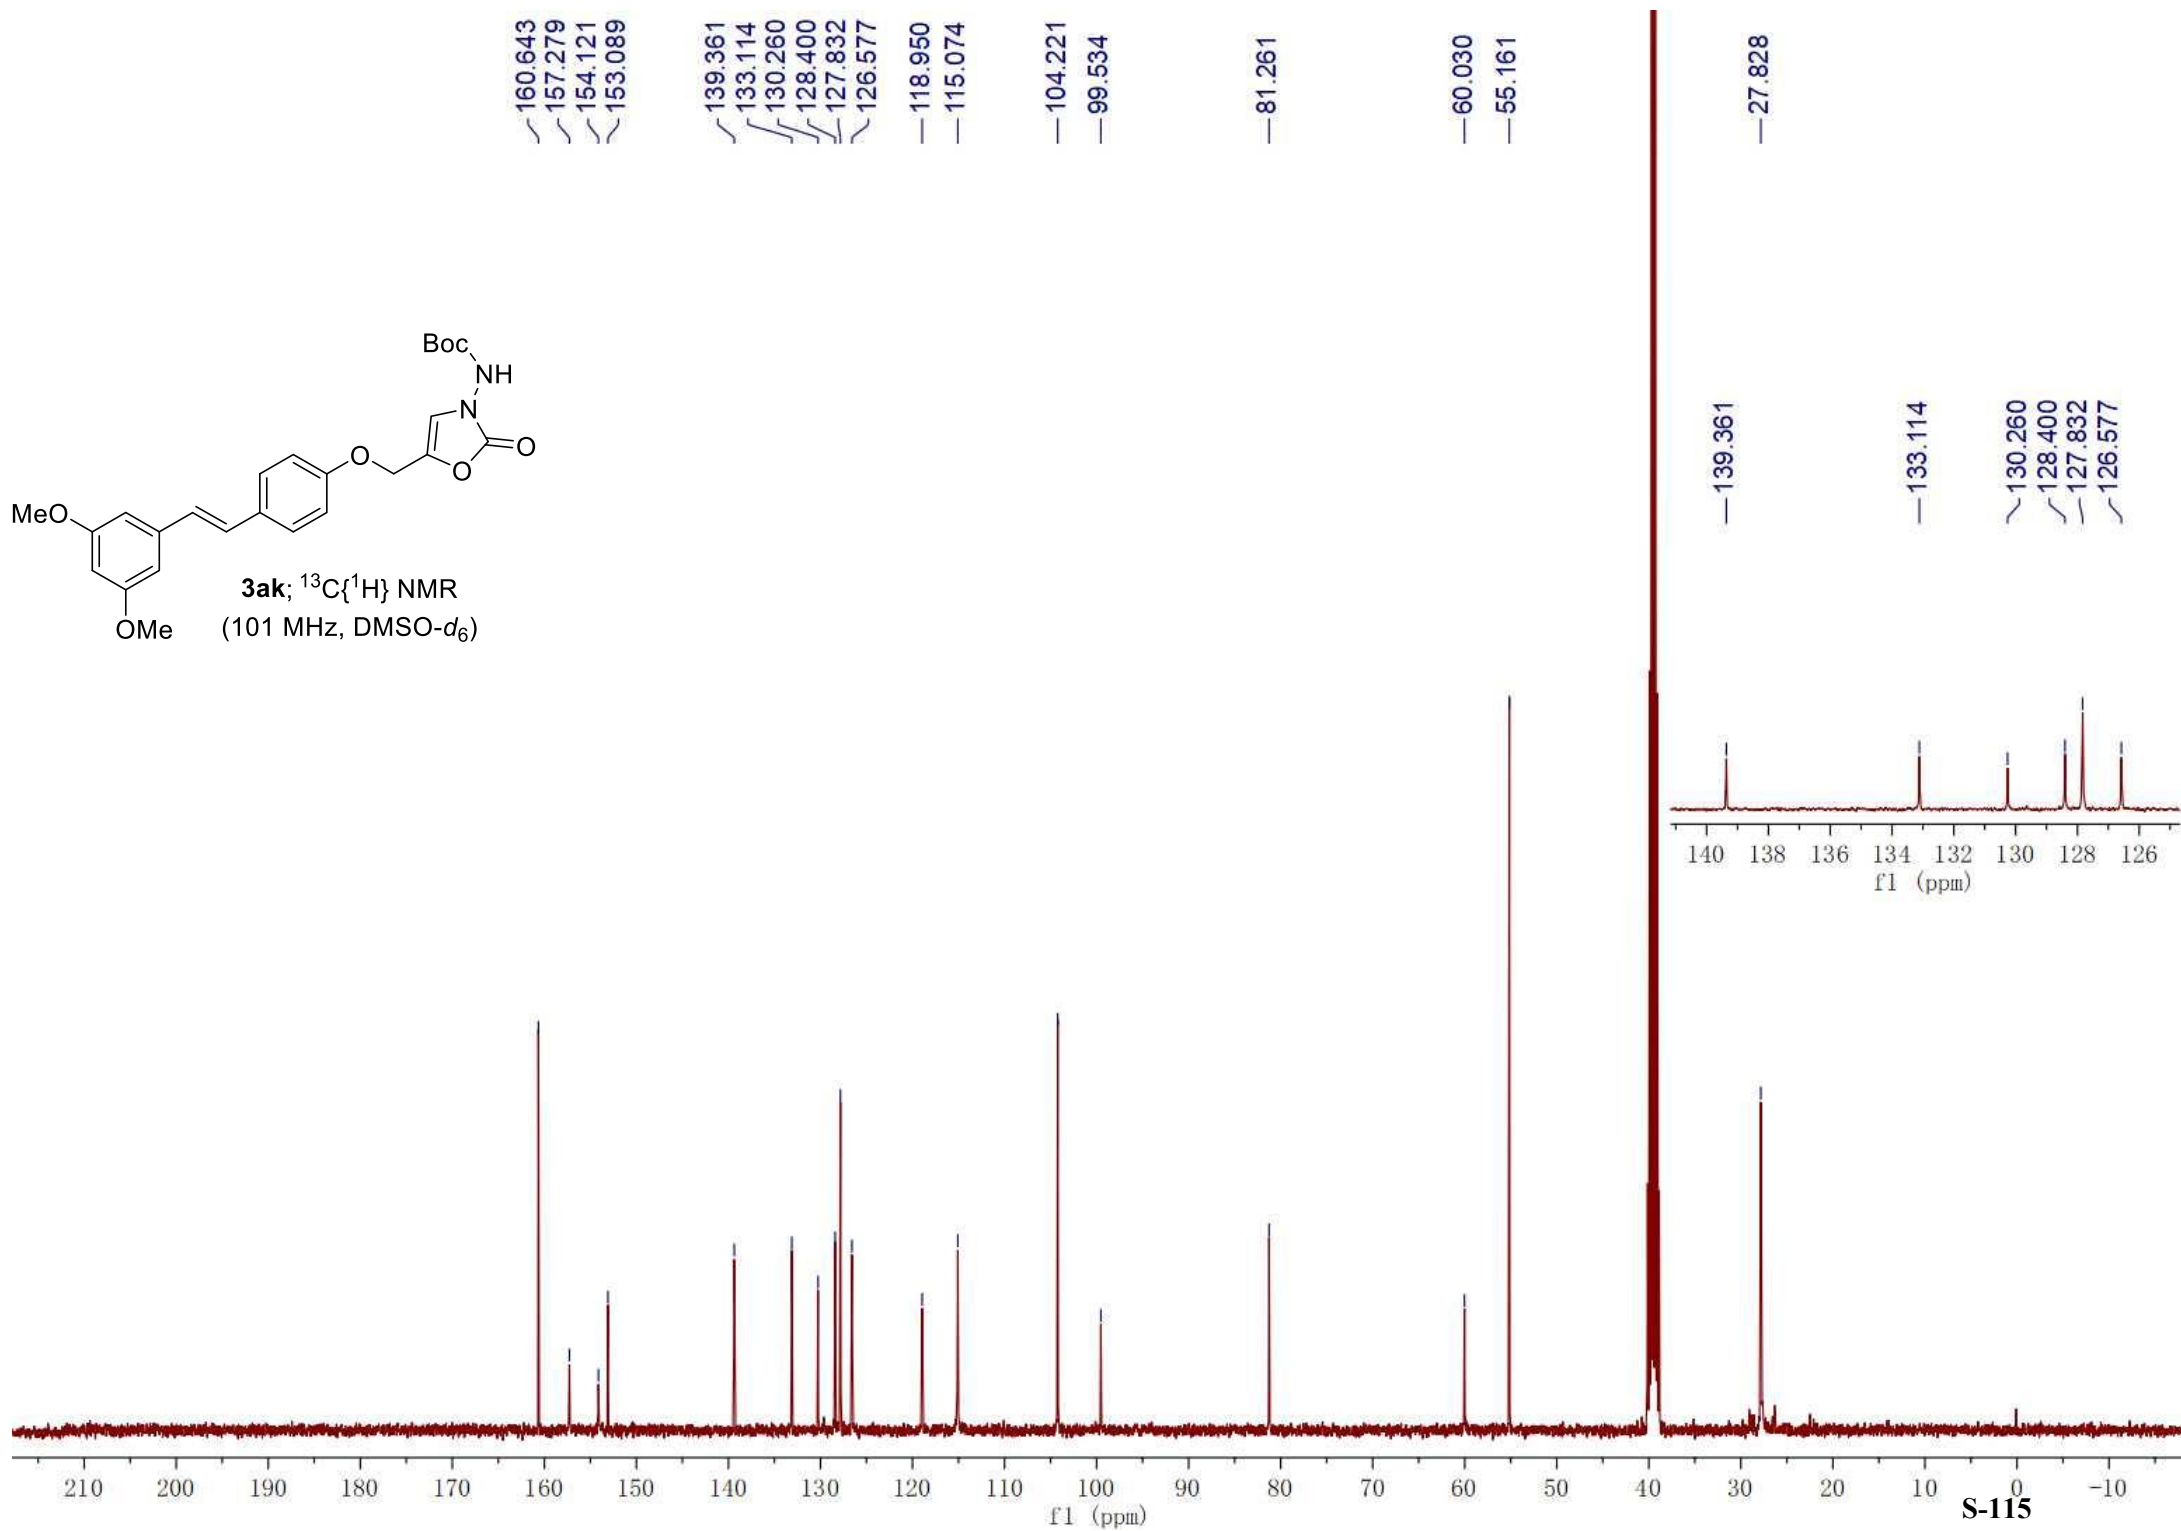

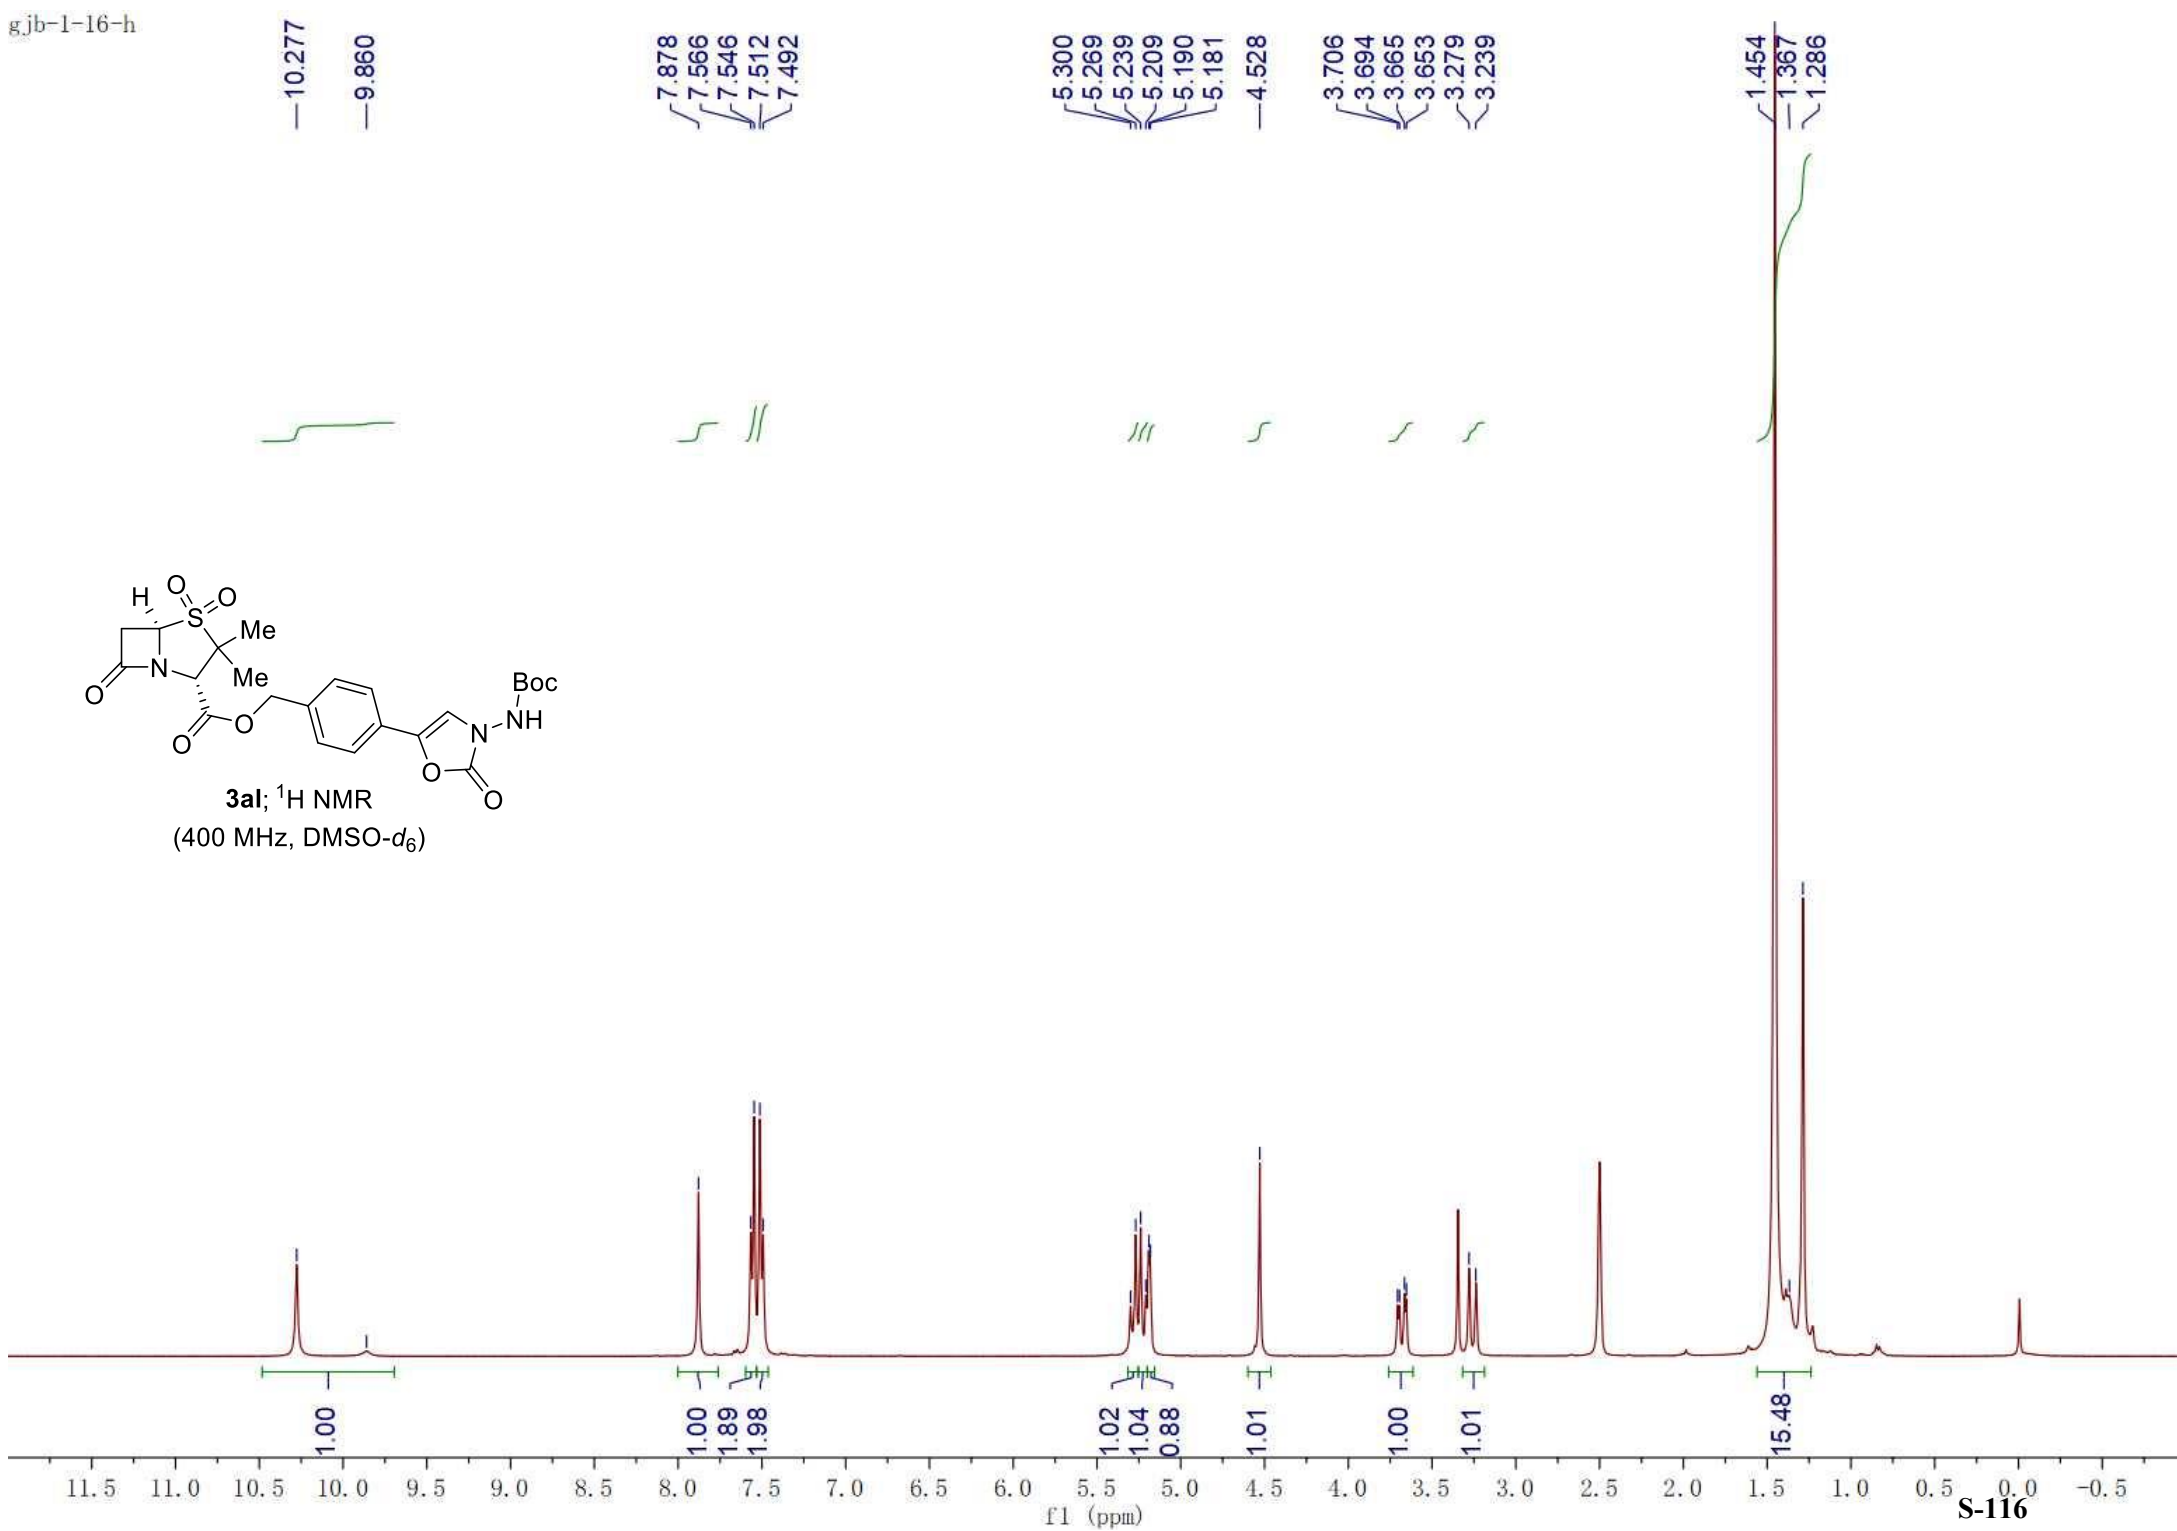



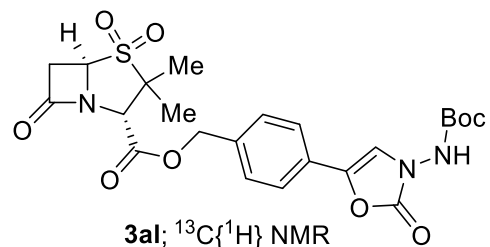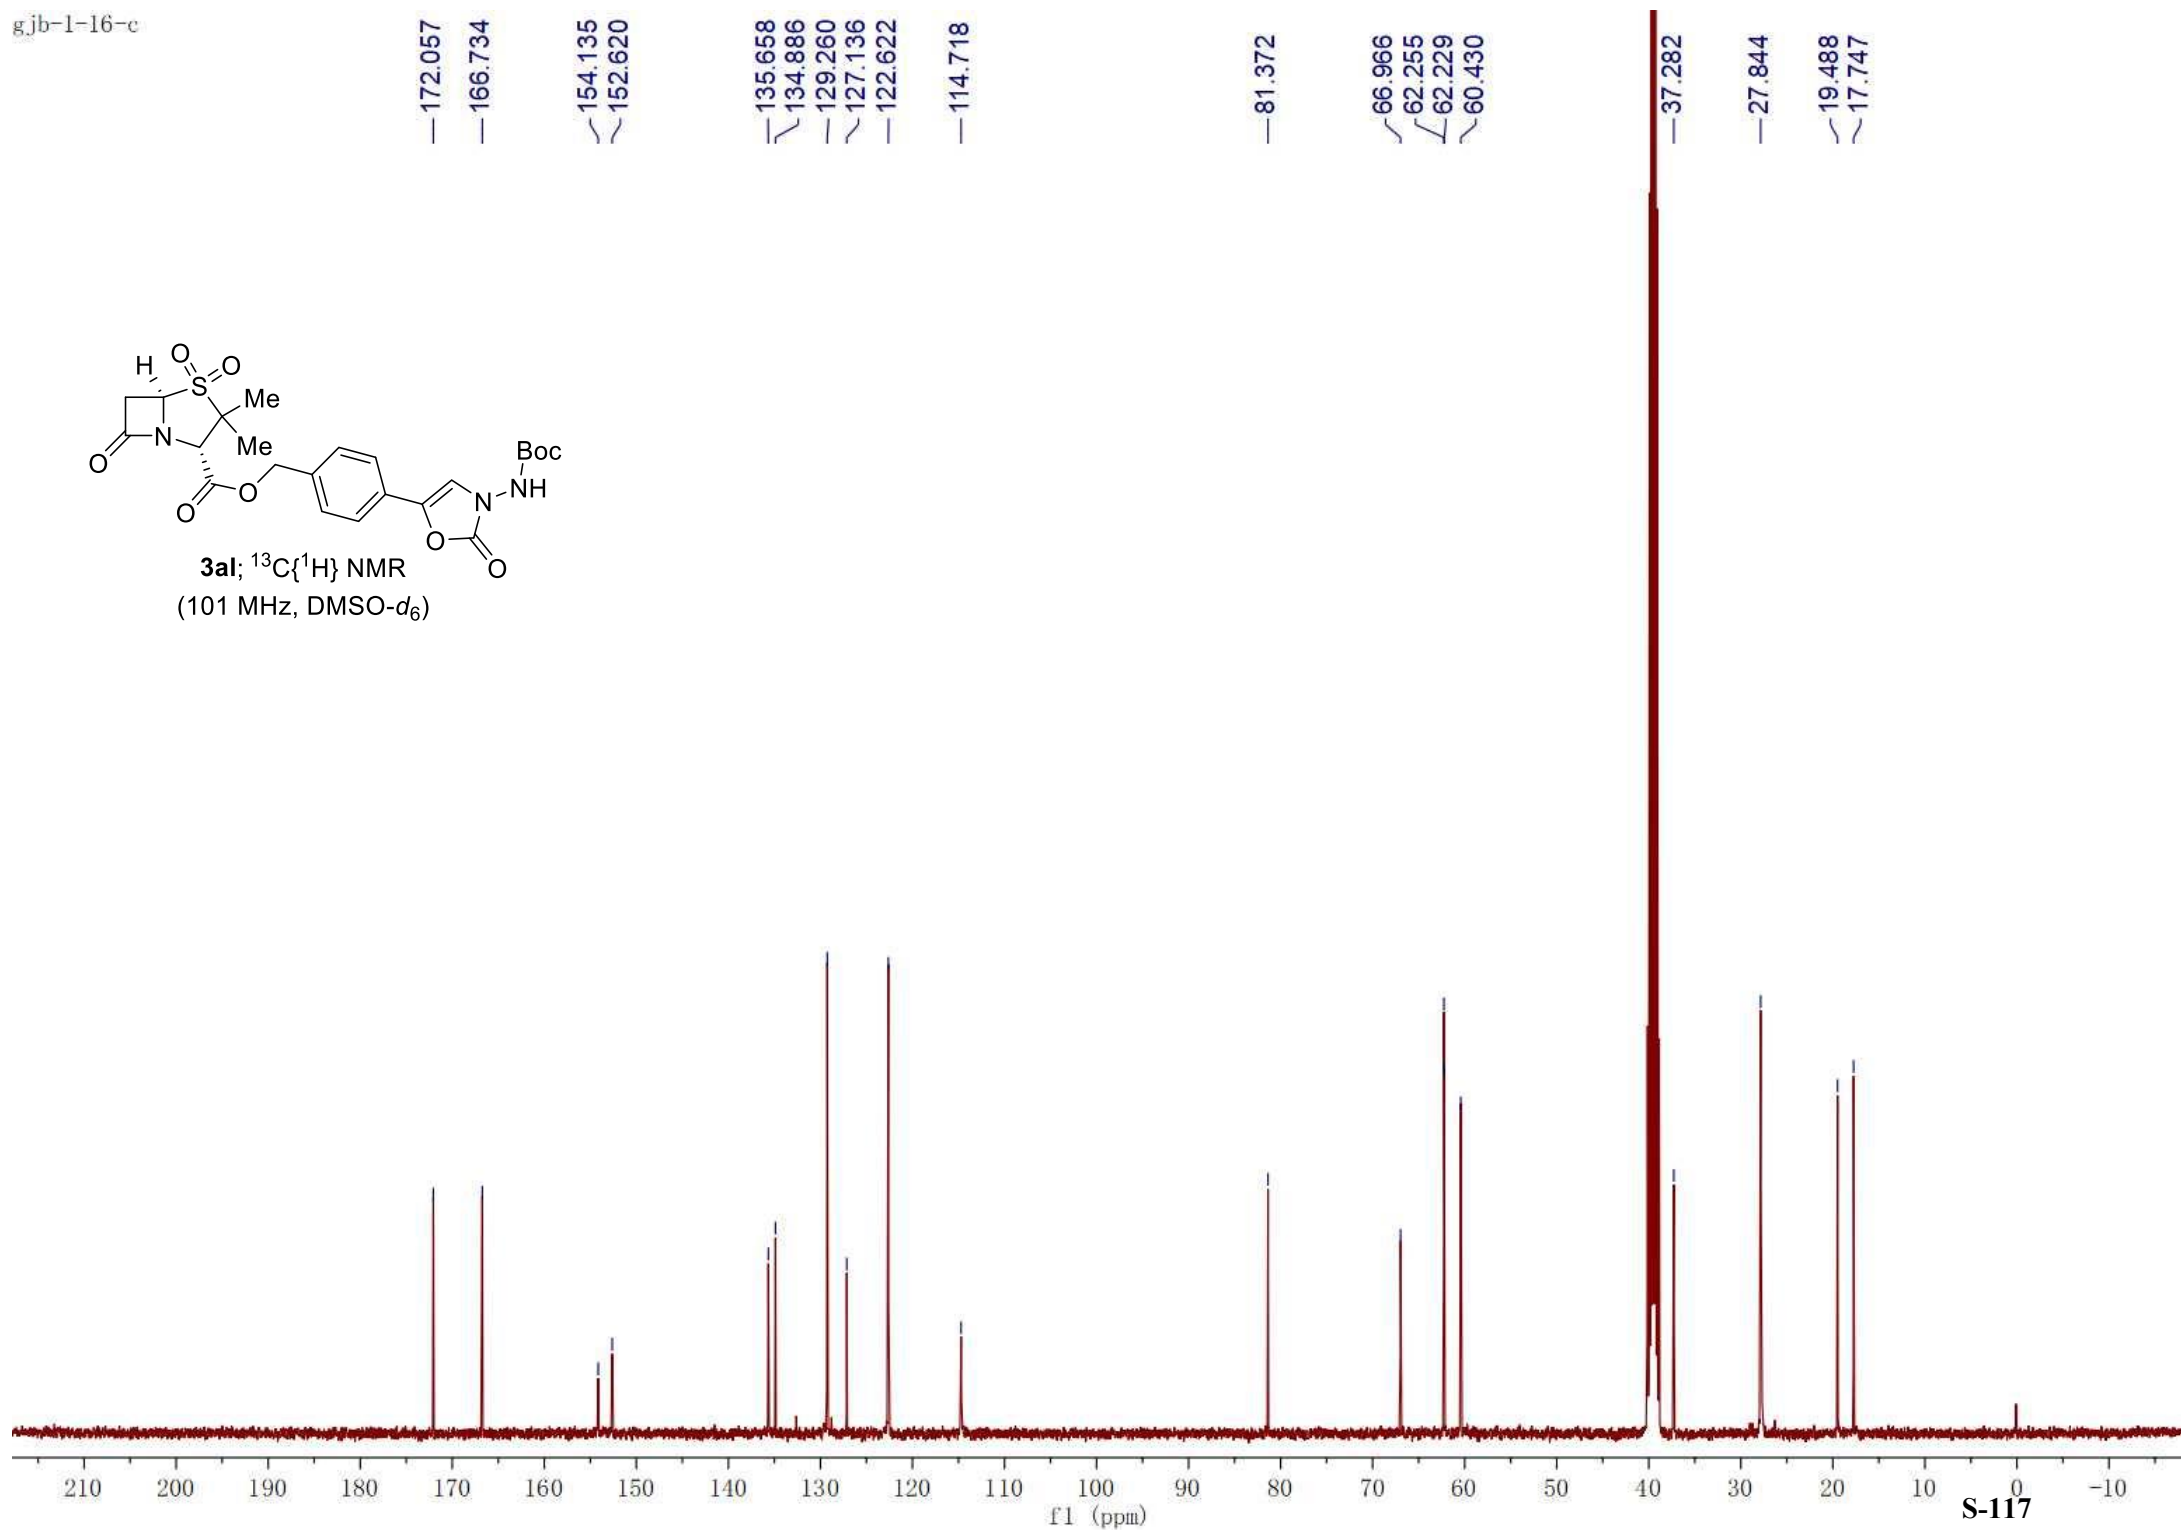

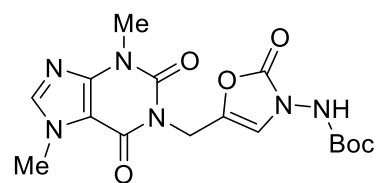

**3am**;  $^1\text{H}$  NMR  
(400 MHz,  $\text{DMSO}-d_6$ )

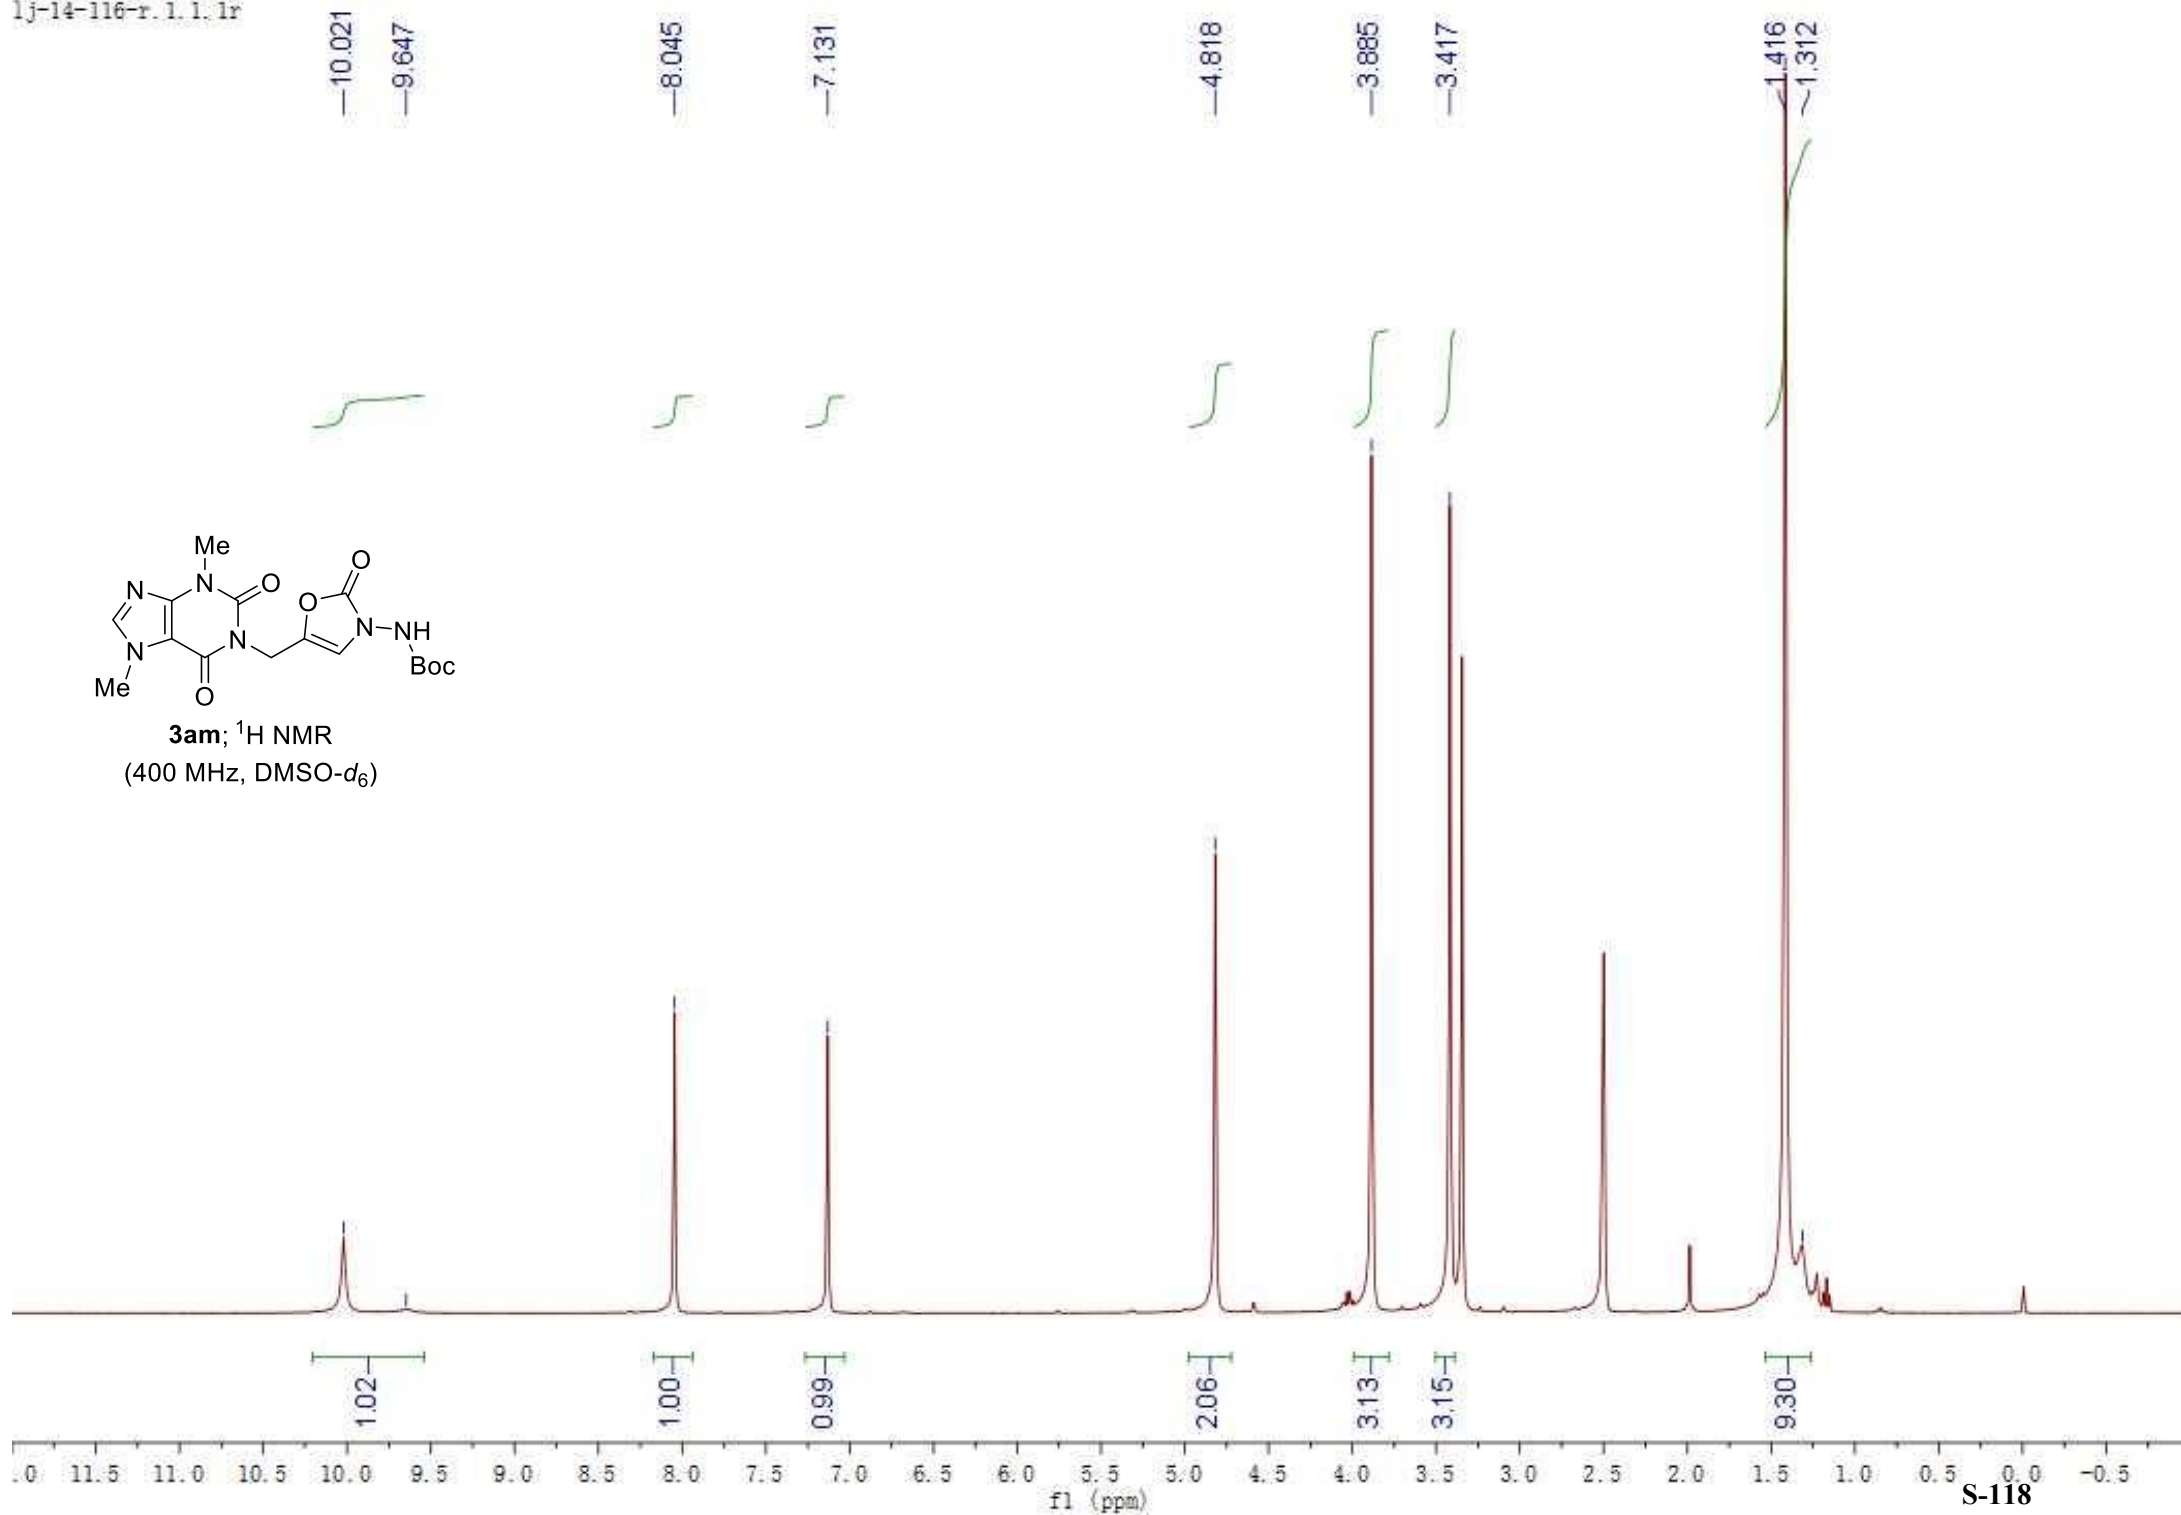

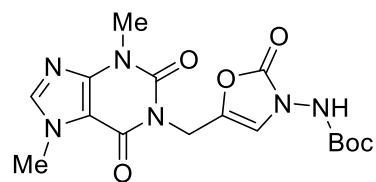

**3am**;  $^{13}\text{C}\{^1\text{H}\}$  NMR  
(101 MHz,  $\text{DMSO-}d_6$ )

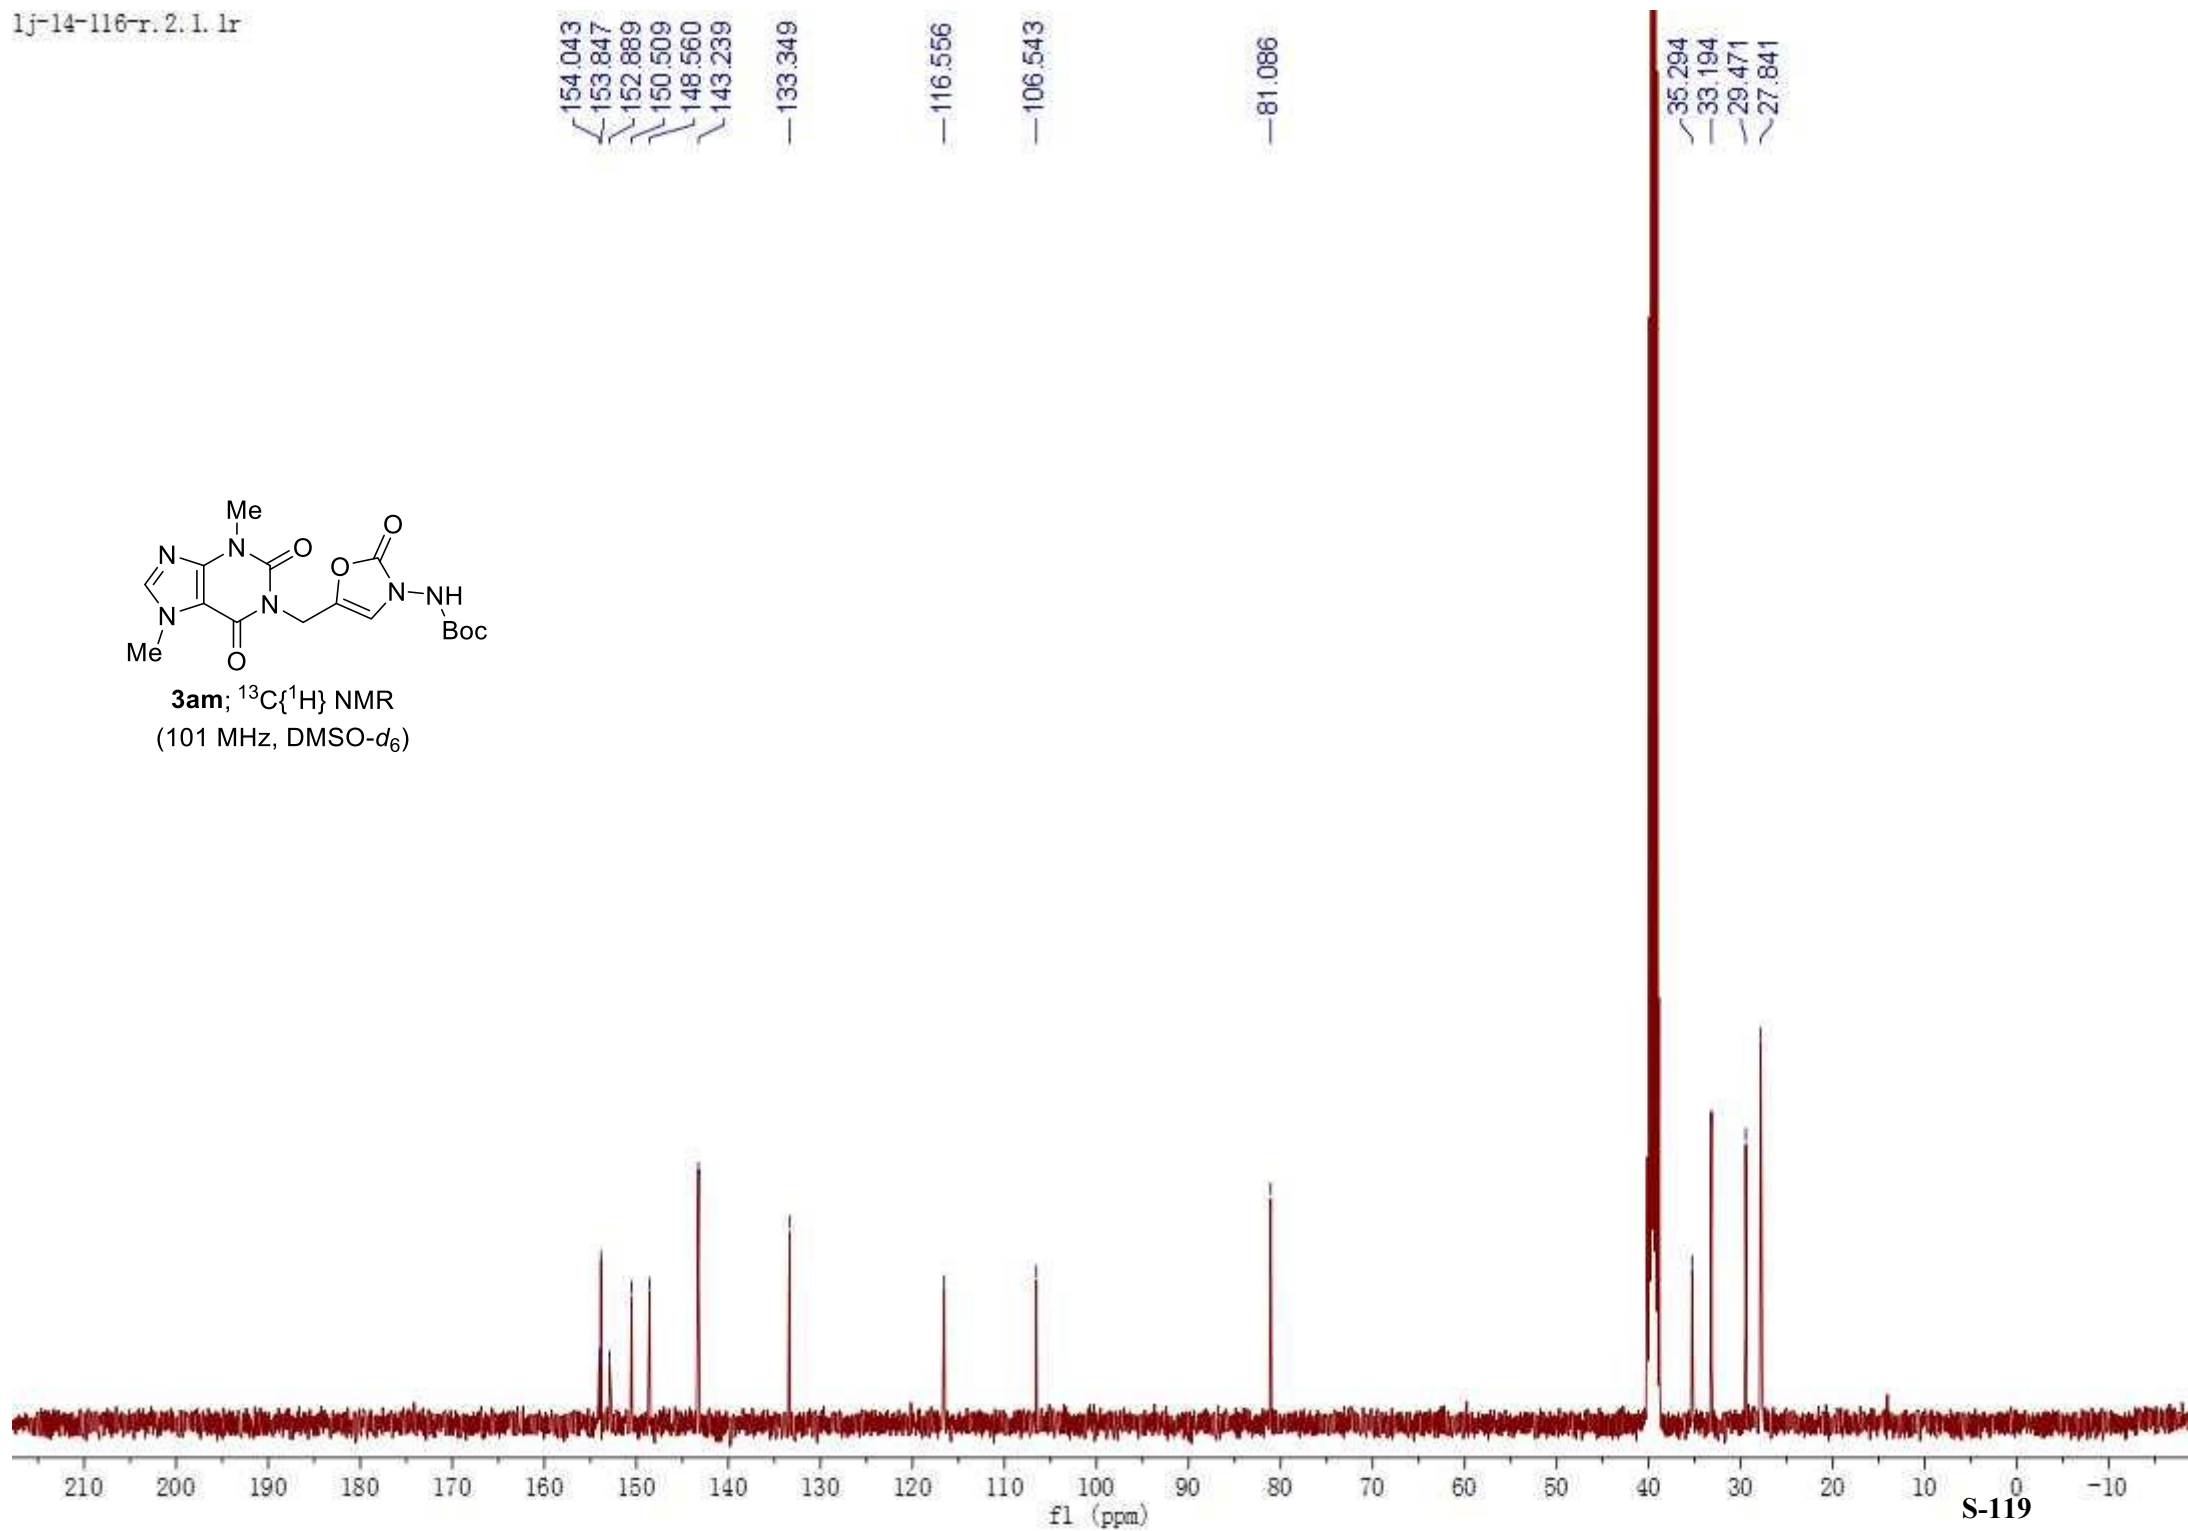

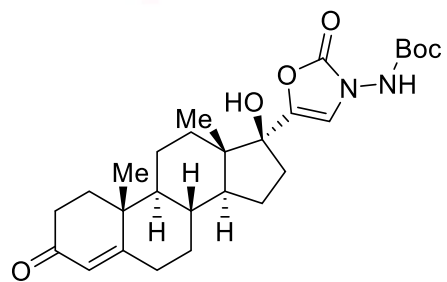

**3an**;  $^1\text{H}$  NMR  
(400 MHz,  $\text{DMSO}-d_6$ )

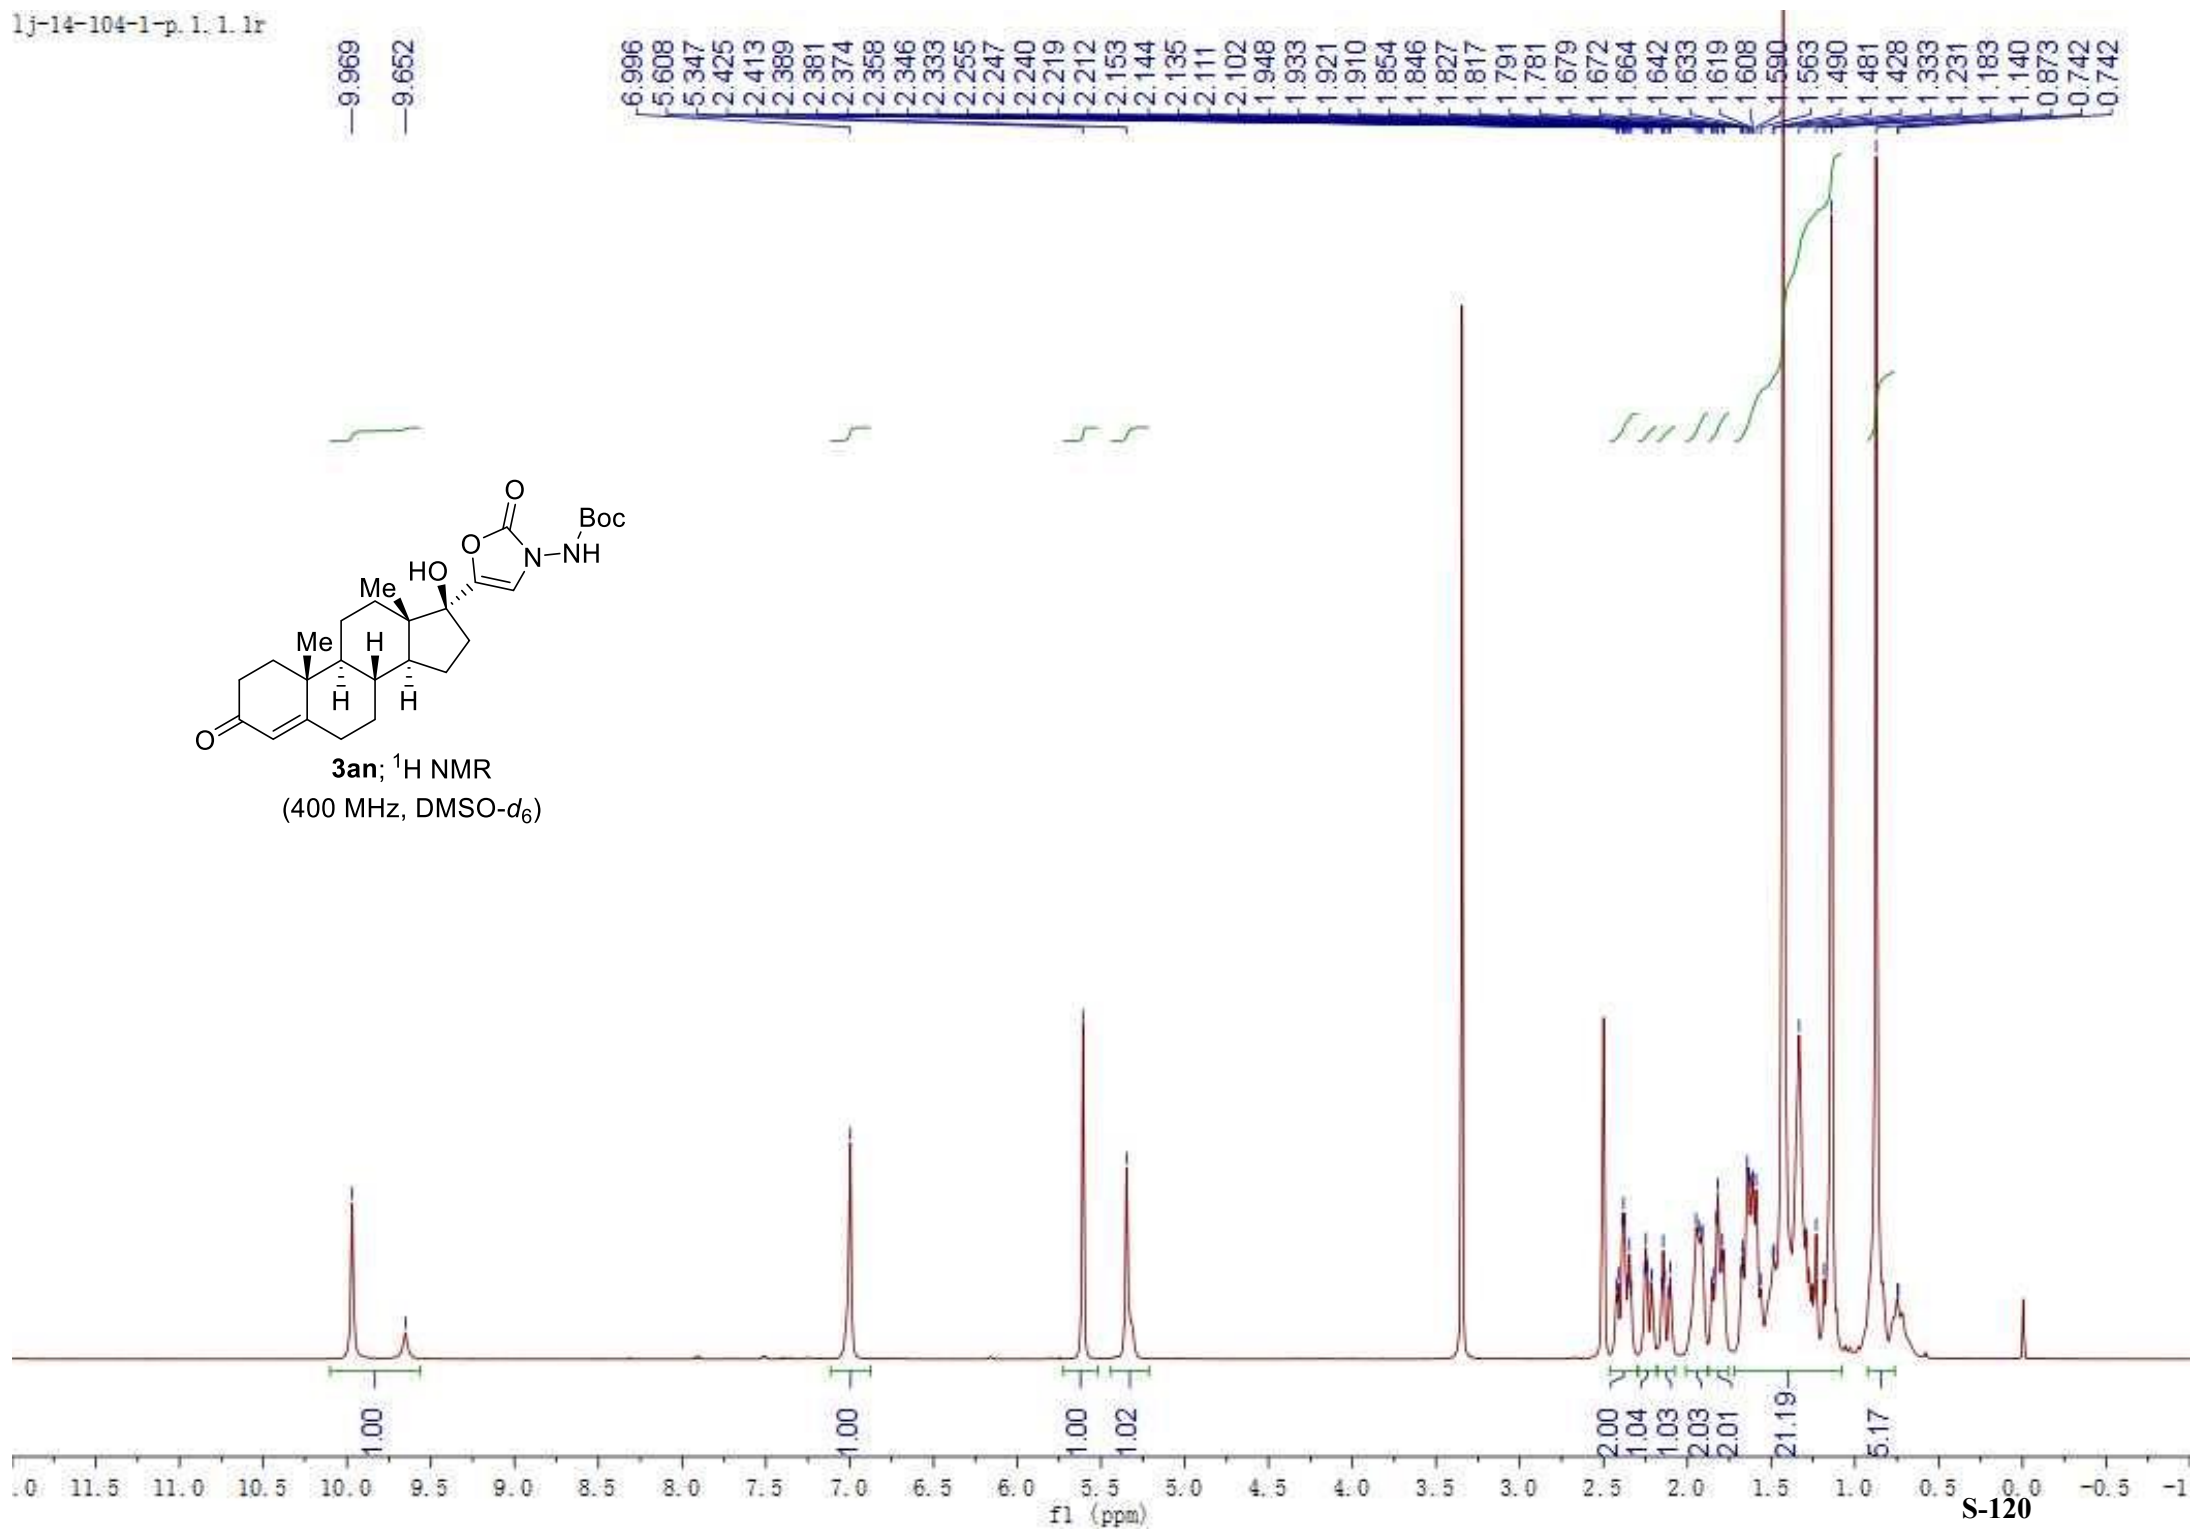

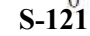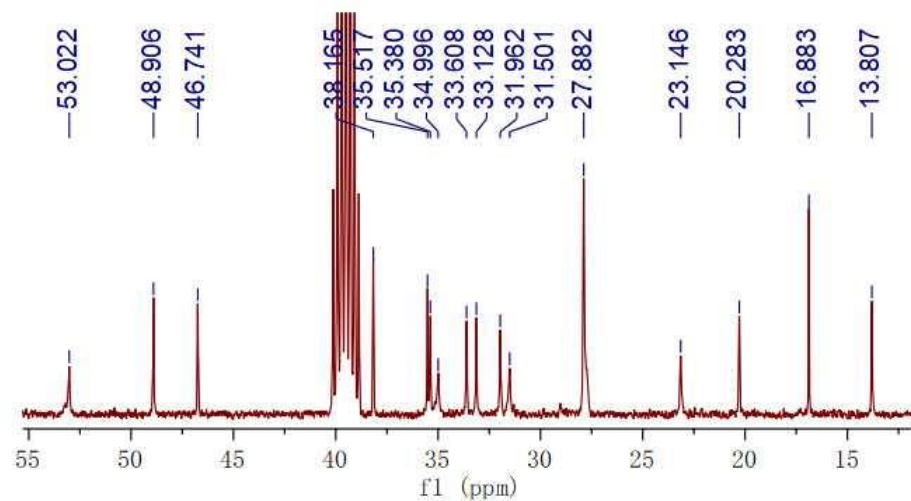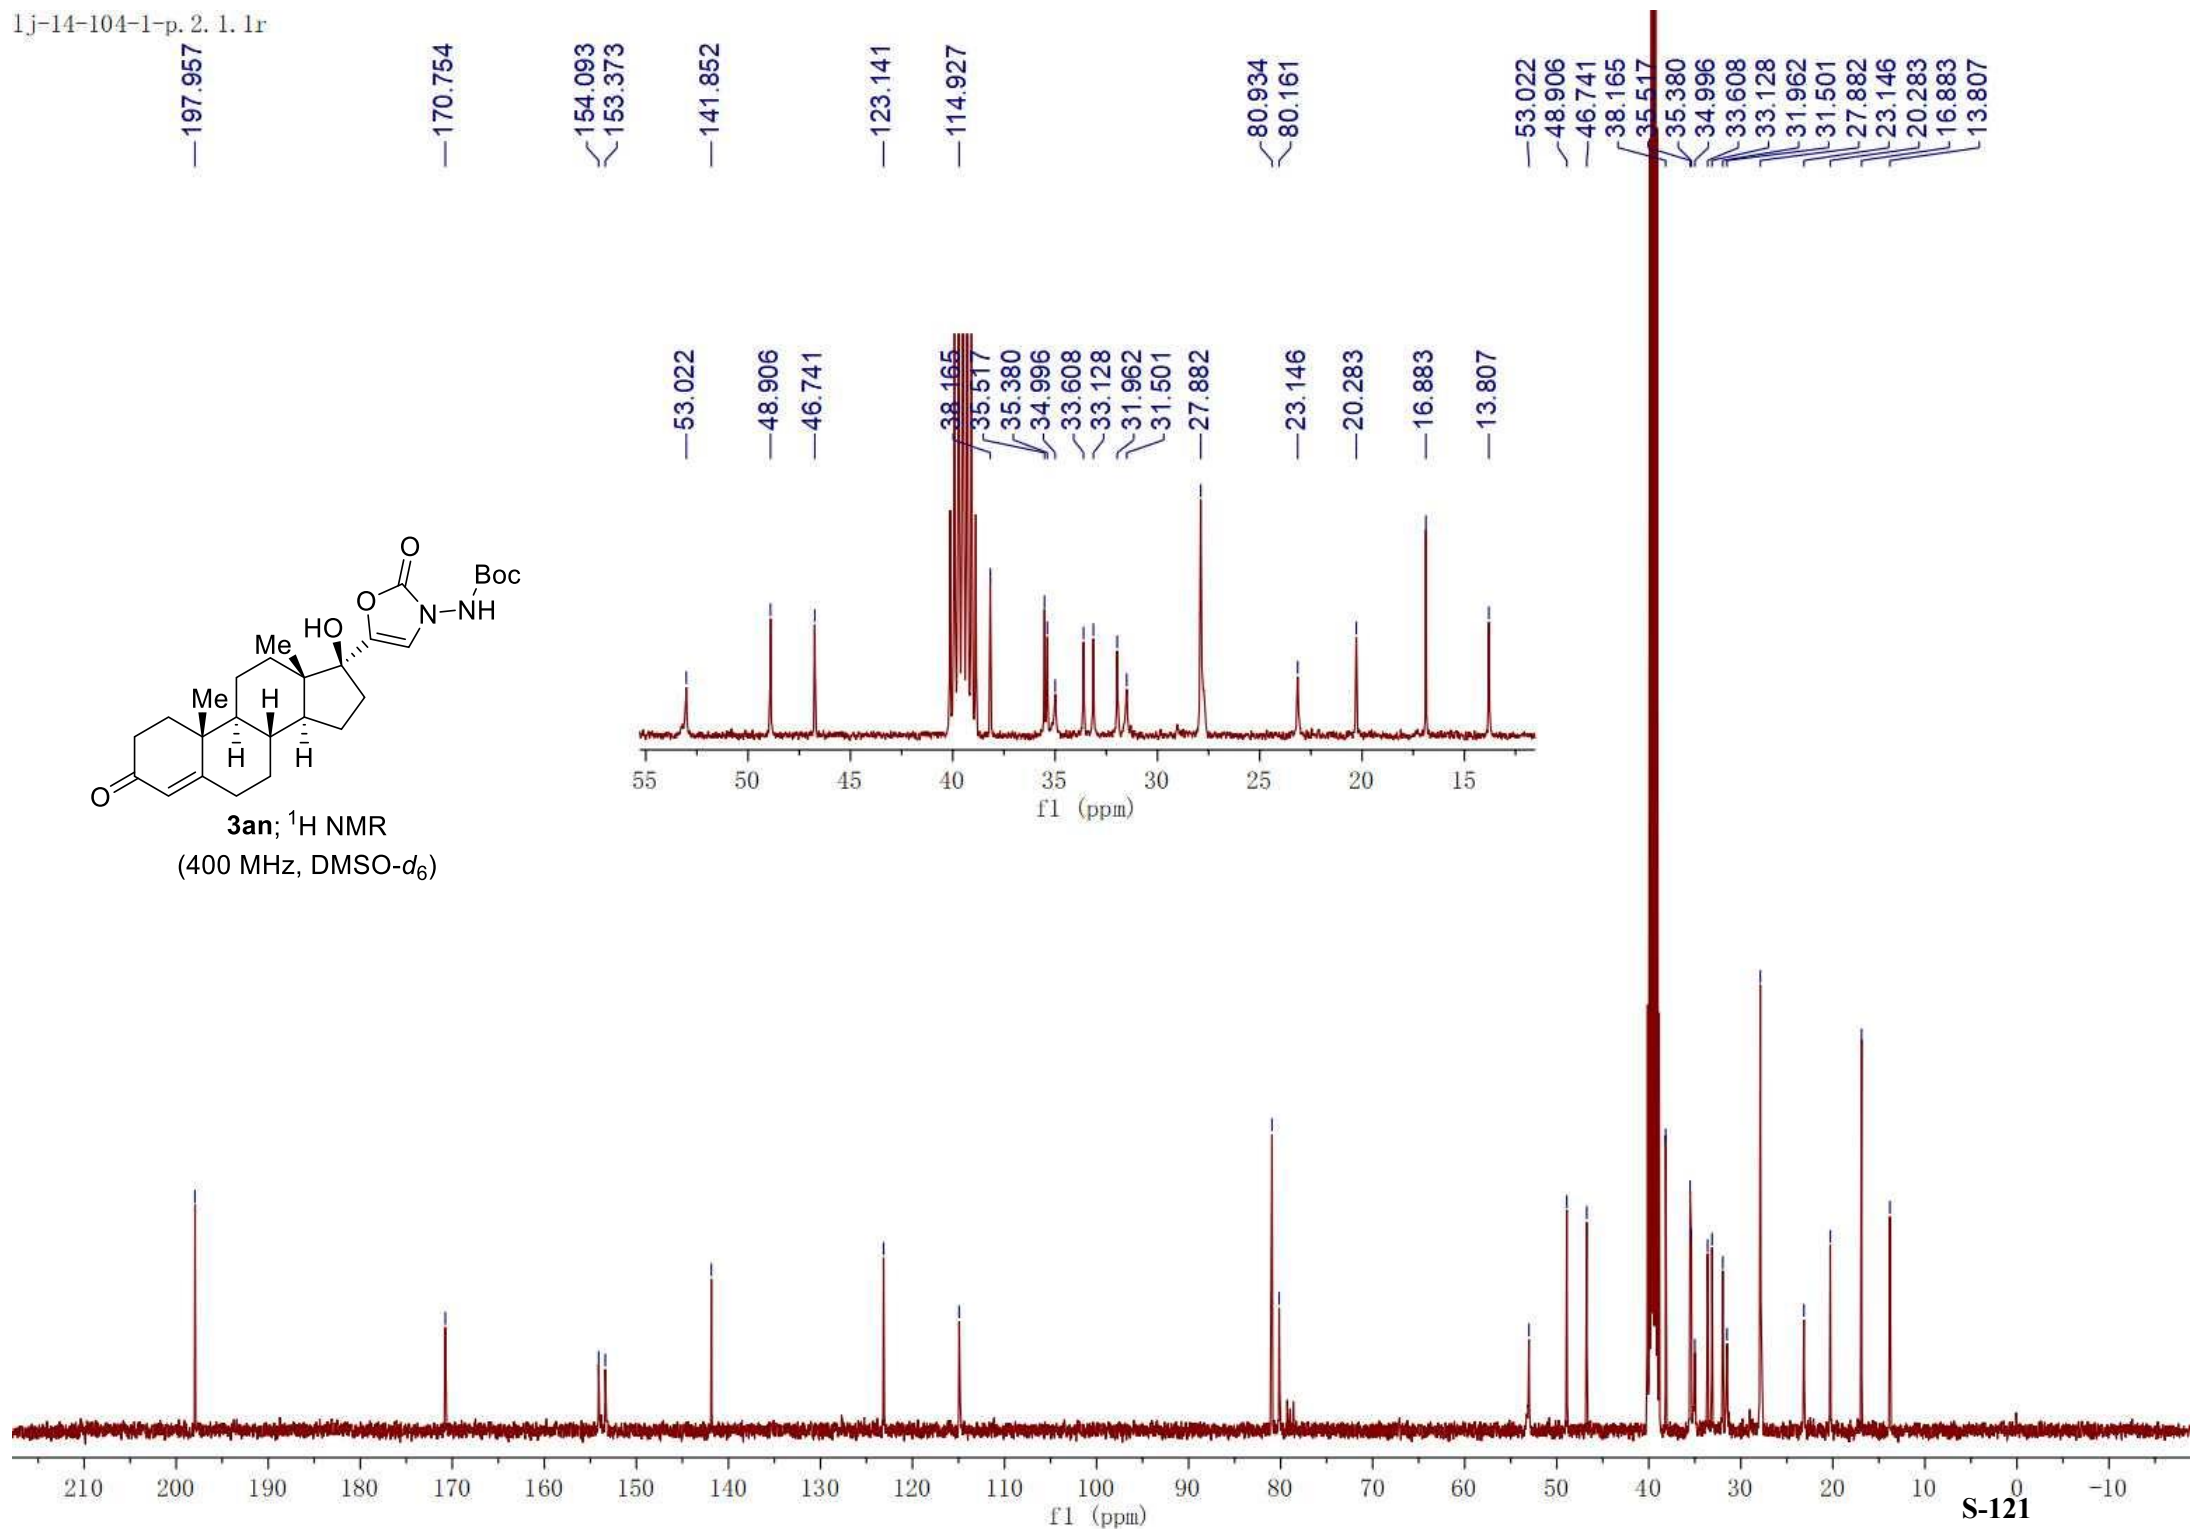

—10.268

—9.864

—7.832

—7.462

—7.441

—7.278

—7.257

—7.192

—7.173

—7.101

—7.081

—5.125

—5.092

—5.087

—5.055

—3.847

—3.829

—3.811

—3.793

—2.411

—2.394

—1.842

—1.825

—1.809

—1.792

—1.775

—1.758

—1.741

—1.453

—1.402

—1.385

—1.359

—0.845

—0.829

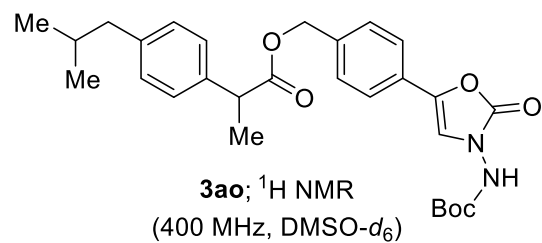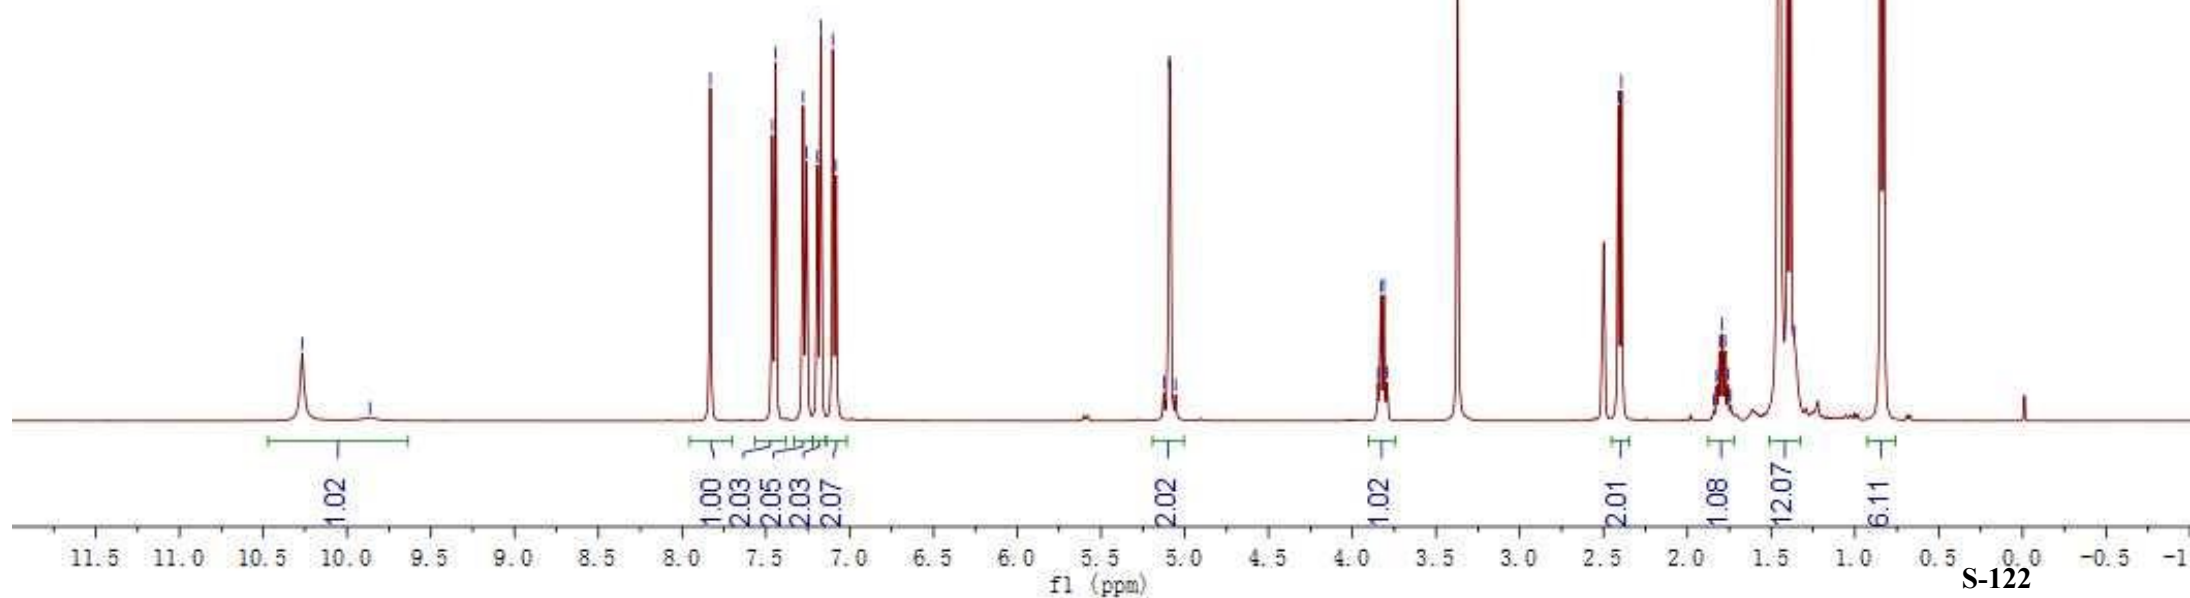

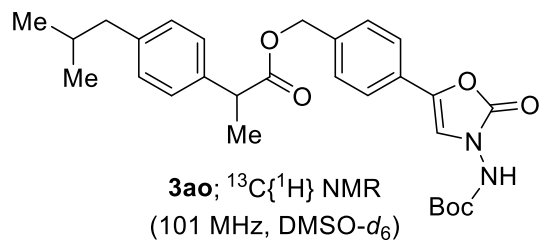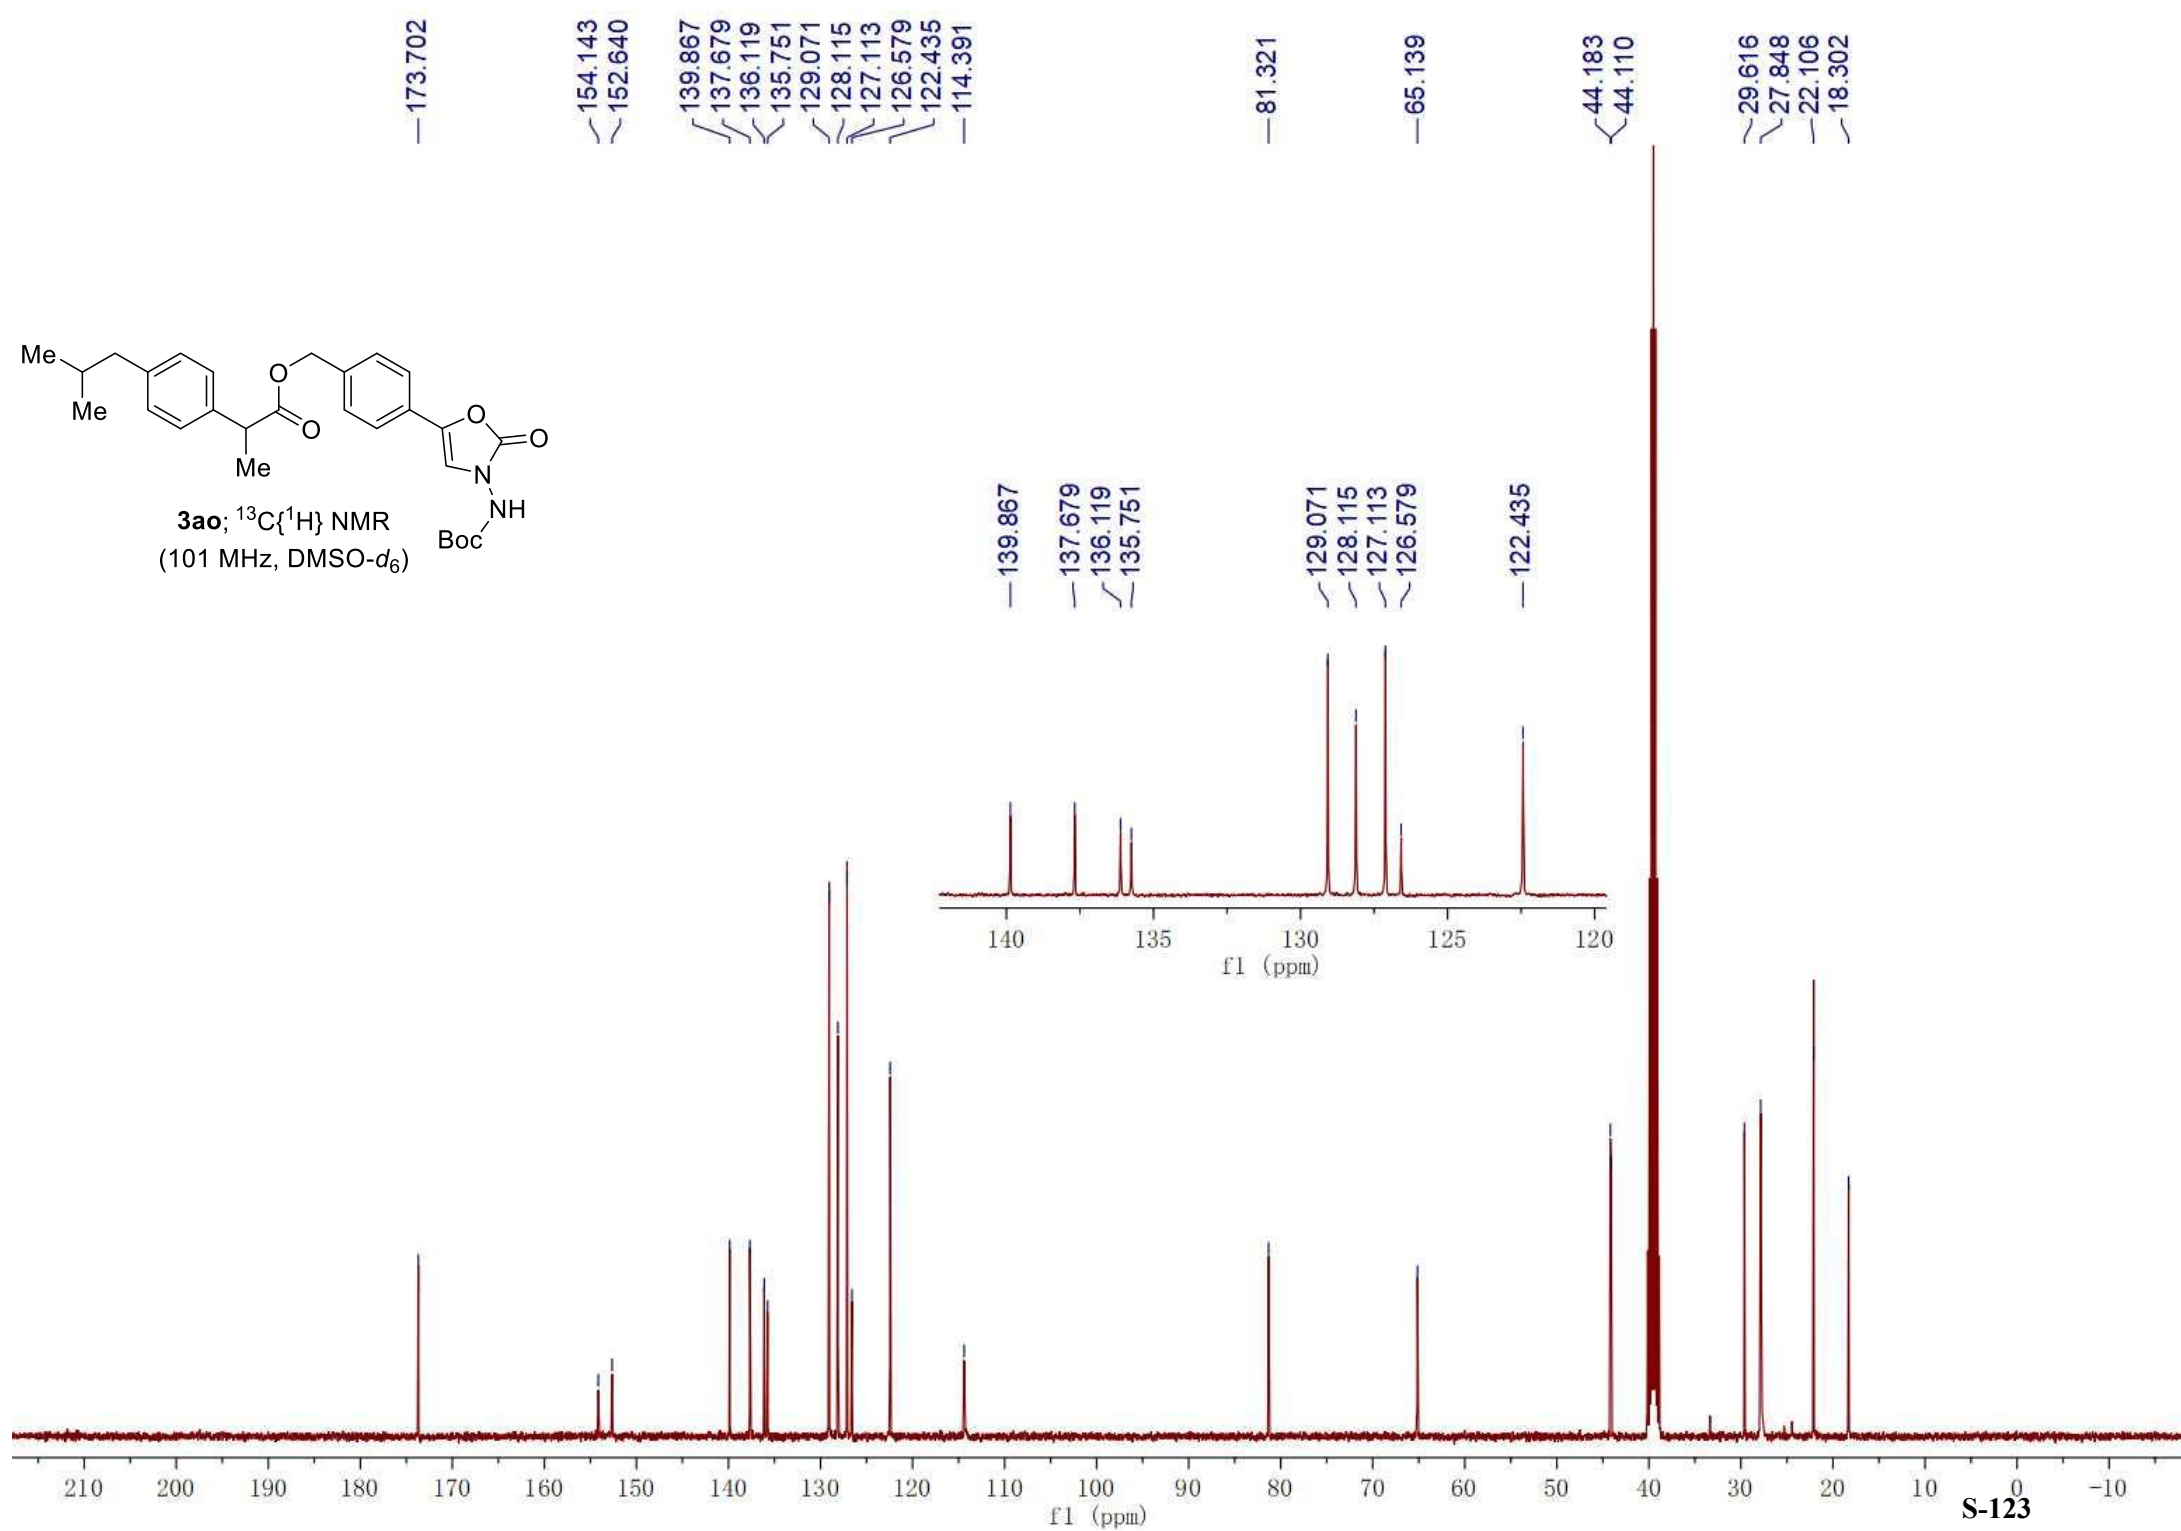



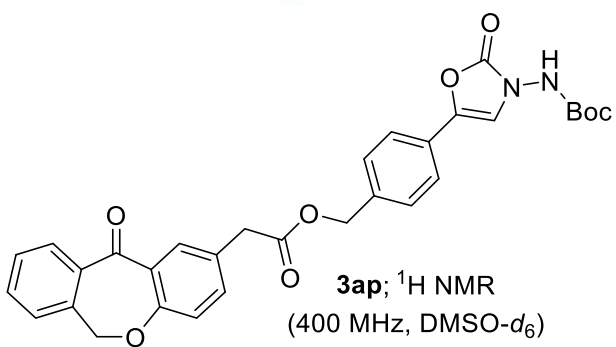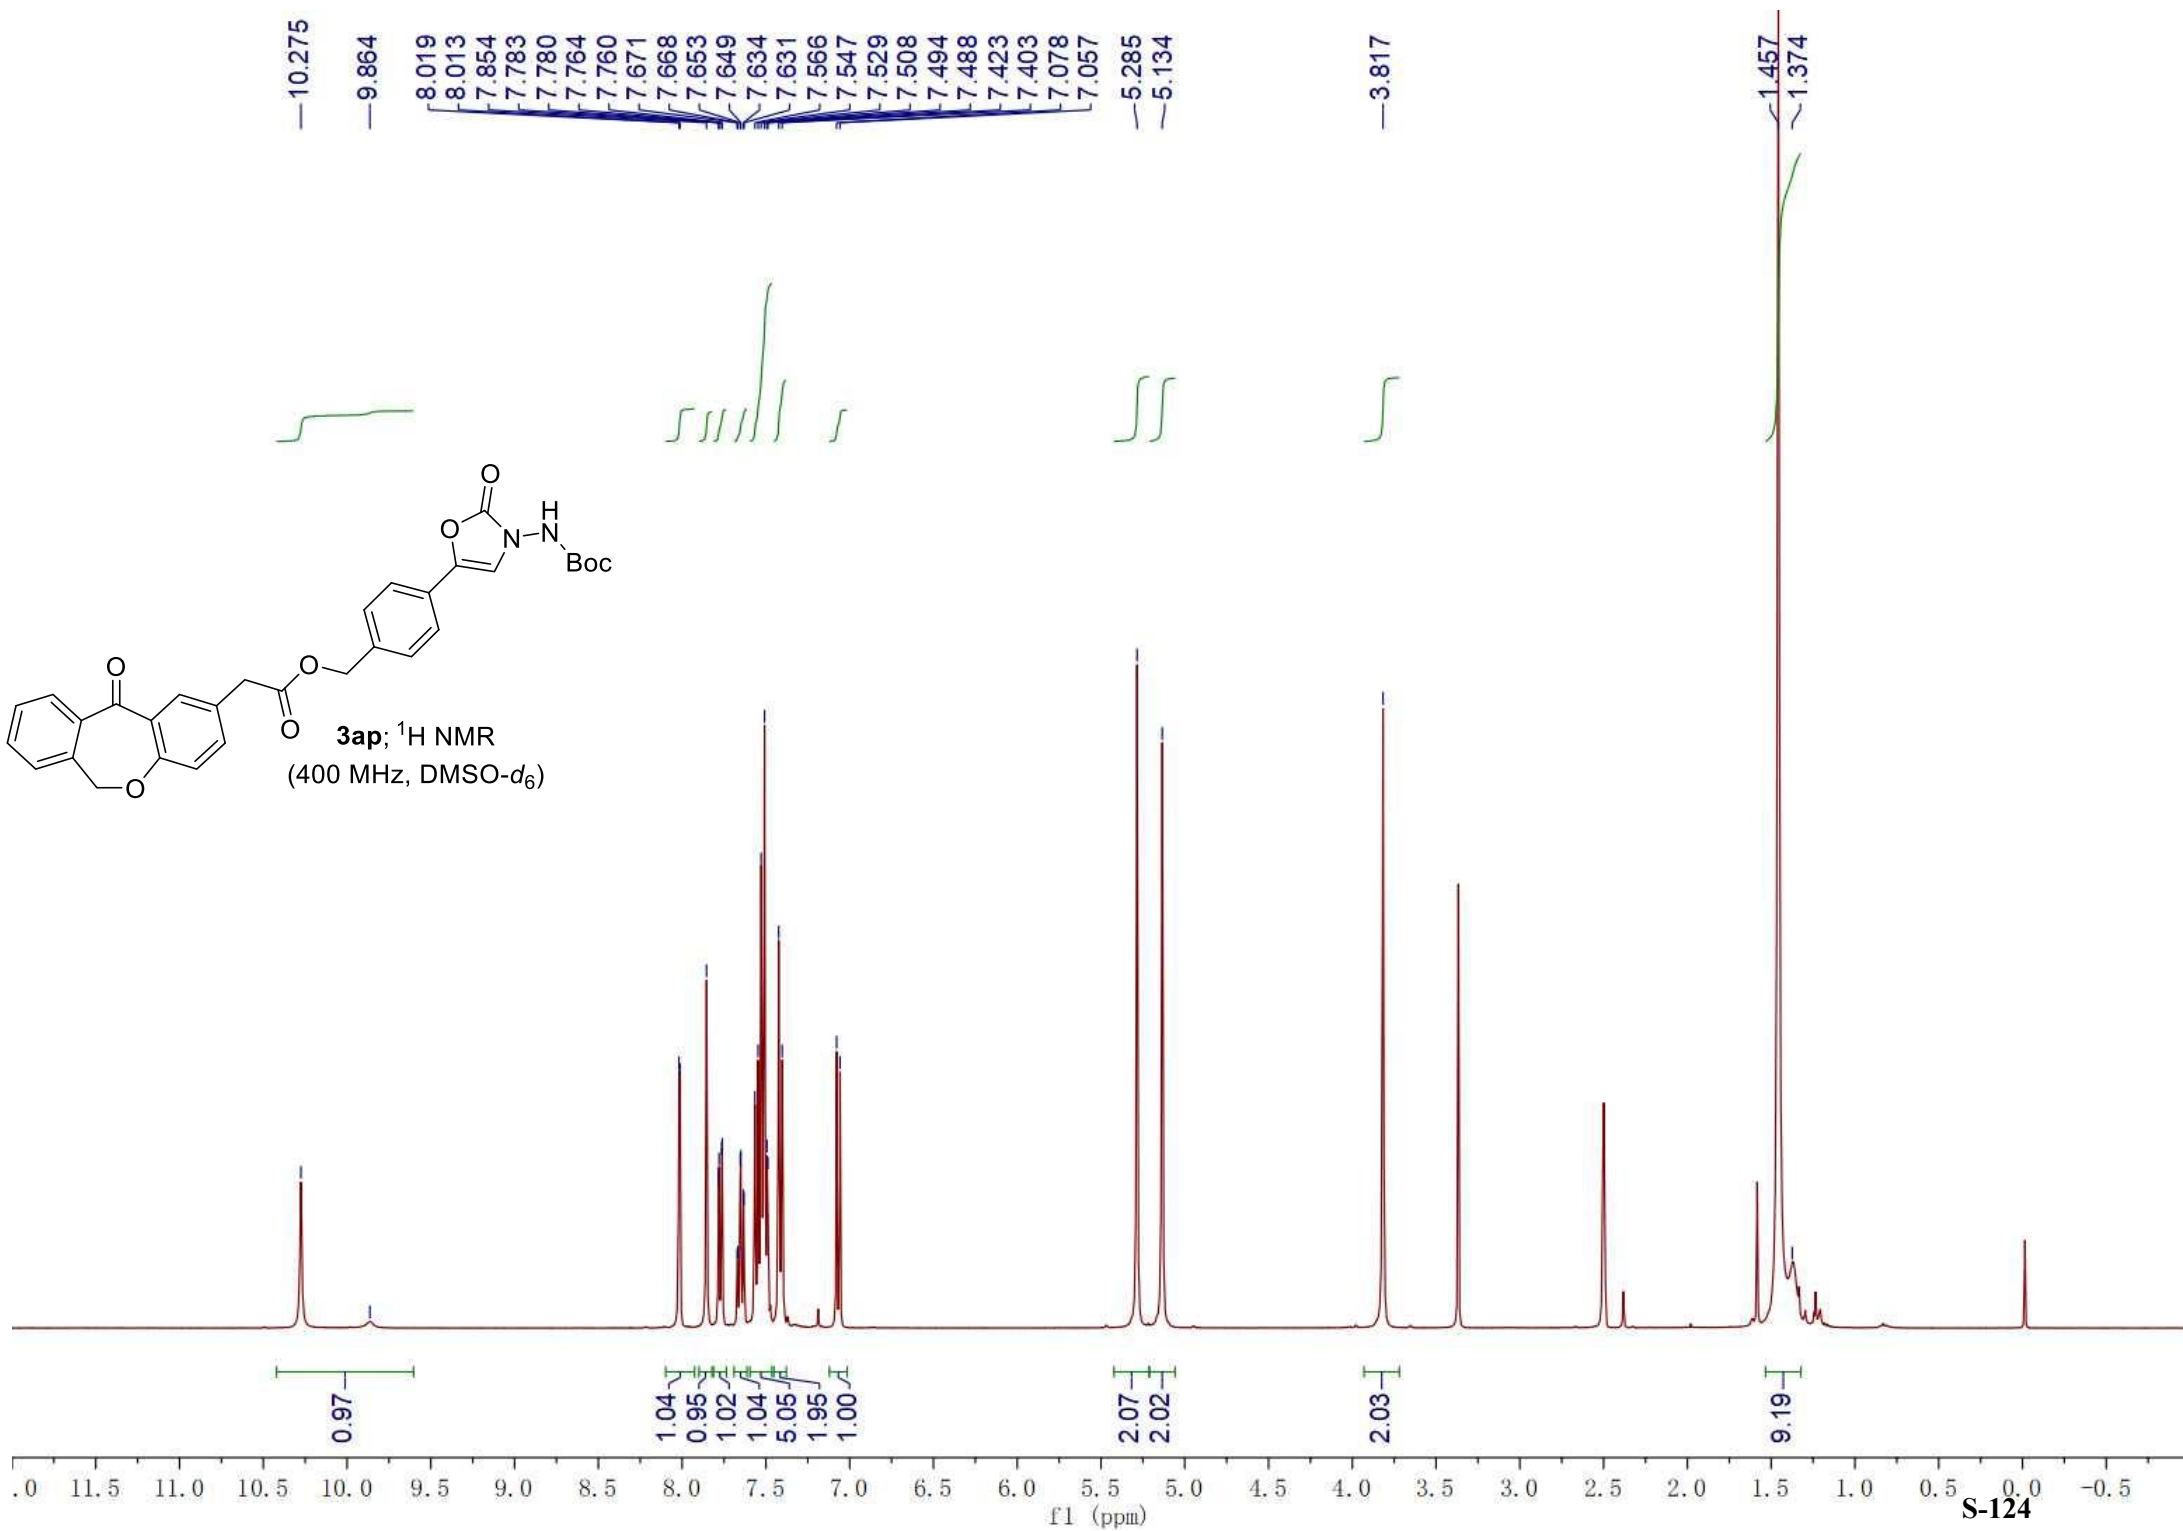



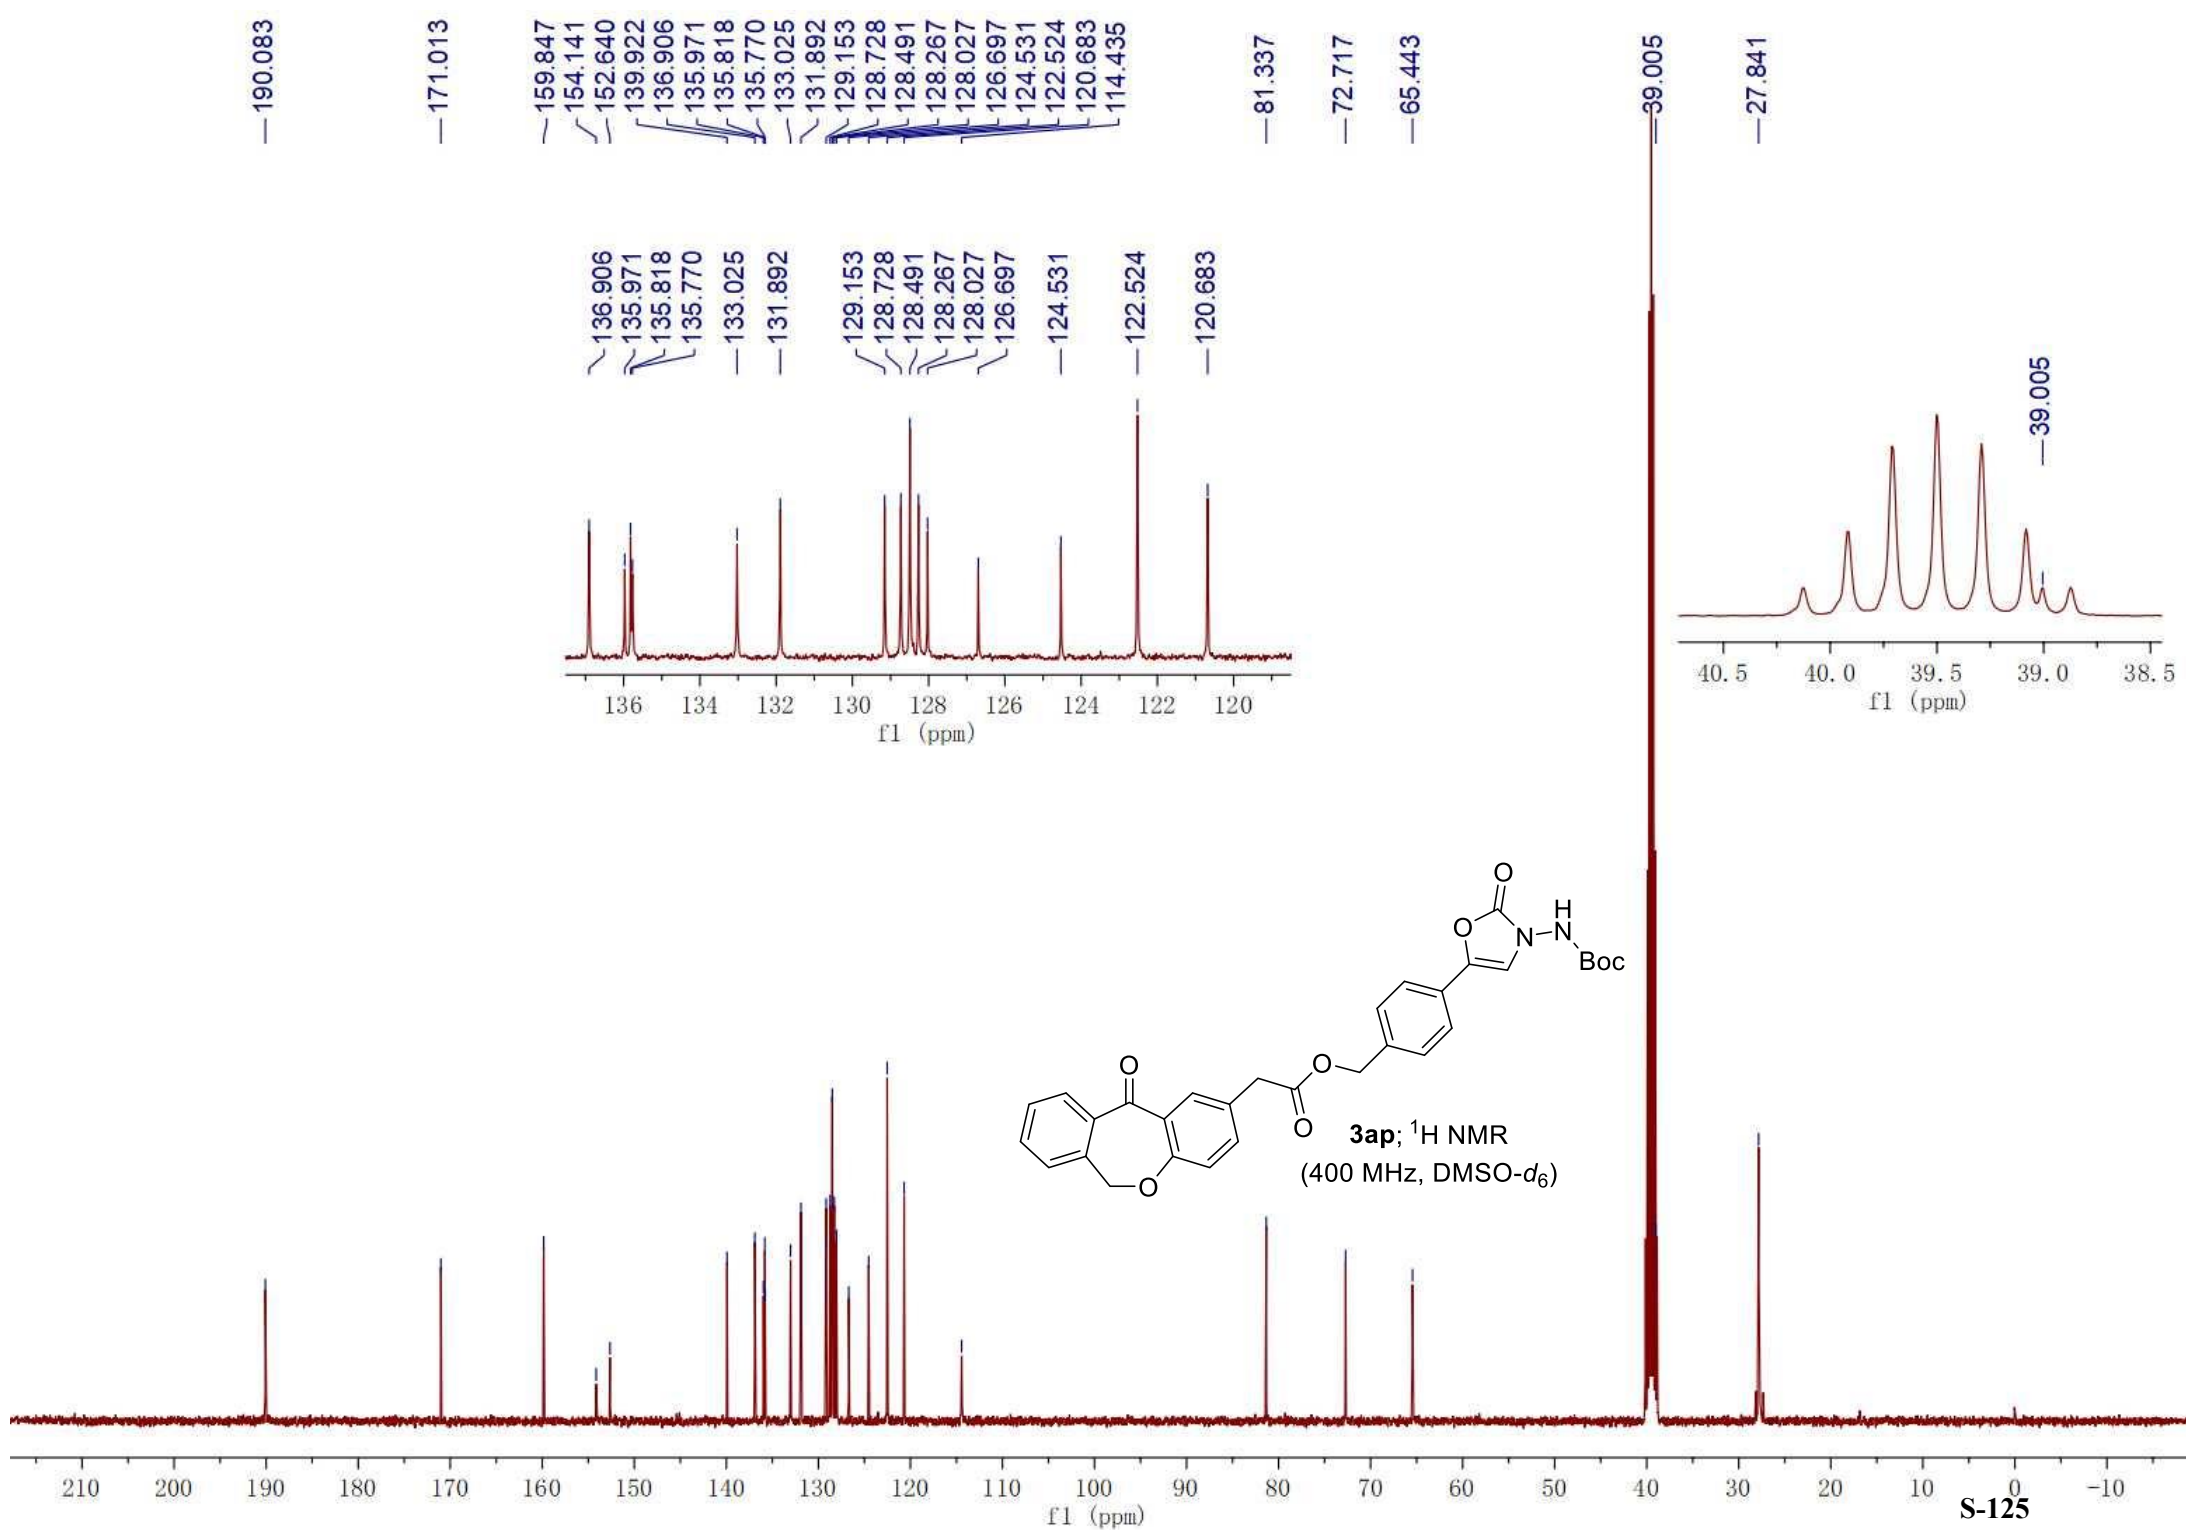

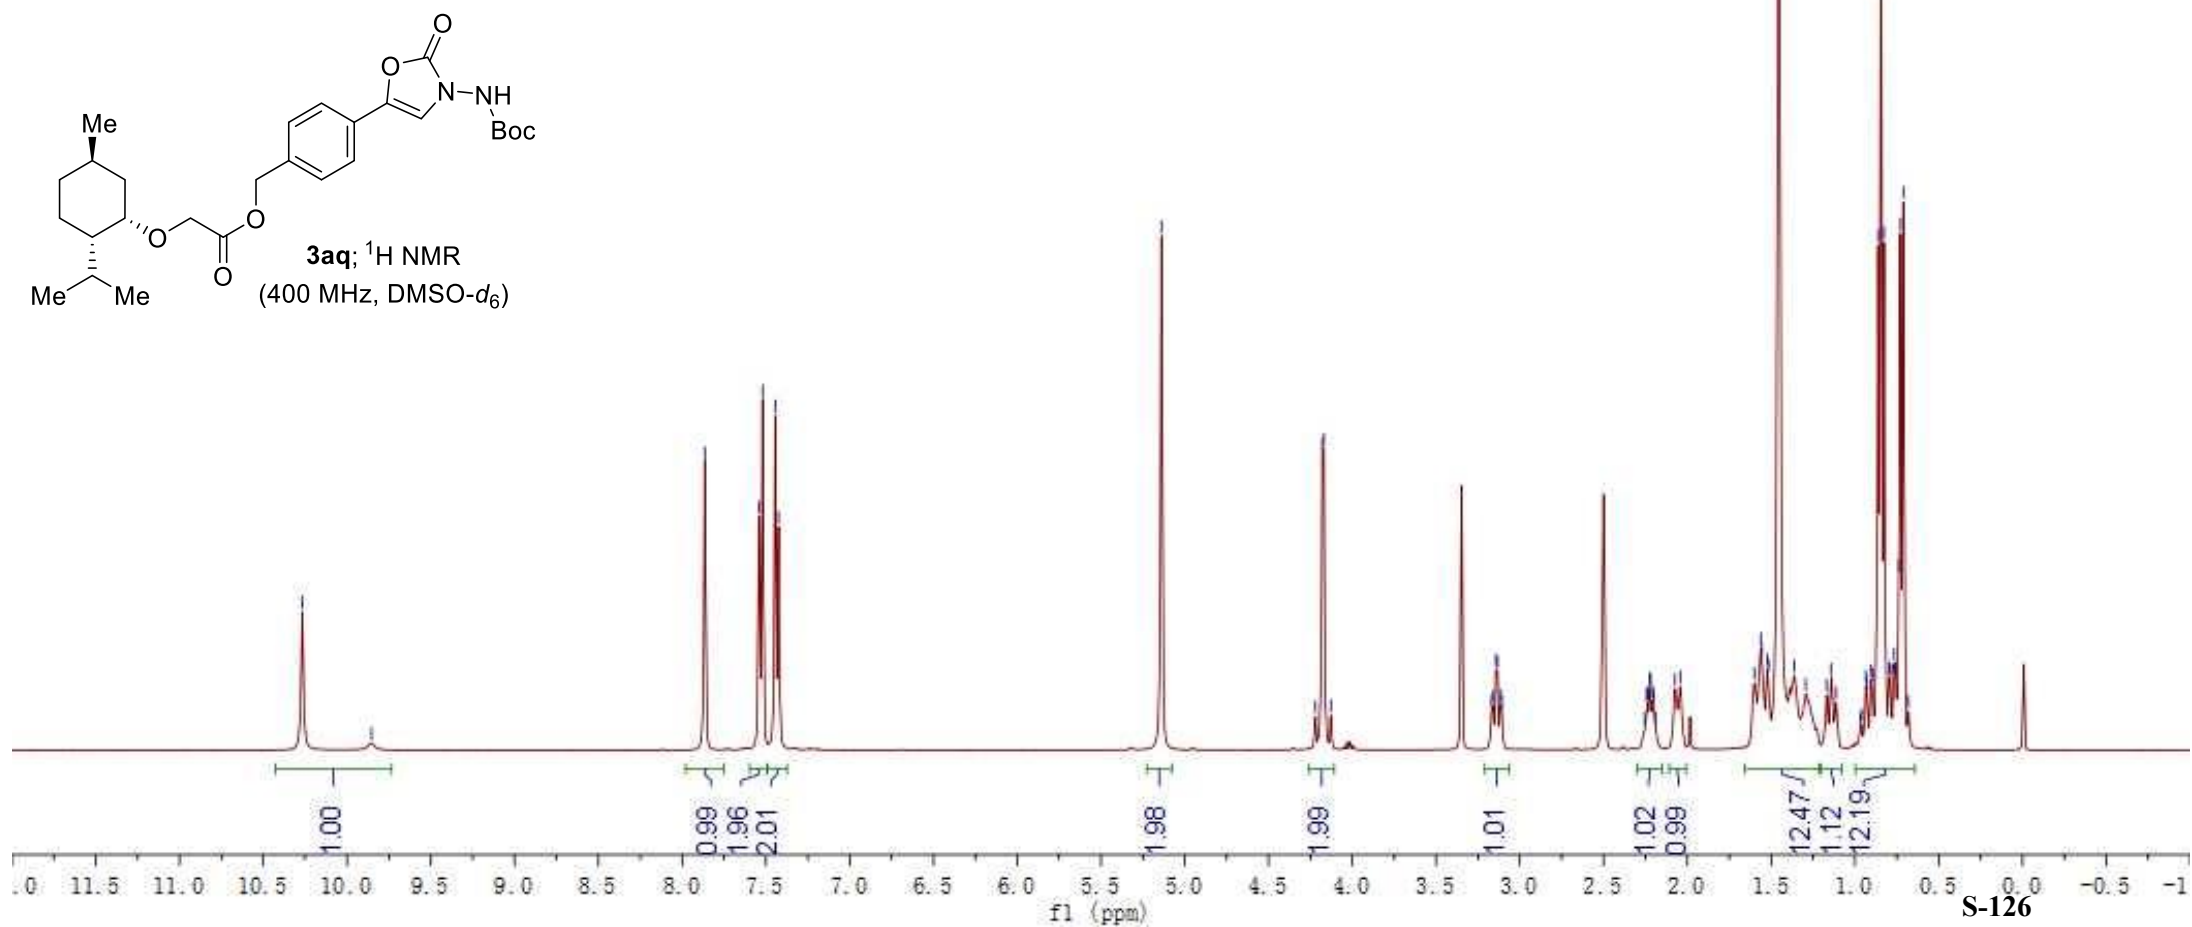

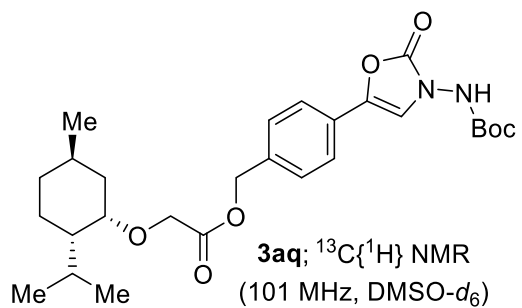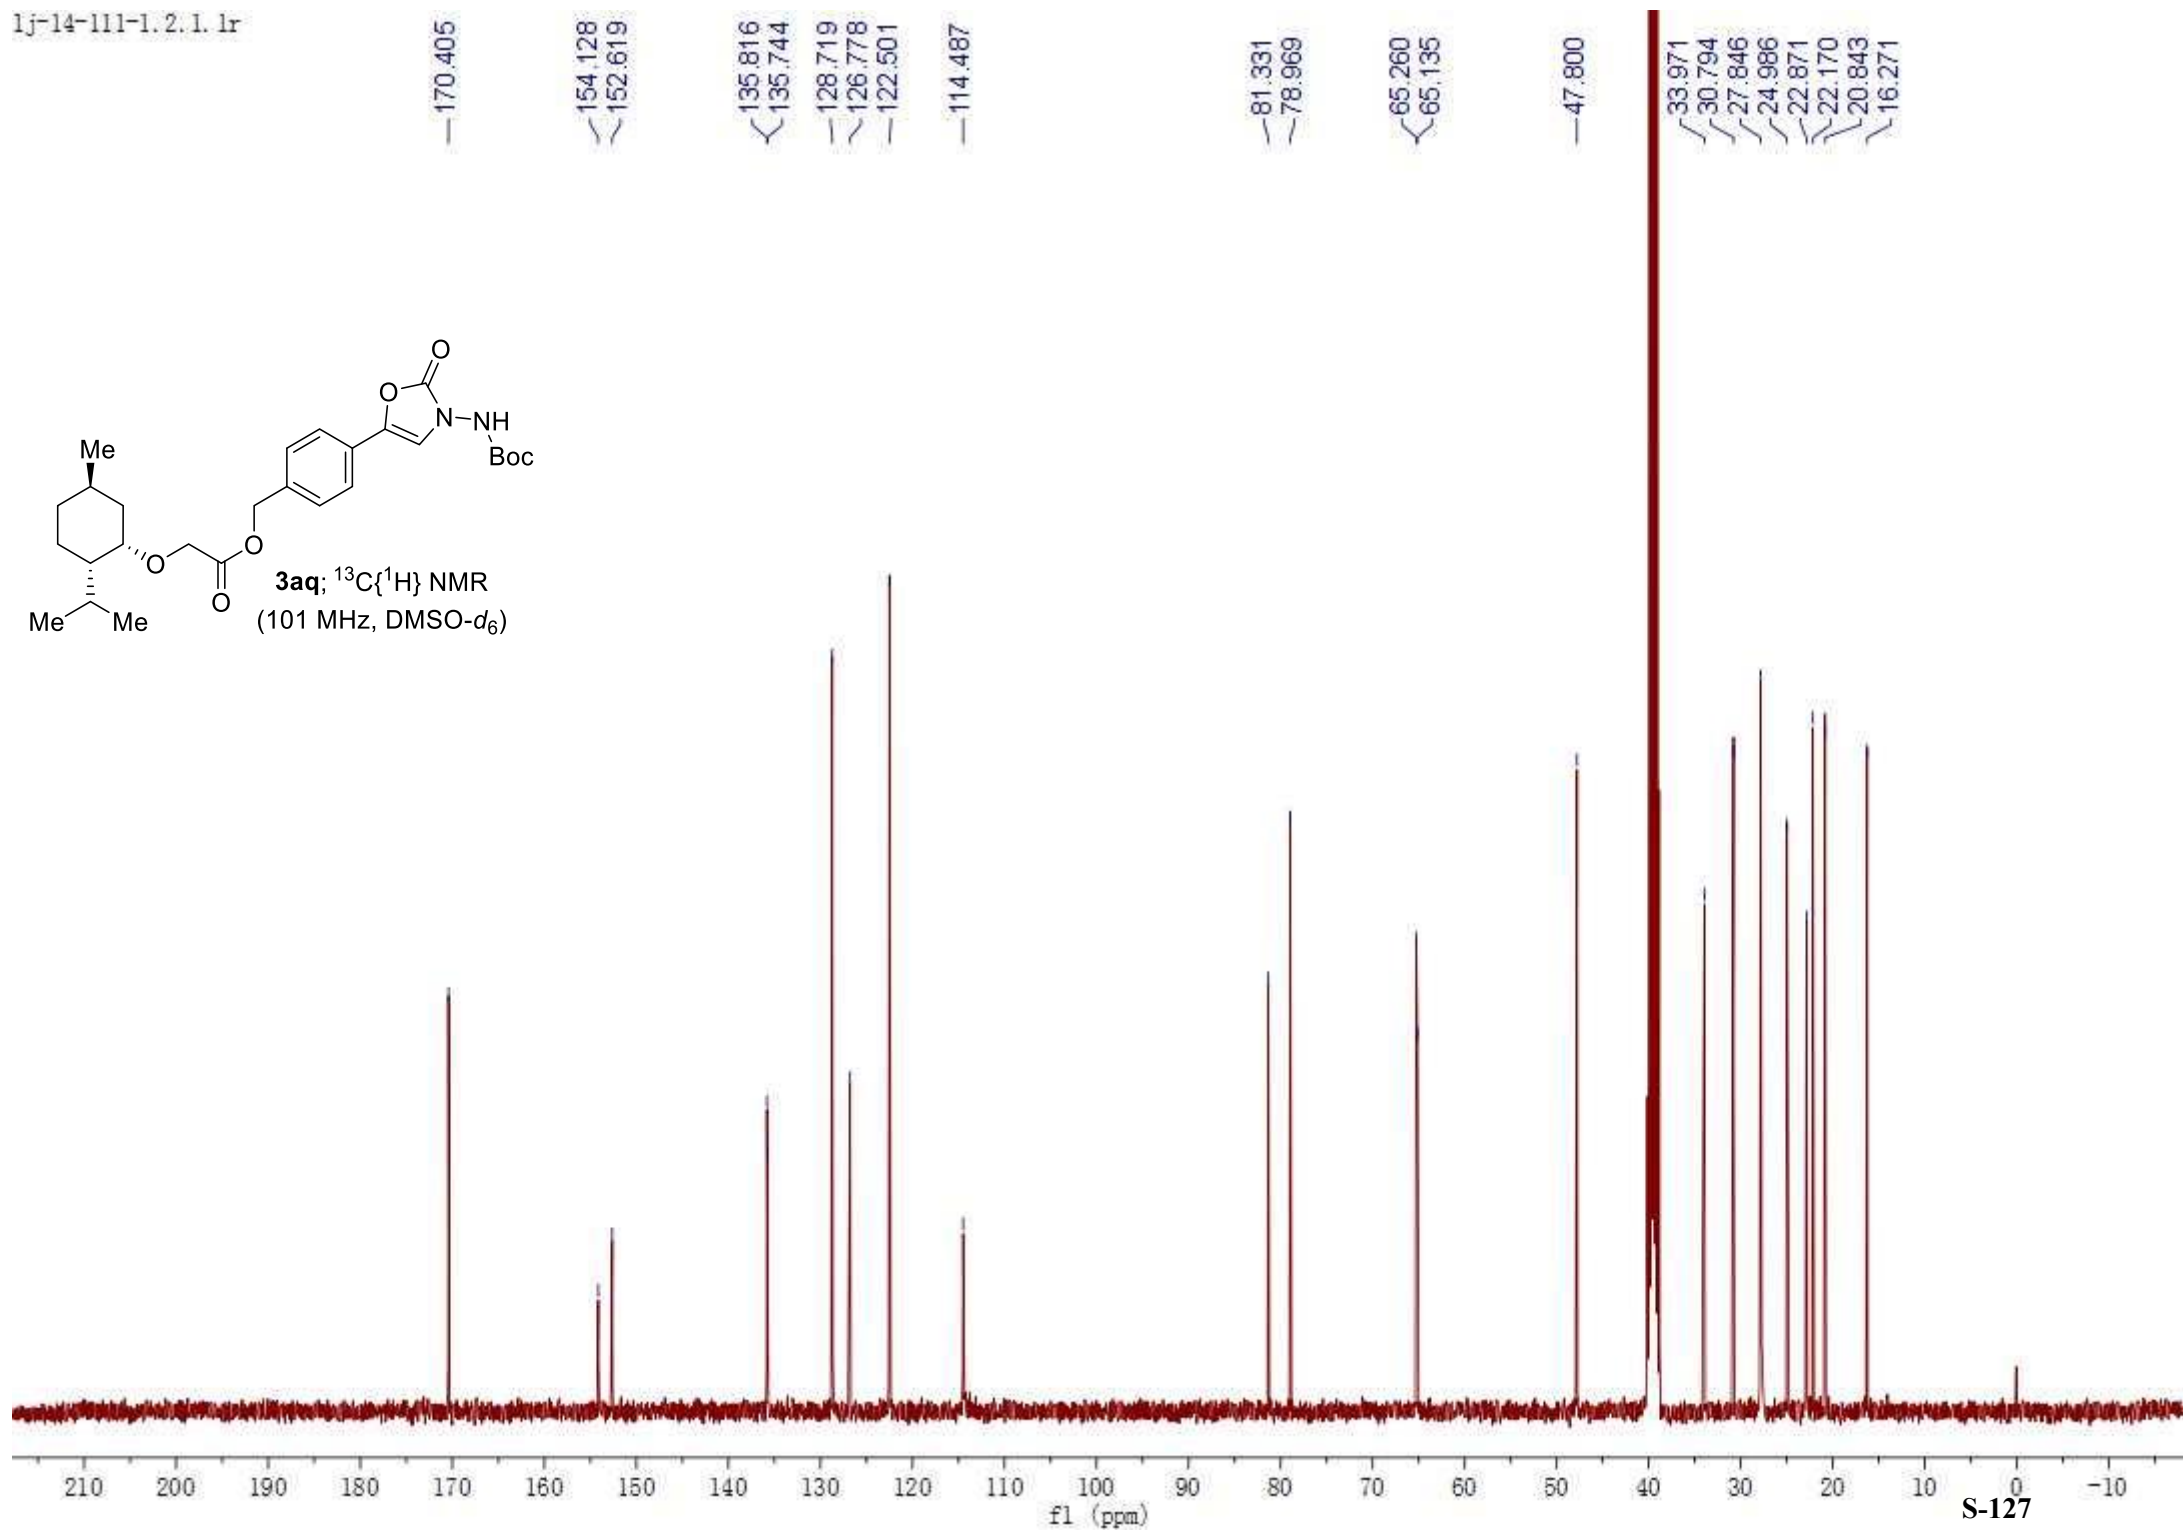

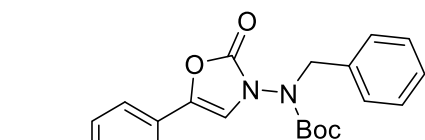

**5**;  $^1\text{H}$  NMR  
(400 MHz,  $\text{DMSO}-d_6$ )

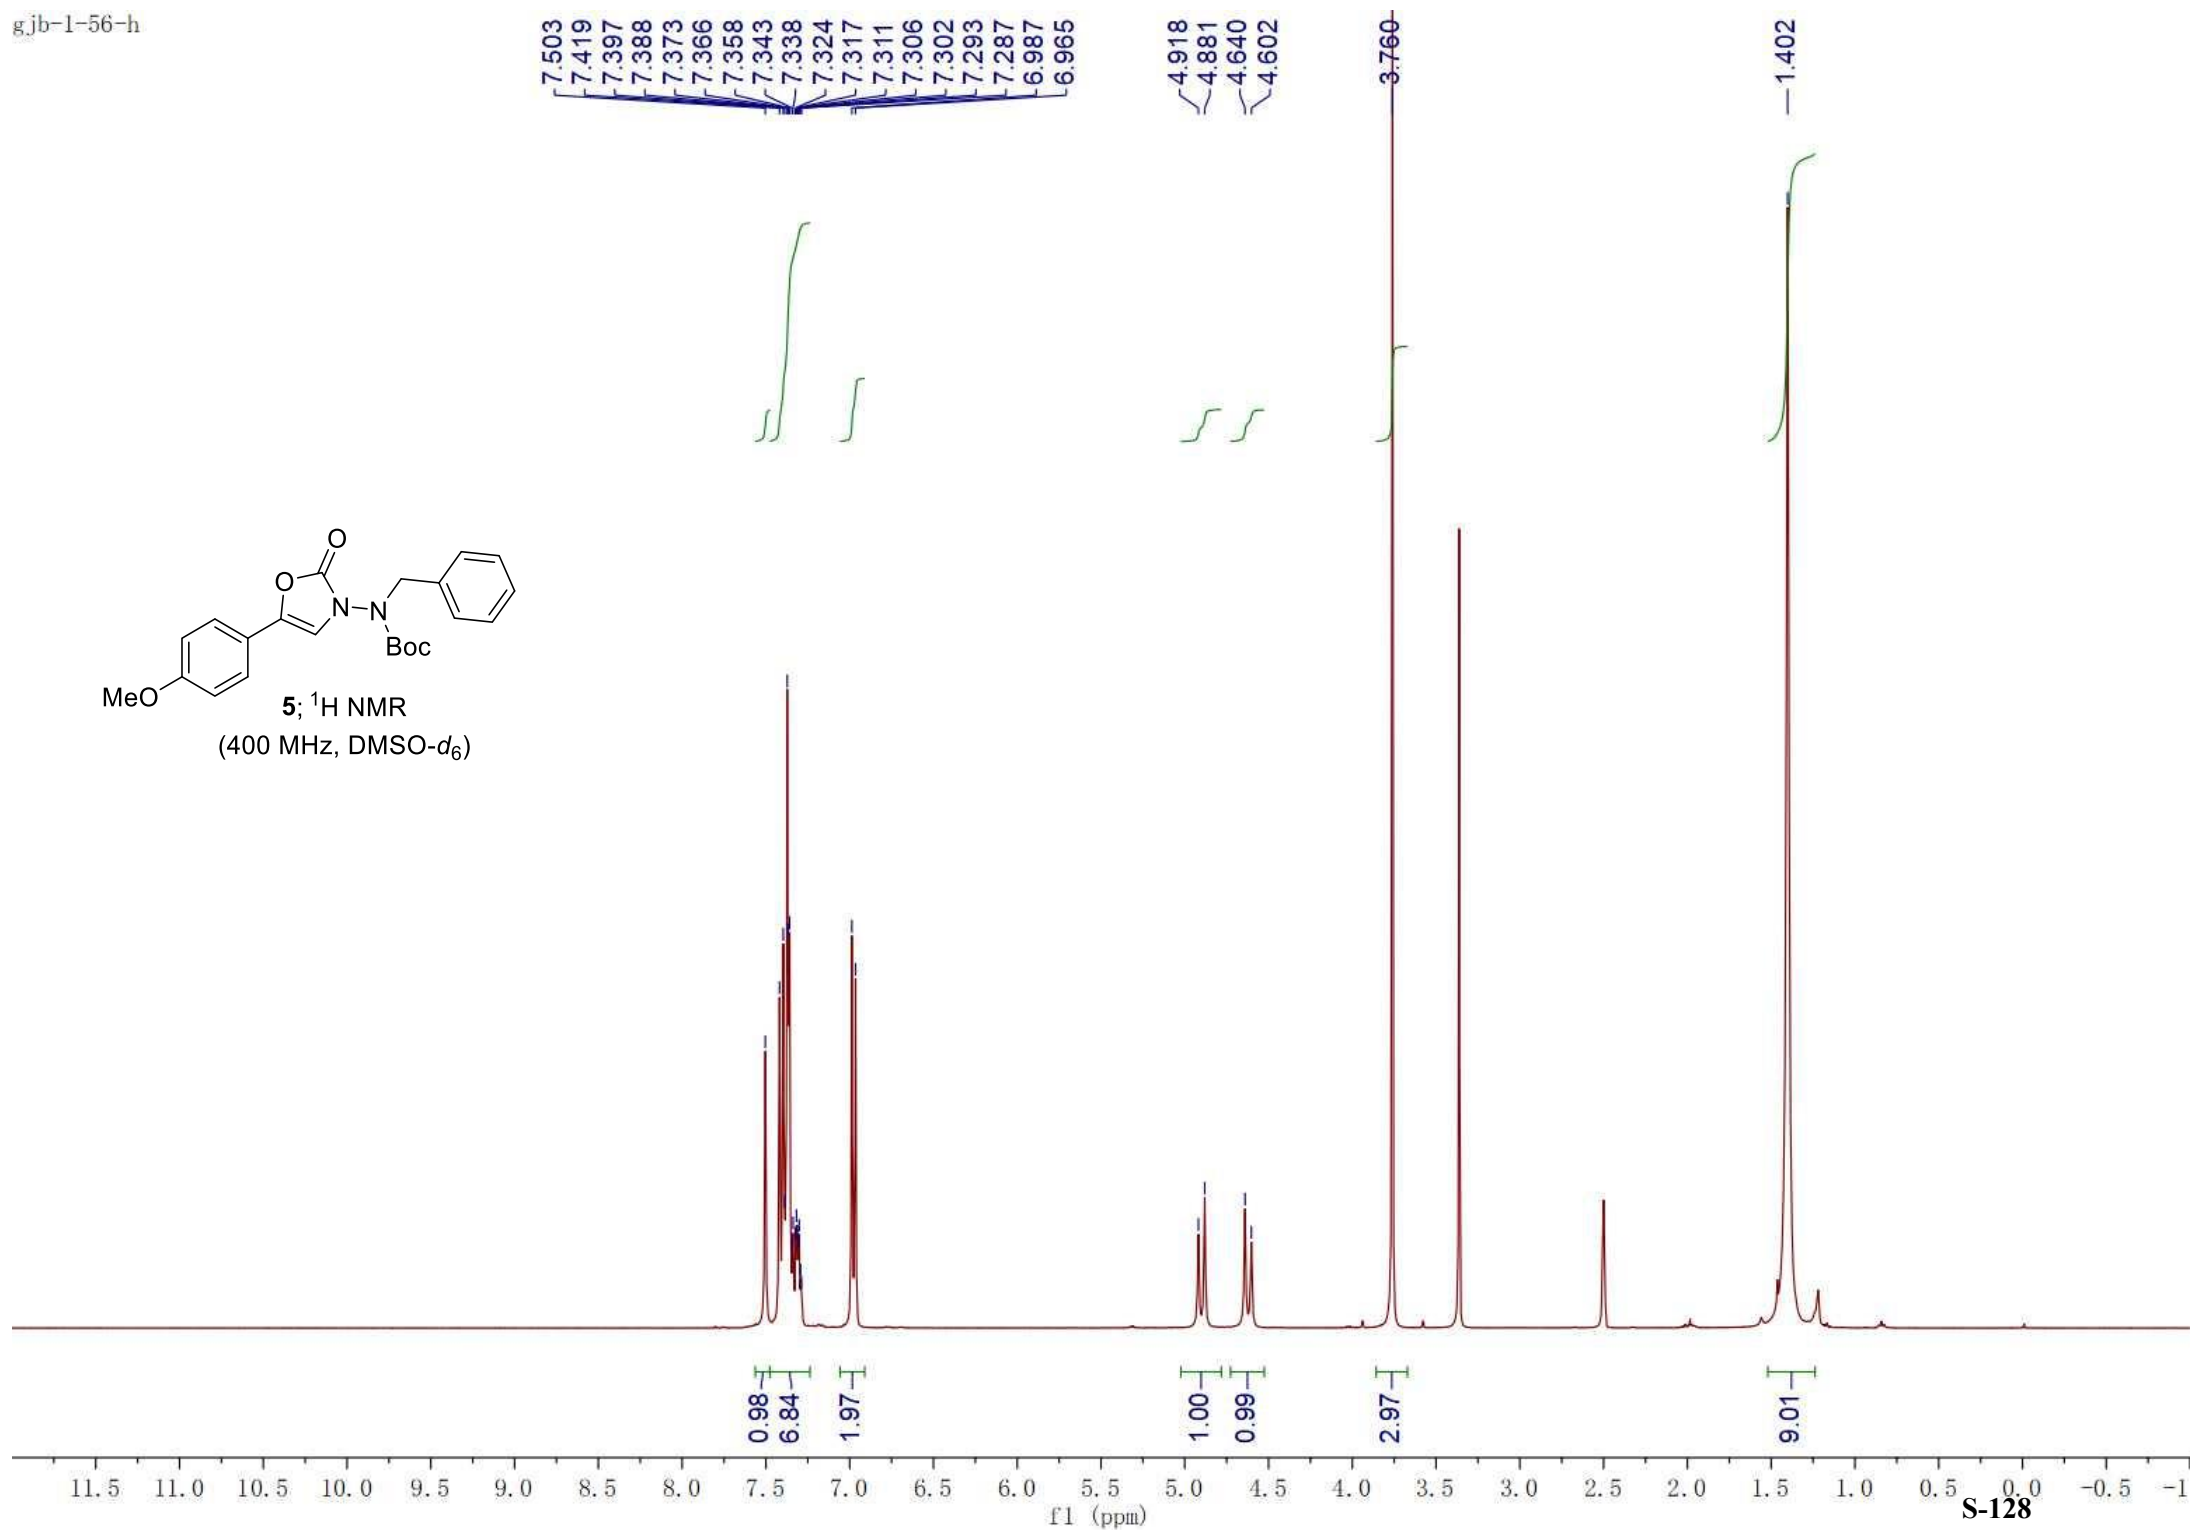

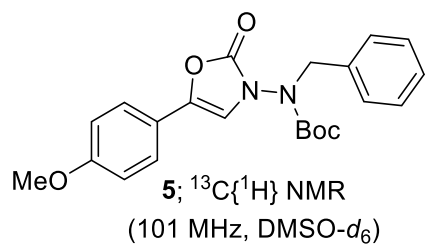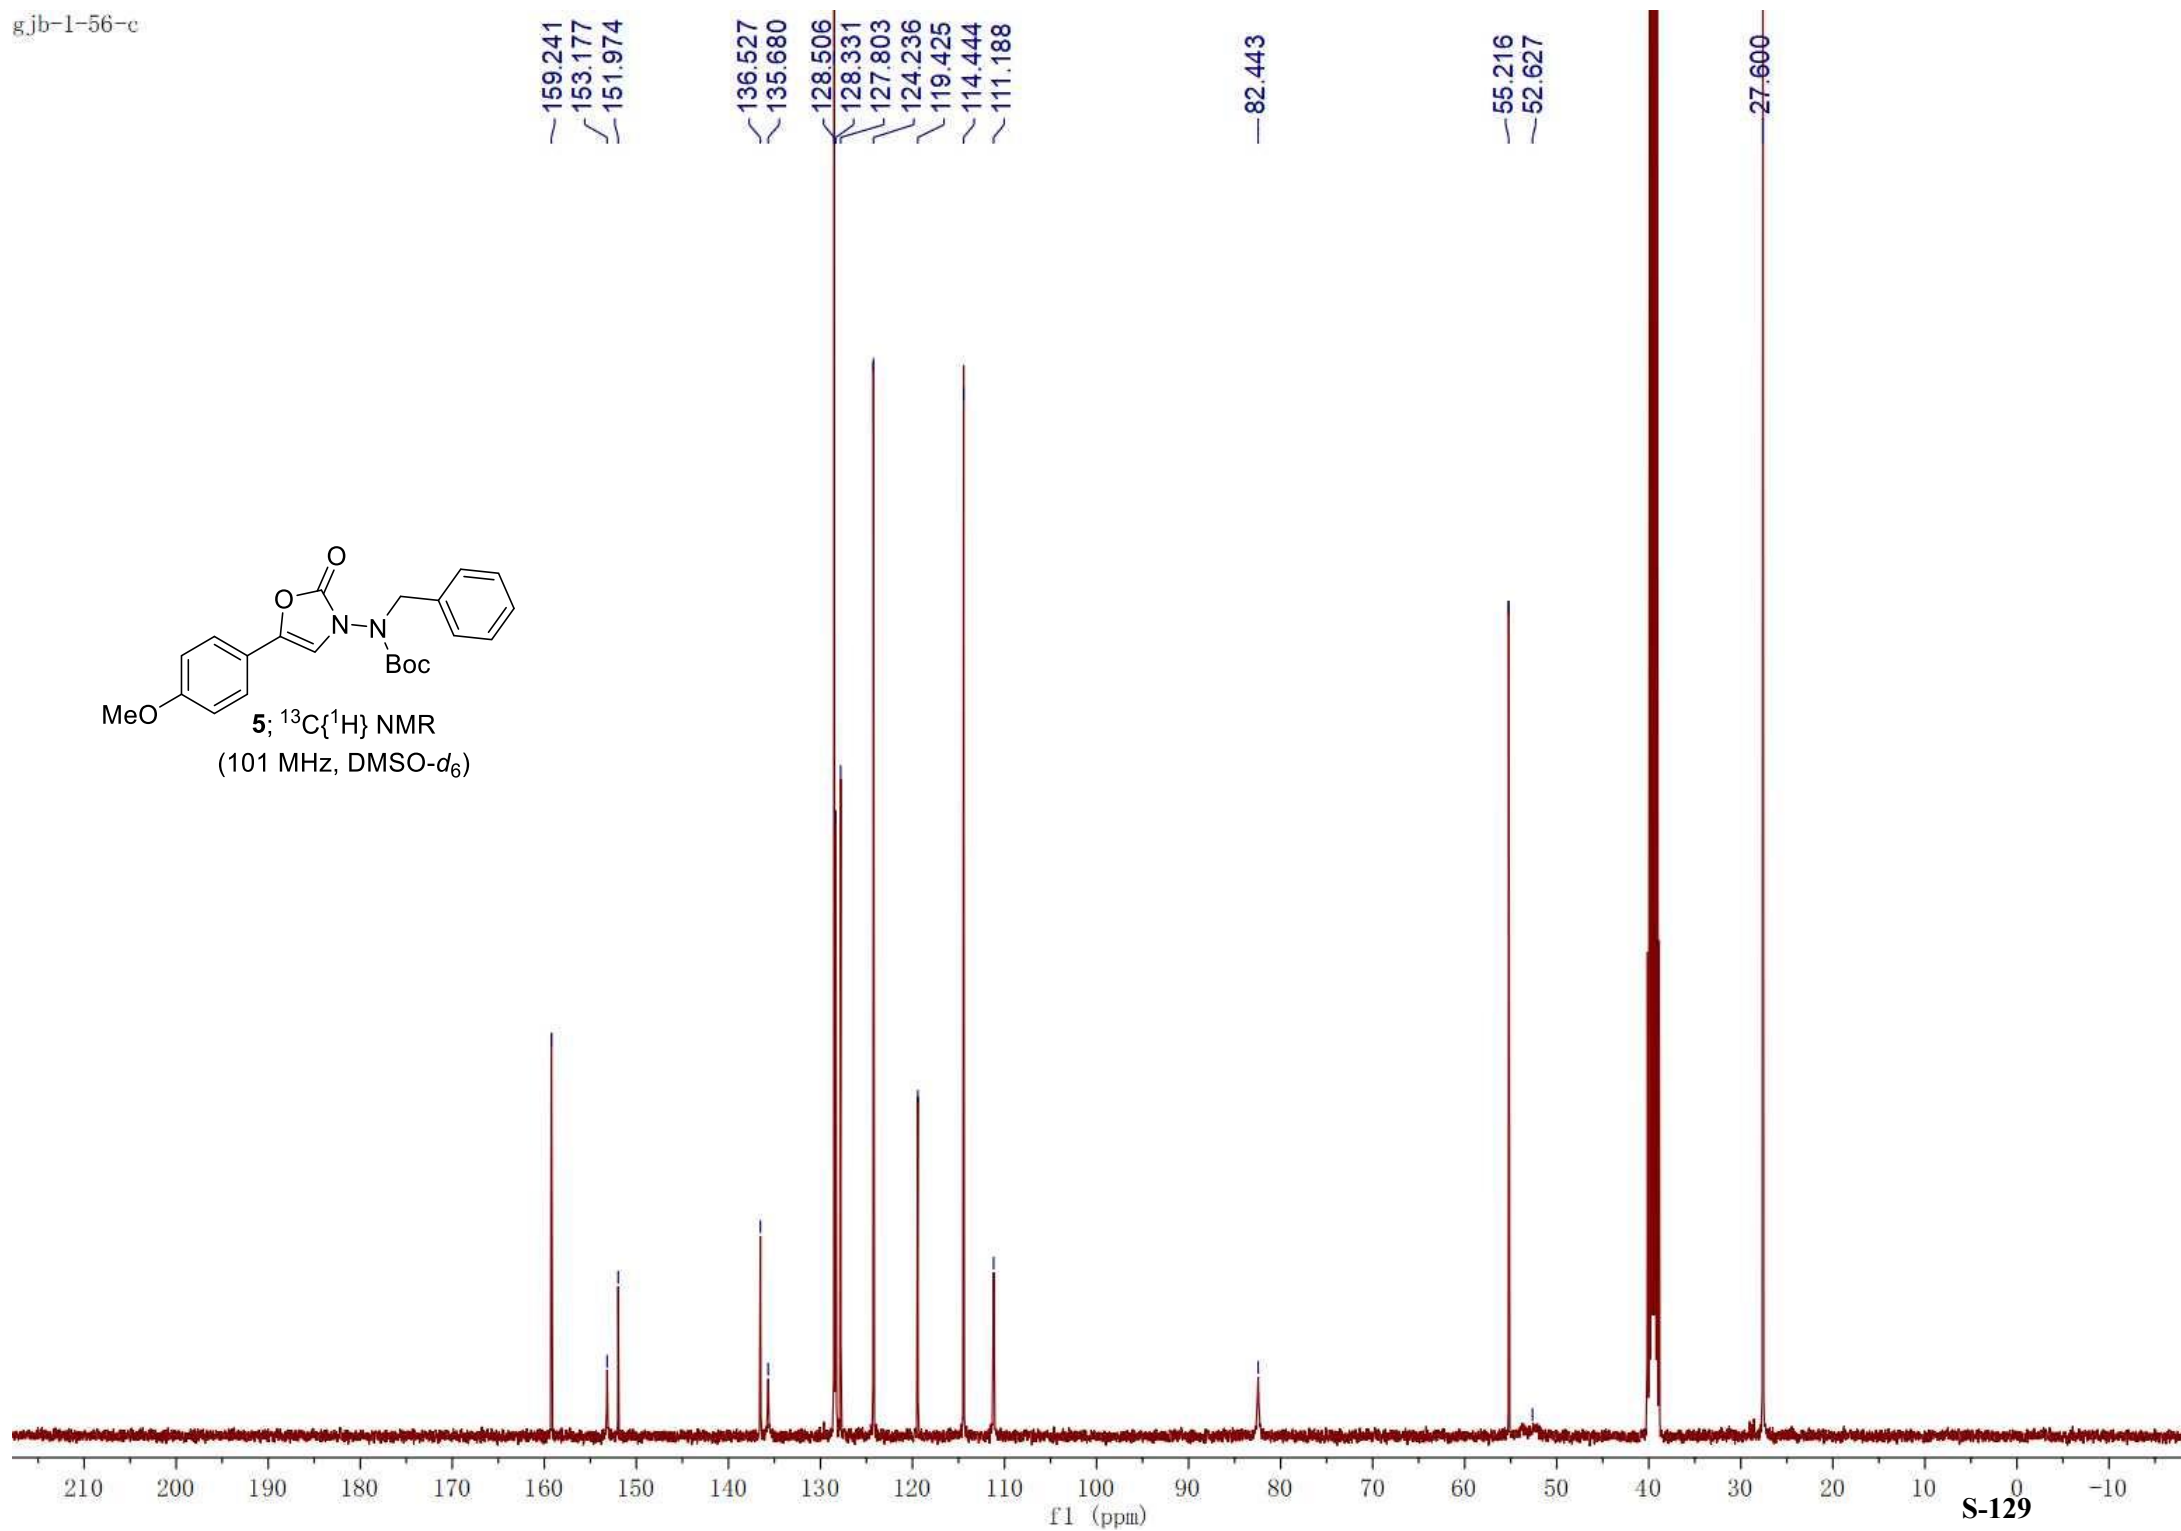

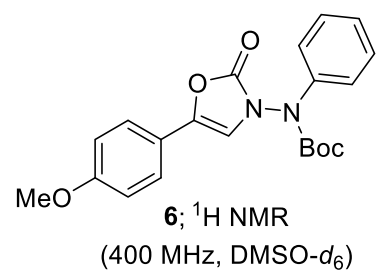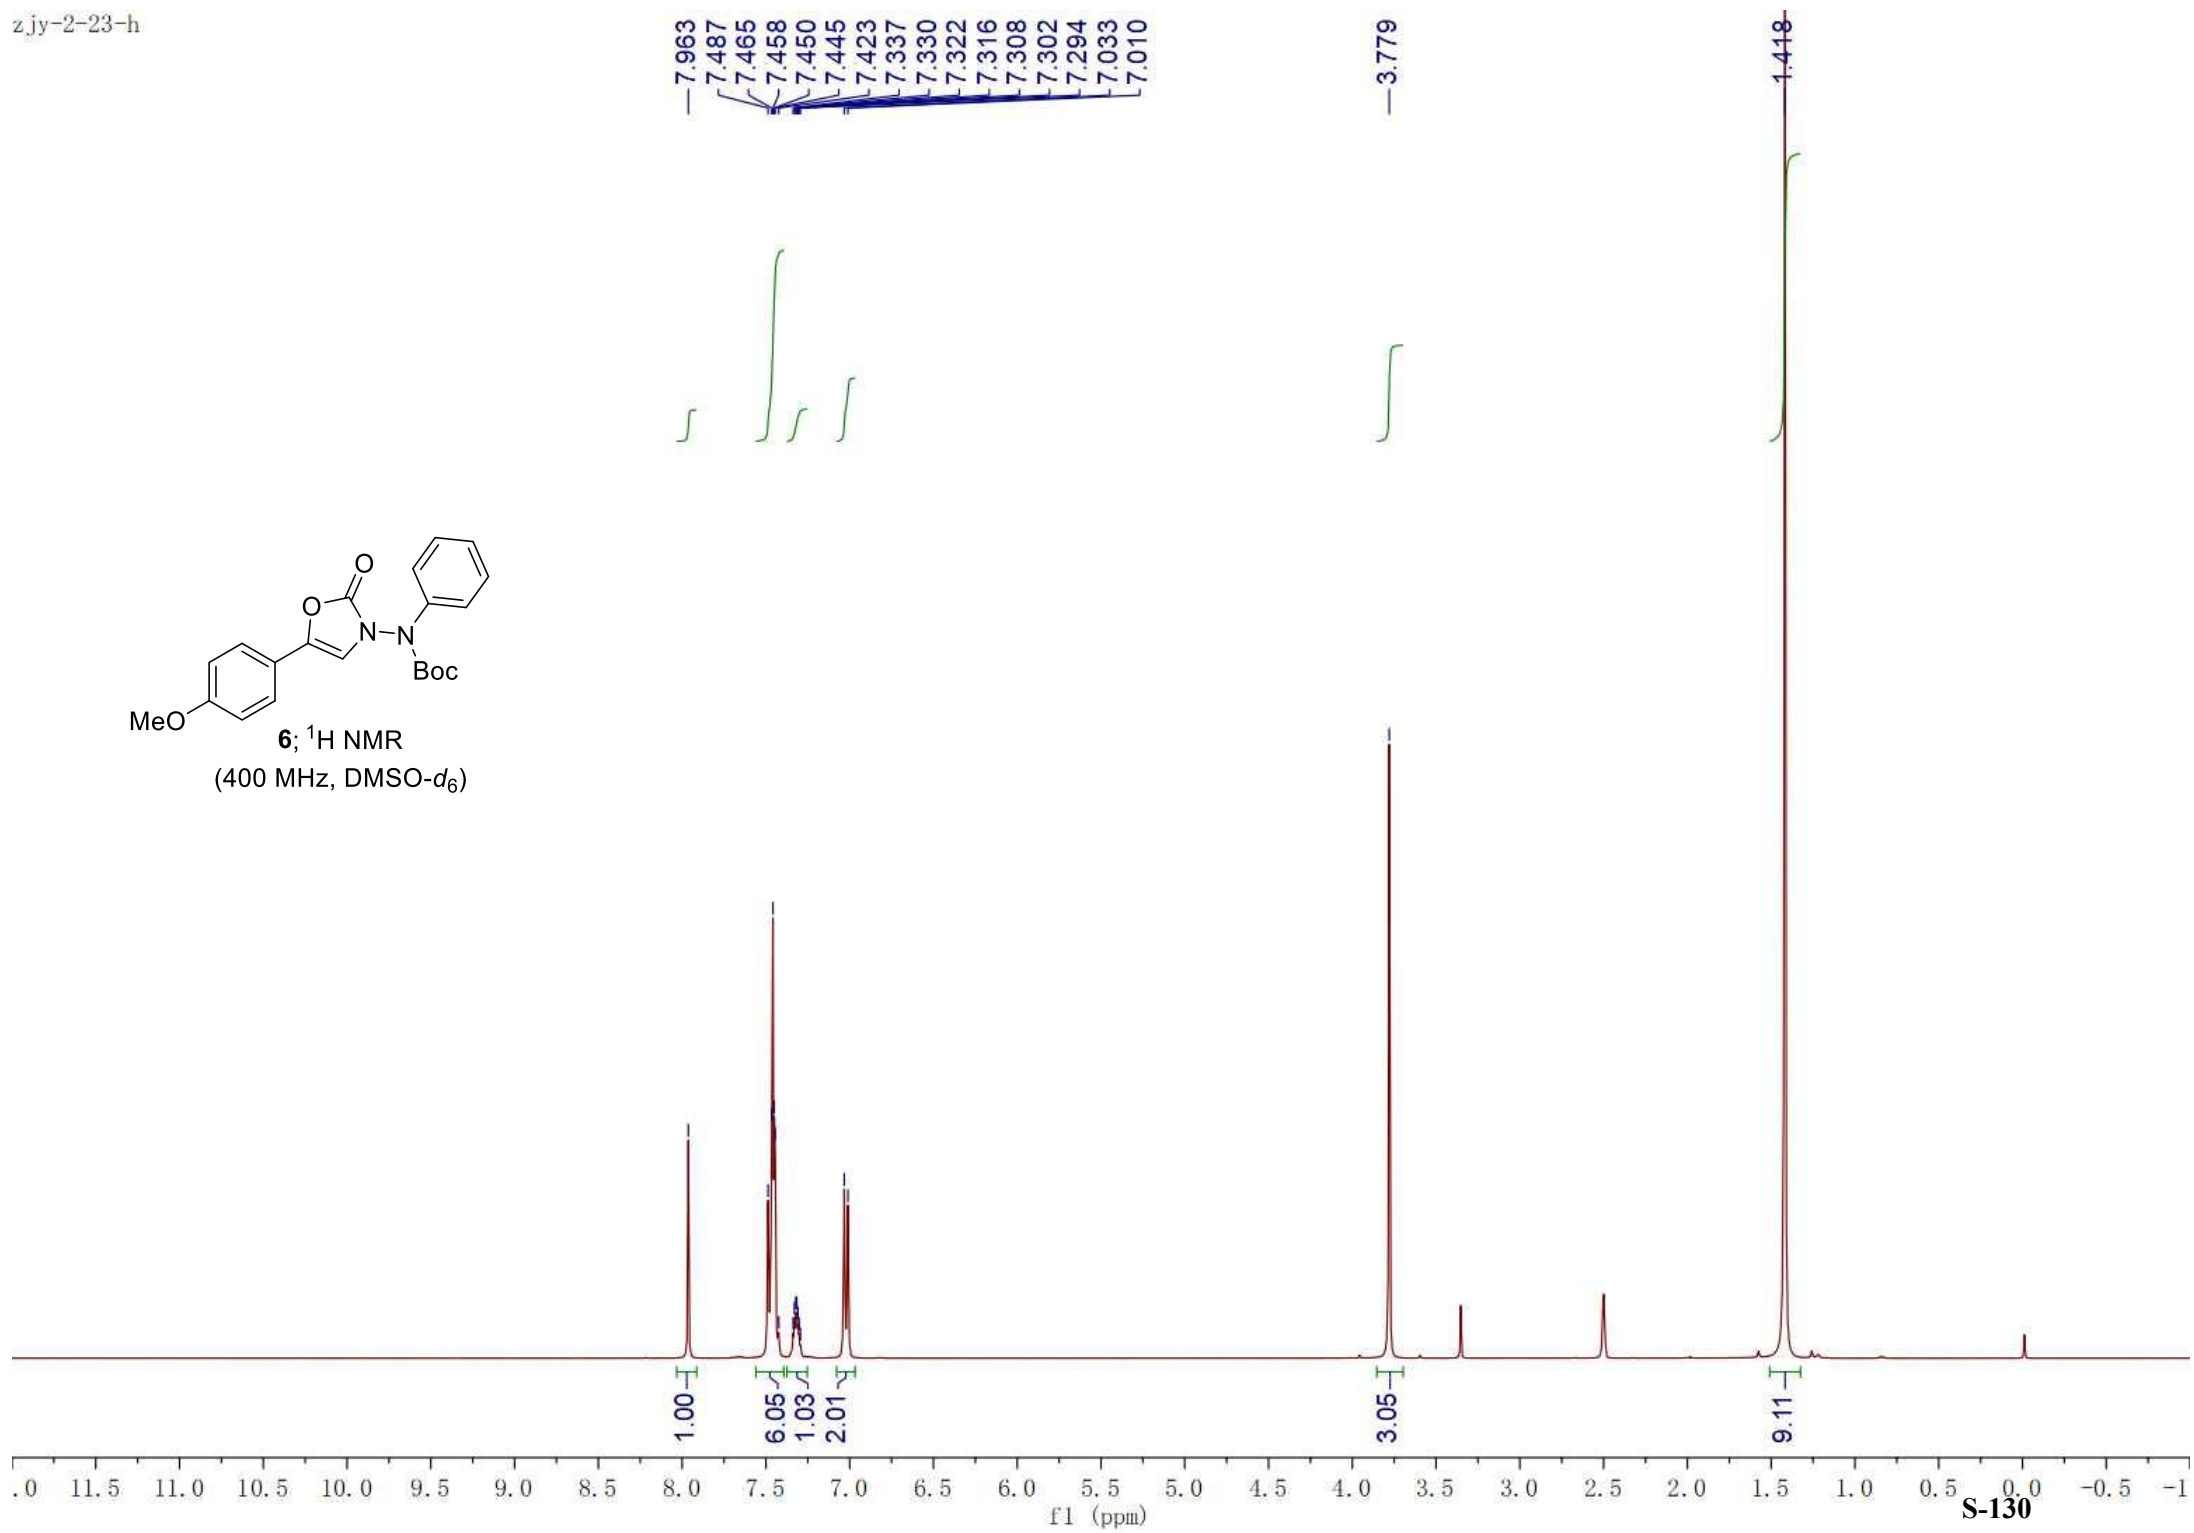

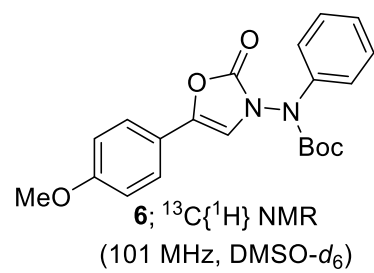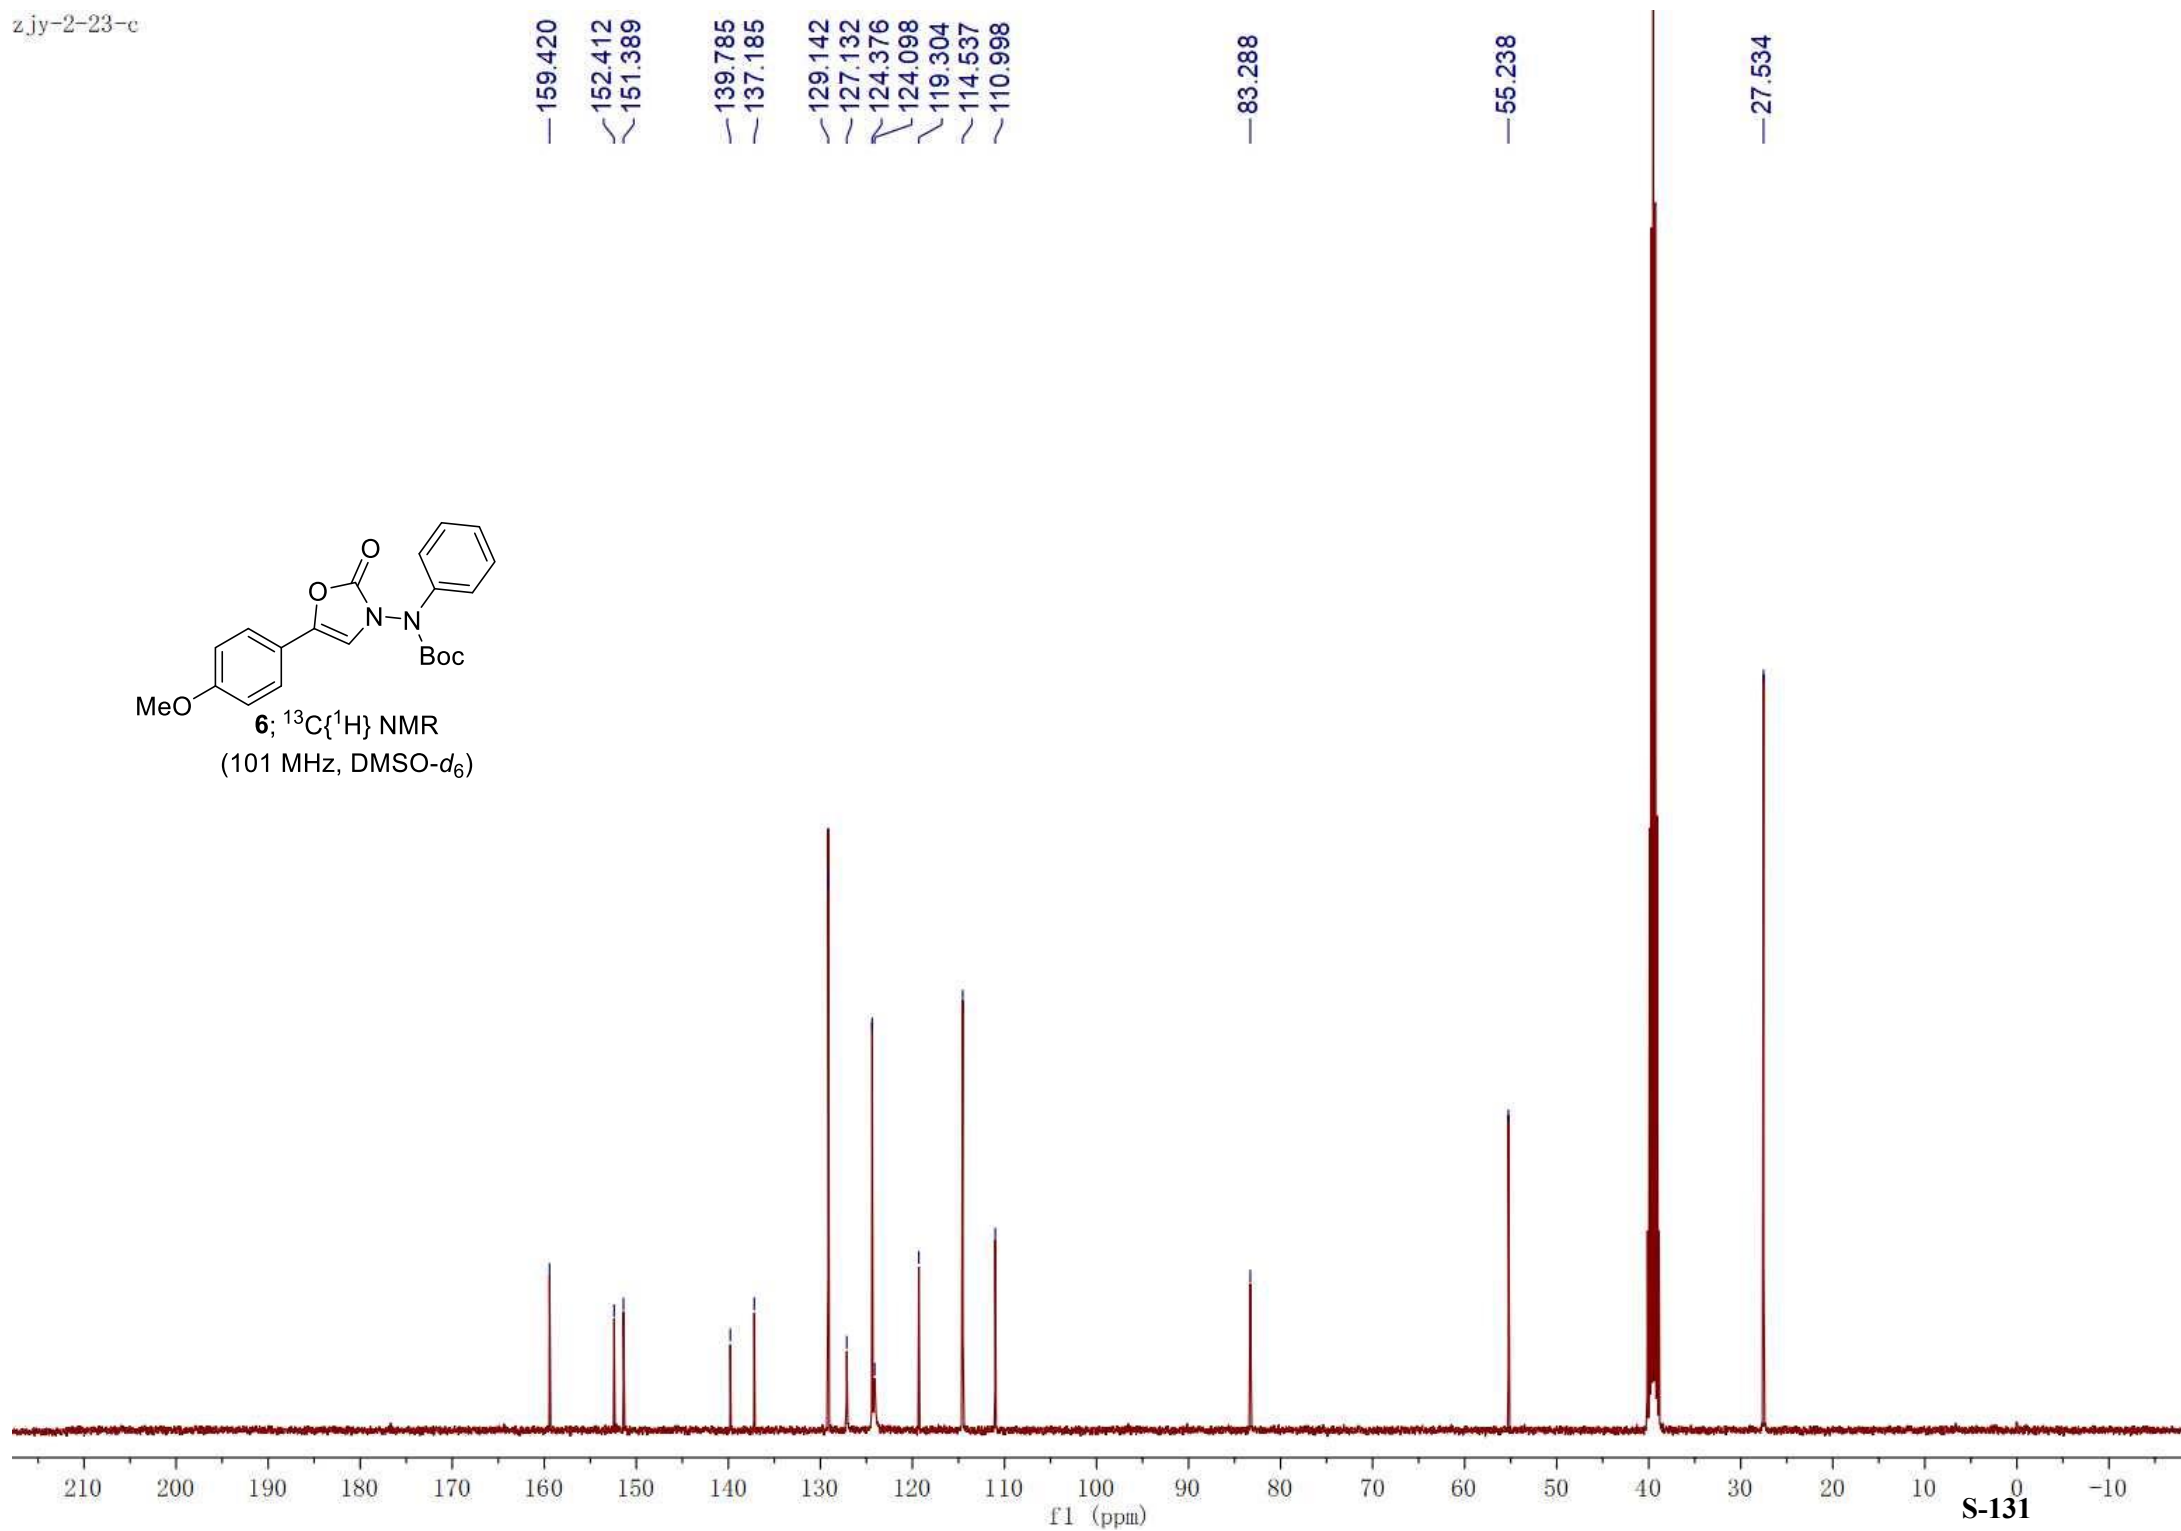



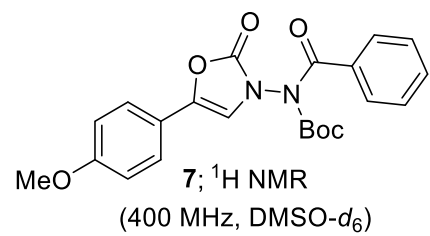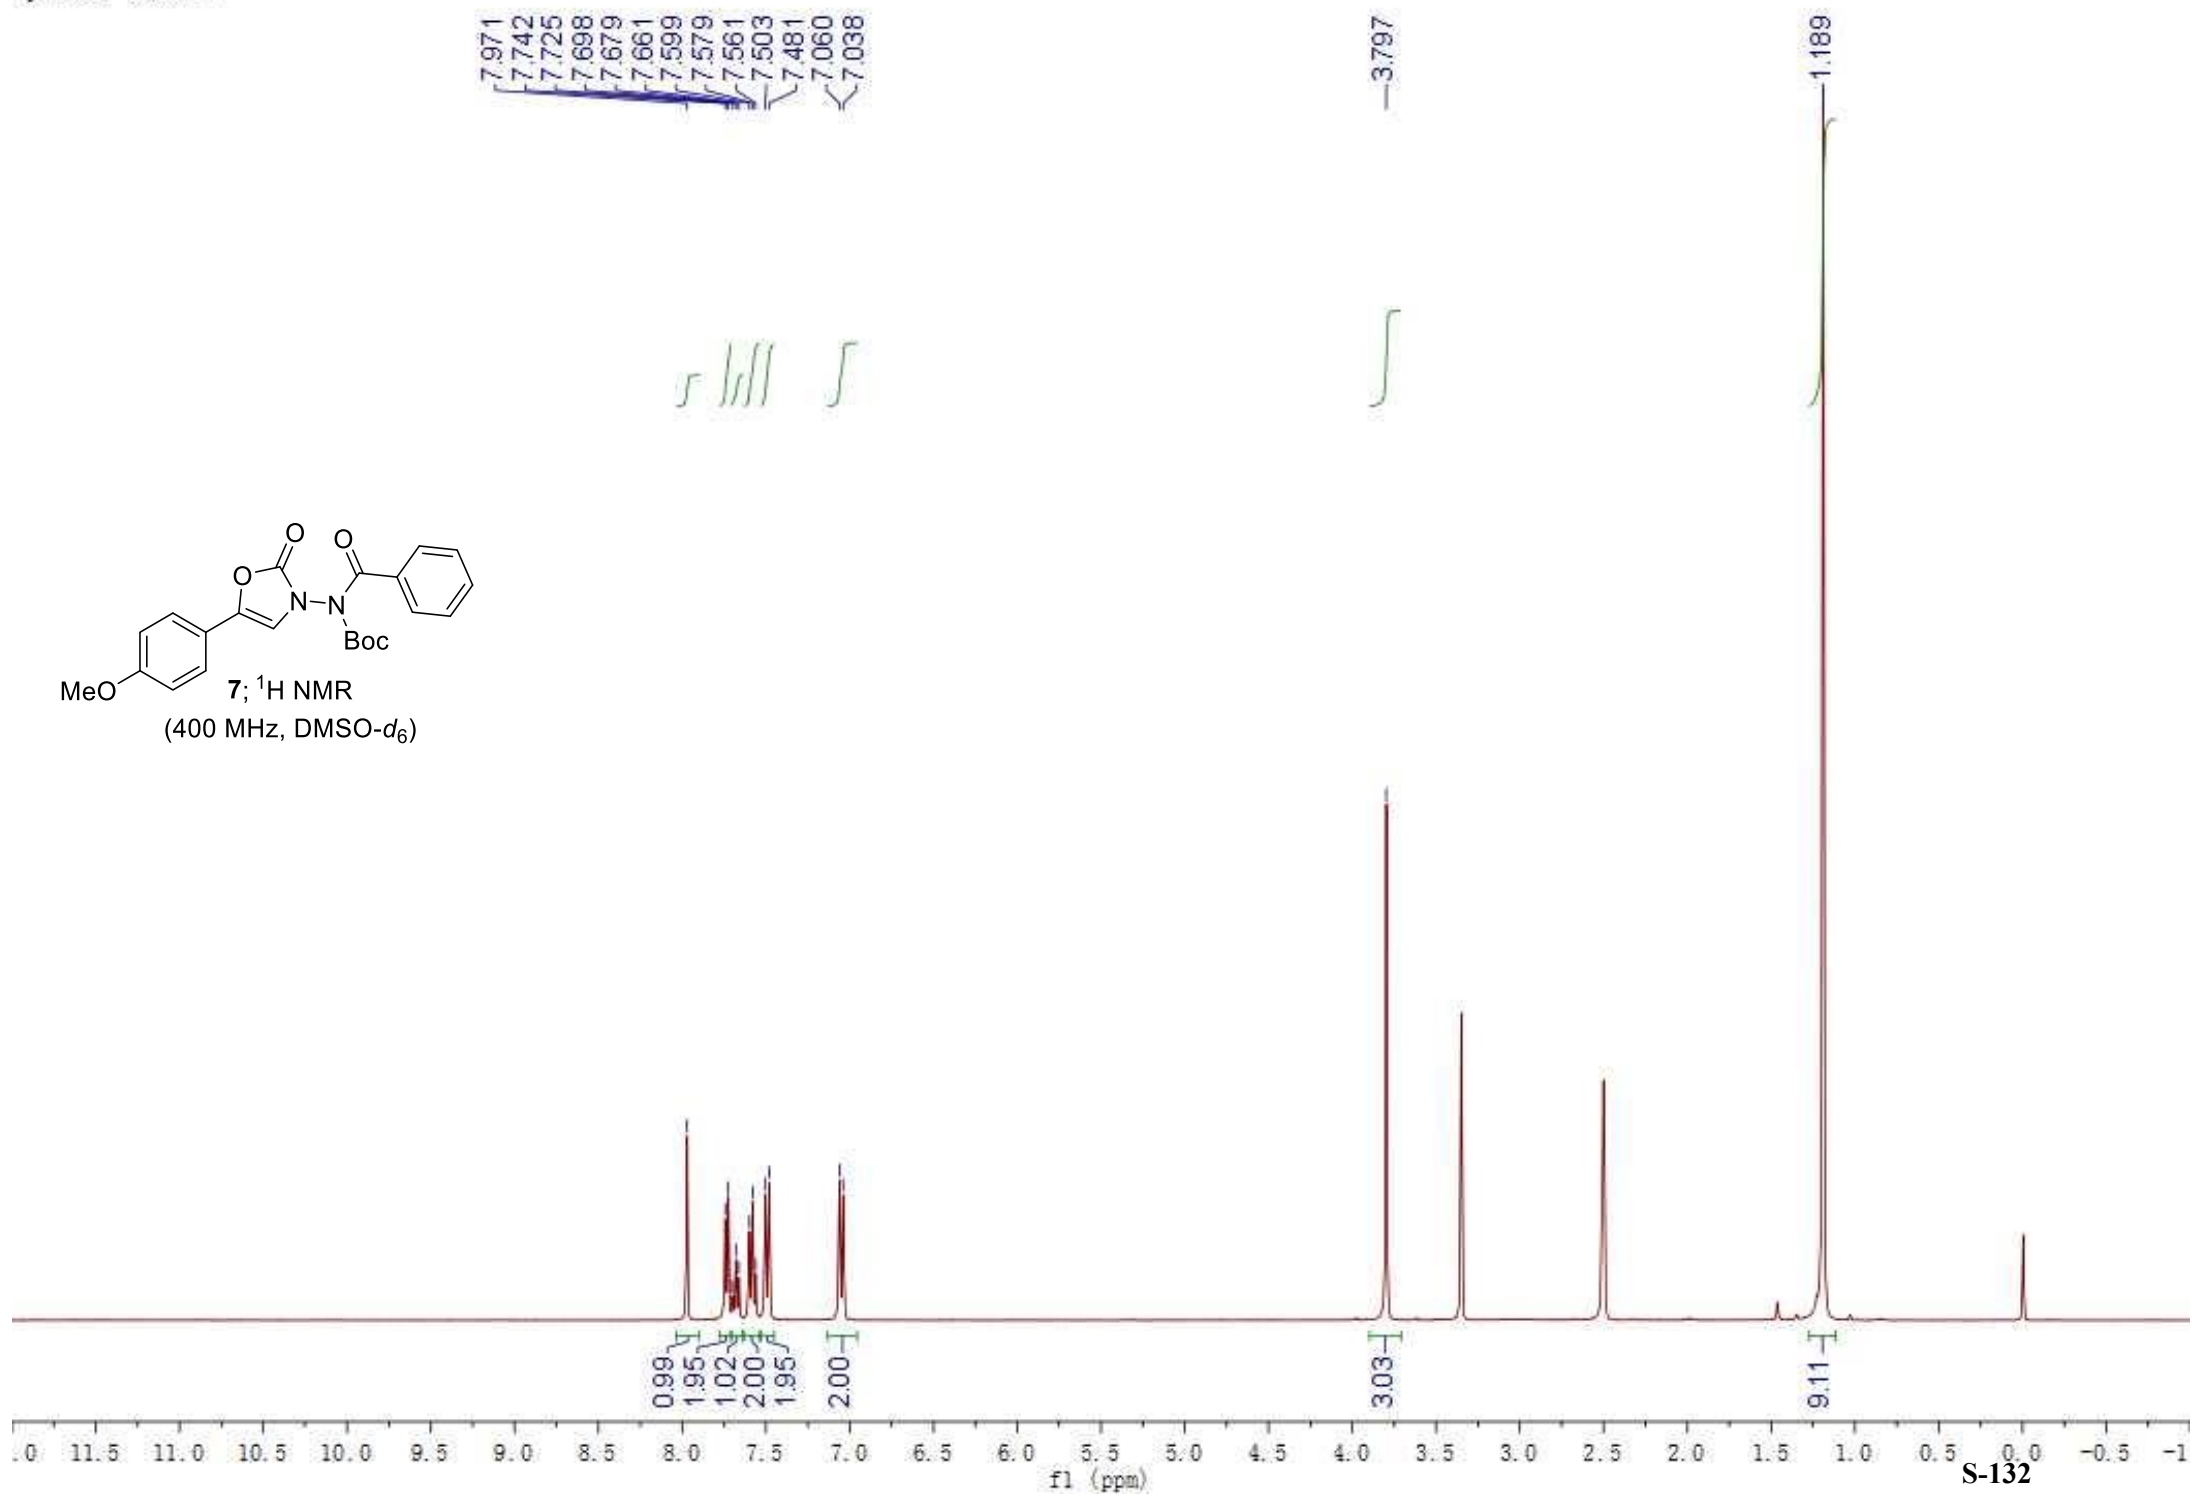



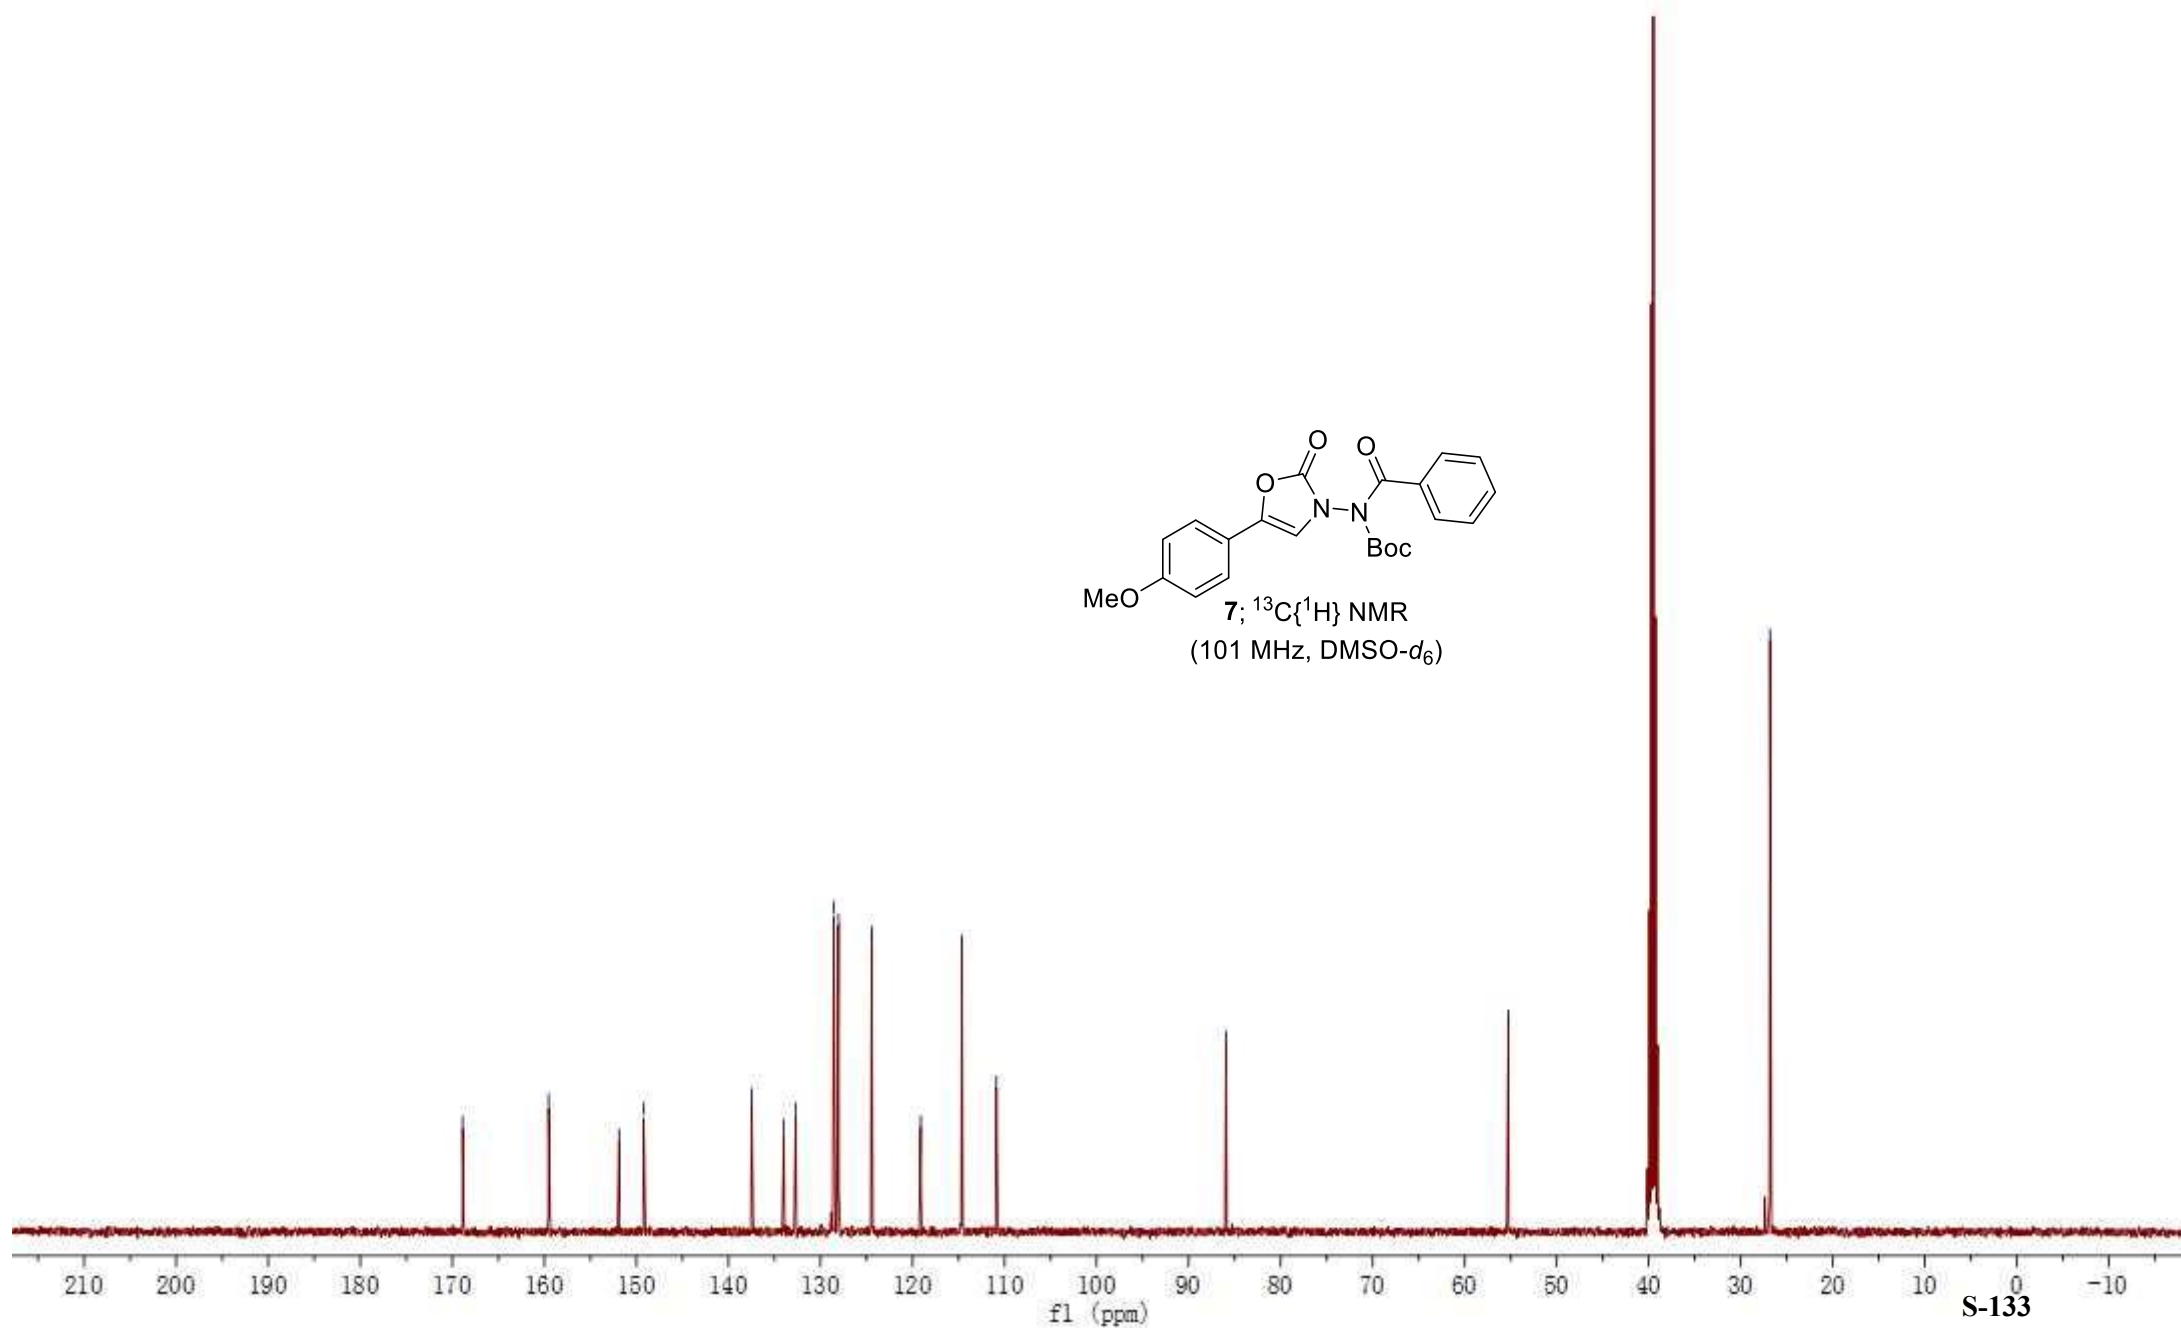

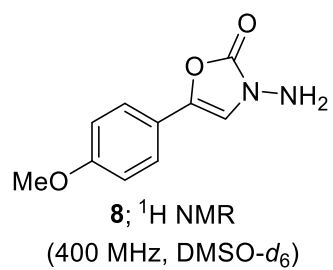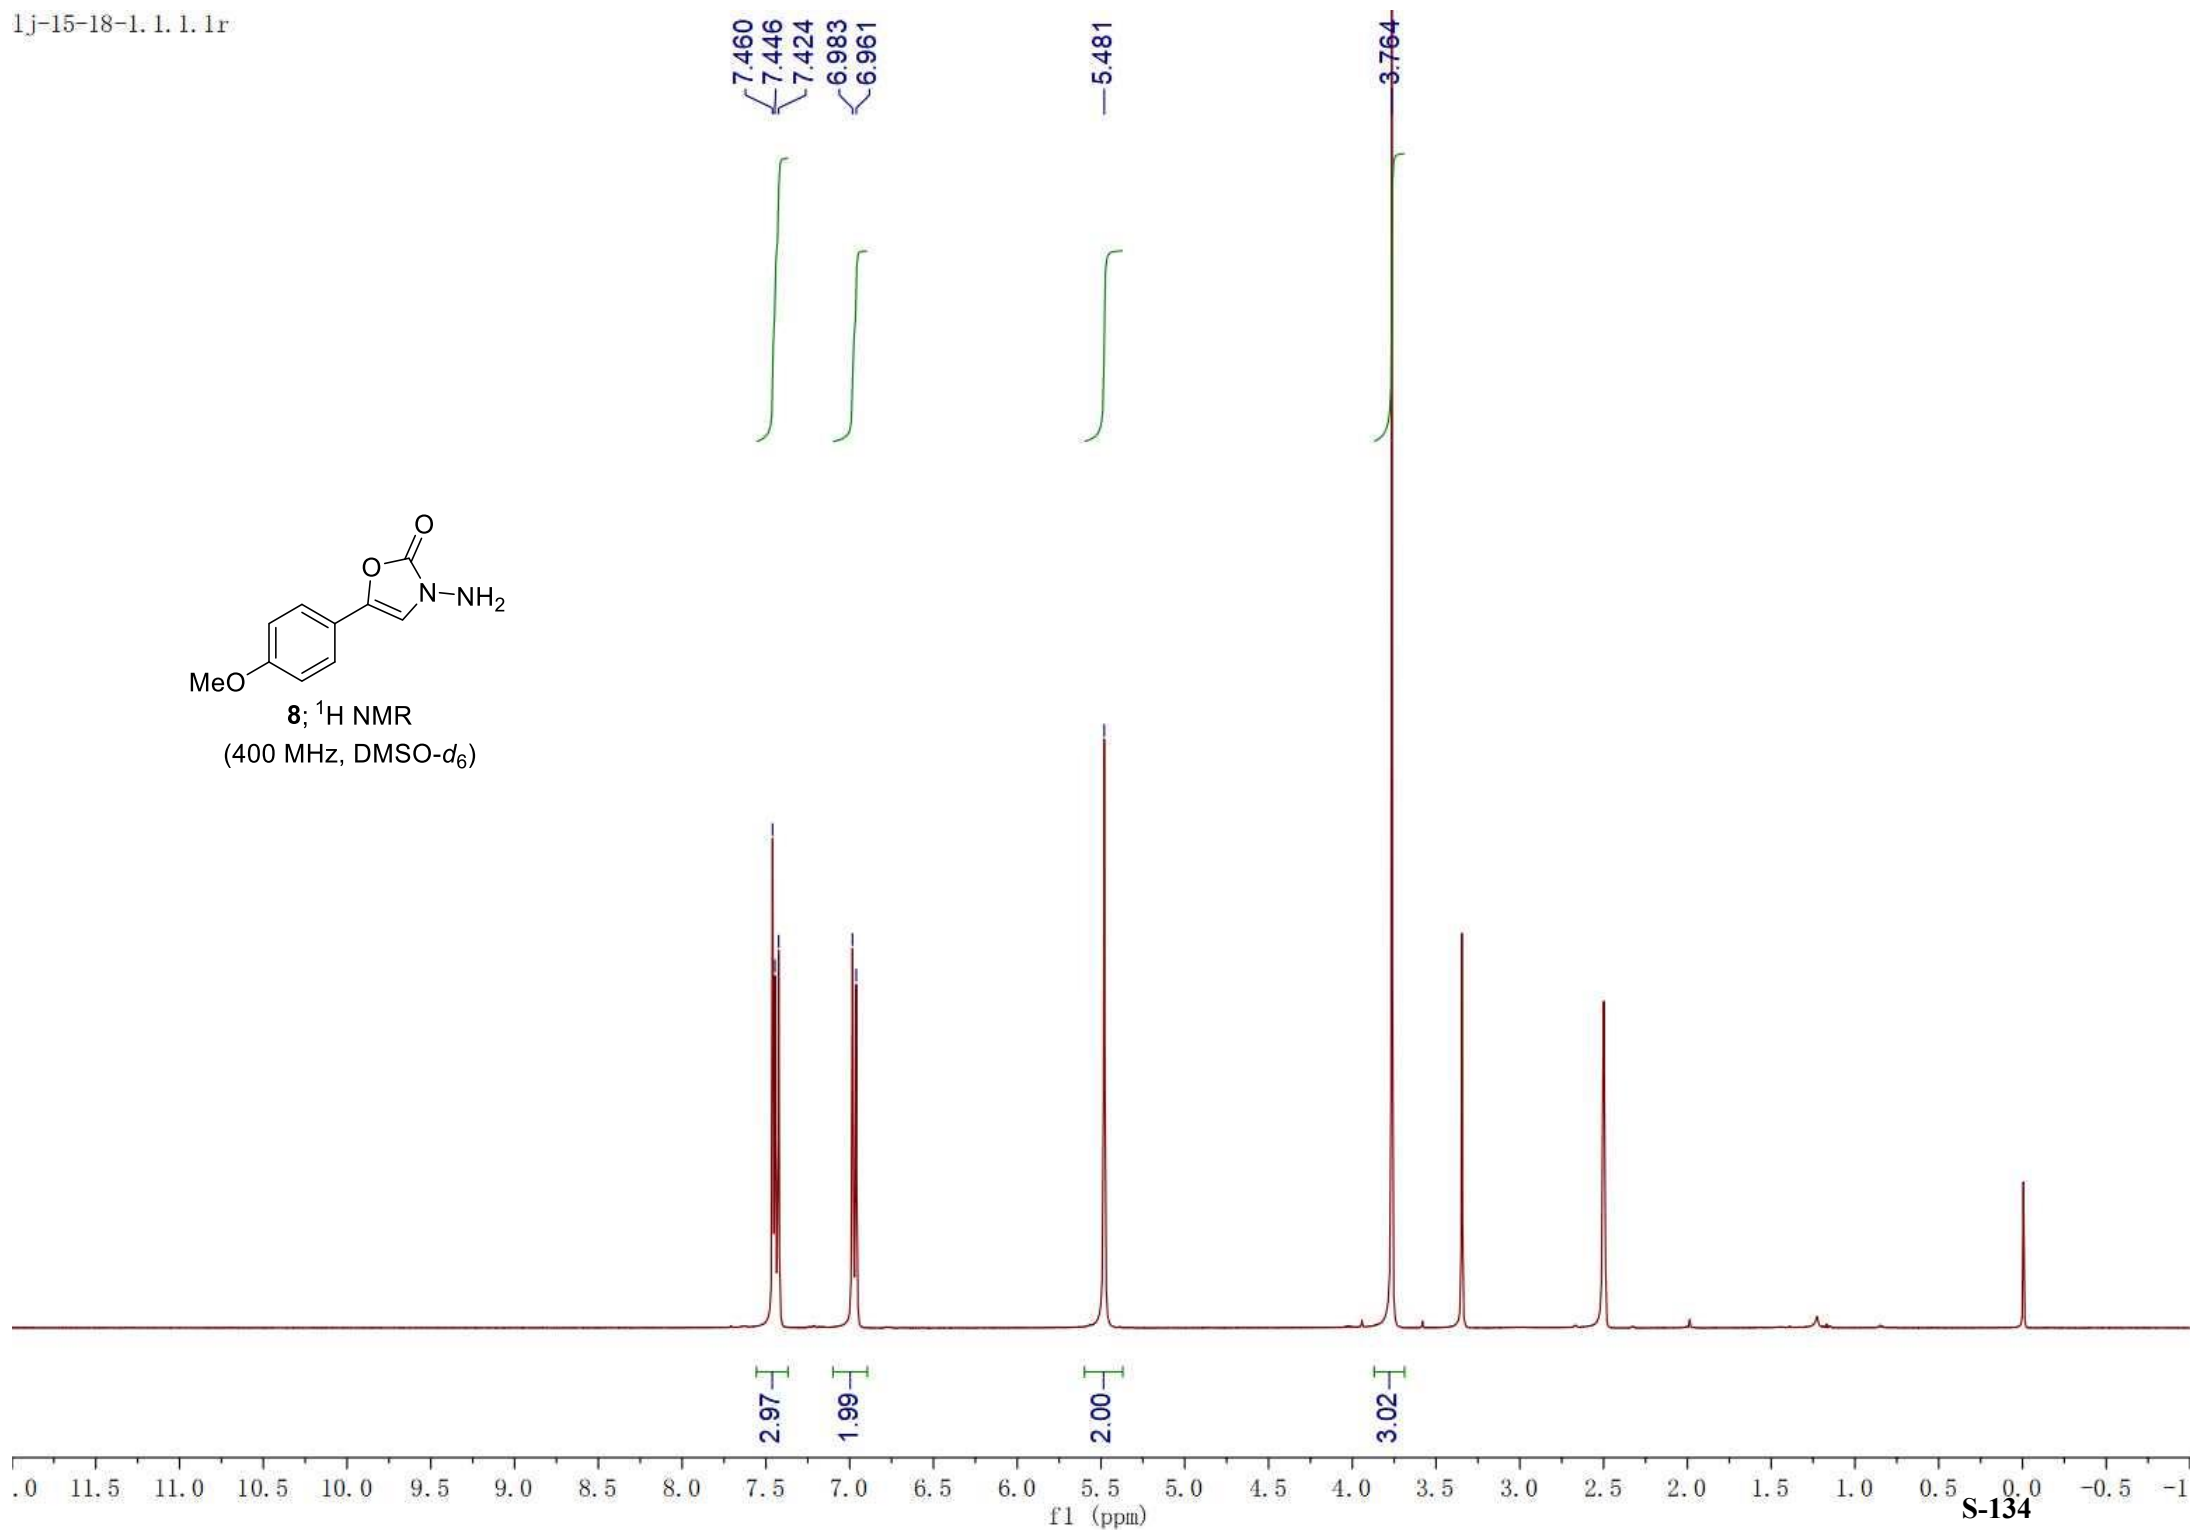

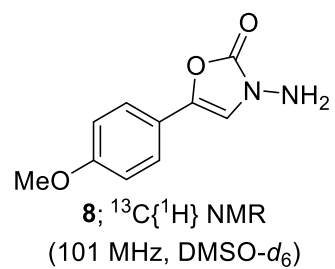

—158.745  
—154.247  
  
—134.782  
  
—123.837  
—120.332  
—114.381  
—113.441  
  
—55.187

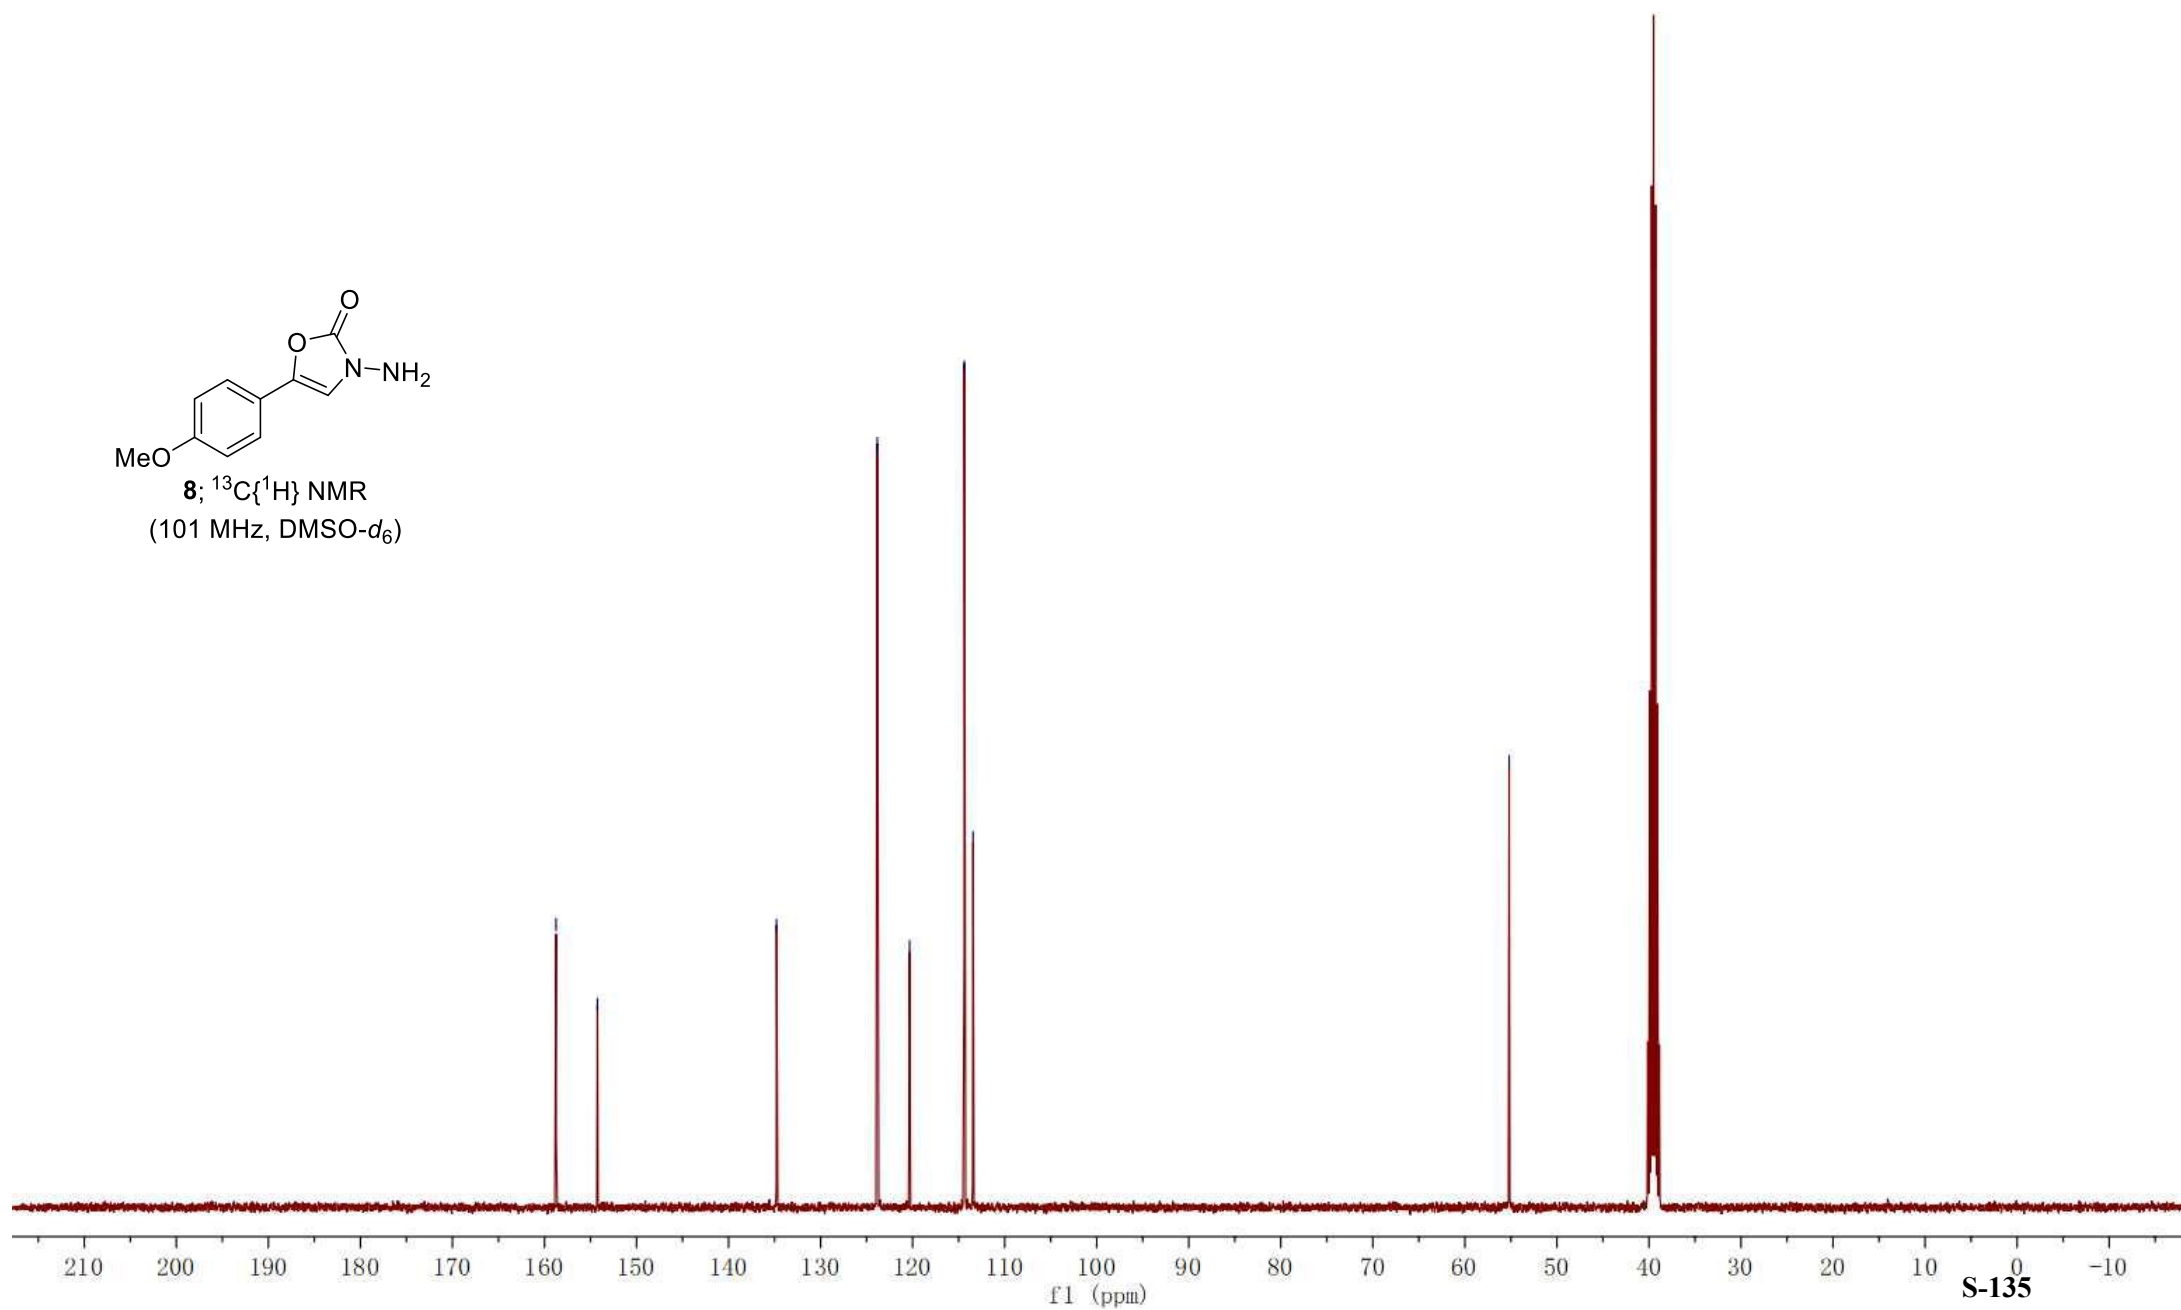

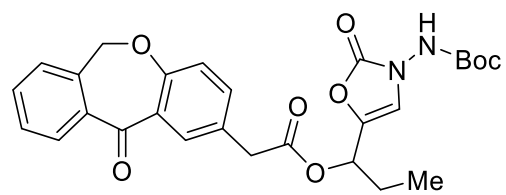

**9**;  $^1\text{H}$  NMR  
(400 MHz, DMSO- $d_6$ )

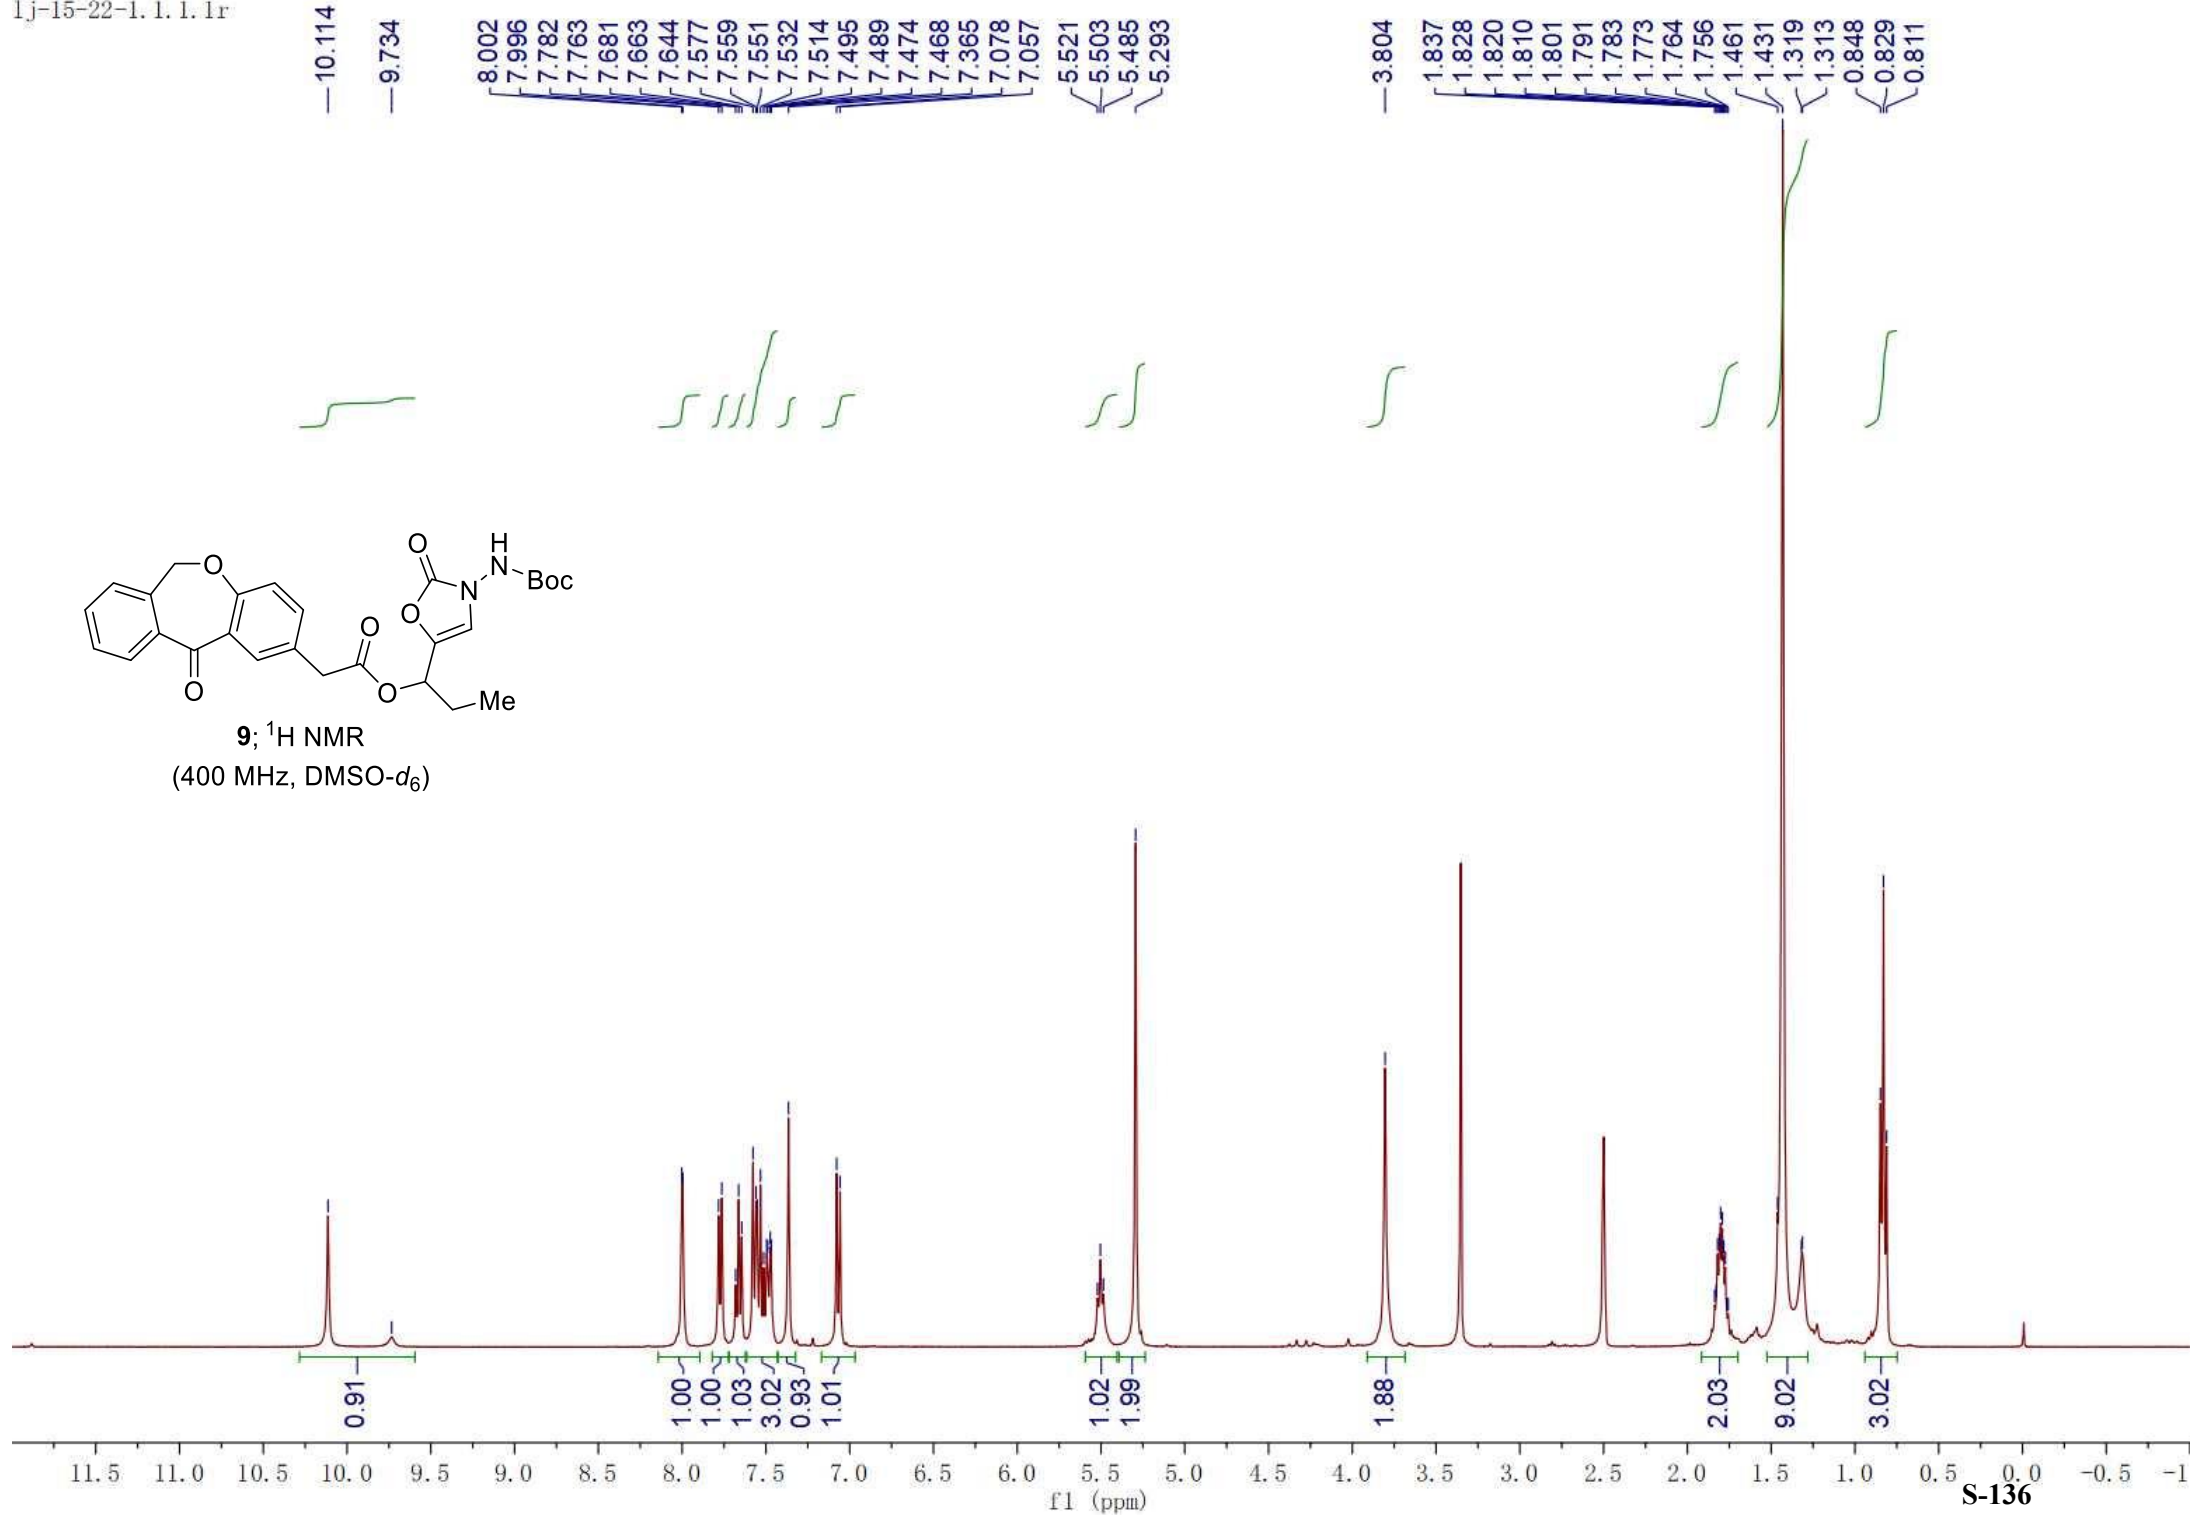

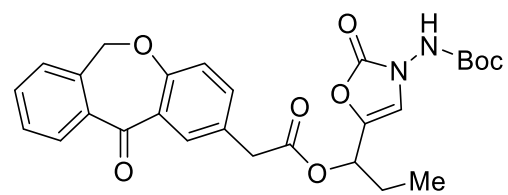

**9**;  $^{13}\text{C}\{^1\text{H}\}$  NMR  
(101 MHz, DMSO- $d_6$ )

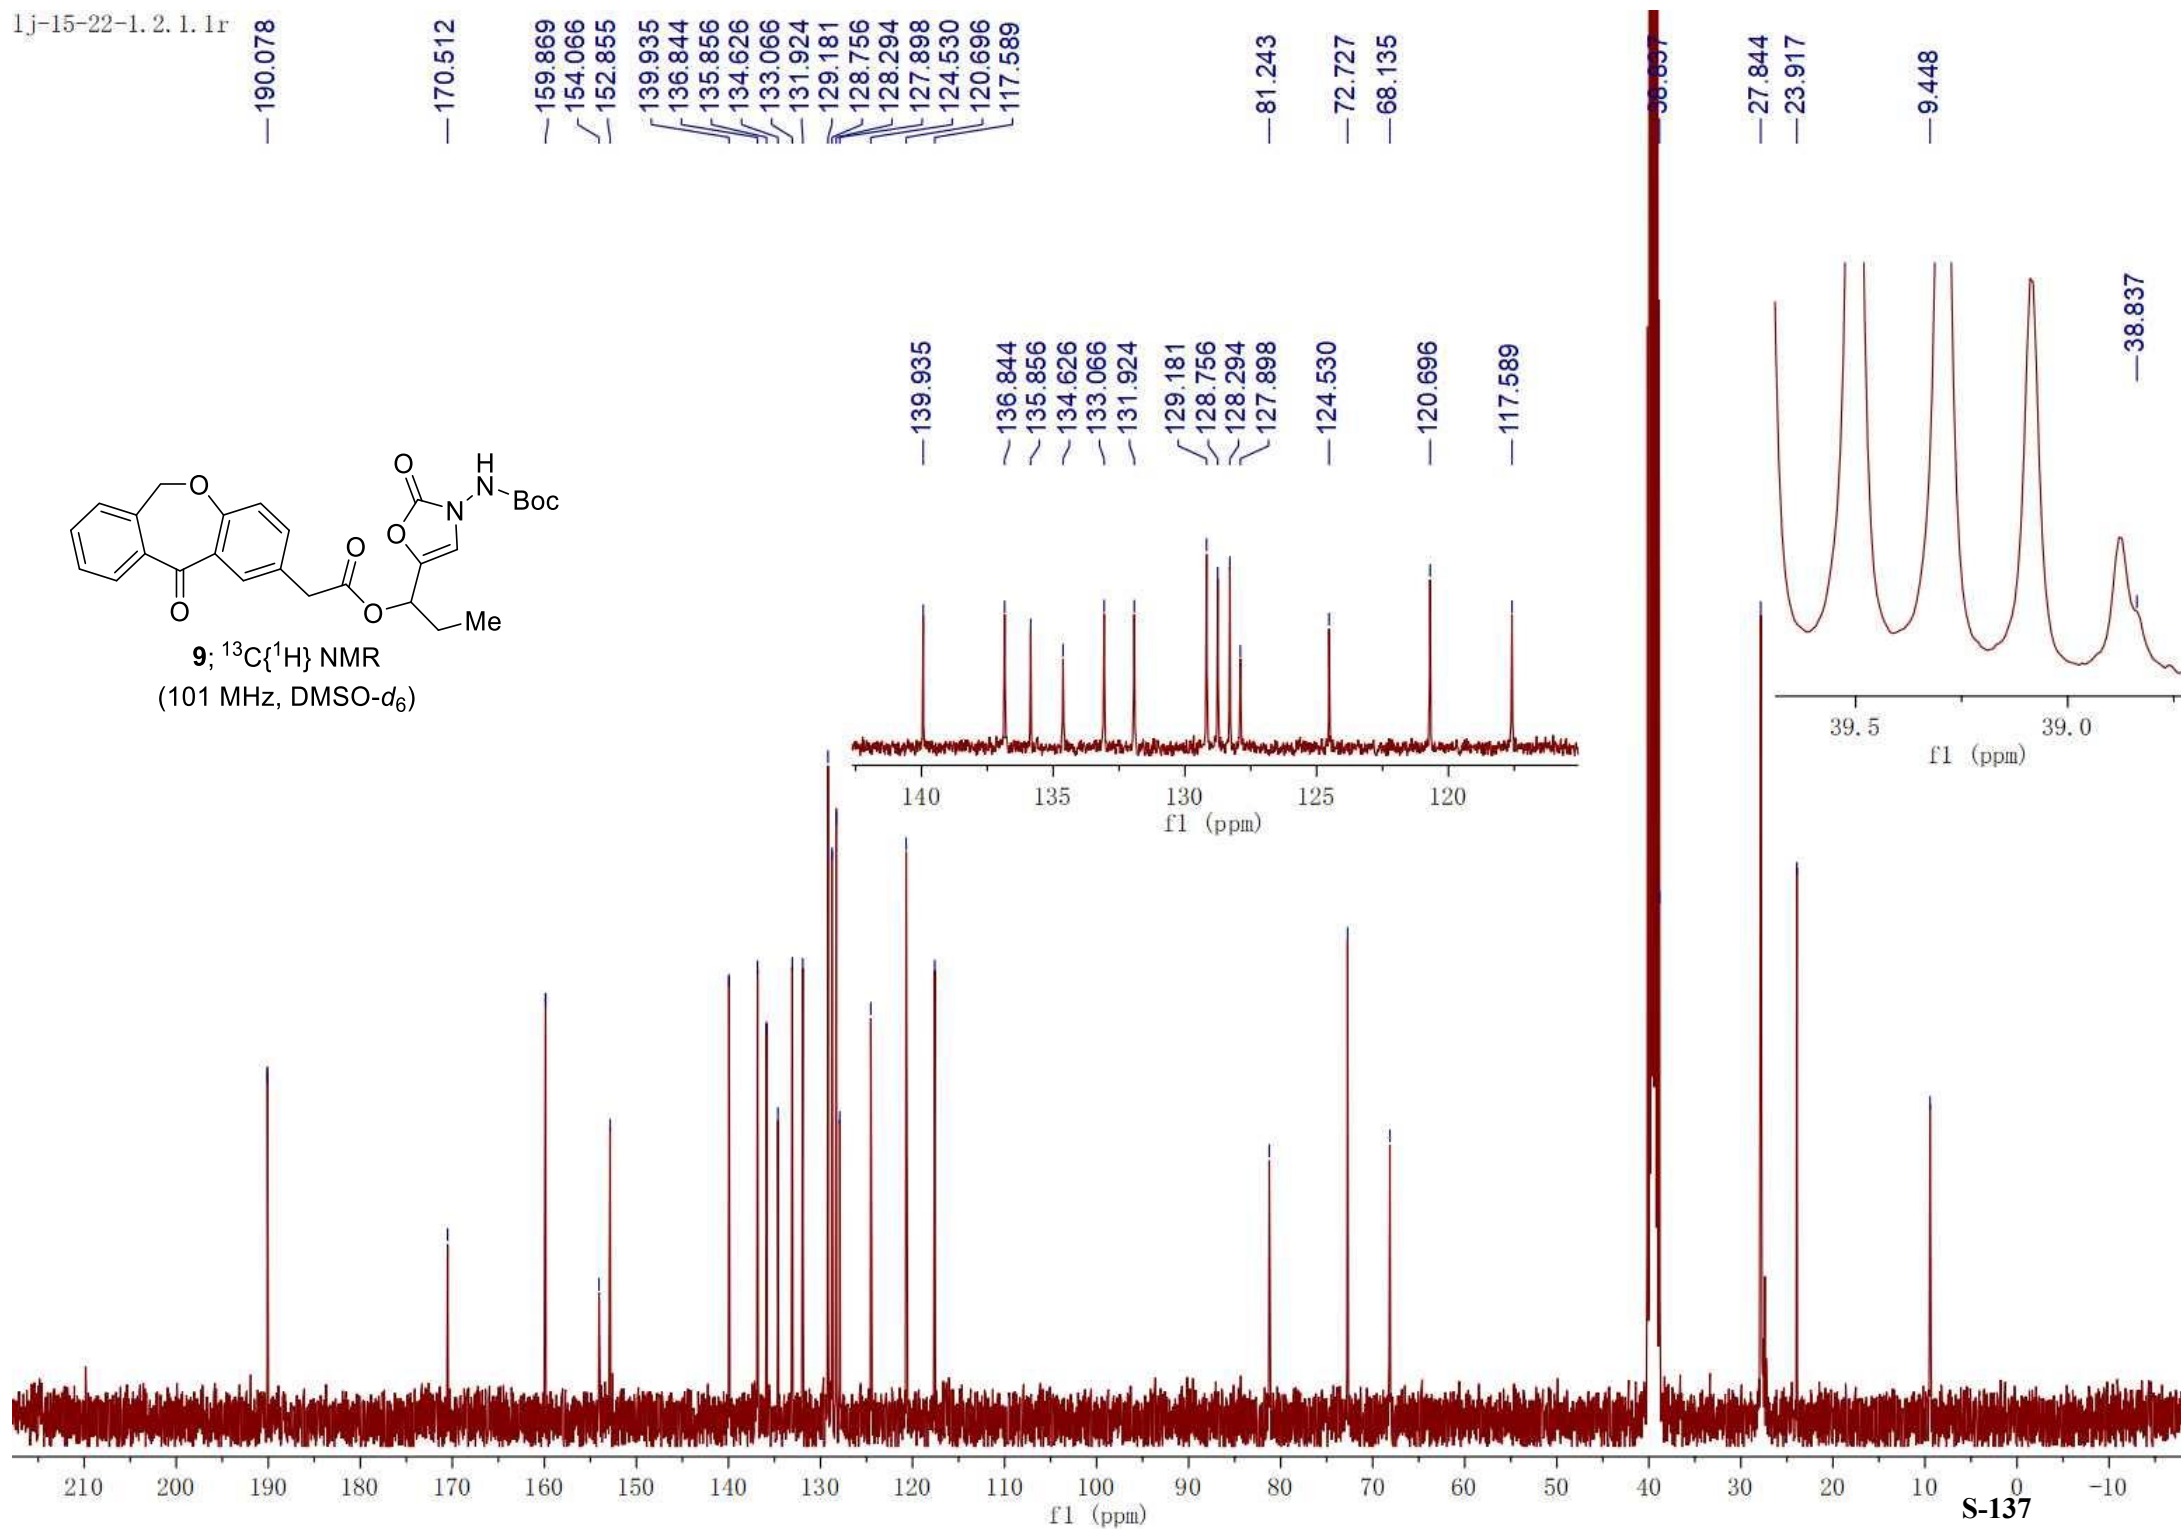

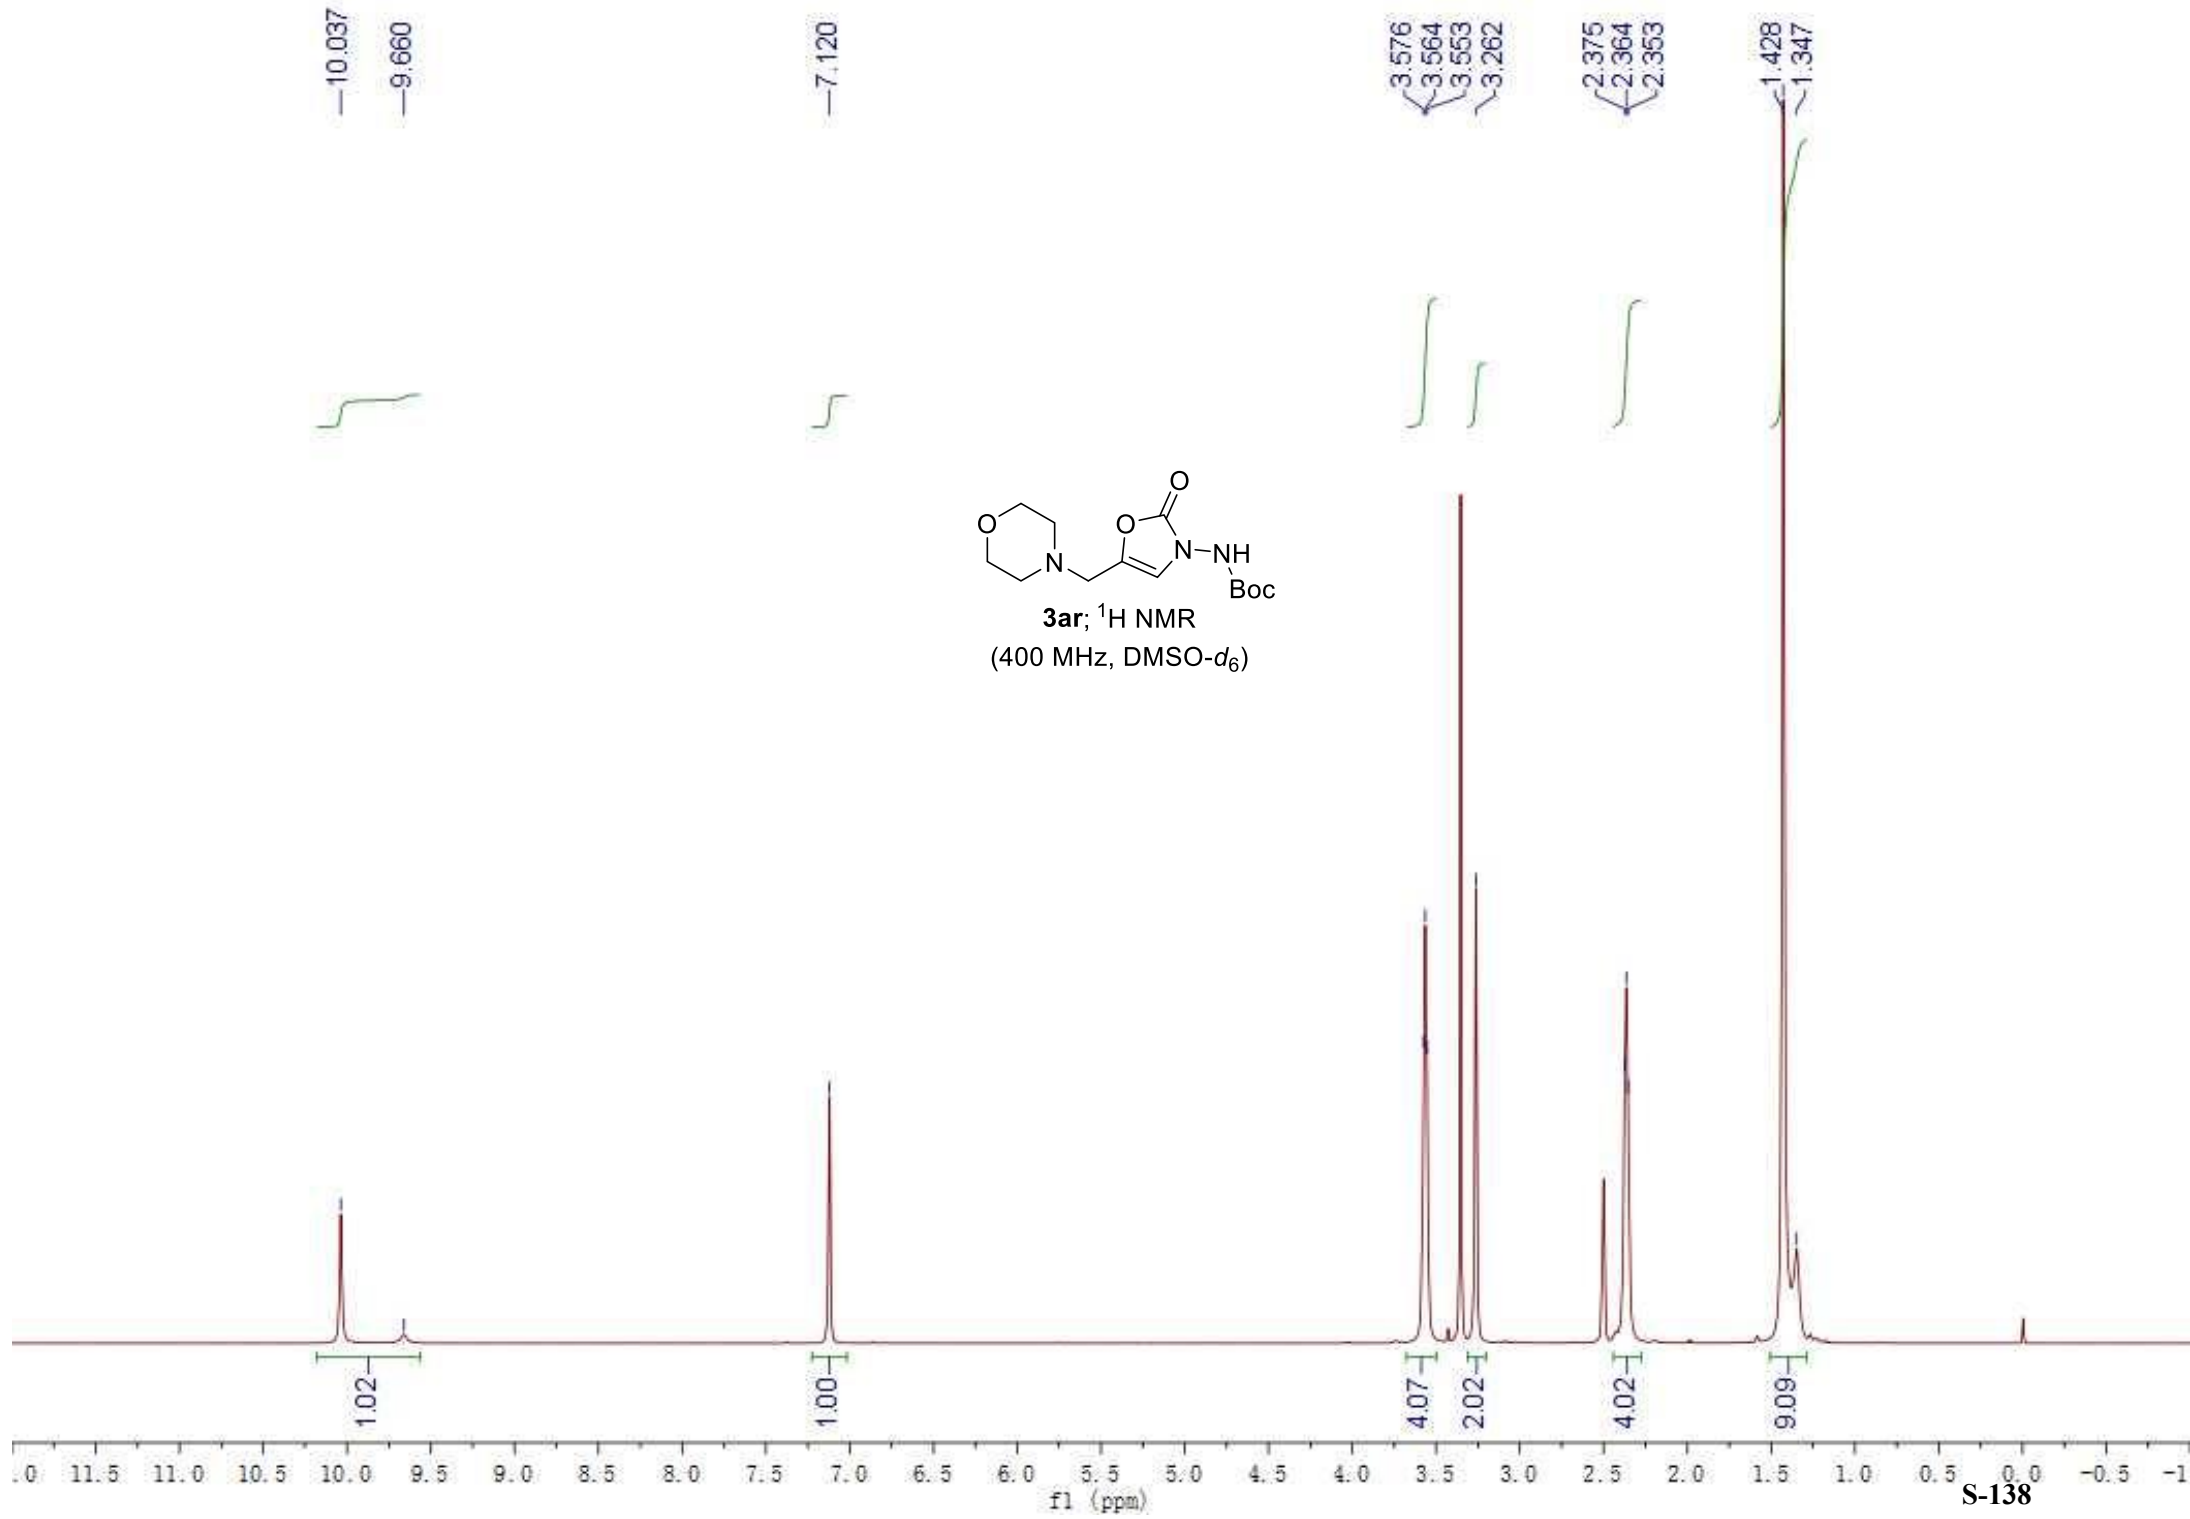

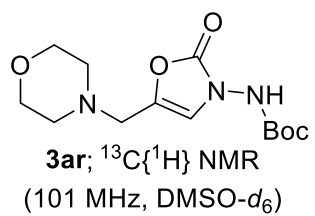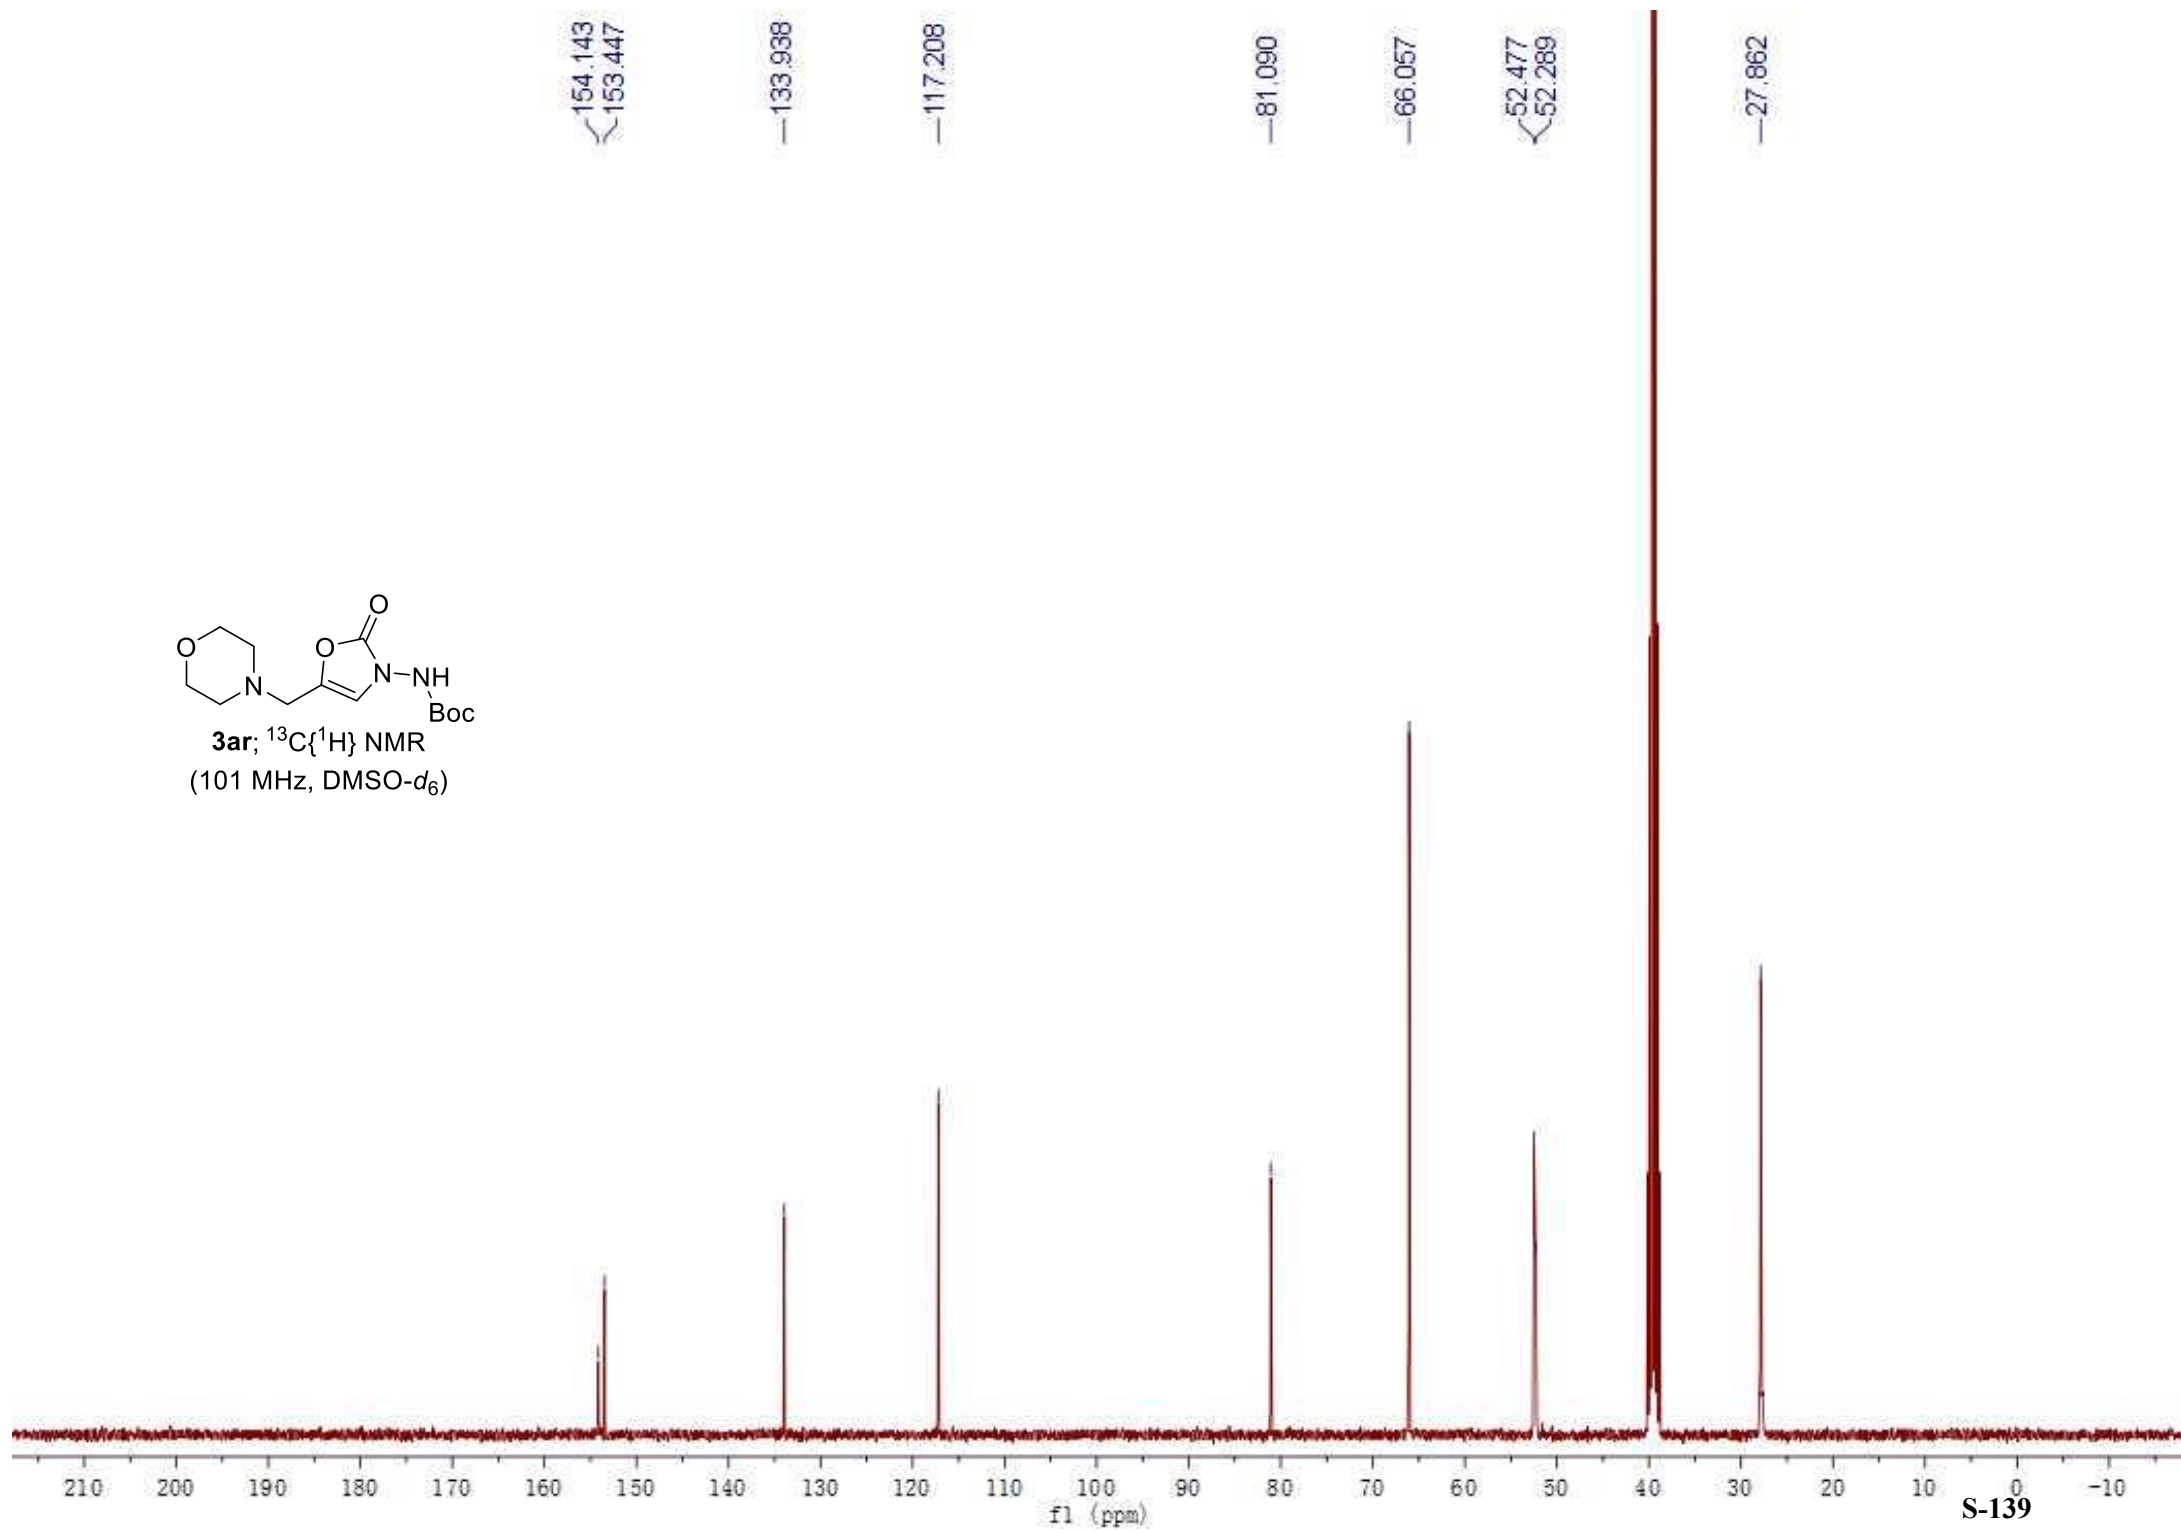

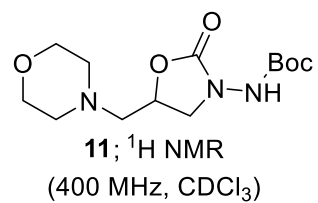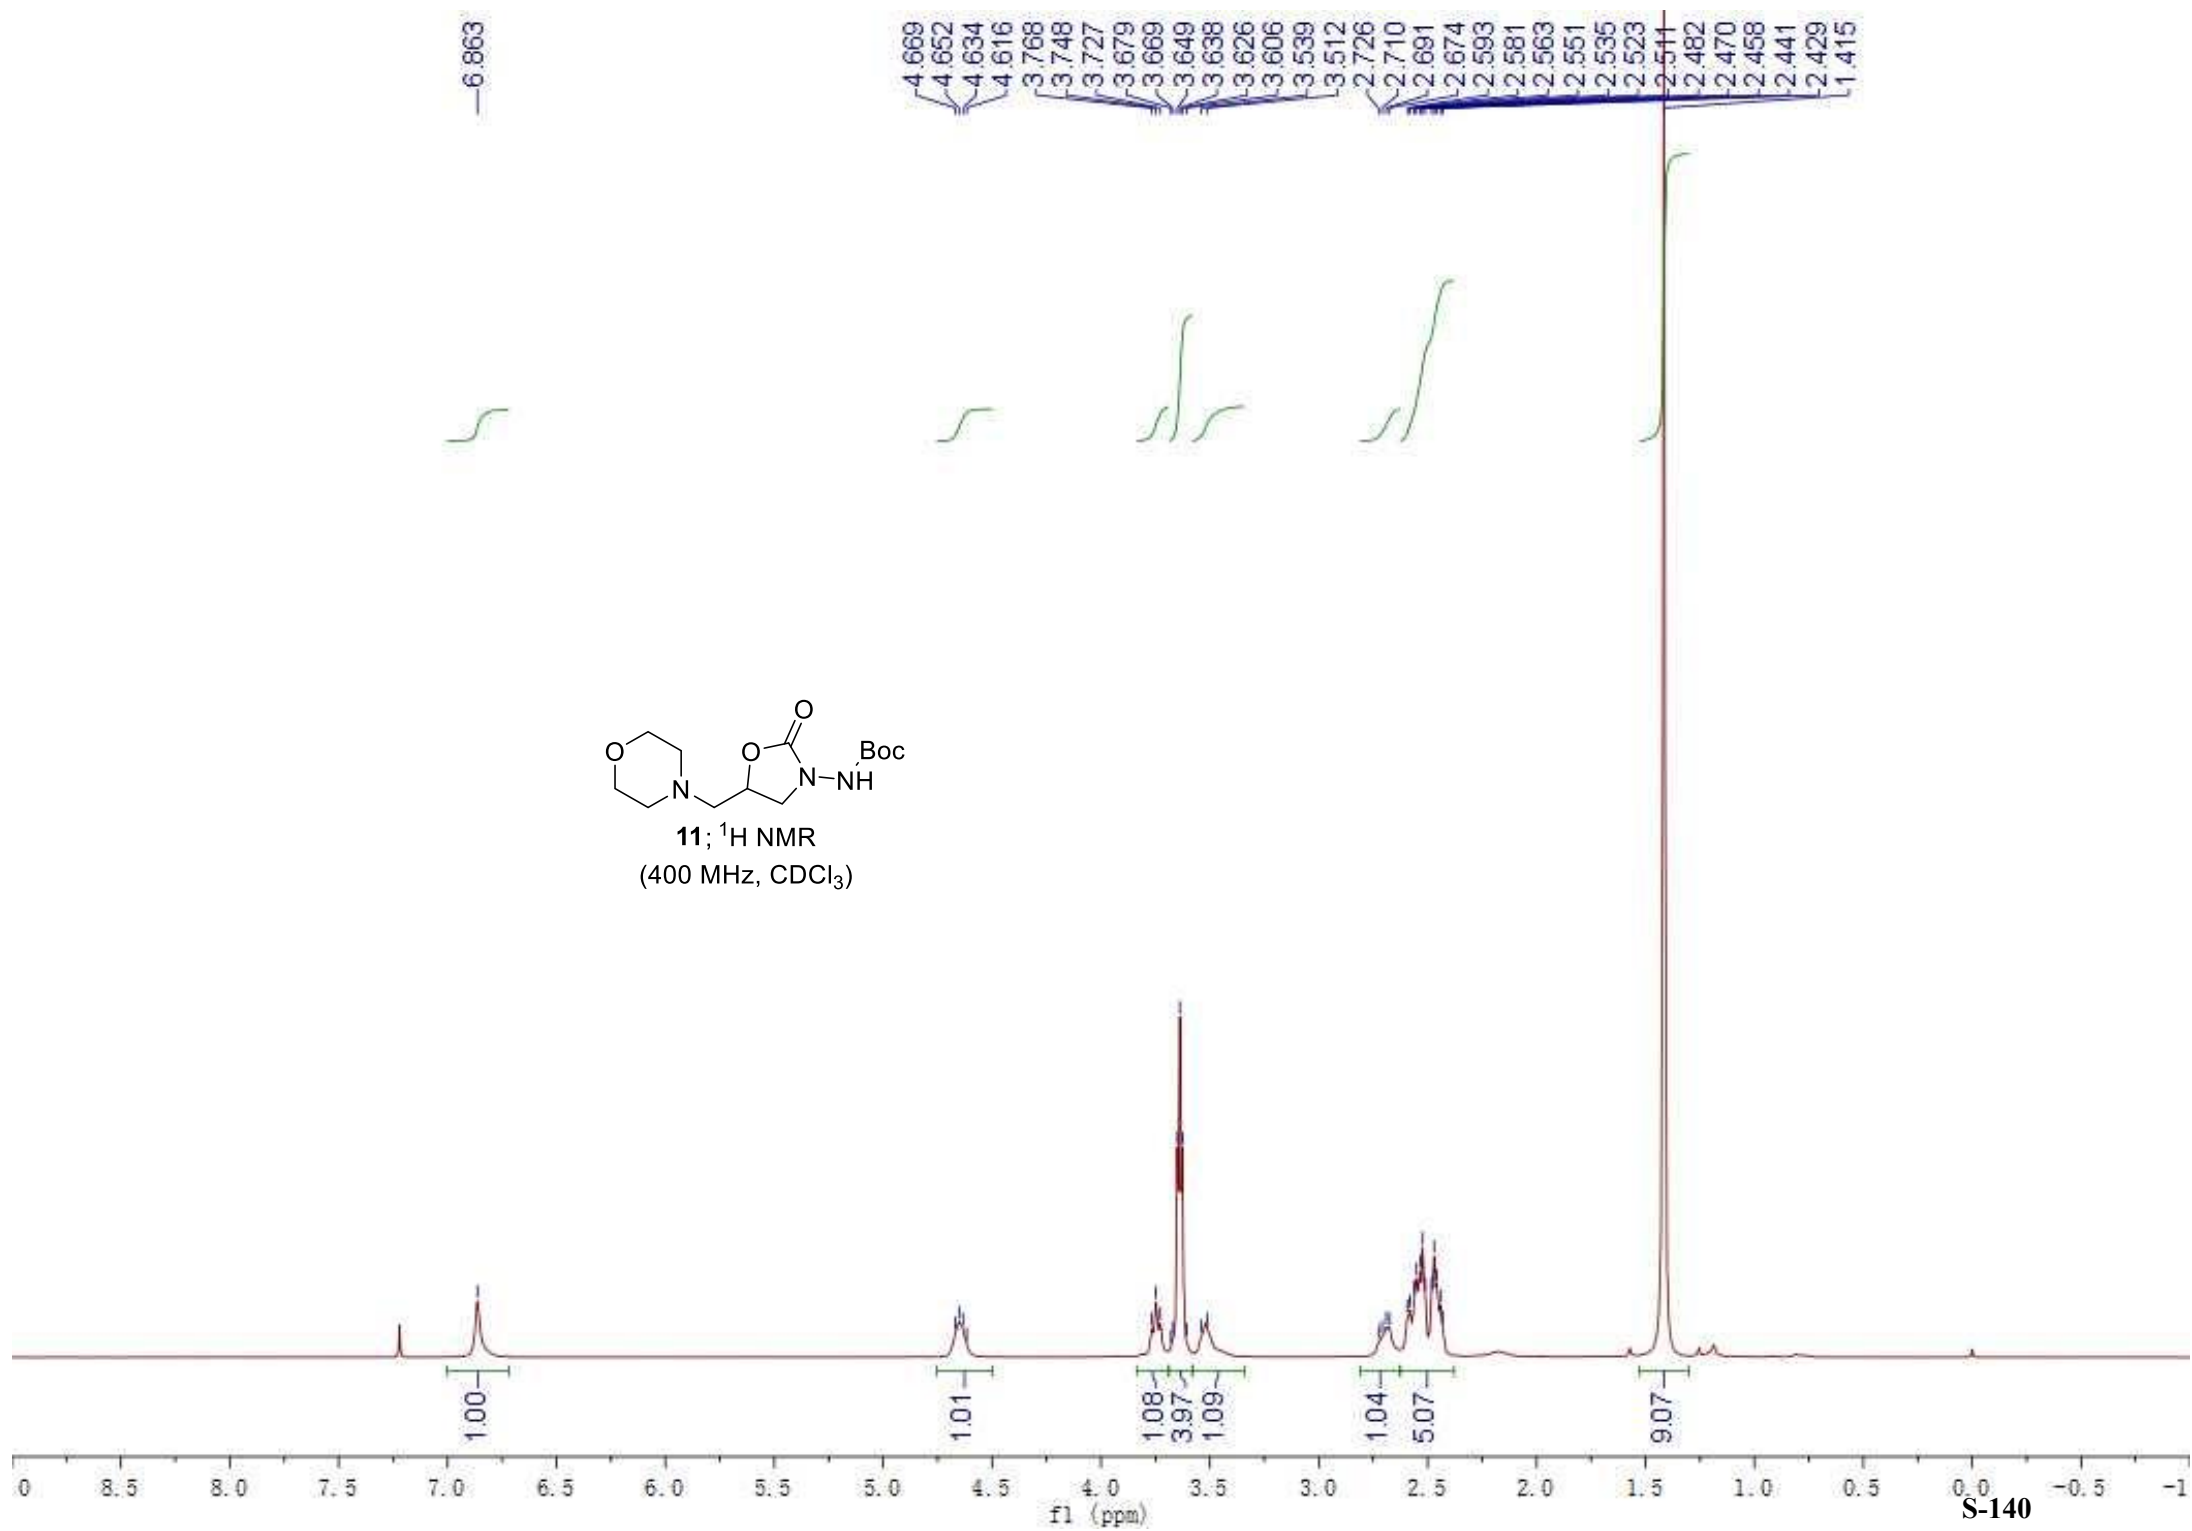



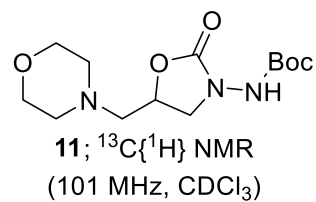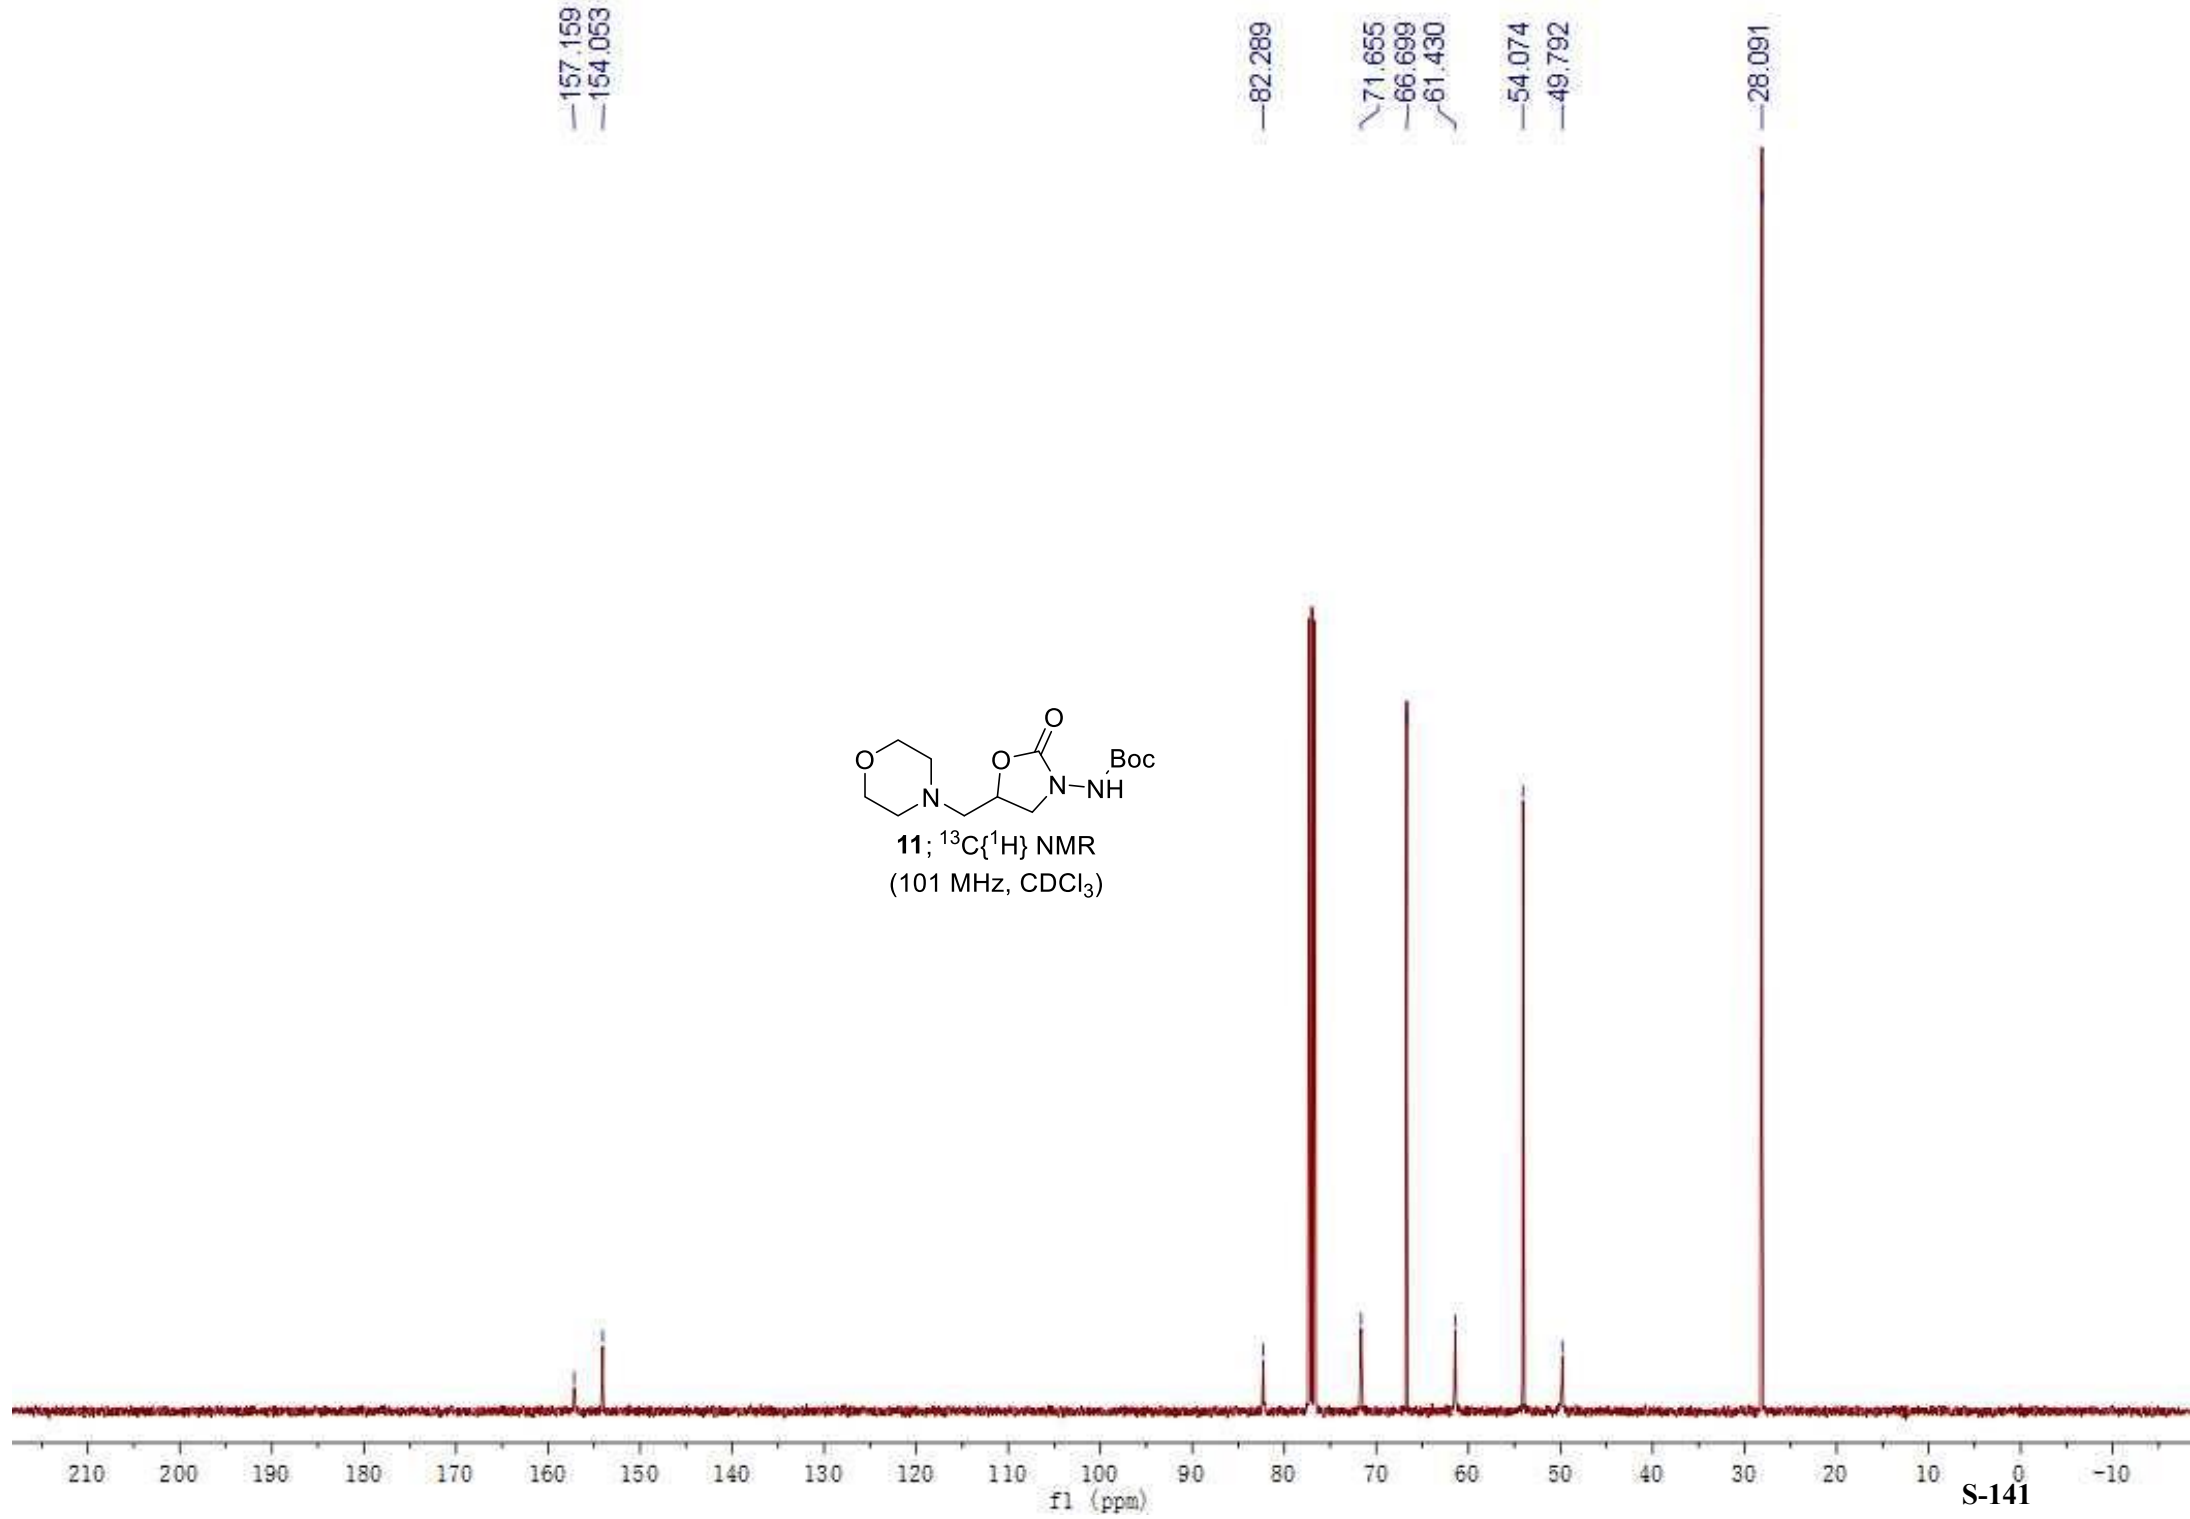

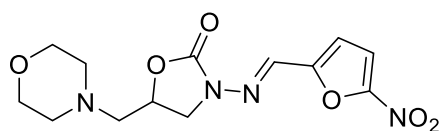

**Fulratadone**;  $^1\text{H}$  NMR  
(400 MHz,  $\text{DMSO}-d_6$ )

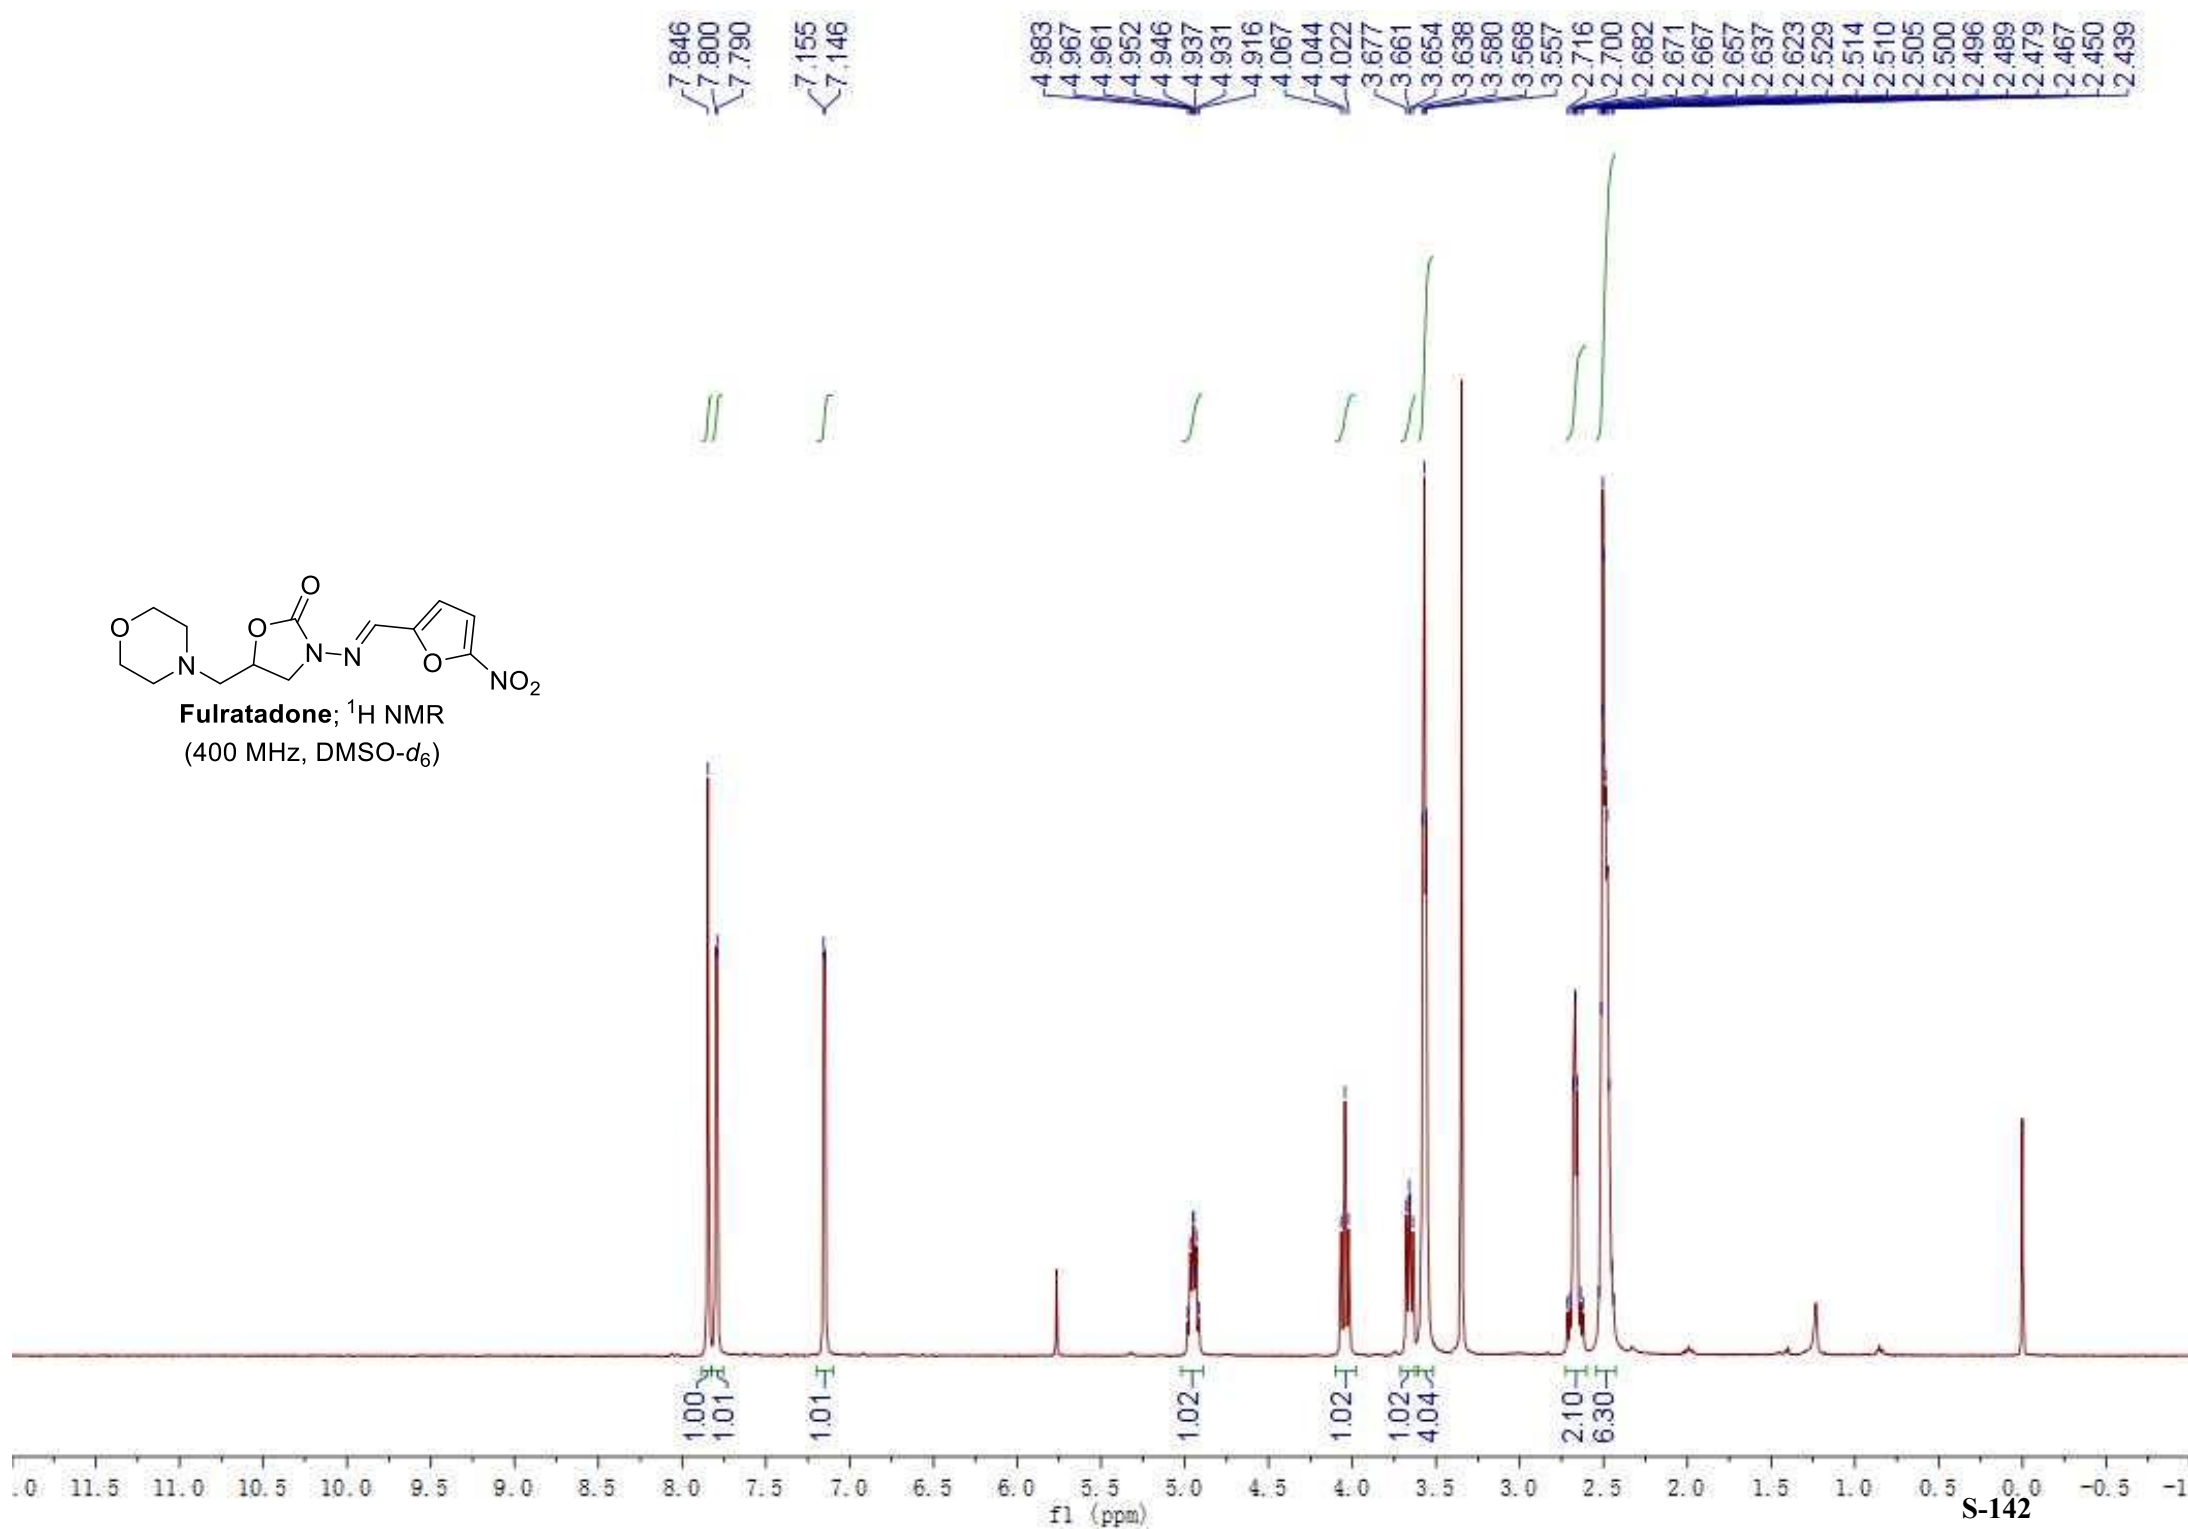

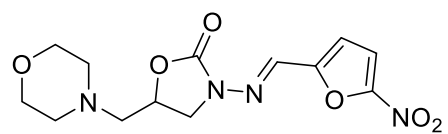

**Fulratadone**;  $^{13}\text{C}\{^1\text{H}\}$  NMR  
(101 MHz,  $\text{DMSO}-d_6$ )

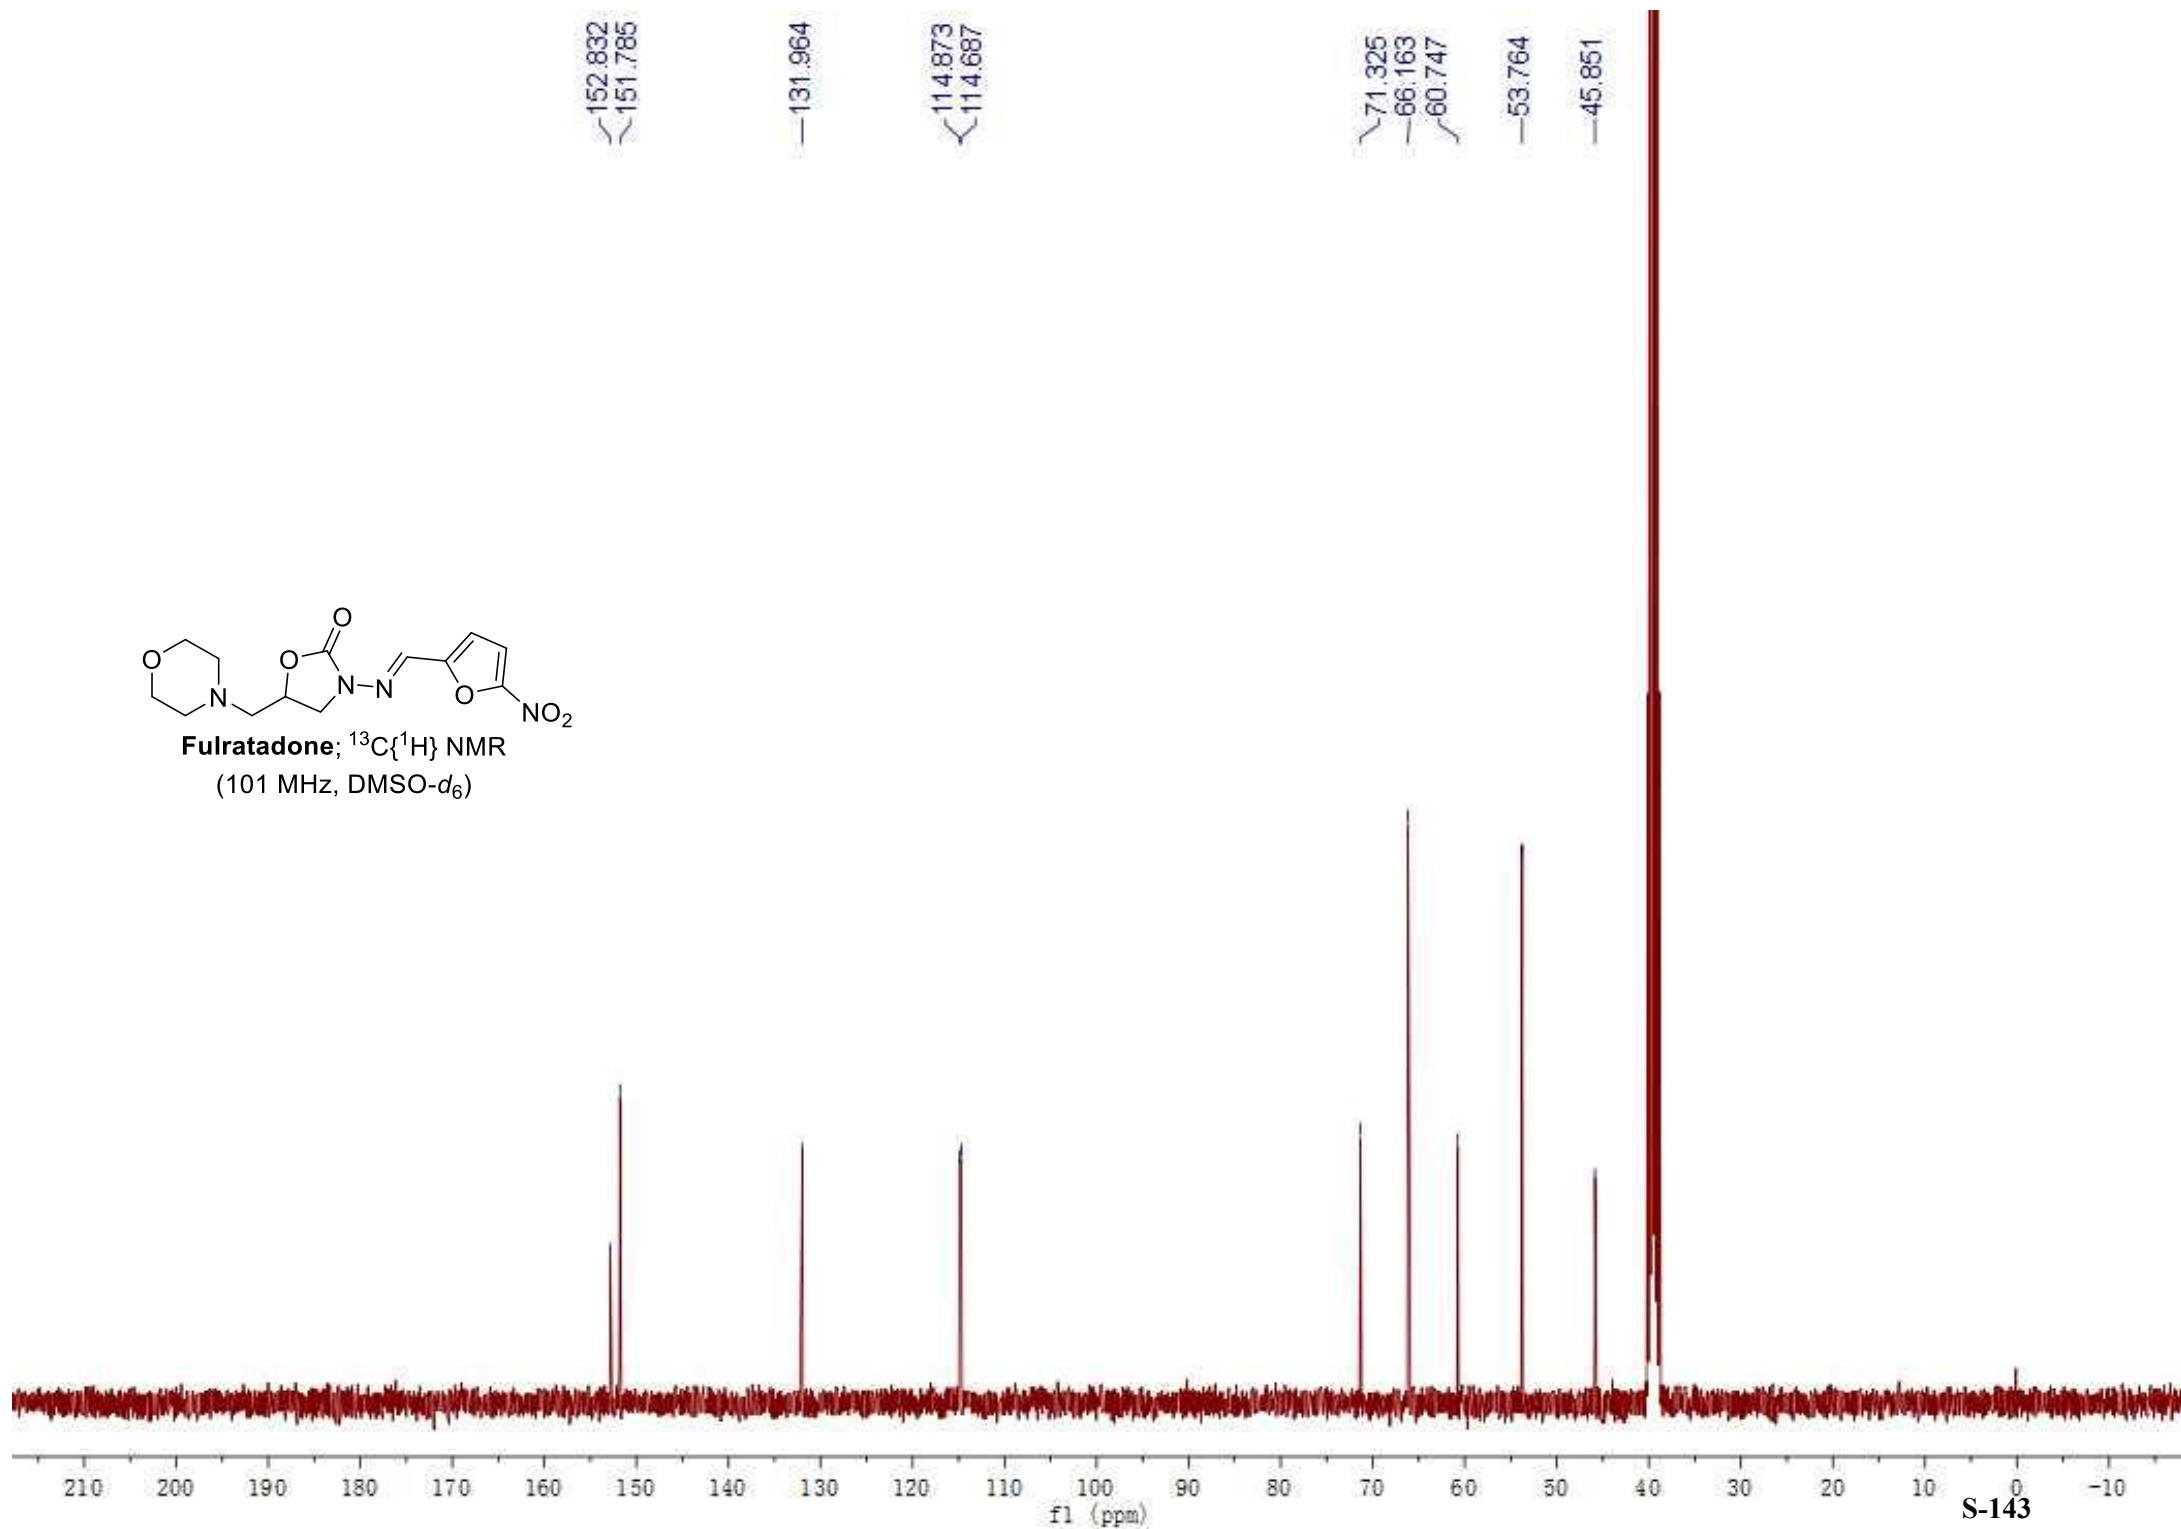

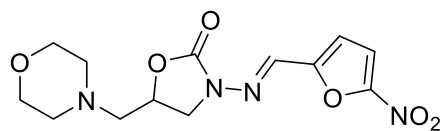

Fulratadone (from commercial sources);  $^1\text{H}$  NMR  
(400 MHz,  $\text{DMSO}-d_6$ )

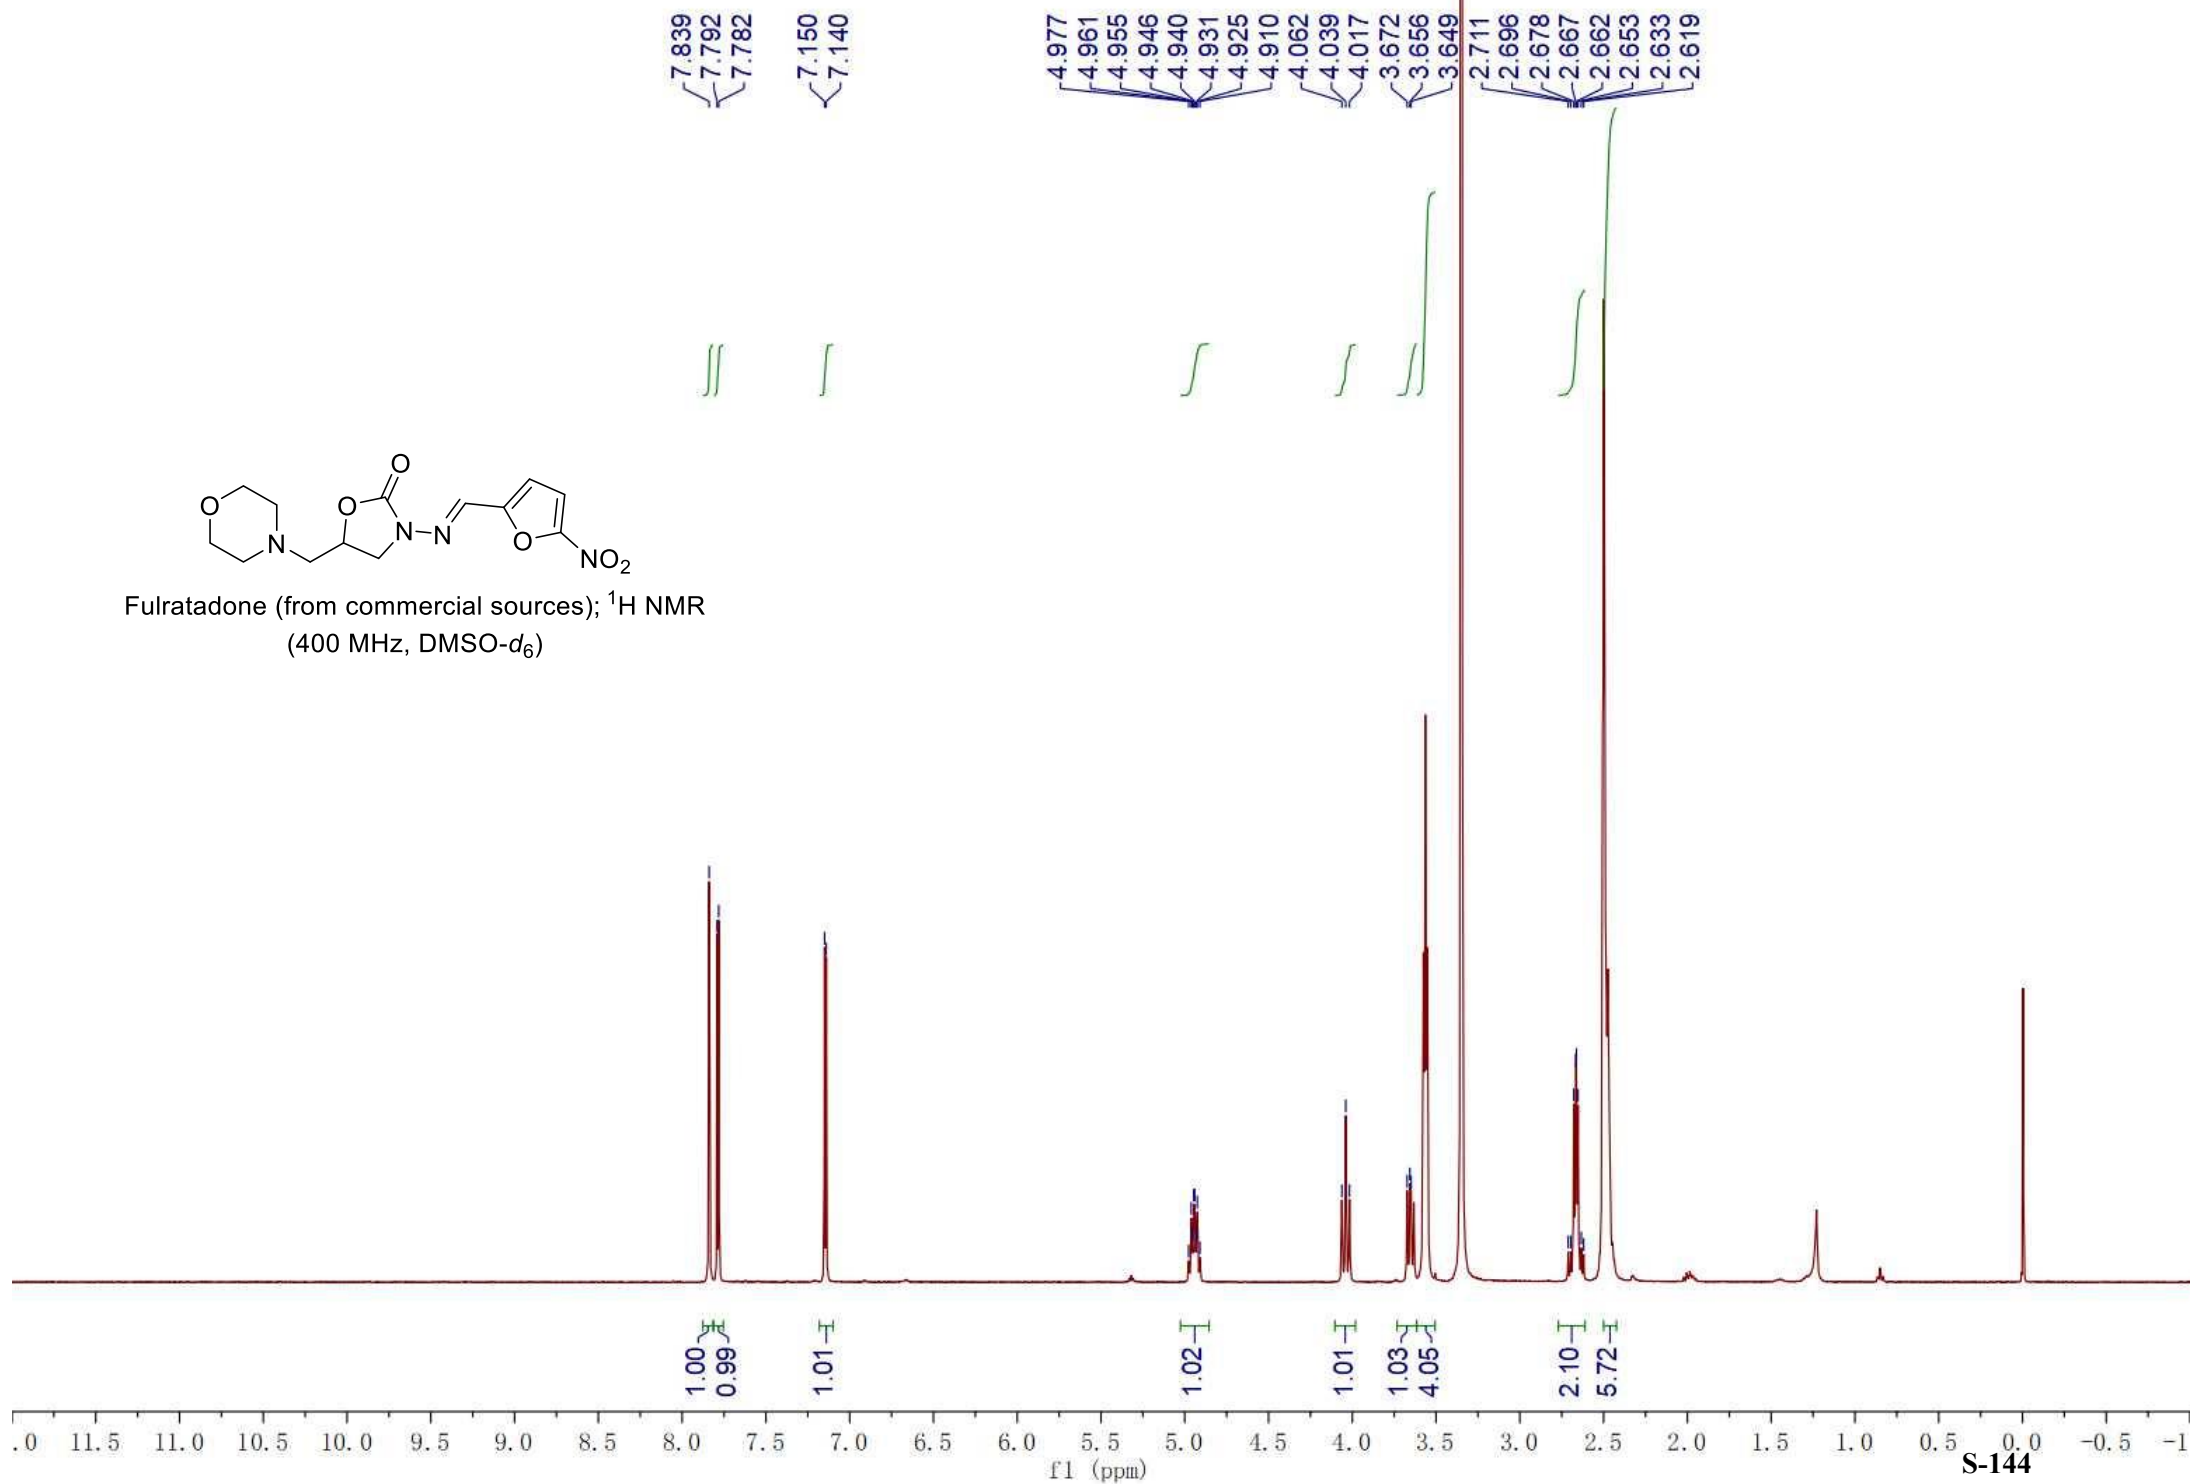

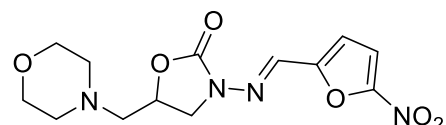

Fulratadone (from commercial sources);  $^{13}\text{C}\{^1\text{H}\}$  NMR  
(101 MHz, DMSO- $d_6$ )

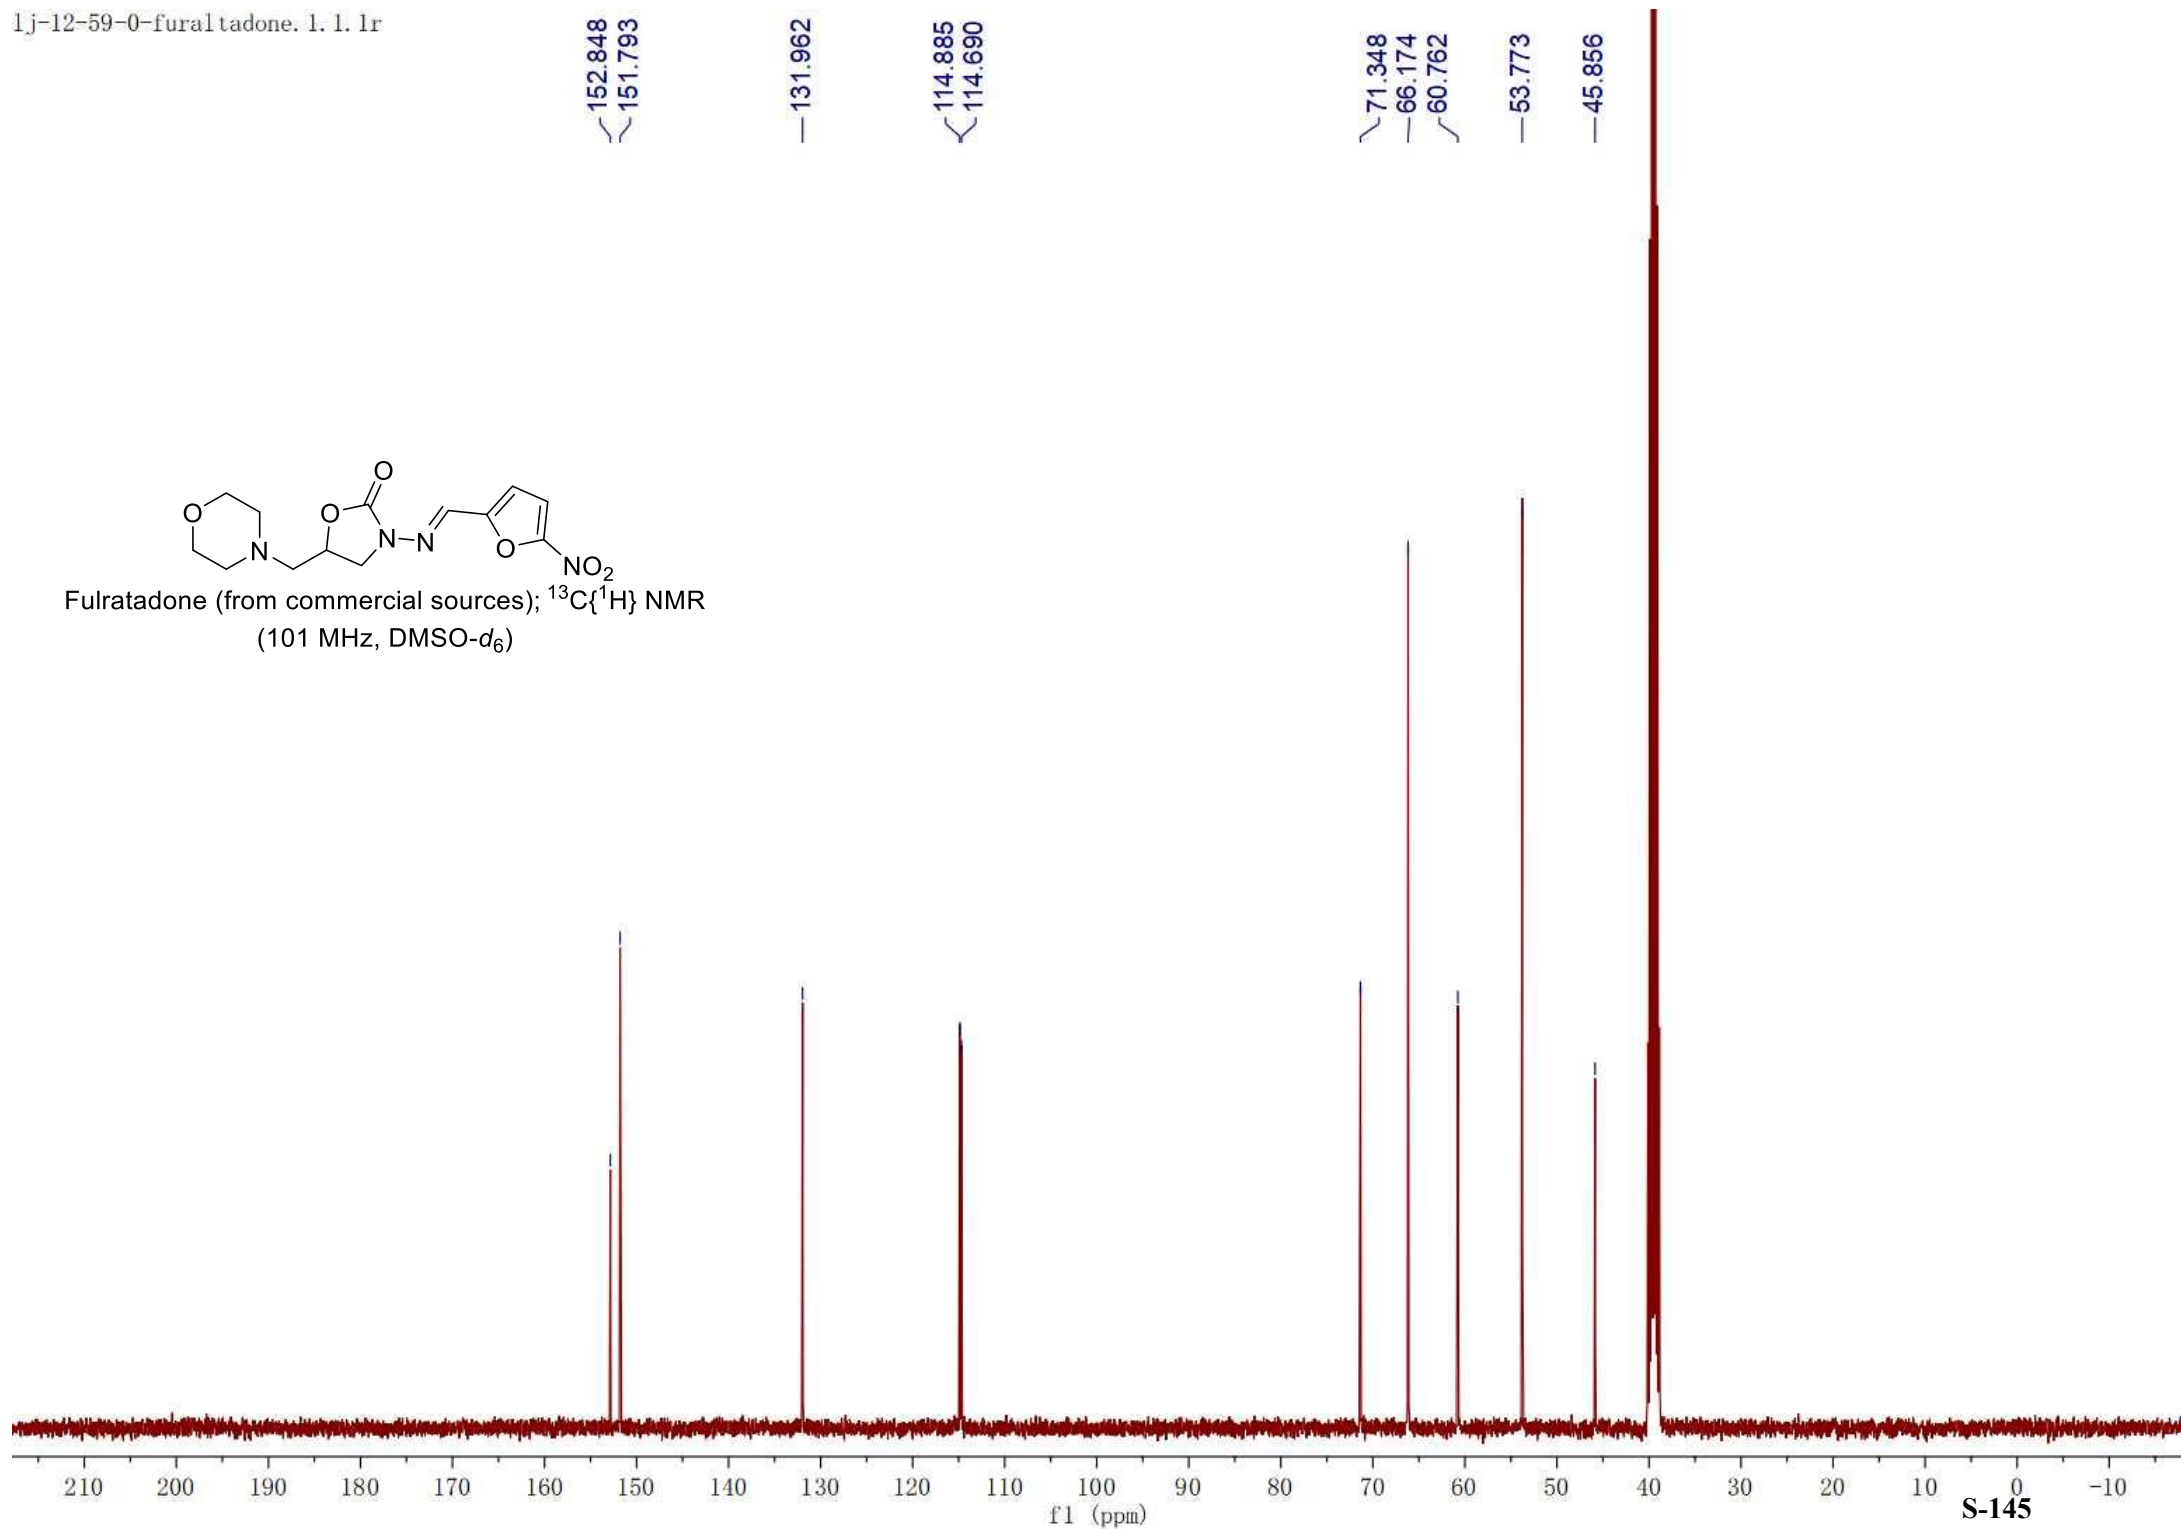

Supplement: d5qo01596k1.pdf [file d5qo01596k1.pdf]
